# Supplementary material for: Pooled protein tagging, cellular imaging, and in situ sequencing for monitoring drug action in real time
Source: PubMed Central journal article supplement — Genome Res. 2020 Dec;30(12):1846–55. doi: 10.1101/gr.261503.120 (PMC7706735; doi:10.1101/gr.261503.120), 2020-12
Supplement: supp_gr.261503.120_Supplemental_Fig_S1.pdf [file supp_gr.261503.120_Supplemental_Fig_S1.pdf]

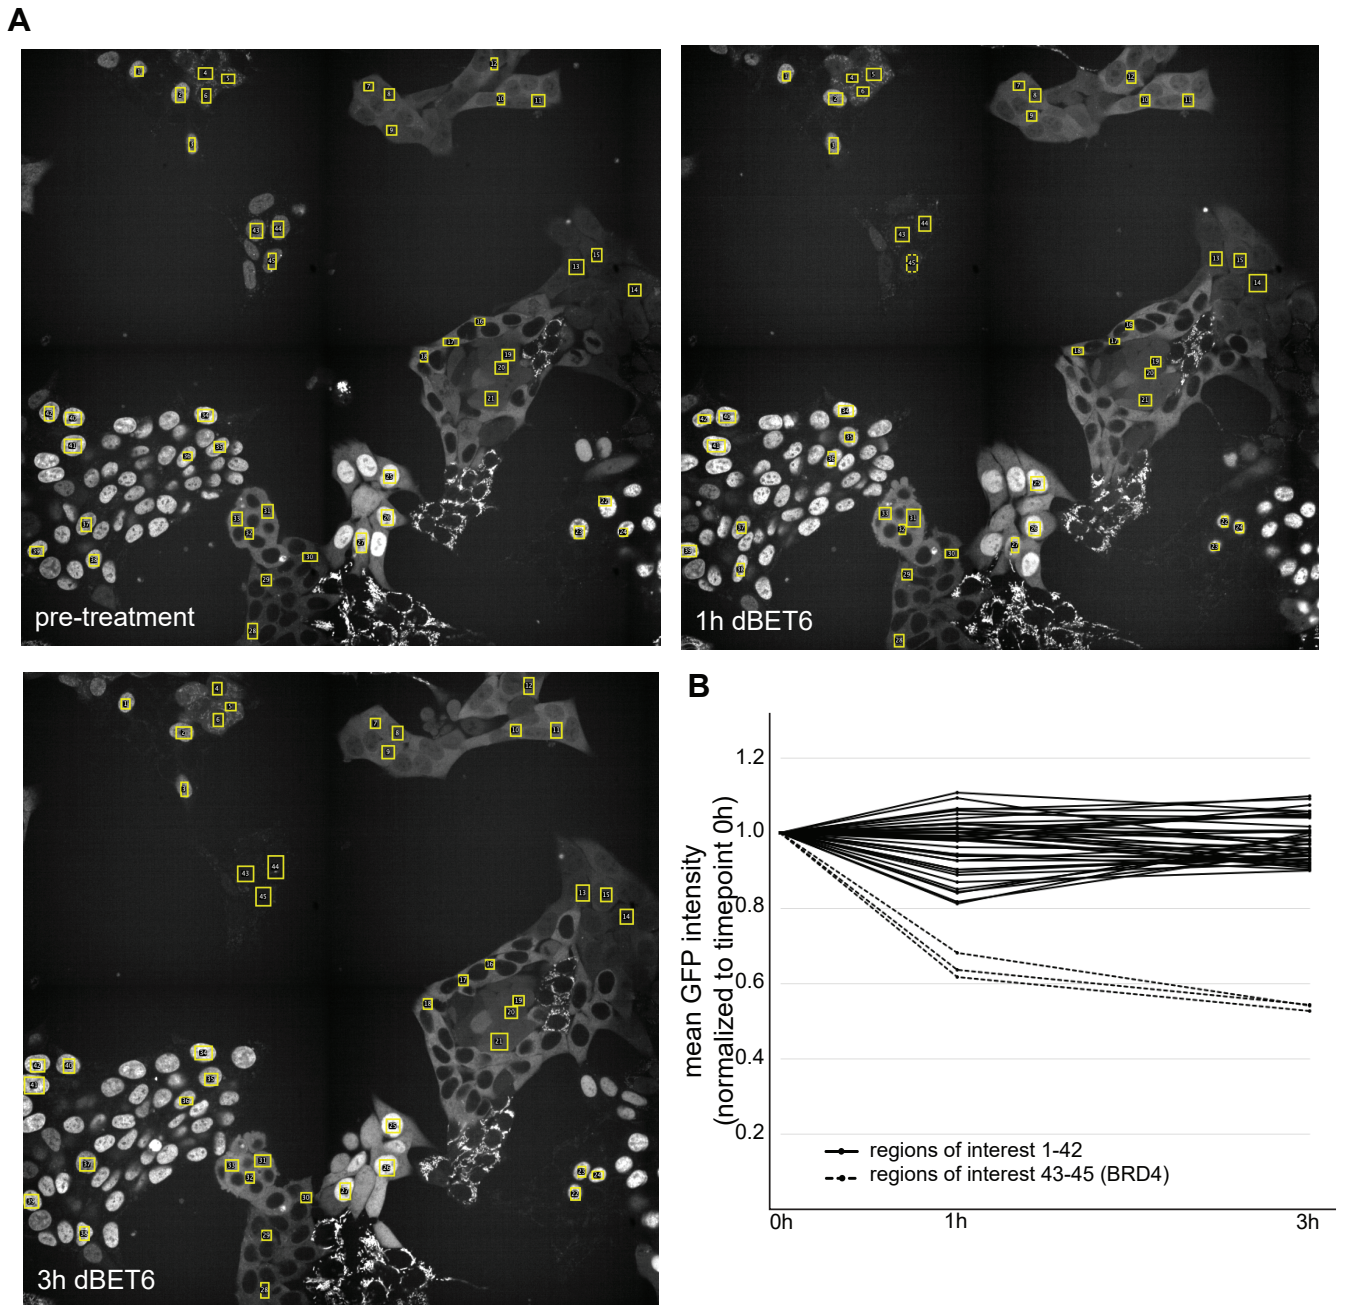

**Supplemental Figure S1. Quantification of GFP intensities in cells in the pool in response to compound treatment. A.** 45 regions of interest in the fields of view shown in Figure 3b were selected and the mean intensity values for those regions were determined before and after treatment with 100 nM dBET6. **B.** Relative change in GFP intensity in 45 regions of interest. The regions of interest overlapping with cells that were later identified as BRD4 are shown with dotted lines.
