# Supplementary material for: Pooled protein tagging, cellular imaging, and in situ sequencing for monitoring drug action in real time
Source: PubMed Central journal article supplement — Genome Res. 2020 Dec;30(12):1846–55. doi: 10.1101/gr.261503.120 (PMC7706735; doi:10.1101/gr.261503.120), 2020-12
Supplement: supp_gr.261503.120_Supplemental_Fig_S2.pdf [file supp_gr.261503.120_Supplemental_Fig_S2.pdf]

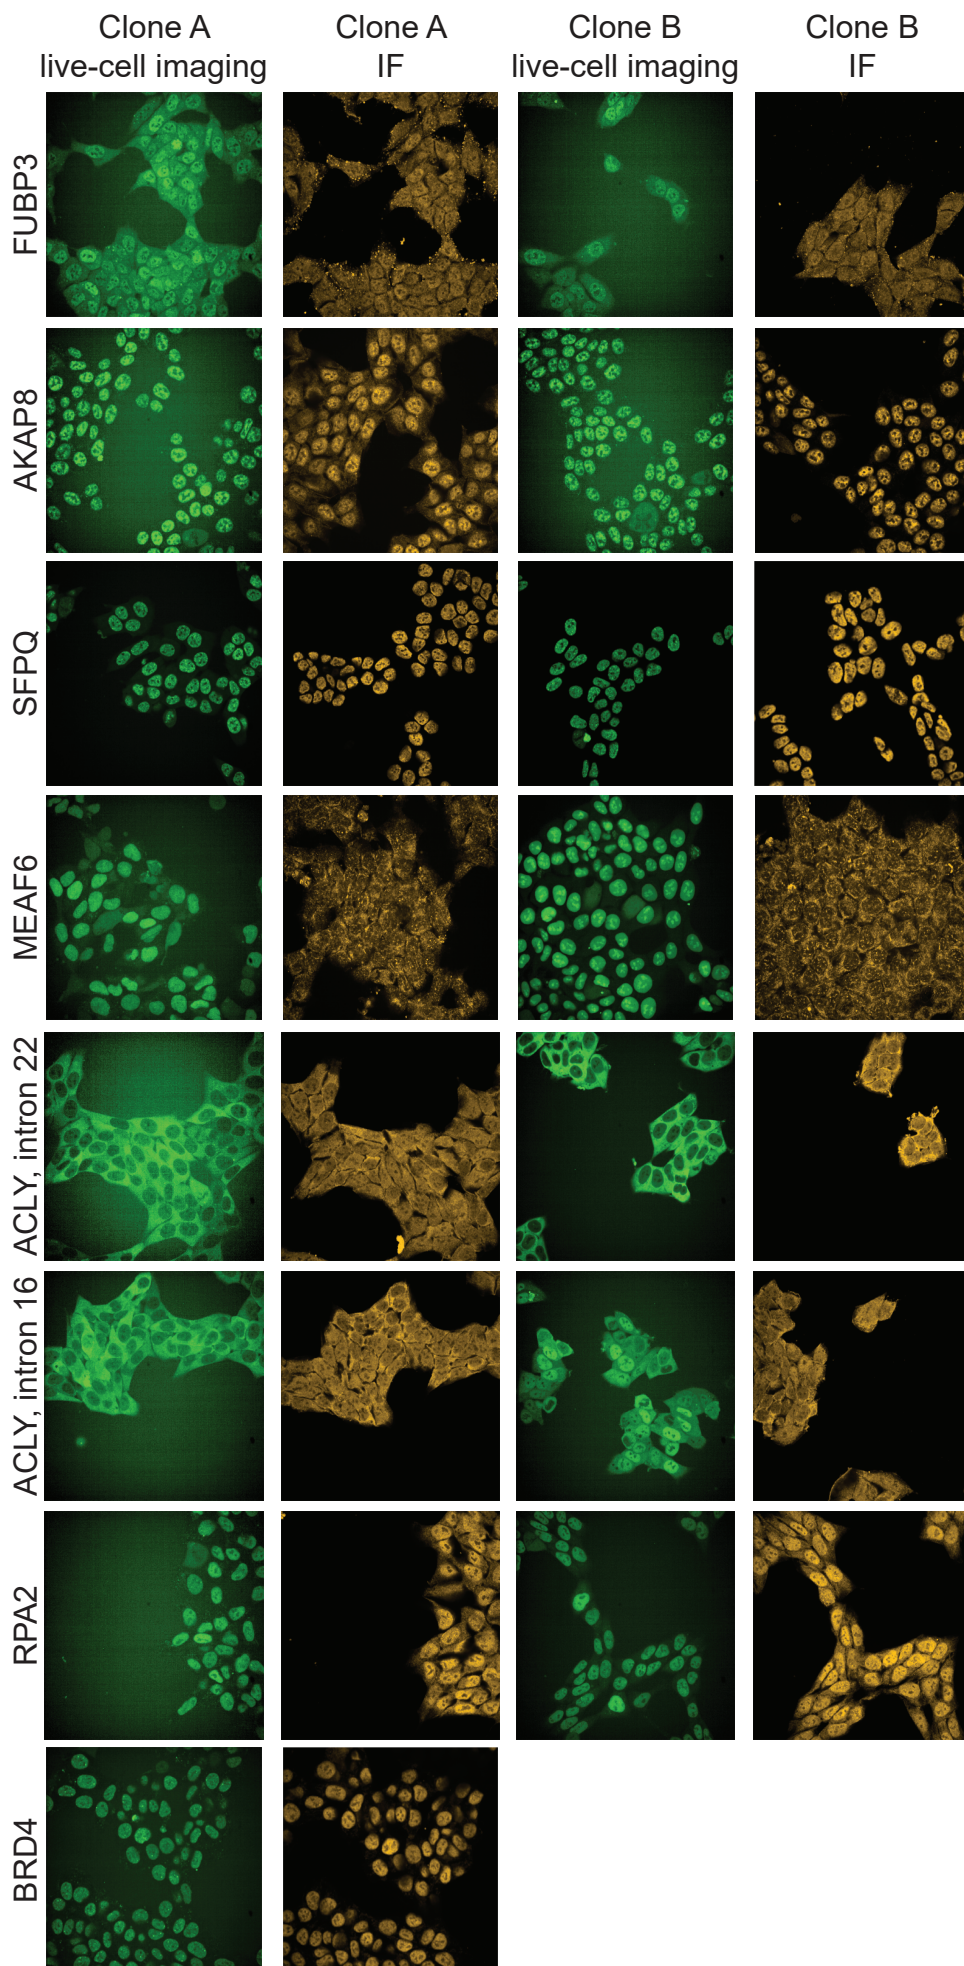

**Supplemental Figure S2. Live cell imaging and immunofluorescence staining in clonal cell lines expressing GFP tagged proteins.**
