# Supplementary material for: Pooled protein tagging, cellular imaging, and in situ sequencing for monitoring drug action in real time
Source: PubMed Central journal article supplement — Genome Res. 2020 Dec;30(12):1846–55. doi: 10.1101/gr.261503.120 (PMC7706735; doi:10.1101/gr.261503.120), 2020-12
Supplement: supp_gr.261503.120_Supplemental_Fig_S3.pdf [file supp_gr.261503.120_Supplemental_Fig_S3.pdf]

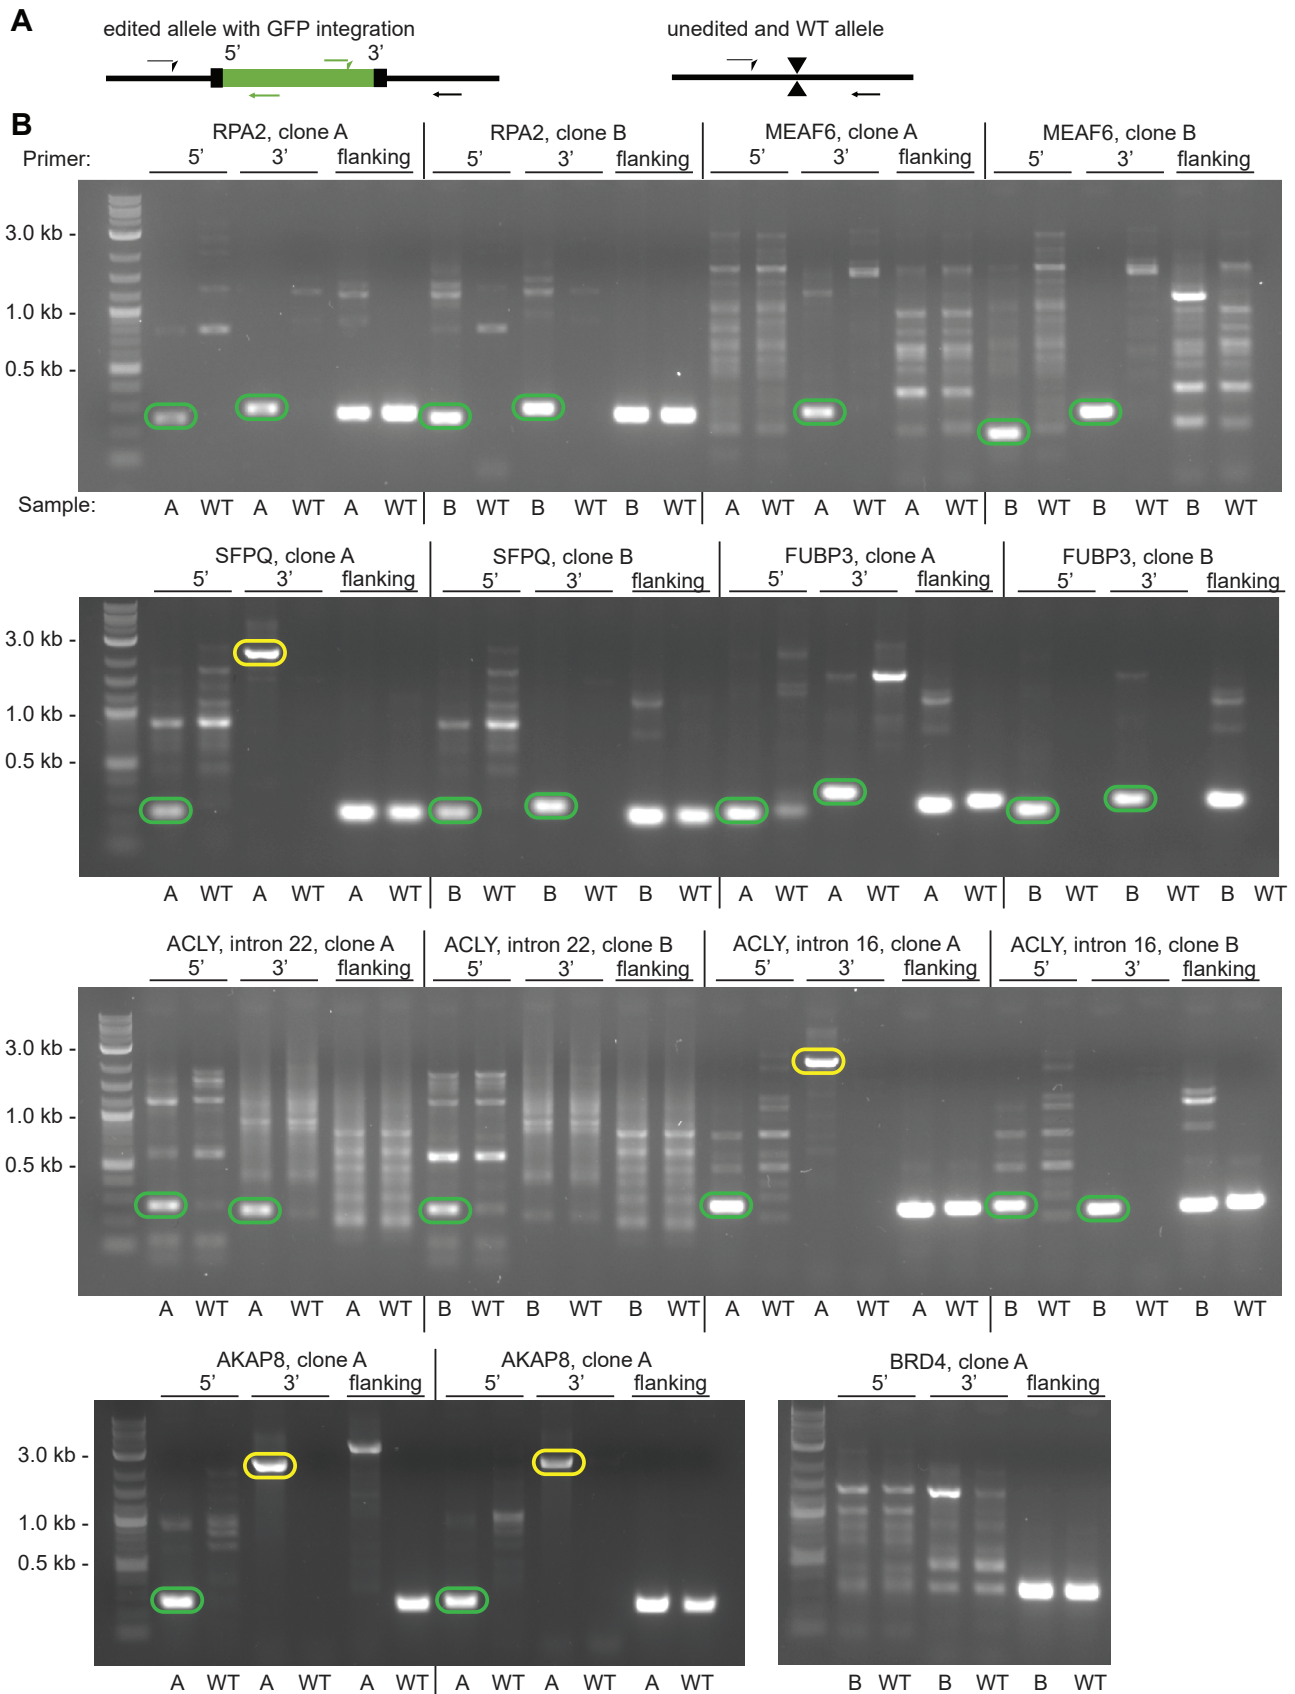

**Supplemental Figure S3. PCR analysis of newly generated GFP-tagged clonal cell lines.** **A.** Primers producing 200-300 bp amplicons at the 5' and 3' junctions of the GFP integration were used. To amplify the 5' junction, different intronic primers binding upstream of the GFP integration sites were used together with a primer binding to GFP and to amplify the 3' junction, different intronic primers binding downstream of the GFP integration sites were used together with a primer binding GFP were used. The intronic primers binding upstream and downstream of the integration site were also used together producing a 200-300 bp amplicon in wildtype cells as well as in GFP tagged cells, if there was an unedited allele without a GFP integration present in that clone. **B.** PCR products analyzed by gel electrophoresis of all clonal cell lines that were generated. Green circles indicate bands of the expected size that are only present in GFP tagged clonal cell lines but not in WT HAP1 cells. Yellow circles indicate bands present in GFP-tagged clonal cell lines and absent in wild type HAP1 cells, but of a bigger size than expected, indicating plasmid backbone integration.
