# Supplementary material for: Pooled protein tagging, cellular imaging, and in situ sequencing for monitoring drug action in real time
Source: PubMed Central journal article supplement — Genome Res. 2020 Dec;30(12):1846–55. doi: 10.1101/gr.261503.120 (PMC7706735; doi:10.1101/gr.261503.120), 2020-12
Supplement: supp_gr.261503.120_Supplemental_Fig_S5.pdf [file supp_gr.261503.120_Supplemental_Fig_S5.pdf]

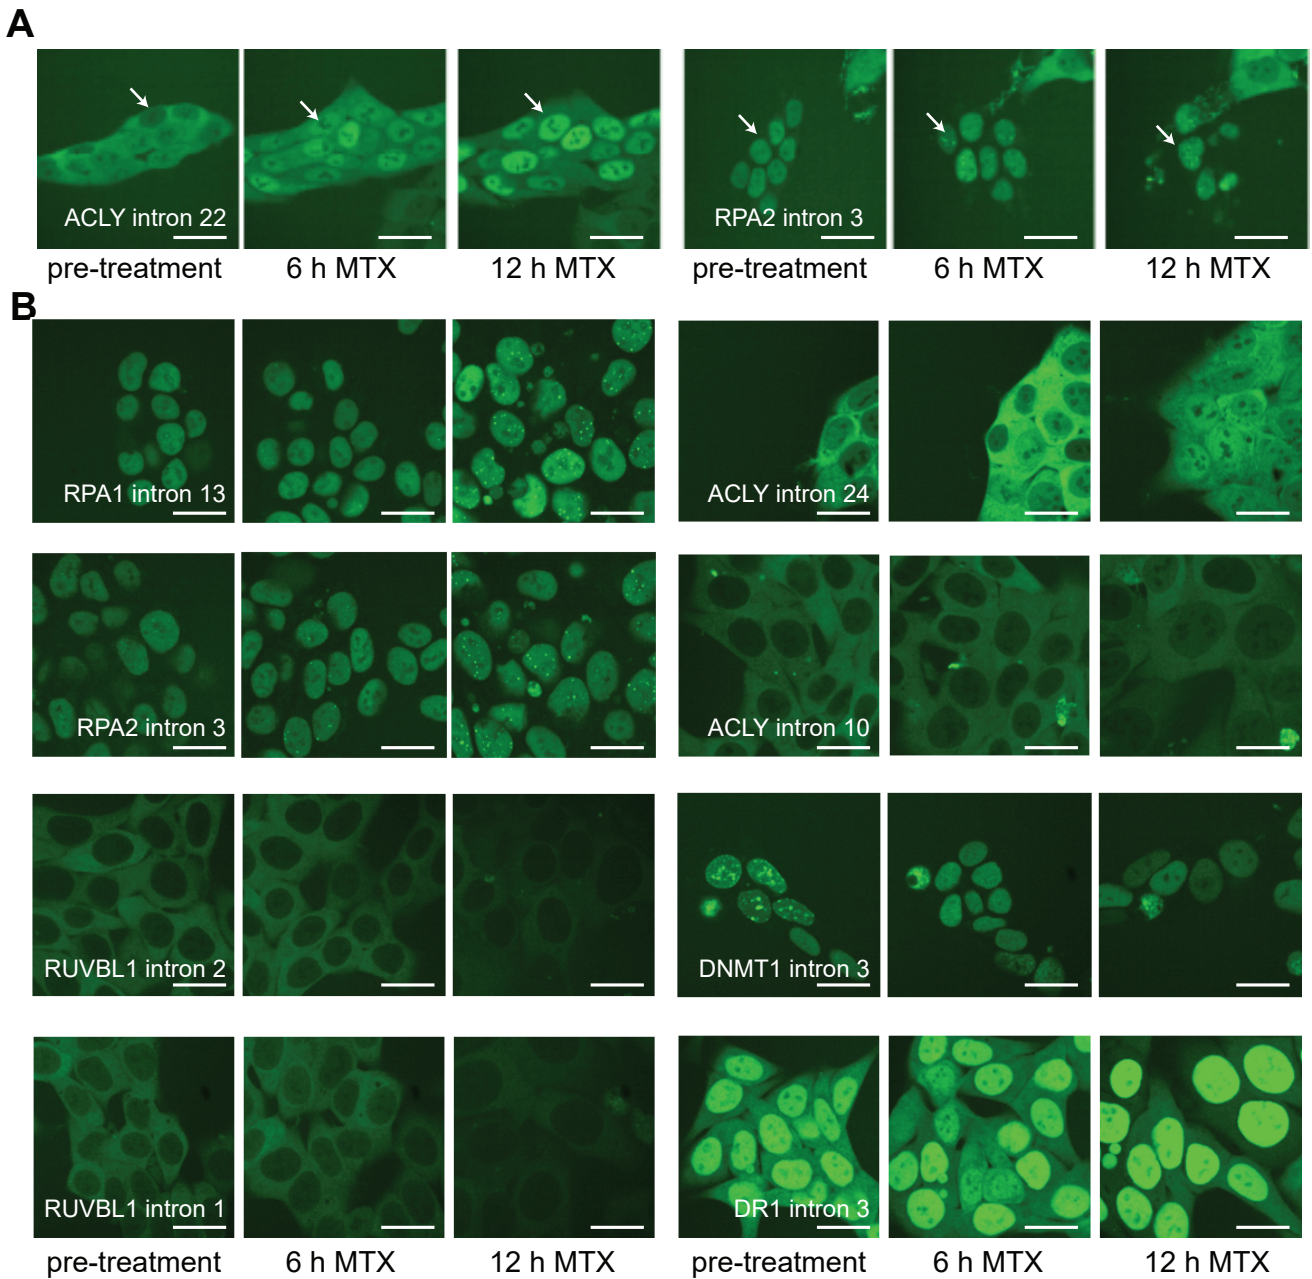

**Supplemental Figure S5. Time-dependent changes in protein localization and levels following treatment with 1  $\mu$ M methotrexate. A.** Selected images showing changes following methotrexate treatment in cell pools, annotated by clone identification from in situ sequencing (Scale bars 25  $\mu$ m). **B.** Selected images showing changes in 335 arrayed clones exposed to methotrexate (Scale bars 25  $\mu$ m).
