# Supplementary material for: Pooled protein tagging, cellular imaging, and in situ sequencing for monitoring drug action in real time
Source: PubMed Central journal article supplement — Genome Res. 2020 Dec;30(12):1846–55. doi: 10.1101/gr.261503.120 (PMC7706735; doi:10.1101/gr.261503.120), 2020-12
Supplement: supp_gr.261503.120_Supplemental_Note_S1.pdf [file supp_gr.261503.120_Supplemental_Note_S1.pdf]

## **Supplementary Note**

### **Protein localization imaging of 335 individual clones isolated from the cell pool**

### **Pooled protein tagging, cellular imaging and in situ sequencing for monitoring drug action in real time**

Andreas Reicher<sup>1</sup>, Anna Koren<sup>1</sup>, Stefan Kubicek<sup>1, 2, \*</sup>

<sup>1</sup>CeMM Research Center for Molecular Medicine of the Austrian Academy of Sciences. Lazarettgasse 14, 1090 Vienna, Austria.

<sup>2</sup>Christian Doppler Laboratory for Chemical Epigenetics and Antiinfectives, CeMM Research Center for Molecular Medicine of the Austrian Academy of Sciences, 1090 Vienna, Austria.

\* Correspondence to: Stefan Kubicek, CeMM Research Center for Molecular Medicine of the Austrian Academy of Sciences, Lazarettgasse 14 AKH BT 25.3 1090 Vienna, Austria. Phone +43-1/40160-70 036, Fax +43-1/40160-970 000, E-mail: [skubicek@cemm.oeaw.ac.at](mailto:skubicek@cemm.oeaw.ac.at)

Pool of GFP-tagged cells  
(one sgRNA per cell, ~953  
different genes)

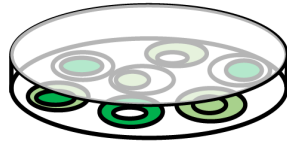

Single cell dilution

Imaging and NGS-based multiplex  
sgRNA amplicon sequencing  
(720 clonal cell lines)

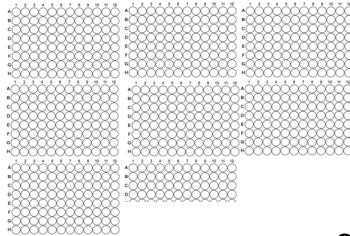

Clones excluded from  
further analysis:

- Confident annotation not possible due to no or very few sequencing reads in the corresponding well (182).
- Two or more sgRNAs detected in a single well due to multiple clones or clones expressing multiple sgRNAs (106).
- Sequencing reads, but no cells in any of the five fields of view that were imaged (58).
- No fluorescence detected in cells (39).

Comparison of the subcellular protein  
localization with annotations from  
The Human Protein Atlas  
(335 clonal cell lines)

Images of 335 clonal cell  
lines, covering 264 different  
introns of 212 proteins

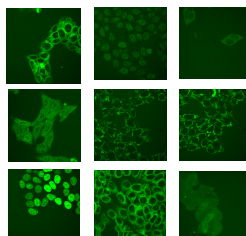

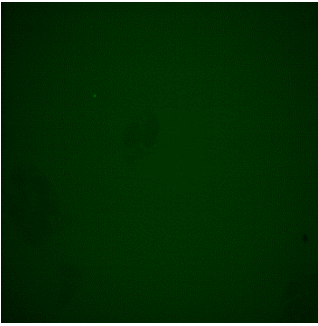

ABAT, Intron 12\_1  
Mitochondria (weak)  
Human Protein Atlas:  
Mitochondria  
M\_id

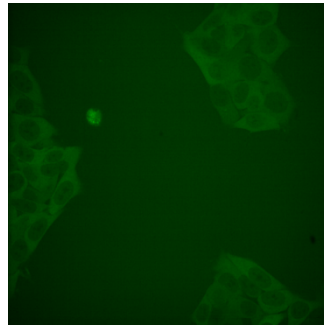

ACAA1, Intron 1\_2  
Cytoplasm, Nucleus  
Human Protein Atlas:  
Peroxisomes  
C\_dis

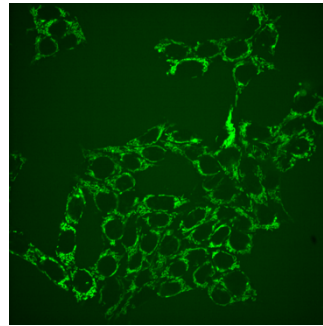

ACAT1, Intron 1\_1  
Mitochondria  
Human Protein Atlas:  
Mitochondria  
M\_id

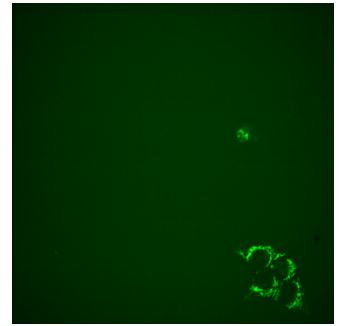

ACAT1, Intron 5\_1  
Mitochondria  
Human Protein Atlas:  
Mitochondria  
M\_id

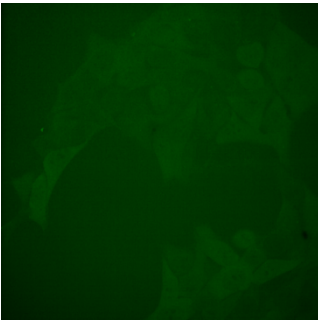

ACBD7, Intron 1\_3  
Cytoplasm, Nucleus  
Human Protein Atlas:  
Vesicles, Cytosol  
C\_sim

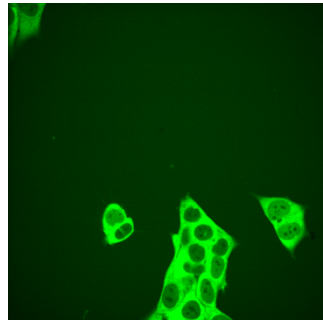

ACLY, Intron 7\_1  
Cytoplasm, Nucleus  
Human Protein Atlas: Plasma  
membrane, Cytosol,  
Nucleoplasm; C\_id

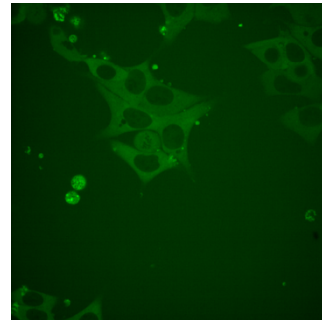

ACLY, Intron 10\_1  
Cytoplasm, Nucleus  
Human Protein Atlas: Plasma  
membrane, Cytosol,  
Nucleoplasm, C\_id

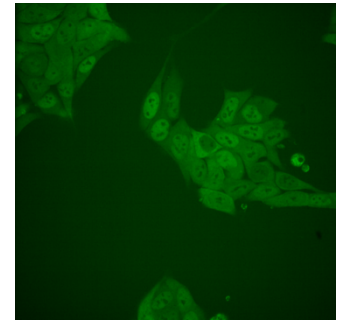

ACLY, Intron 22\_1  
Cytoplasm, Nucleus  
Human Protein Atlas: Plasma  
membrane, Cytosol,  
Nucleoplasm, C\_id

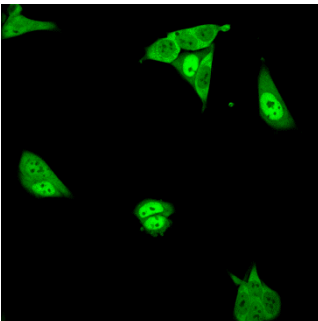

ACLY, Intron 22\_1  
Cytoplasm, Nucleus  
Human Protein Atlas: Plasma  
membrane, Cytosol,  
Nucleoplasm, C\_id

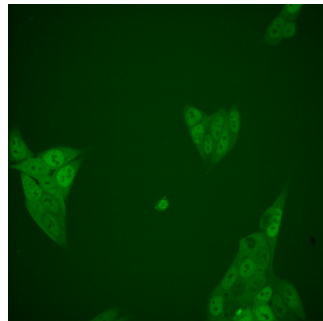

ACLY, Intron 22\_1  
Cytoplasm, Nucleus  
Human Protein Atlas: Plasma  
membrane, Cytosol,  
Nucleoplasm, C\_id

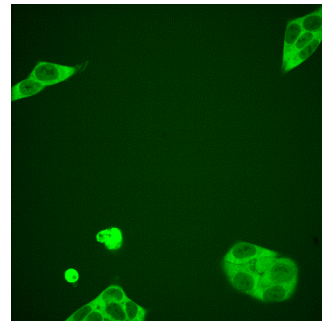

ACLY, Intron 24\_1  
Cytoplasm, Nucleus  
Human Protein Atlas: Plasma  
membrane, Cytosol,  
Nucleoplasm, C\_id

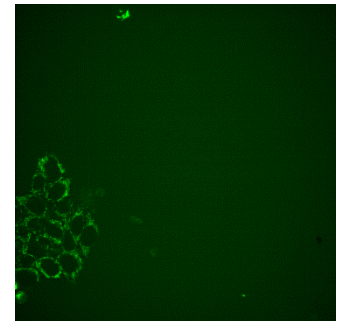

ACO2, Intron 8\_1  
Mitochondria  
Human Protein Atlas:  
Mitochondria  
M\_id

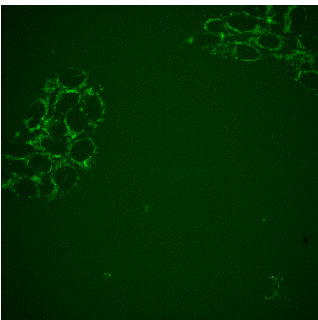

ACO2, Intron 15\_1  
Mitochondria  
Human Protein Atlas:  
Mitochondria  
M\_id

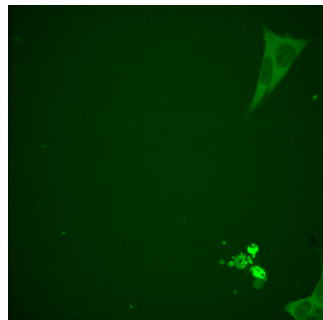

ACOT7, Intron 2\_2  
Cytoplasm, Nucleus  
Human Protein Atlas: Cytosol,  
Nucleoplasm  
C\_id

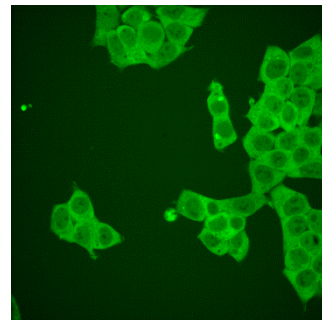

ACOT7, Intron 2\_2  
Cytoplasm, Nucleus  
Human Protein Atlas: Cytosol,  
Nucleoplasm  
C\_id

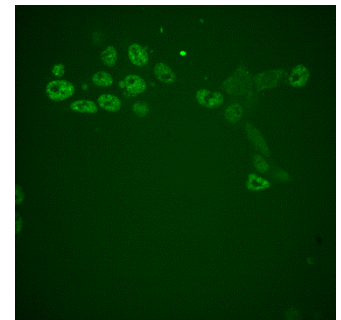

AKAP8L, Intron 13\_1  
Nucleus  
Human Protein Atlas: Nuclear  
speckles  
N\_id

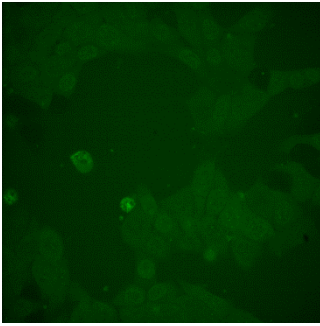

AKR1C2, Intron 5\_1  
 Cytoplasm, Nucleus  
 Human Protein Atlas:  
 Nucleoplasm, Cytosol, Nucleoli  
 fibrillary center, ER, C\_sim

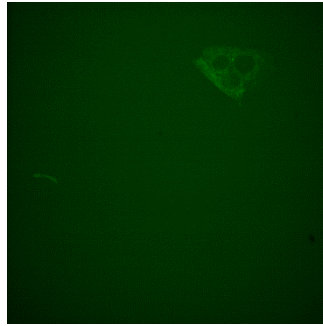

ALDH1A3, Intron 7\_1  
 ER  
 Human Protein Atlas:  
 Nucleoplasm, Cytosol  
 ER\_dis

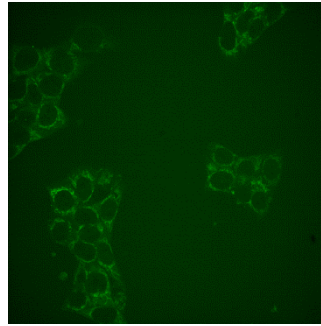

ALDH7A1, Intron 1\_1  
 Mitochondria, Cytoplasm  
 Human Protein Atlas:  
 Mitochondria, Cytosol  
 M\_id

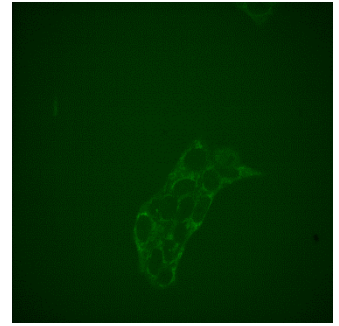

ALDH7A1, Intron 1\_1  
 Mitochondria, Cytoplasm  
 Human Protein Atlas:  
 Mitochondria, Cytosol  
 M\_id

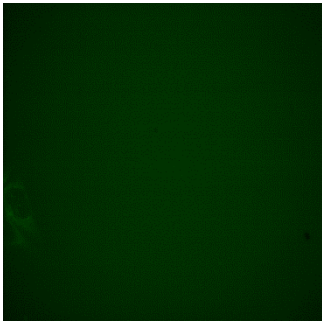

ALDH9A1, Intron 6\_1  
 Cytoplasm, Mitochondria  
 Human Protein Atlas: Cytosol  
 C\_sim

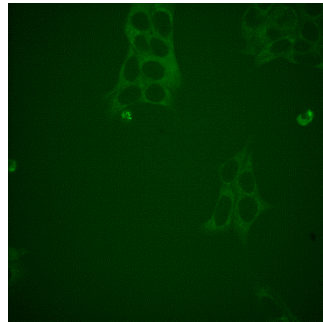

ALDH9A1, Intron 6\_1  
 Cytoplasm, Mitochondria  
 Human Protein Atlas: Cytosol  
 C\_sim

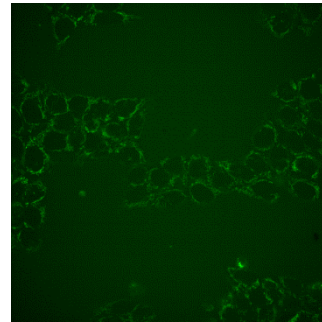

ALDH18A1, Intron 12\_1  
 Mitochondria  
 Human Protein Atlas:  
 Mitochondria  
 M\_id

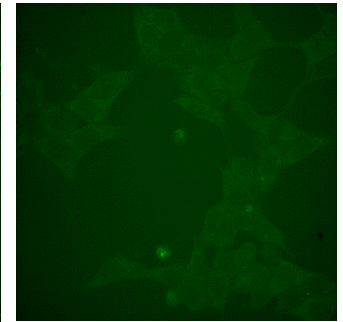

APOO, Intron 1\_1  
 Cytoplasm, Nucleus,  
 Mitochondria  
 Human Protein Atlas:  
 Mitochondria, Cytosol, M\_sim

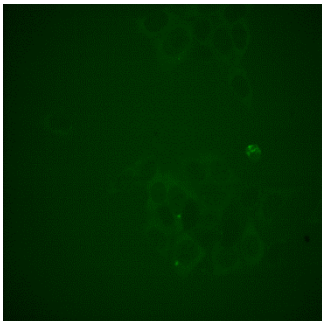

APRT, Intron 3\_1  
 Cytoplasm, Nucleus  
 Human Protein Atlas:  
 Nucleoplasm, Cytosol  
 C\_id

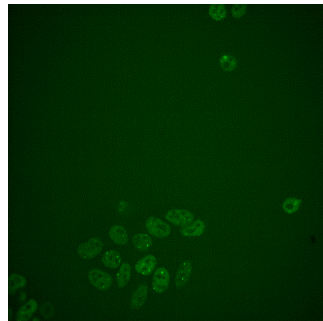

ARG1, Intron 4\_1  
 Nucleus  
 Human Protein Atlas:  
 unknown  
 N\_unk

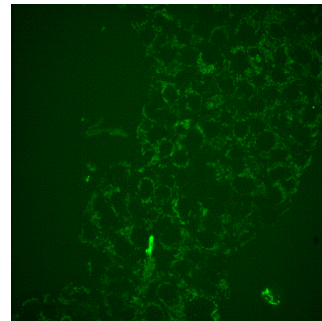

ARG2, Intron 4\_1  
 Mitochondria  
 Human Protein Atlas:  
 Mitochondria  
 M\_id

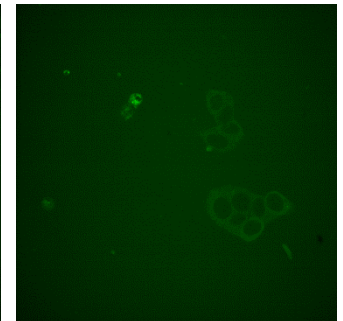

ASNS, Intron 8\_1  
 Cytoplasm  
 Human Protein Atlas: Cytosol  
 C\_id

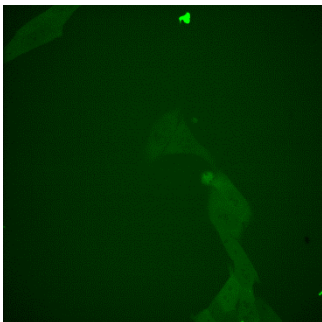

ASRGL1, Intron 3\_1  
 Cytoplasm, Nucleus  
 Human Protein Atlas:  
 Microtubules, Nucleoplasm  
 C\_id

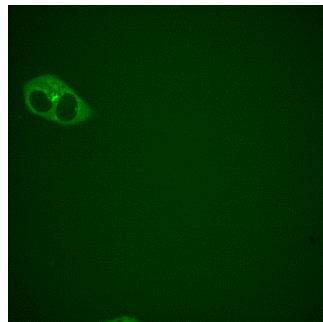

ATAD3A, Intron 4\_1  
 Cytoplasm, Mitochondria  
 Human Protein Atlas:  
 Mitochondria  
 C\_sim

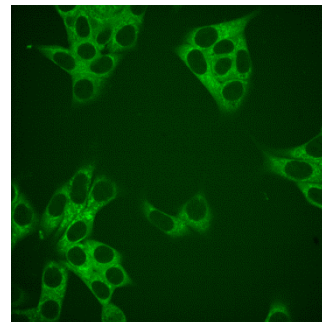

ATAD3A, Intron 4\_1  
 Cytoplasm, Mitochondria  
 Human Protein Atlas:  
 Mitochondria  
 C\_sim

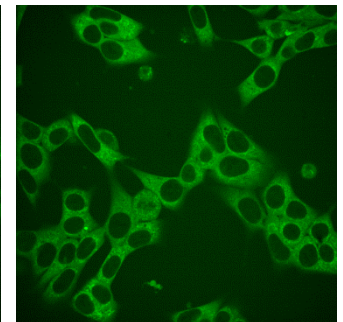

ATAD3A, Intron 4\_1  
 Cytoplasm, Mitochondria  
 Human Protein Atlas:  
 Mitochondria  
 C\_sim

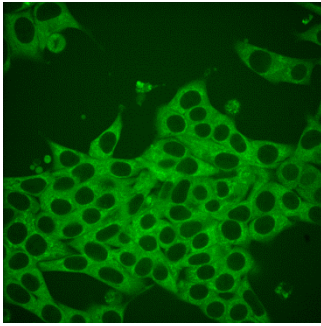

ATAD3A, Intron 4\_1  
Cytoplasm, Mitochondria  
Human Protein Atlas:  
Mitochondria  
C\_sim

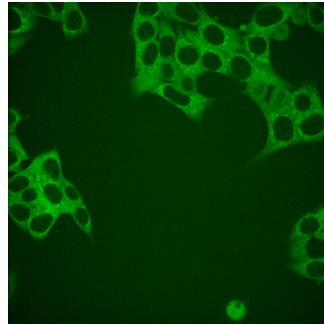

ATAD3A, Intron 4\_1  
Cytoplasm, Mitochondria  
Human Protein Atlas:  
Mitochondria  
C\_sim

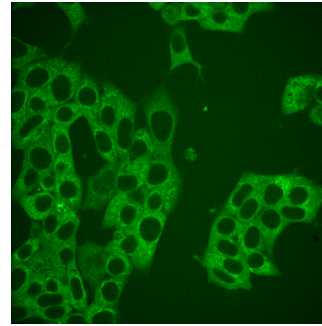

ATAD3A, Intron 4\_1  
Cytoplasm, Mitochondria  
Human Protein Atlas:  
Mitochondria  
C\_sim

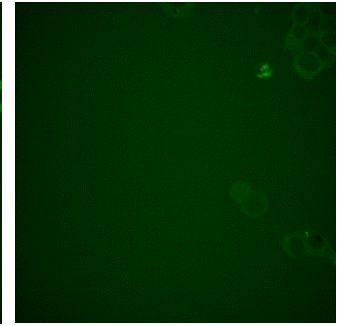

ATAD3B, Intron 7\_1  
Cytoplasm  
Human Protein Atlas:  
Mitochondria  
C\_dis

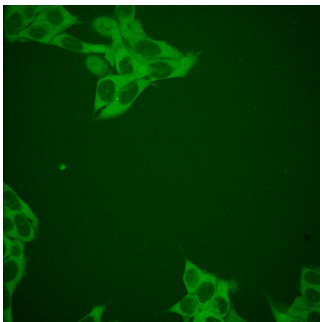

ATIC, Intron 14\_1  
Cytoplasm, Nucleus  
Human Protein Atlas: Plasma  
membrane, Cytosol  
C\_sim

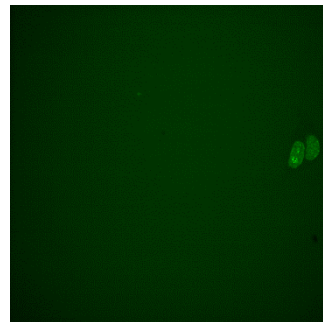

ATRX, Intron 15\_1  
Nucleus  
Human Protein Atlas: Nuclear  
bodies  
N\_id

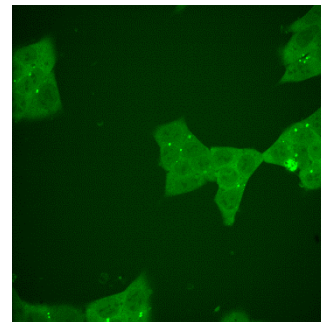

AURKA, Intron 3\_1  
Cytoplasm, Nucleus  
Human Protein Atlas:  
Nucleoplasm, Centrosome,  
Cytosol, C\_id

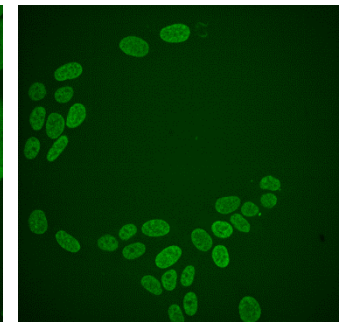

BAZ1A, Intron 7\_1  
Nucleus  
Human Protein Atlas: ER  
N\_dis

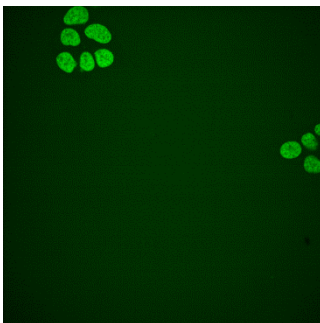

BAZ1B, Intron 17\_1  
Nucleus  
Human Protein Atlas: Nuclear  
bodies  
N\_id

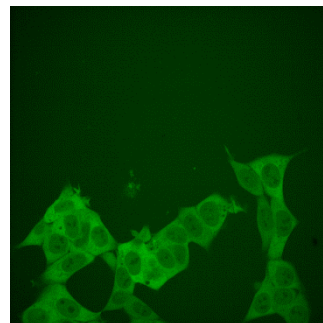

BCAT1, Intron 1\_1  
Cytoplasm, Nucleus  
Human Protein Atlas:  
unknown  
C\_unk

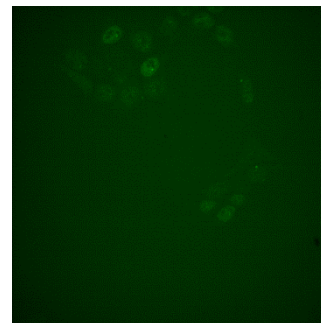

BCAT2, Intron 2\_1  
Nucleus  
Human Protein Atlas:  
Mitochondria  
N\_dis

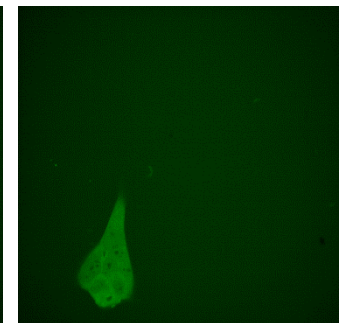

BLVRA, Intron 2\_1  
Cytoplasm, Nucleus  
Human Protein Atlas: Cytosol  
C\_sim

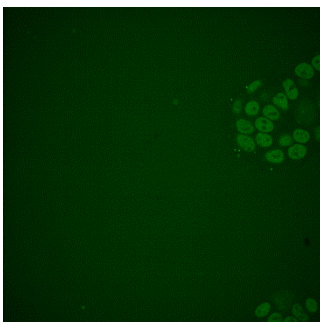

BRD8, Intron 13\_1  
Nucleus  
Human Protein Atlas:  
Nucleoplasm, Mitochondria  
N\_sim

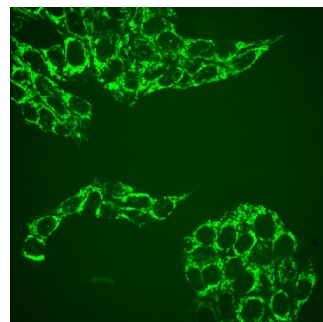

CA4, Intron 5\_1  
Mitochondria  
Human Protein Atlas: Vesicles  
M\_dis

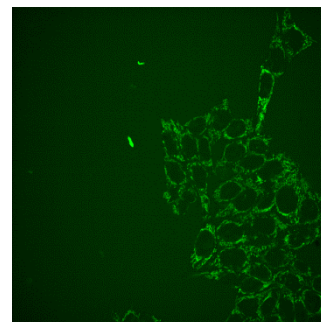

CARS2, Intron 9\_1  
Mitochondria  
Human Protein Atlas:  
Nucleoplasm, Mitochondria  
M\_sim

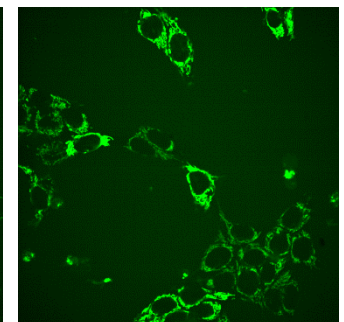

CARS2, Intron 13\_1  
Mitochondria  
Human Protein Atlas:  
Nucleoplasm, Mitochondria  
M\_sim

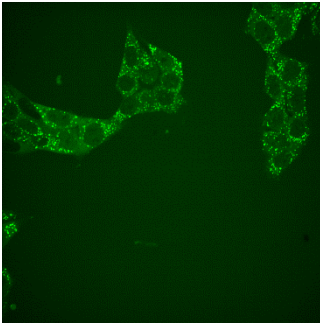

CAT, Intron 1\_1  
Vesicles, Cytoplasm, Nucleus  
Human Protein Atlas: Vesicles  
C\_sim

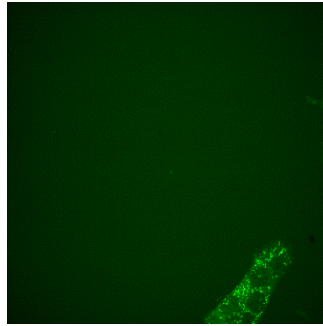

CAT, Intron 1\_1  
Vesicles, Cytoplasm, Nucleus  
Human Protein Atlas: Vesicles  
C\_sim

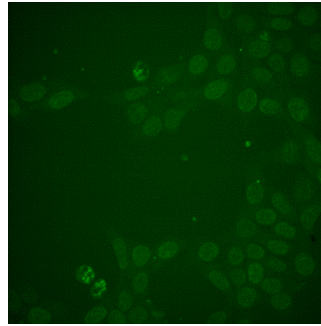

CBX8, Intron 1\_1  
Nucleus, Cytoplasm  
Human Protein Atlas:  
Nucleoplasm  
N\_sim

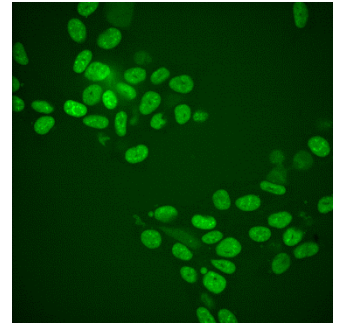

CDC73, Intron 7\_1  
Nucleus  
Human Protein Atlas:  
Nucleoplasm, Cytosol  
N\_sim

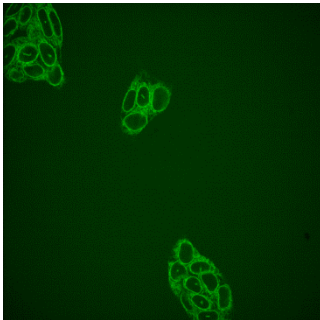

CERS2, Intron 3\_1  
ER, Nuclear membrane  
Human Protein Atlas: Nuclear  
membrane, ER  
ER\_id

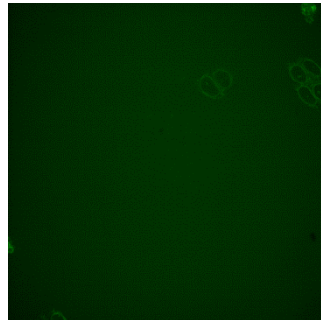

CERS2, Intron 5\_1  
ER, Nuclear membrane  
Human Protein Atlas: Nuclear  
membrane, ER  
ER\_id

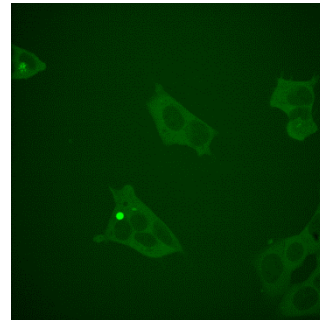

CNDP2, Intron 8\_1  
Cytoplasm, Nucleus  
Human Protein Atlas:  
Nucleoplasm, Cytosol  
C\_id

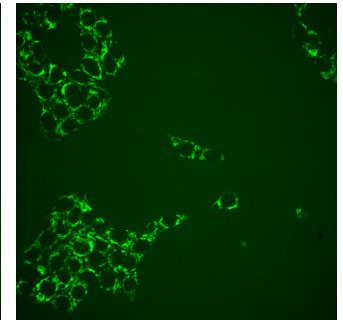

COQ10A, Intron 3\_1  
Mitochondria  
Human Protein Atlas: Cytosol,  
ER, Golgi  
M\_dis

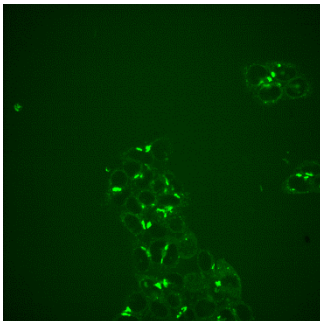

COX6C, Intron 2\_2  
other  
Human Protein Atlas:  
Mitochondria  
C\_dis

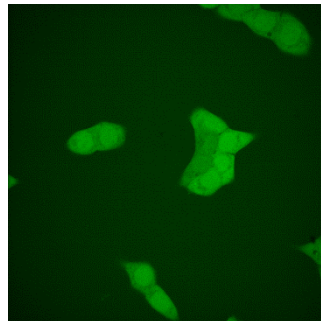

COX7A2, Intron 2\_1  
Cytoplasm, Nucleus  
Human Protein Atlas:  
unknown  
C\_unk

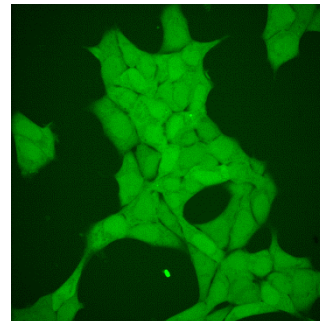

COX7A2, Intron 2\_2  
Cytoplasm, Nucleus  
Human Protein Atlas:  
unknown  
C\_unk

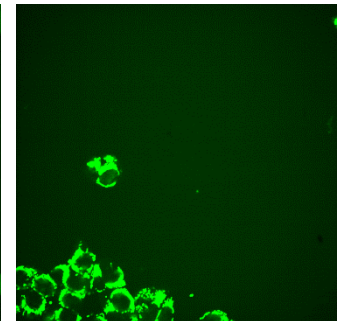

COX8A, Intron 1\_2  
Mitochondria  
Human Protein Atlas:  
unknown  
M\_unk

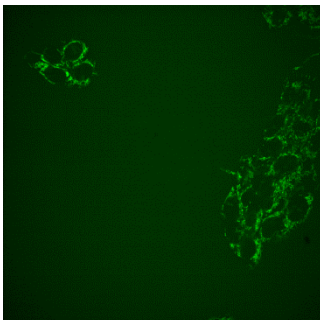

COX15, Intron 1\_1  
Mitochondria  
Human Protein Atlas:  
Mitochondria  
M\_id

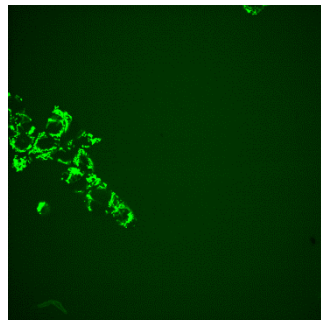

CS, Intron 6\_1  
Mitochondria  
Human Protein Atlas:  
Mitochondria  
M\_id

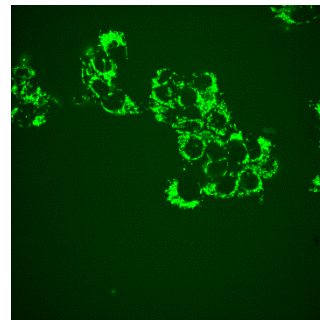

CS, Intron 6\_1  
Mitochondria  
Human Protein Atlas:  
Mitochondria  
M\_id

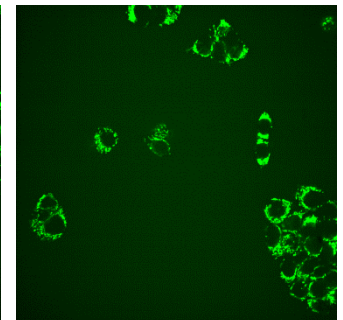

CS, Intron 6\_1  
Mitochondria  
Human Protein Atlas:  
Mitochondria  
M\_id

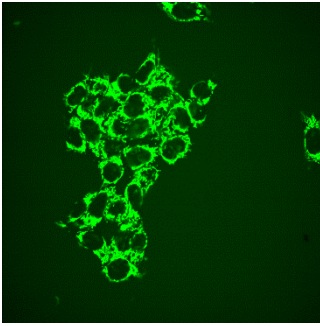

CS, Intron 10\_1  
Mitochondria  
Human Protein Atlas:  
Mitochondria  
M\_id

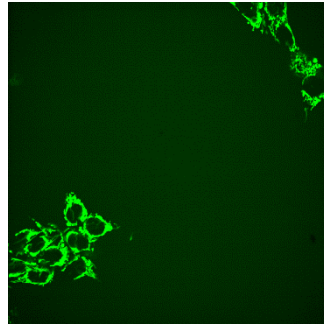

CS, Intron 10\_1  
Mitochondria  
Human Protein Atlas:  
Mitochondria  
M\_id

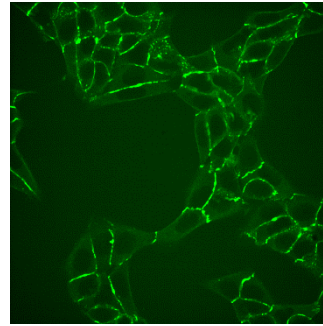

CTNNB1, Intron 4\_1  
Plasma membrane,  
Cytoplasm  
Human Protein Atlas: Plasma  
membrane, C\_id

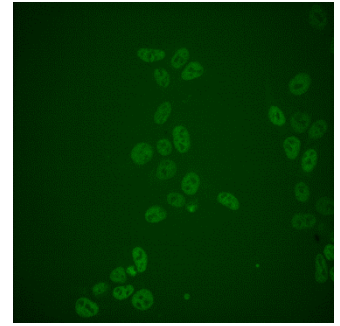

CTR9, Intron 1\_1  
Nucleus  
Human Protein Atlas:  
Nucleoplasm  
N\_id

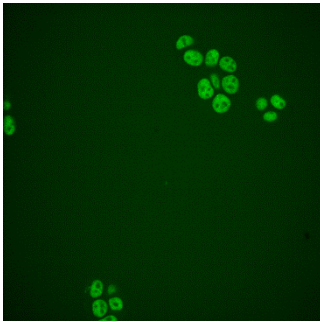

CTR9, Intron 1\_1  
Nucleus  
Human Protein Atlas:  
Nucleoplasm  
N\_id

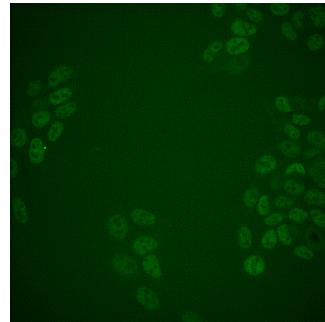

CTR9, Intron 1\_1  
Nucleus  
Human Protein Atlas:  
Nucleoplasm  
N\_id

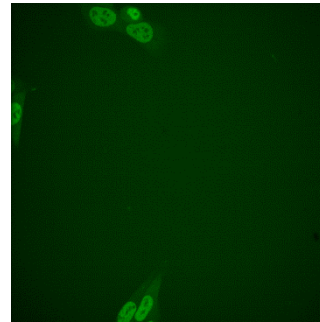

CUL4B, Intron 11\_1  
Cytoplasm, Nucleus  
Human Protein Atlas:  
Nucleoplasm  
C\_sim

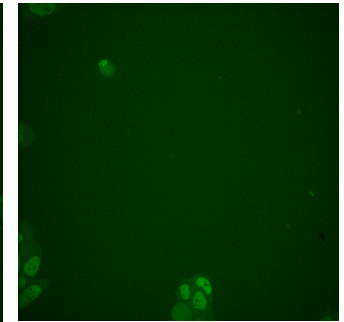

CUL4B, Intron 20\_1  
Cytoplasm, Nucleus  
Human Protein Atlas:  
Nucleoplasm  
C\_sim

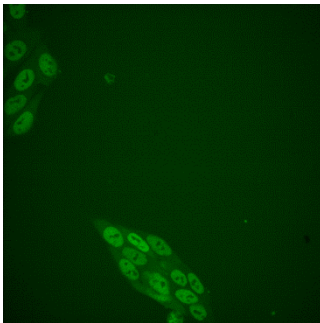

CUL4B, Intron 20\_1  
Cytoplasm, Nucleus  
Human Protein Atlas:  
Nucleoplasm  
C\_sim

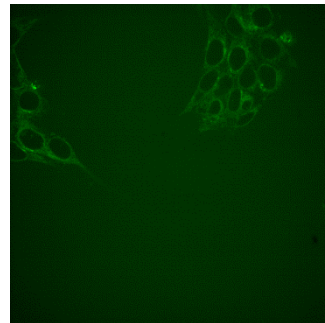

CYB5R3, Intron 2\_1  
ER  
Human Protein Atlas: ER  
ER\_id

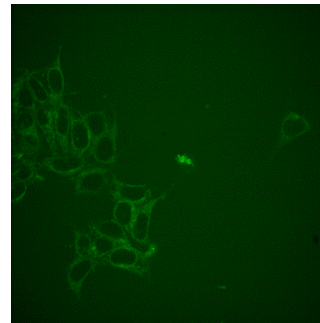

CYB5R3, Intron 2\_1  
ER  
Human Protein Atlas: ER  
ER\_id

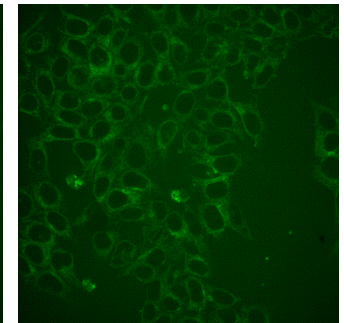

CYB5R3, Intron 2\_1  
ER  
Human Protein Atlas: ER  
ER\_id

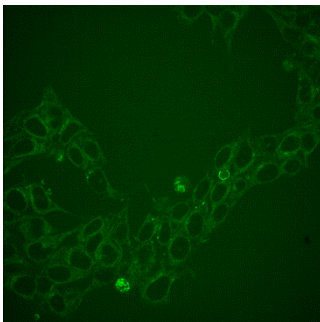

CYB5R3, Intron 2\_1  
ER  
Human Protein Atlas: ER  
ER\_id

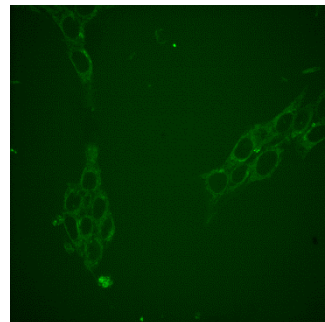

CYB5R3, Intron 2\_1  
ER  
Human Protein Atlas: ER  
ER\_id

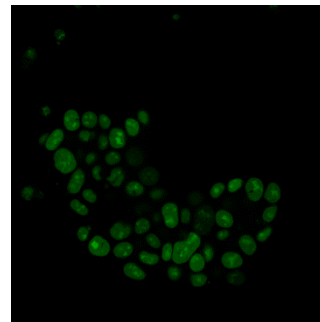

DAGLA, Intron 7\_1  
Nucleus  
Human Protein Atlas:  
unknown  
N\_unk

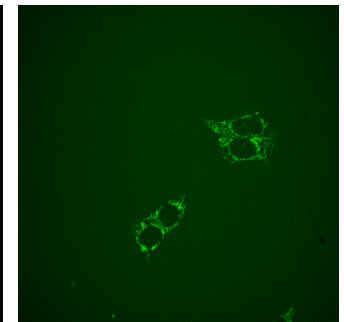

DARS2, Intron 9\_1  
Mitochondria  
Human Protein Atlas:  
Mitochondria, Nucleoplasm  
M\_sim

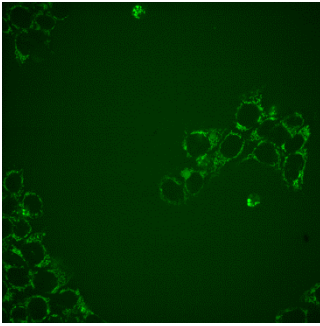

DARS2, Intron 9\_1  
Mitochondria  
Human Protein Atlas:  
Mitochondria, Nucleoplasm  
M\_sim

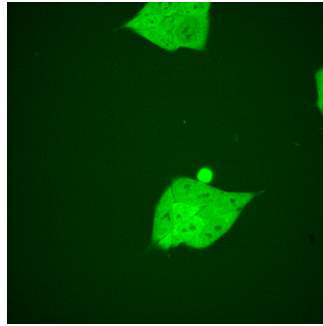

DDB1, Intron 18\_1  
Cytoplasm, Nucleus  
Human Protein Atlas:  
Nucleoplasm  
C\_sim

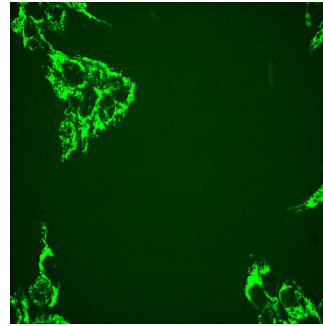

DLAT, Intron 4\_1  
Mitochondria  
Human Protein Atlas:  
Mitochondria  
M\_id

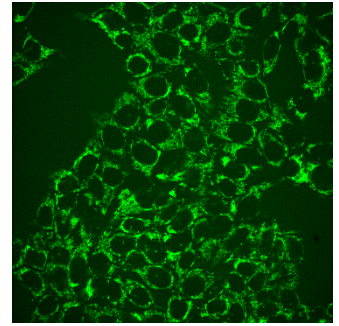

DLST, Intron 13\_1  
Mitochondria  
Human Protein Atlas:  
unknown  
M\_unk

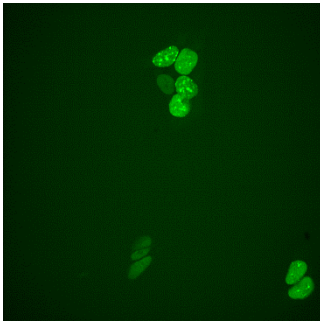

DNMT1, Intron 21\_1  
Nucleus  
Human Protein Atlas:  
Nucleoplasm  
N\_id

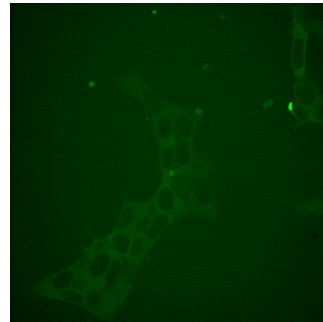

DOT1L, Intron 4\_1  
Cytoplasm, Nucleus  
Human Protein Atlas:  
Nucleoplasm  
C\_N

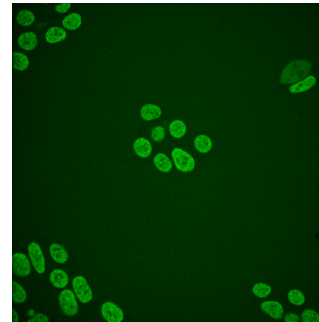

DPF2, Intron 5\_2  
Nucleus  
Human Protein Atlas:  
Nucleoplasm  
N\_id

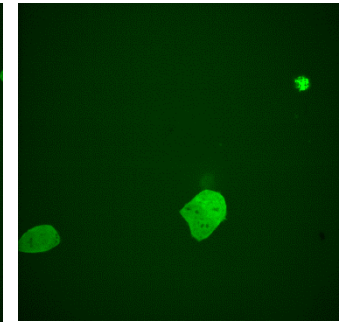

DPYSL2, Intron 7\_1  
Cytoplasm, Nucleus  
Human Protein Atlas: Cytosol,  
Plasma membrane  
C\_sim

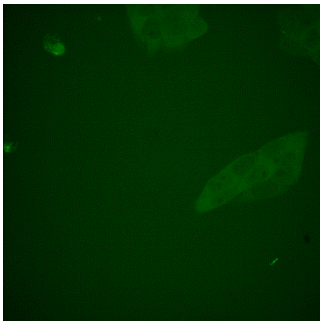

DPYSL2, Intron 7\_1  
Cytoplasm, Nucleus  
Human Protein Atlas: Cytosol,  
Plasma membrane  
C\_sim

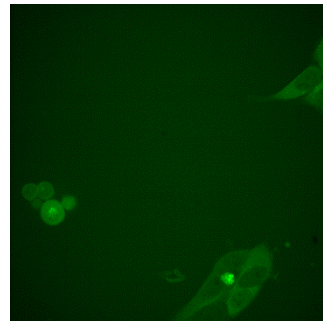

DPYSL5, Intron 11\_1  
Cytoplasm, Nucleus  
Human Protein Atlas:  
Nucleoplasm, Cytosol  
C\_id

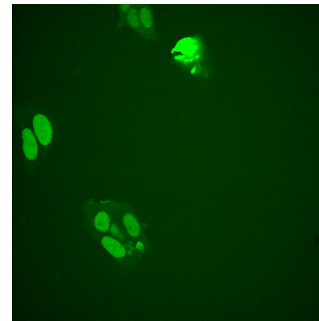

DR1, Intron 3\_3  
Nucleus, Cytoplasm  
Human Protein Atlas:  
Nucleoplasm  
N\_sim

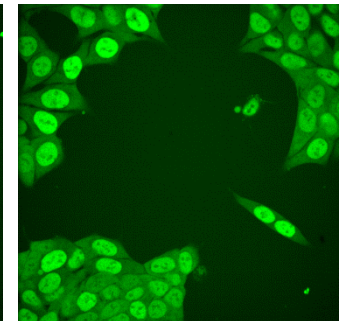

DR1, Intron 3\_3  
Nucleus, Cytoplasm  
Human Protein Atlas:  
Nucleoplasm  
N\_sim

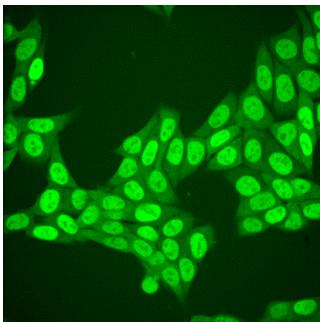

DR1, Intron 3\_3  
Nucleus, Cytoplasm  
Human Protein Atlas:  
Nucleoplasm  
N\_sim

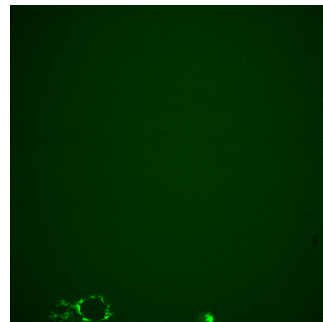

ECH1, Intron 9\_1  
Mitochondria  
Human Protein Atlas:  
Mitochondria  
M\_id

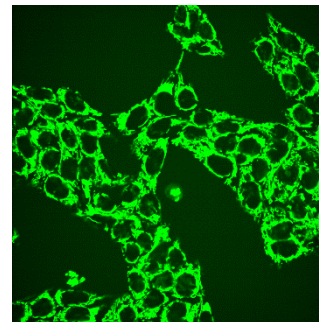

ECHS1, Intron 7\_2  
Mitochondria  
Human Protein Atlas:  
Mitochondria  
M\_id

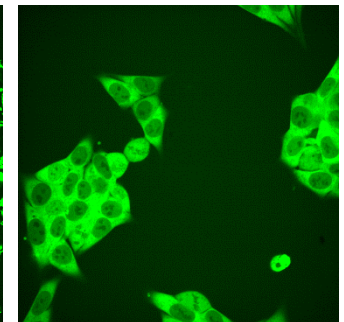

ENO1, Intron 6\_2  
Cytoplasm, Nucleus  
Human Protein Atlas: Plasma  
membrane, Cytosol  
C\_sim



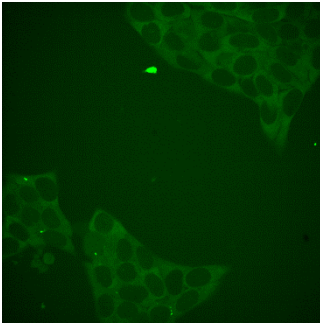

ERI1, Intron 1\_1  
Cytoplasm  
Human Protein Atlas:  
Microtubules, Vesicles  
C\_id

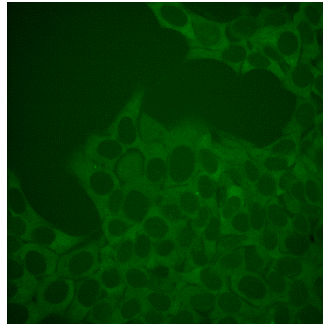

ERI1, Intron 1\_1  
Cytoplasm  
Human Protein Atlas:  
Microtubules, Vesicles  
C\_id

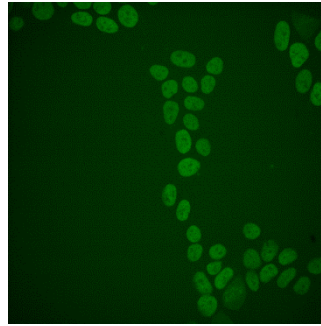

EZH2, Intron 4\_1  
Nucleus  
Human Protein Atlas:  
Nucleoplasm  
N\_id

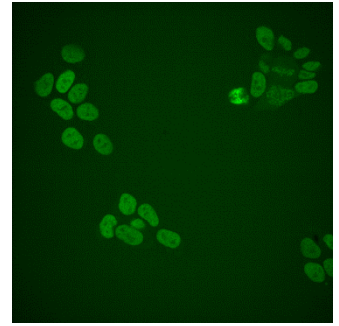

EZH2, Intron 4\_1  
Nucleus  
Human Protein Atlas:  
Nucleoplasm  
N\_id

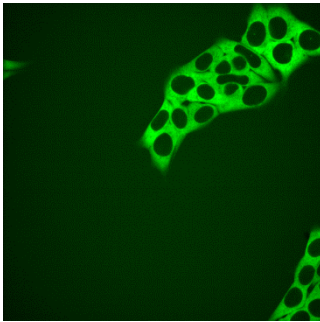

FASN, Intron 22\_1  
Cytoplasm  
Human Protein Atlas: Plasma  
membrane, Cytosol  
C\_id

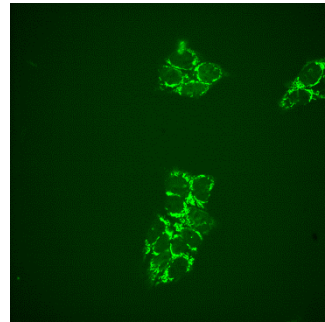

FH, Intron 3\_1  
Mitochondria, Nucleus,  
Cytoplasm  
Human Protein Atlas:  
Mitochondria, M\_sim

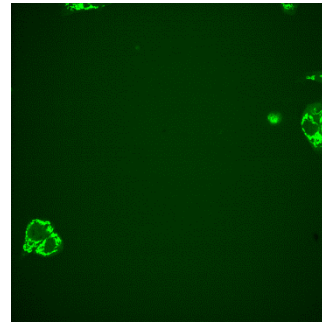

FH, Intron 5\_1  
Mitochondria, Nucleus,  
Cytoplasm  
Human Protein Atlas:  
Mitochondria, M\_sim

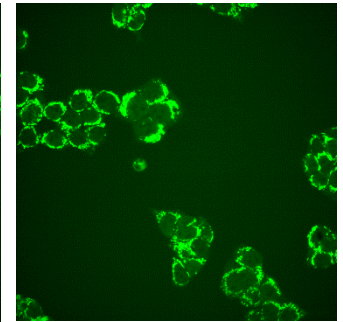

FH, Intron 8\_1  
Mitochondria, Nucleus,  
Cytoplasm  
Human Protein Atlas:  
Mitochondria, M\_sim

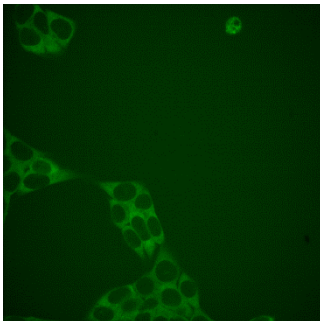

FMR1, Intron 8\_1  
Cytoplasm  
Human Protein Atlas: Cytosol  
C\_id

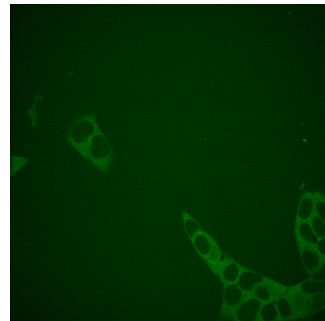

FMR1, Intron 8\_1  
Cytoplasm  
Human Protein Atlas: Cytosol  
C\_id

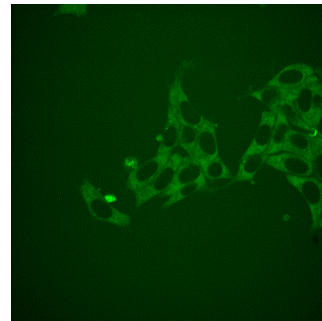

FMR1, Intron 12\_1  
Cytoplasm  
Human Protein Atlas: Cytosol  
C\_id

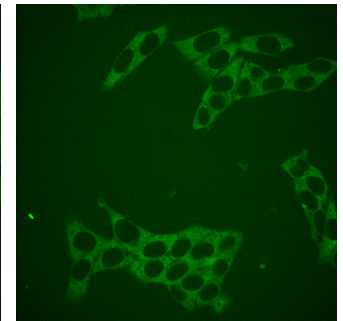

FMR1, Intron 12\_1  
Cytoplasm  
Human Protein Atlas: Cytosol  
C\_id

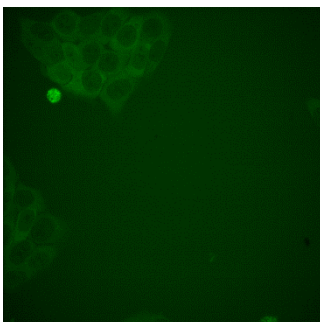

FN3K, Intron 4\_1  
Cytoplasm, Nucleus  
Human Protein Atlas:  
Mitochondria  
C\_dis

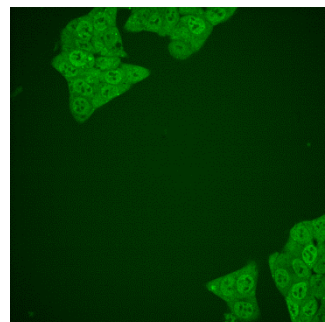

FUBP3, Intron 9\_1  
Cytoplasm, Nucleus  
Human Protein Atlas:  
Nucleoplasm, Cytosol  
C\_id

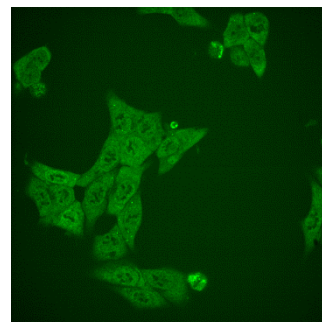

FUBP3, Intron 13\_1  
Cytoplasm, Nucleus  
Human Protein Atlas:  
Nucleoplasm, Cytosol  
C\_id

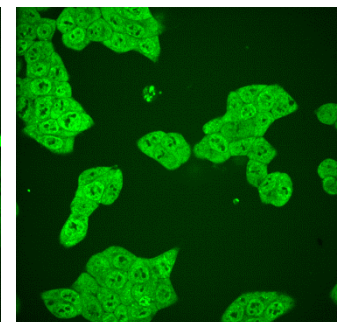

FUBP3, Intron 13\_1  
Cytoplasm, Nucleus  
Human Protein Atlas:  
Nucleoplasm, Cytosol  
C\_id

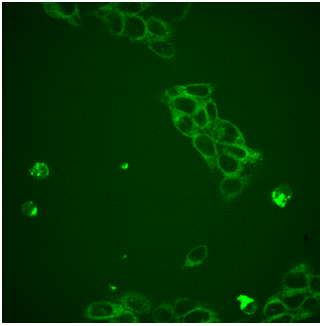

GANAB, Intron 20\_1  
ER  
Human Protein Atlas: ER  
ER\_id

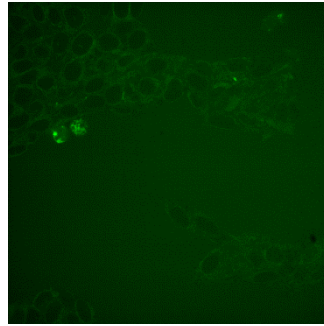

GANAB, Intron 21\_1  
ER  
Human Protein Atlas: ER  
ER\_id

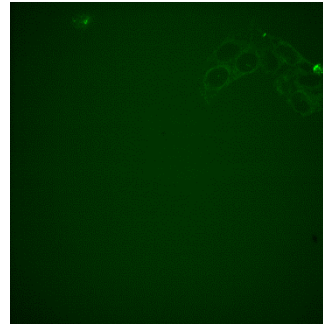

GANAB, Intron 21\_1  
ER  
Human Protein Atlas: ER  
ER\_id

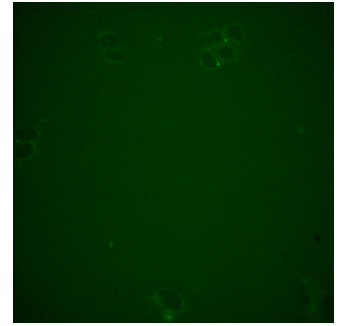

GANAB, Intron 21\_1  
ER  
Human Protein Atlas: ER  
ER\_id

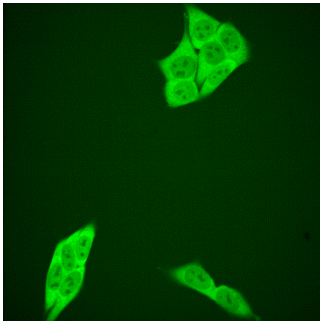

GAPDH, Intron 3\_2  
Cytoplasm, Nucleus  
Human Protein Atlas: Plasma  
membrane, Cytosol, Nuclear  
membrane, Vesicles, C\_id

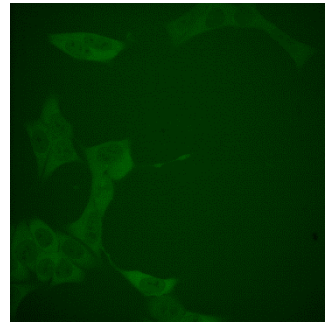

GAPDH, Intron 3\_2  
Cytoplasm, Nucleus  
Human Protein Atlas: Plasma  
membrane, Cytosol, Nuclear  
membrane, Vesicles, C\_id

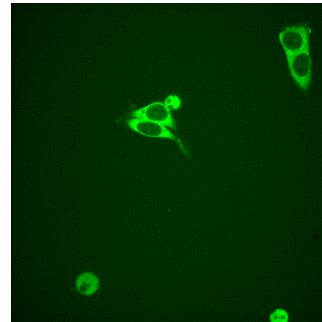

GARS, Intron 1\_1  
Cytoplasm, Nucleus  
Human Protein Atlas: Cytosol  
C\_sim

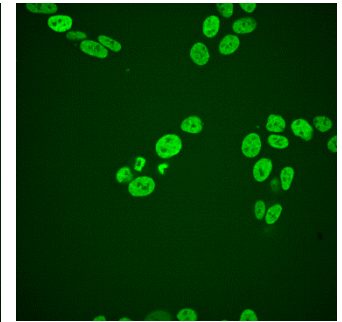

GATAD2A, Intron 7\_1  
Nucleus  
Human Protein Atlas:  
Nucleoplasm  
N\_id

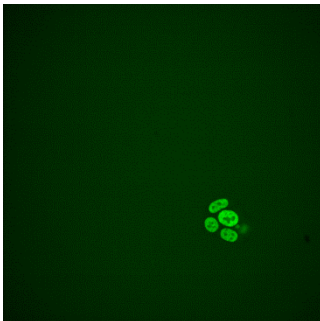

GATAD2A, Intron 7\_1  
Nucleus  
Human Protein Atlas:  
Nucleoplasm  
N\_id

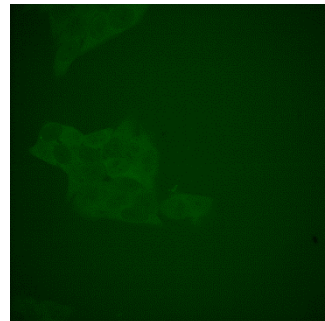

GCLM, Intron 1\_1  
Cytoplasm, Nucleus  
Human Protein Atlas:  
Nucleoplasm, Cytosol, Plasma  
membrane C\_id

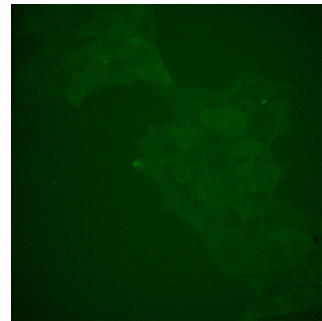

GCLM, Intron 2\_2  
Cytoplasm, Nucleus  
Human Protein Atlas:  
Nucleoplasm, Cytosol, Plasma  
membrane C\_id

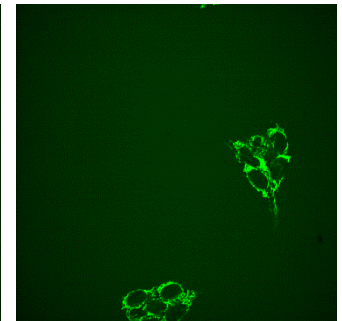

GCSH, Intron 2\_3  
Mitochondria  
Human Protein Atlas: Vesicles  
M\_dis

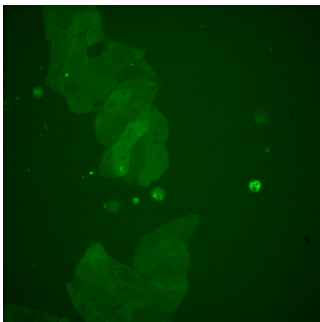

GLO1, Intron 1\_1  
Cytoplasm, Nucleus  
Human Protein Atlas:  
Nucleoplasm, Plasma  
membrane, Cytosol  
C\_id

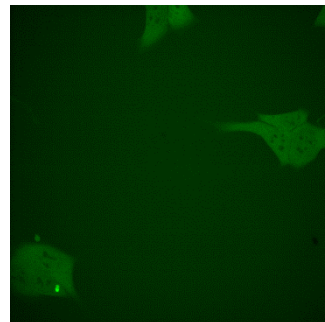

GLO1, Intron 1\_2  
Cytoplasm, Nucleus  
Human Protein Atlas:  
Nucleoplasm, Plasma  
membrane, Cytosol  
C\_id

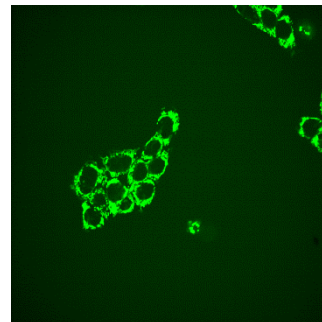

GLOD4, Intron 1\_1  
Mitochondria  
Human Protein Atlas: Cytosol,  
Nucleoplasm, Nucleoli  
M\_dis

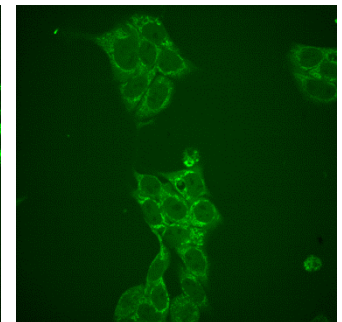

GLOD4, Intron 9\_1  
Mitochondria, Cytoplasm,  
Nucleus  
Human Protein Atlas: Cytosol,  
Nucleoplasm, Nucleoli  
M\_sim

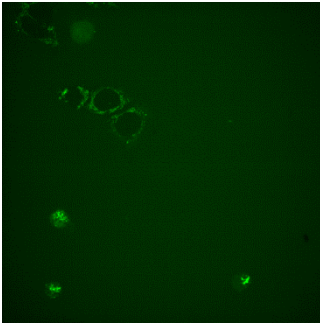

GLS, Intron 4\_1  
Mitochondria  
Human Protein Atlas:  
Mitochondria  
M\_id

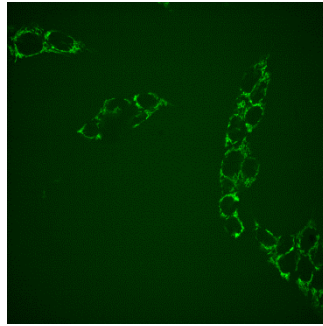

GLS, Intron 13\_1  
Mitochondria  
Human Protein Atlas:  
Mitochondria  
M\_id

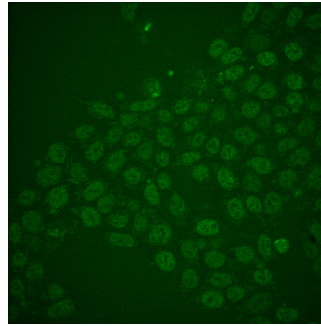

GLYR1, Intron 10\_1  
Nucleus, Mitochondria  
Human Protein Atlas:  
Nucleoplasm, Cytosol  
N\_sim

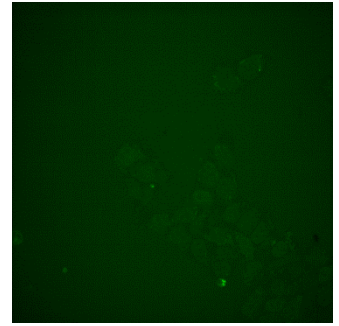

GLYR1, Intron 12\_1  
Nucleus, Mitochondria  
Human Protein Atlas:  
Nucleoplasm, Cytosol  
N\_sim

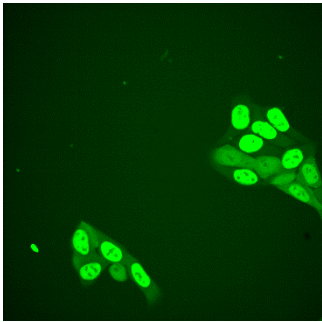

GMPS, Intron 7\_1  
Nucleus, Cytoplasm  
Human Protein Atlas: Cytosol  
N\_sim

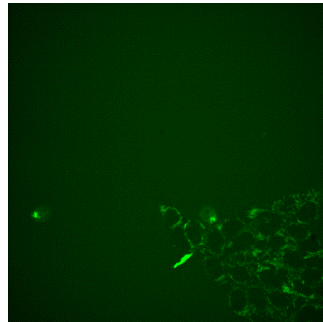

GPD2, Intron 2\_1  
Mitochondria  
Human Protein Atlas:  
unknown  
M\_unk

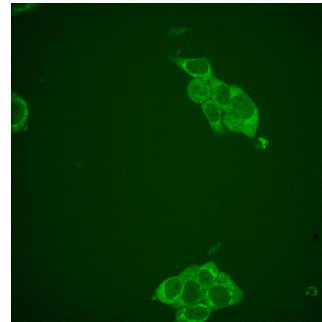

GSR, Intron 1\_1  
Mitochondria, Cytoplasm,  
Nucleus  
Human Protein Atlas: Cytosol,  
Plasma membrane, M\_dis

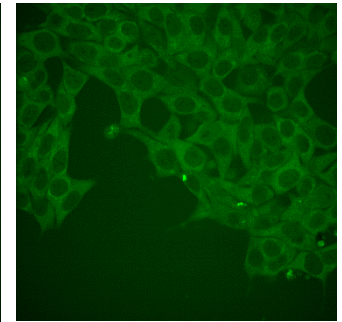

GSR, Intron 4\_1  
Mitochondria, Cytoplasm,  
Nucleus  
Human Protein Atlas:  
Cytosol, Plasma membrane  
M\_sim

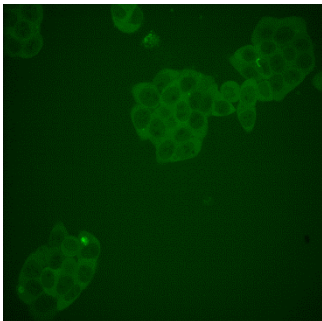

GSS, Intron 2\_1  
Cytoplasm, Nucleus  
Human Protein Atlas:  
Nucleoplasm  
C\_sim

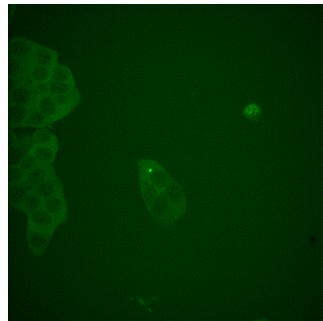

GSS, Intron 2\_1  
Cytoplasm, Nucleus  
Human Protein Atlas:  
Nucleoplasm  
C\_sim

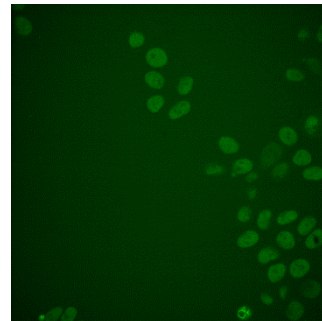

GTF3C4, Intron 1\_1  
Nucleus  
Human Protein Atlas:  
Nucleoplasm, Mitochondria  
N\_sim

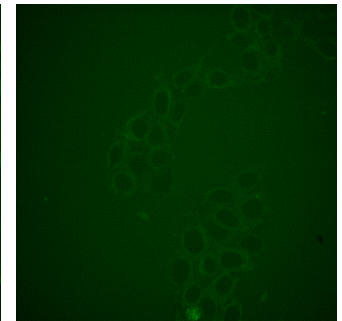

GUSB, Intron 1\_1  
ER  
Human Protein Atlas: Vesicles  
ER\_dis

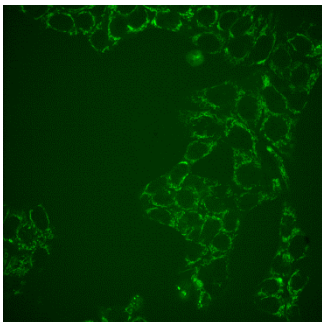

HADH, Intron 2\_1  
Mitochondria  
Human Protein Atlas:  
Mitochondria  
M\_id

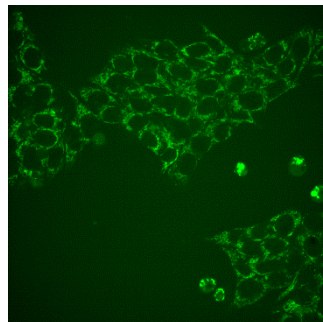

HADH, Intron 2\_1  
Mitochondria  
Human Protein Atlas:  
Mitochondria  
M\_id

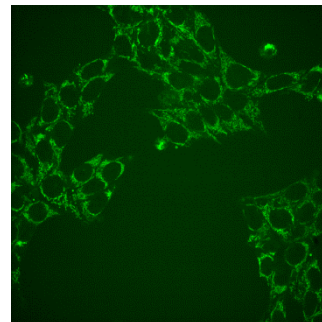

HADH, Intron 2\_1  
Mitochondria  
Human Protein Atlas:  
Mitochondria  
M\_id

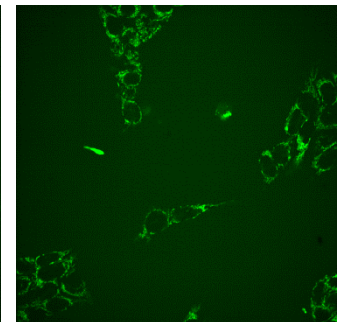

HADHA, Intron 14\_1  
Mitochondria  
Human Protein Atlas:  
Mitochondria  
M\_id

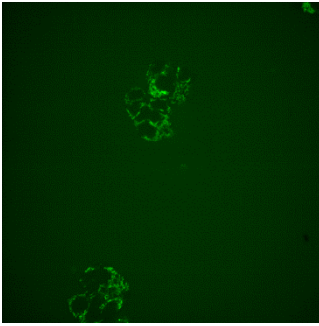

HADHA, Intron 15\_1  
Mitochondria  
Human Protein Atlas:  
Mitochondria  
M\_id

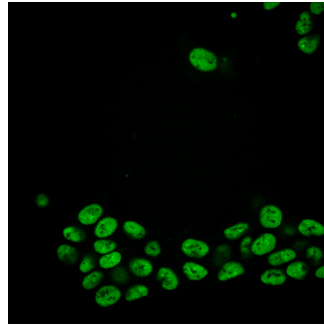

HCFC1, Intron 18\_1  
Nucleus  
Human Protein Atlas:  
Mitochondria, Nucleoplasm  
N\_sim

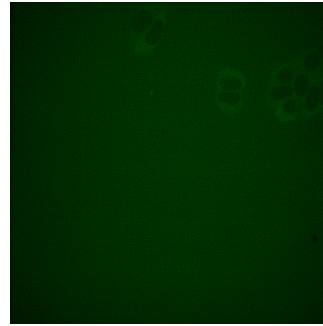

HDAC6, Intron 7\_1  
Cytoplasm  
Human Protein Atlas:  
Nucleoplasm  
C\_dis

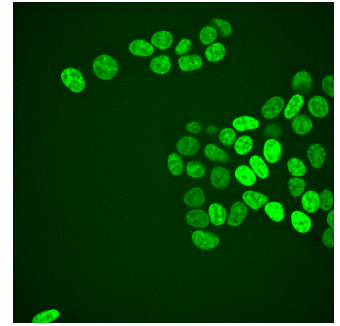

HMGA2, Intron 1\_1  
Nucleus  
Human Protein Atlas:  
Nucleoplasm, Nucleoli  
N\_id

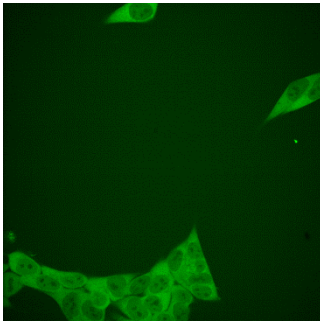

HSD17B10, Intron 2\_1  
Cytoplasm, Nucleus  
Human Protein Atlas:  
unknown  
C\_unk

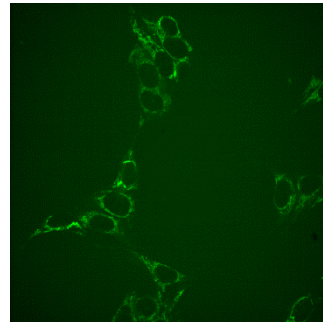

HSD17B10, Intron 4\_1  
Mitochondria  
Human Protein Atlas:  
unknown  
M\_unk

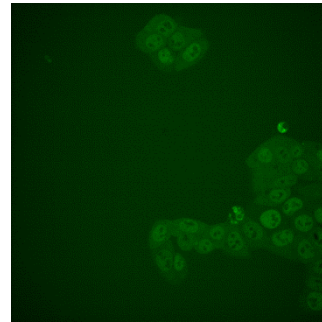

HUWE1, Intron 8\_1  
Nucleus, Cytoplasm  
Human Protein Atlas:  
Nucleoplasm, Cytosol  
N\_id

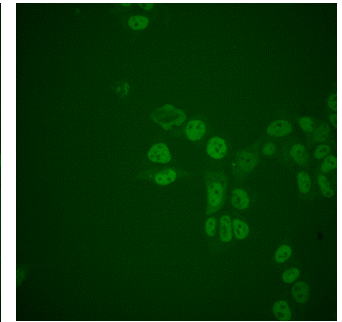

HUWE1, Intron 12\_1  
Nucleus, Cytoplasm  
Human Protein Atlas:  
Nucleoplasm, Cytosol  
N\_id

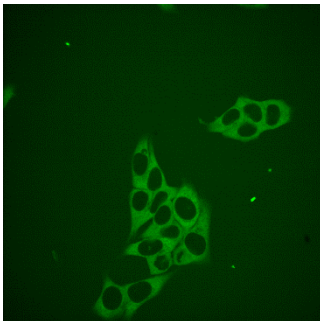

IARS, Intron 1\_1  
Cytoplasm  
Human Protein Atlas: Cytosol  
C\_id

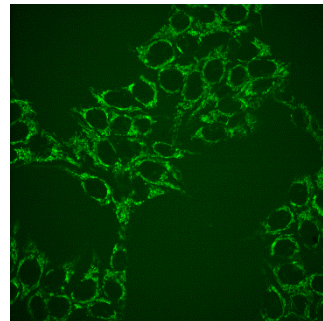

IARS2, Intron 1\_1  
Mitochondria  
Human Protein Atlas:  
Mitochondria  
M\_id

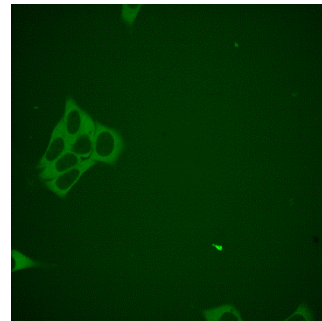

IDE, Intron 13\_1  
Cytoplasm, Nucleus  
Human Protein Atlas:  
unknown  
C\_unk

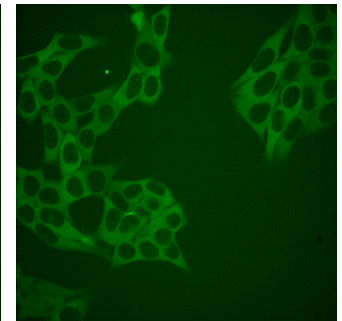

IDE, Intron 13\_1  
Cytoplasm, Nucleus  
Human Protein Atlas:  
unknown  
C\_unk

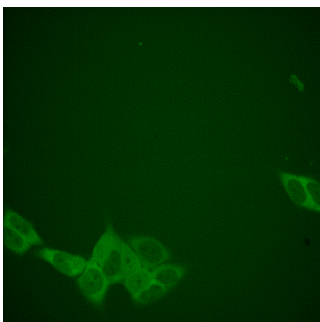

IDH1, Intron 4\_2  
Cytoplasm, Nucleus  
Human Protein Atlas: Nuclear  
bodies, Cytosol  
C\_id

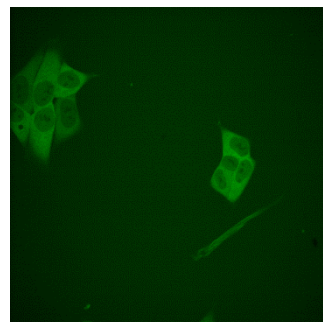

IDH1, Intron 4\_2  
Cytoplasm, Nucleus  
Human Protein Atlas: Nuclear  
bodies, Cytosol  
C\_id

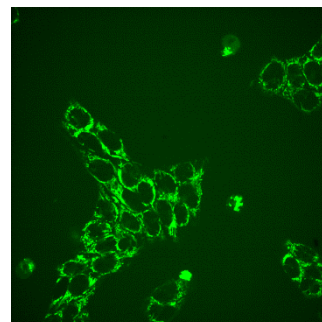

IDH3A, Intron 2\_1  
Mitochondria  
Human Protein Atlas:  
Mitochondria  
M\_id

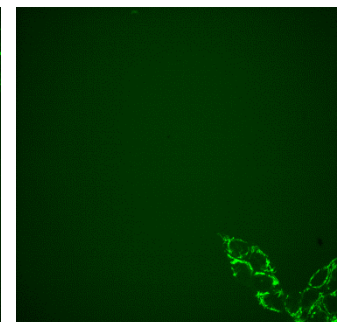

IDH3A, Intron 2\_1  
Mitochondria  
Human Protein Atlas:  
Mitochondria  
M\_id

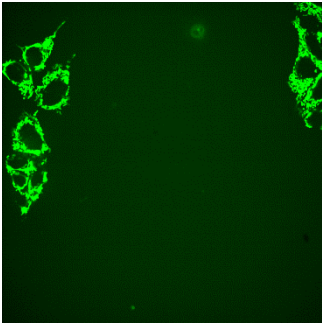

IDH3B, Intron 2\_1  
Mitochondria  
Human Protein Atlas:  
Mitochondria  
M\_id

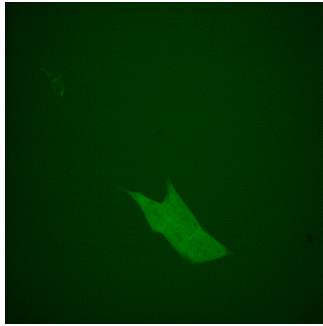

IDI1, Intron 4\_3  
Cytoplasm, Nucleus  
Human Protein Atlas:  
unknown  
C\_unk

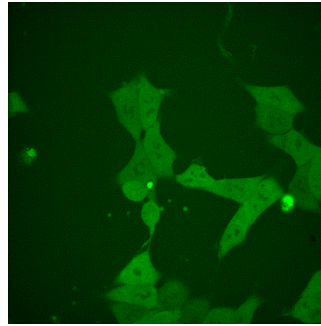

IDI1, Intron 4\_3  
Cytoplasm, Nucleus  
Human Protein Atlas:  
unknown  
C\_unk

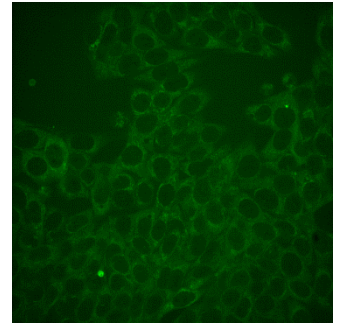

IDI1, Intron 4\_3  
Cytoplasm, Nucleus,  
Mitochondria  
Human Protein Atlas:  
unknown, C\_unk

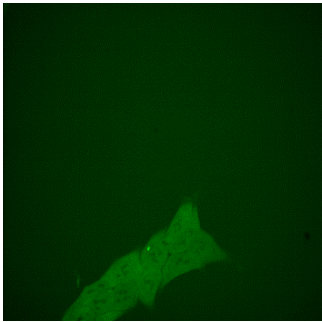

IDI1, Intron 4\_3  
Cytoplasm, Nucleus  
Human Protein Atlas:  
unknown  
C\_unk

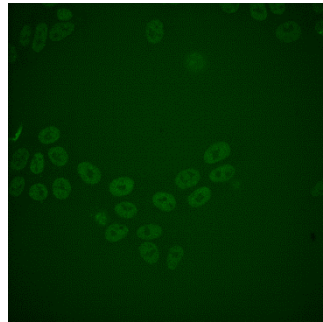

ING3, Intron 11\_1  
Nucleus  
Human Protein Atlas:  
Nucleoplasm  
N\_id

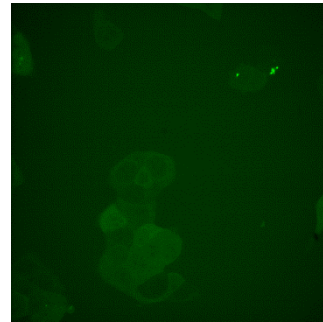

ITGAV, Intron 3\_1  
Cytoplasm, Nucleus  
Human Protein Atlas: Focal  
adhesion sites, Cytosol  
C\_sim

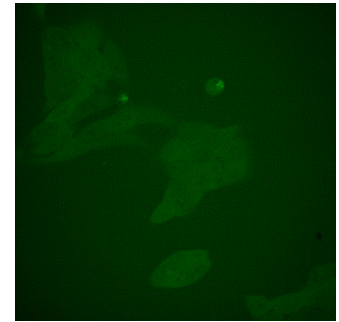

ITPA, Intron 1\_1  
Cytoplasm, Nucleus  
Human Protein Atlas: Cytosol,  
Nucleoplasm, Nuclear bodies  
C\_id

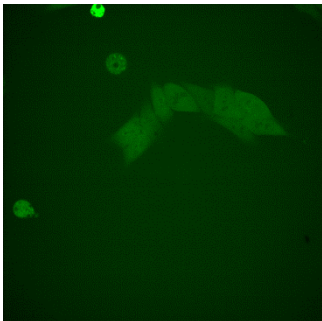

ITPA, Intron 1\_2  
Cytoplasm, Nucleus  
Human Protein Atlas: Cytosol,  
Nucleoplasm, Nuclear bodies  
C\_id

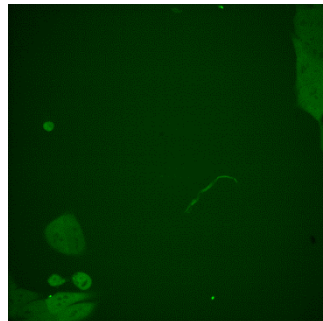

ITPA, Intron 1\_2  
Cytoplasm, Nucleus  
Human Protein Atlas: Cytosol,  
Nucleoplasm, Nuclear bodies  
C\_id

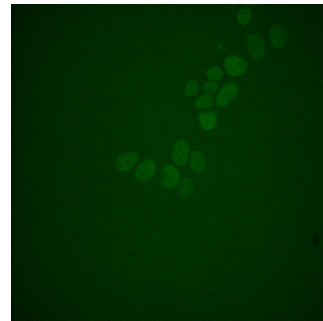

JADE3, Intron 3\_1  
Nucleus  
Human Protein Atlas:  
Nucleoplasm, Nucleoli  
N\_id

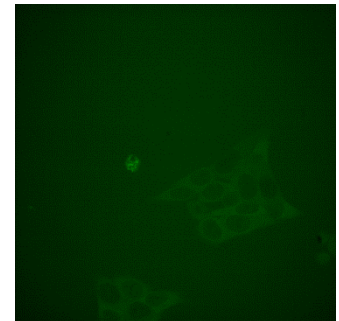

JMJD8, Intron 8\_1  
Cytoplasm, Nucleus  
Human Protein Atlas:  
unknown  
C\_unk

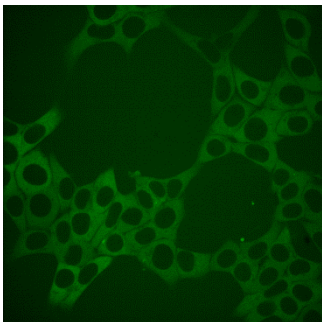

KARS, Intron 7\_1  
Cytoplasm  
Human Protein Atlas: Cytosol  
C\_id

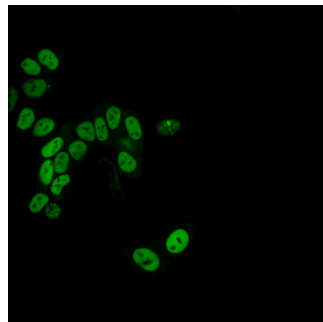

KDM1A, Intron 6\_1  
Nucleus, Cytoplasm  
Human Protein Atlas:  
Nucleoplasm, Cytosol  
N\_id

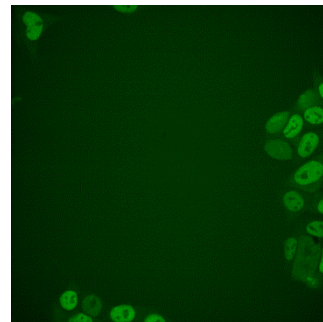

KDM1A, Intron 8\_1  
Nucleus, Cytoplasm  
Human Protein Atlas:  
Nucleoplasm, Cytosol  
N\_id

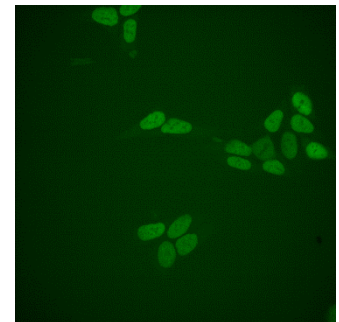

KDM3B, Intron 6\_1  
Nucleus, Cytoplasm  
Human Protein Atlas:  
Nucleoplasm  
N\_sim

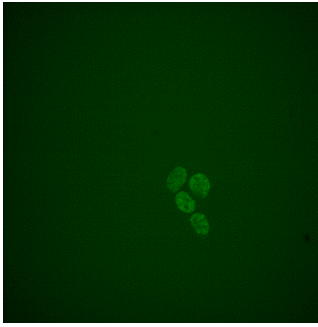

KDM6A, Intron 13\_1  
Nucleus  
Human Protein Atlas:  
Nucleoplasm, Nucleoli  
N\_id

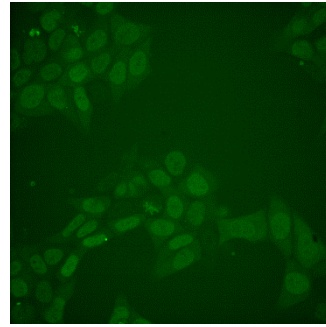

KMT5A, Intron 2\_1  
Nucleus, Cytoplasm  
Human Protein Atlas:  
Nucleoplasm, Cytosol  
N\_id

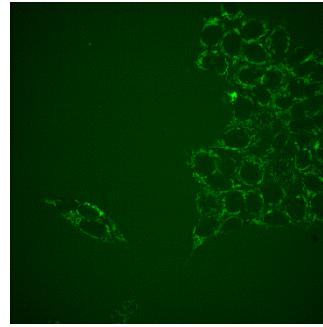

LARS2, Intron 4\_1  
Mitochondria  
Human Protein Atlas:  
Mitochondria, Nucleoplasm  
M\_sim

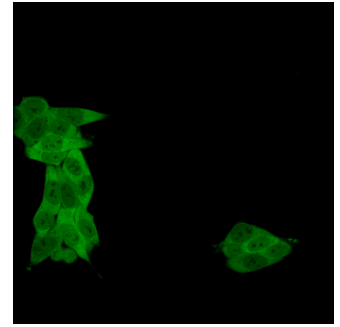

LDHB, Intron 2\_1  
Cytoplasm, Nucleus  
Human Protein Atlas: Cytosol  
C\_sim

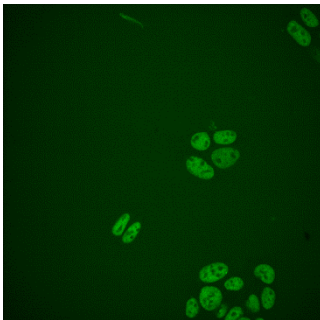

LEO1, Intron 11\_1  
Nucleus  
Human Protein Atlas:  
Nucleoplasm, Nucleoli fibrillary  
center, Centrosome, N\_sim

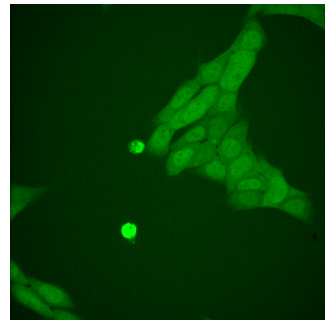

LTA4H, Intron 15\_1  
Nucleus, Cytoplasm  
Human Protein Atlas:  
Nucleoplasm, Cytosol  
N\_id

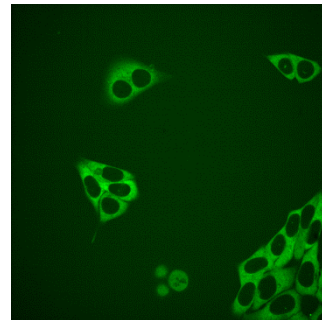

MARS, Intron 12\_1  
Cytoplasm  
Human Protein Atlas: Cytosol  
C\_id

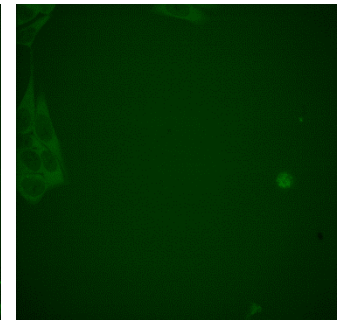

MAT2B, Intron 6\_1  
Cytoplasm, Nucleus  
Human Protein Atlas: Plasma  
membrane  
C\_dis

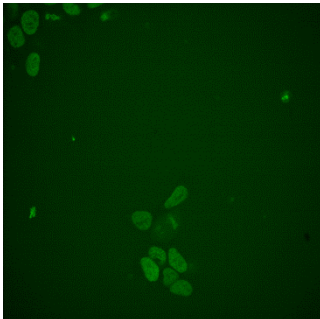

MEAF6, Intron 3\_2  
Nucleus  
Human Protein Atlas:  
unknown  
N\_unk

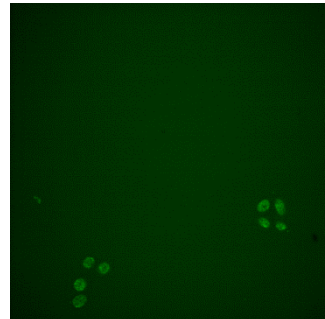

MEN1, Intron 8\_1  
Nucleus  
Human Protein Atlas:  
Nucleoplasm, Cytosol  
N\_sim

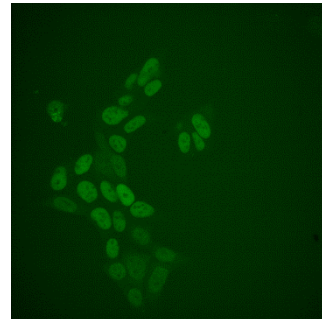

METTL14, Intron 1\_1  
Nucleus, Cytoplasm  
Human Protein Atlas:  
Nucleoplasm  
N\_sim

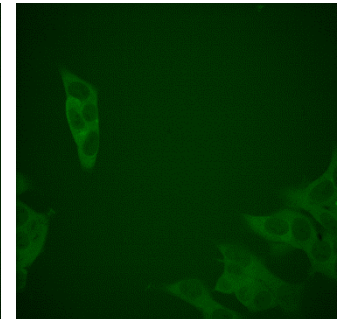

MMADHC, Intron 2\_1  
Cytoplasm, Nucleus  
Human Protein Atlas:  
unknown  
C\_unk

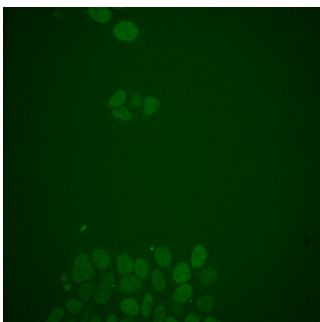

MORF4L1, Intron 2\_1  
Nucleus  
Human Protein Atlas: Nuclear  
speckles  
N\_id

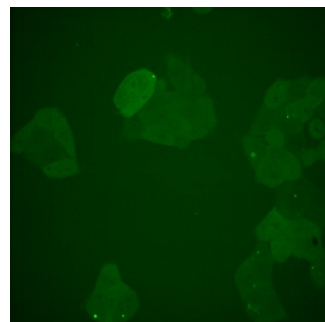

MSR1, Intron 4\_2  
Cytoplasm, Nucleus  
Human Protein Atlas:  
unknown  
C\_unk

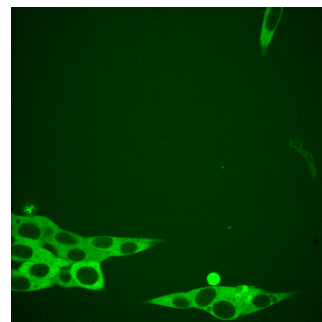

MTHFD1, Intron 22\_2  
Cytoplasm, Nucleus  
Human Protein Atlas: Cytosol  
C\_sim

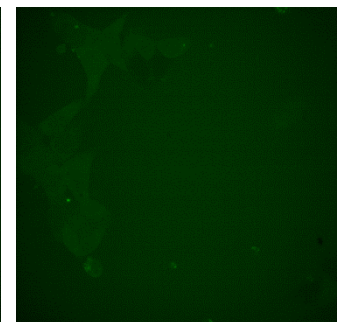

NAA40, Intron 1\_2  
Cytoplasm, Nucleus  
Human Protein Atlas: Nuclear  
bodies  
C\_sim

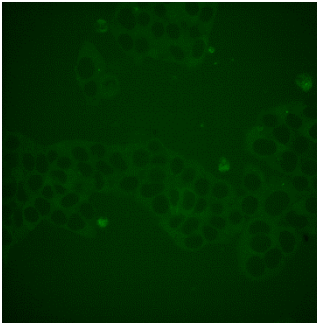

NAMPT, Intron 3\_1  
Cytoplasm  
Human Protein Atlas: Nuclear speckles, Cell junctions  
C\_dis

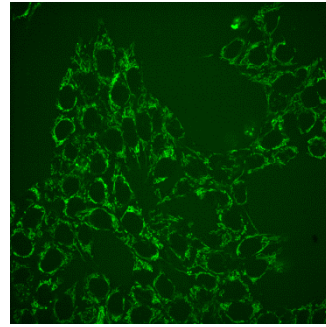

NDUFA10, Intron 7\_1  
Mitochondria  
Human Protein Atlas: Mitochondria  
M\_id

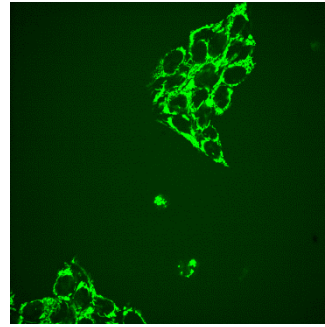

NDUFA10, Intron 9\_1  
Mitochondria  
Human Protein Atlas: Mitochondria  
M\_id

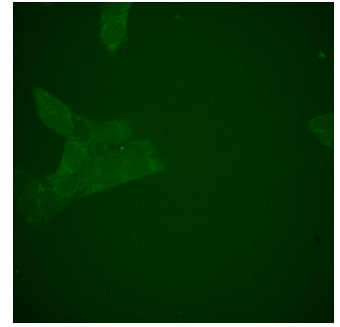

NDUF8, Intron 1\_1  
Mitochondria, Nucleus, Cytoplasm  
Human Protein Atlas: Mitochondria, M\_sim

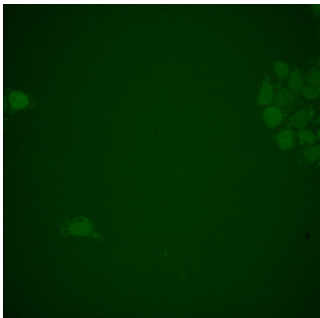

NDUF55, Intron 2\_1  
Nucleus, Mitochondria  
Human Protein Atlas: unknown  
N\_unk

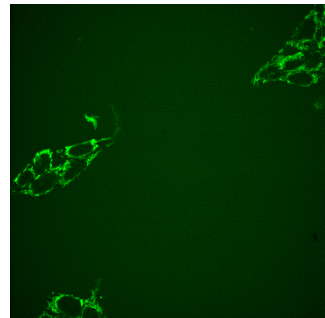

NDUF56, Intron 2\_1  
Mitochondria  
Human Protein Atlas: unknown  
M\_unk

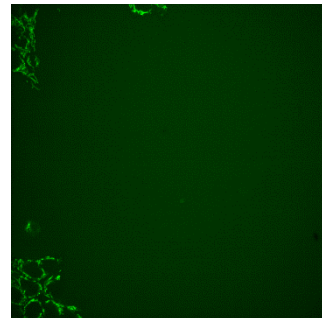

NDUF56, Intron 2\_1  
Mitochondria  
Human Protein Atlas: unknown  
M\_unk

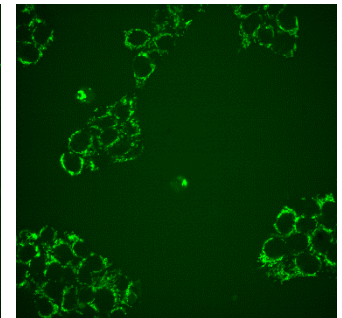

NDUF56, Intron 2\_2  
Mitochondria  
Human Protein Atlas: unknown  
M\_unk

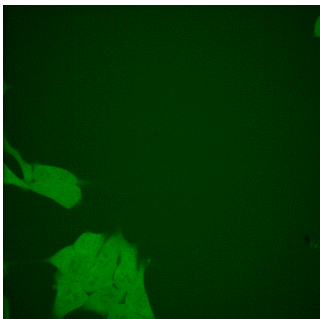

NDUFV2, Intron 1\_1  
Cytoplasm, Nucleus  
Human Protein Atlas: Mitochondria  
C\_dis

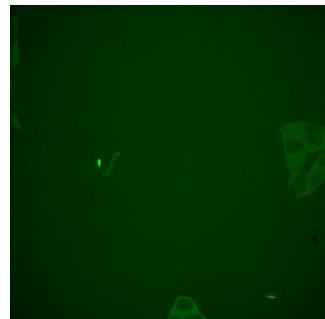

NME1, Intron 3\_2  
Cytoplasm, Nucleus  
Human Protein Atlas: Cytosol, Nucleoplasm, Plasma membrane, C\_id

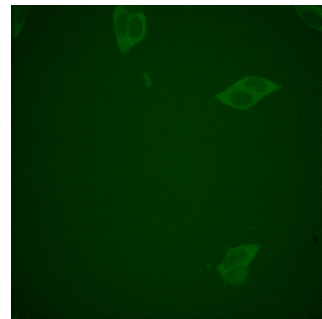

NME1, Intron 3\_2  
Cytoplasm, Nucleus  
Human Protein Atlas: Cytosol, Nucleoplasm, Plasma membrane, C\_id

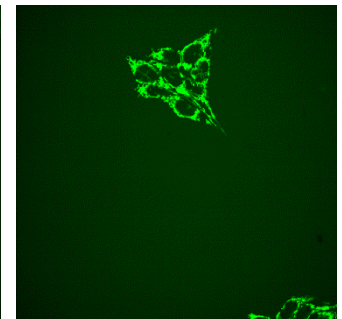

NNT, Intron 9\_1  
Mitochondria  
Human Protein Atlas: Mitochondria  
M\_id

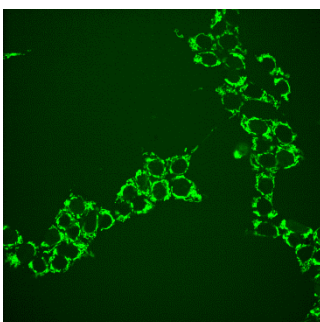

NNT, Intron 21\_1  
Mitochondria  
Human Protein Atlas: Mitochondria  
M\_id

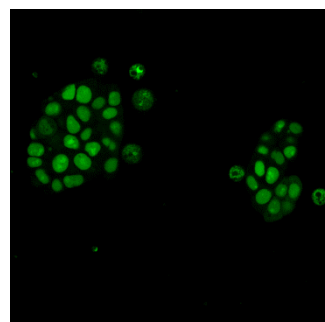

NSUN2, Intron 1\_1  
Nucleus  
Human Protein Atlas: Nucleoplasm  
N\_id

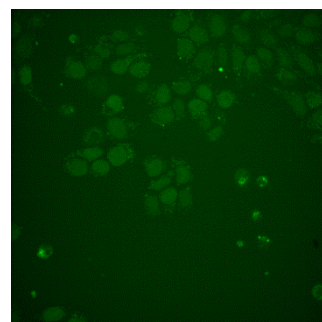

NSUN2, Intron 4\_1  
Nucleus, Mitochondria  
Human Protein Atlas: Nucleoplasm  
N\_sim

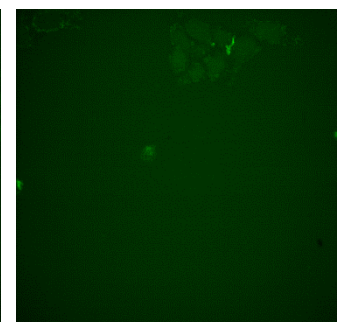

NSUN2, Intron 16\_1  
Nucleus, Mitochondria  
Human Protein Atlas: Nucleoplasm  
N\_sim

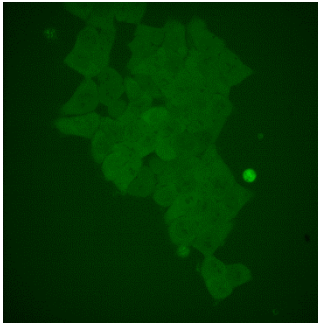

NT5C3B, Intron 1\_1  
Cytoplasm, Nucleus  
Human Protein Atlas:  
unknown  
C\_unk

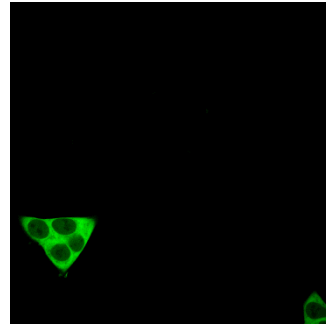

NUDT5, Intron 2\_2  
Cytoplasm, Nucleus  
Human Protein Atlas:  
Vesicles, Nucleoplasm,  
Centrosome, C\_sim

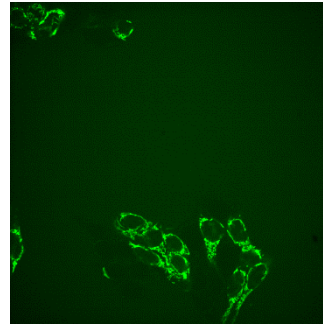

NUDT12, Intron 6\_2  
Mitochondria  
Human Protein Atlas:  
unknown  
M\_unk

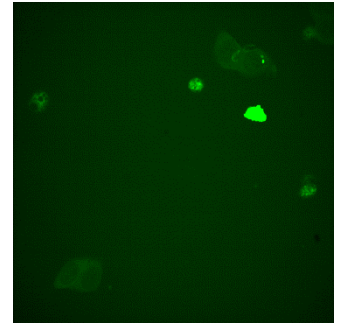

NXN, Intron 3\_1  
Cytoplasm, Nucleus  
Human Protein Atlas: Golgi,  
Cytosol  
C\_sim

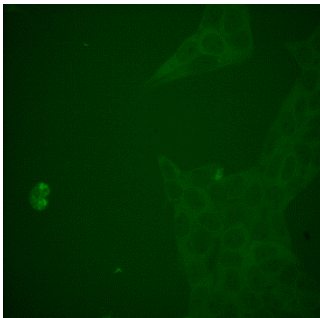

NXN, Intron 7\_1  
Cytoplasm, Nucleus  
Human Protein Atlas: Golgi,  
Cytosol  
C\_sim

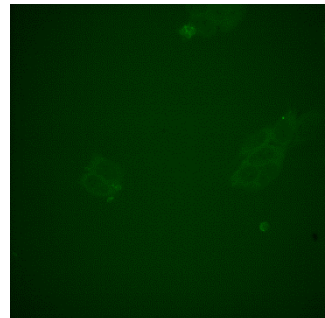

NXN, Intron 7\_1  
Cytoplasm, Nucleus  
Human Protein Atlas: Golgi,  
Cytosol  
C\_sim

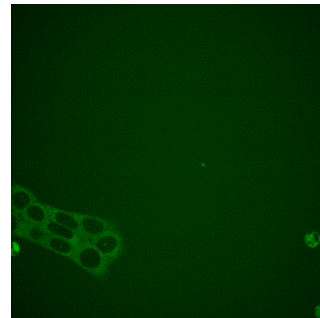

OAS3, Intron 15\_1  
Cytoplasm  
Human Protein Atlas:  
Nucleoplasm, Cytosol, Plasma  
membrane, C\_sim

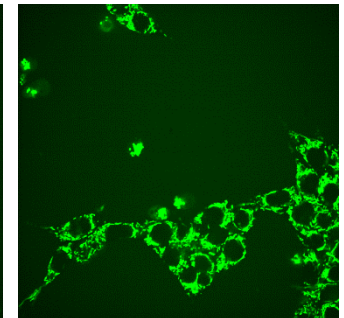

OAT, Intron 6\_1  
Mitochondria  
Human Protein Atlas:  
Mitochondria, Nucleoplasm  
M\_sim

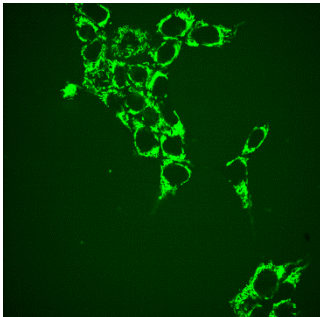

OAT, Intron 6\_1  
Mitochondria  
Human Protein Atlas:  
Mitochondria, Nucleoplasm  
M\_sim

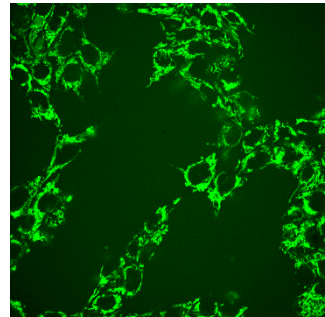

OAT, Intron 6\_1  
Mitochondria  
Human Protein Atlas:  
Mitochondria, Nucleoplasm  
M\_sim

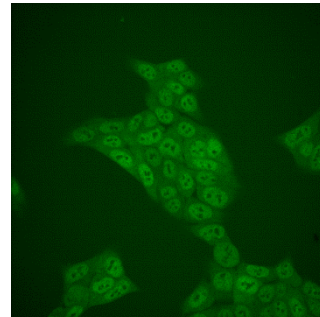

OGT, Intron 3\_1  
Nucleus, Cytoplasm  
Human Protein Atlas:  
Nucleoplasm, Plasma  
membrane, N\_id

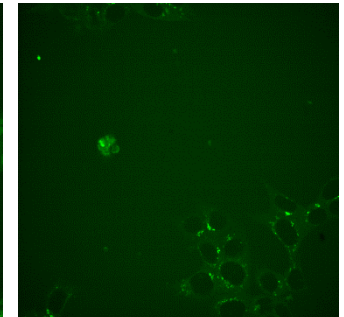

OSBPL11, Intron 12\_1  
Cytoplasm, Golgi  
Human Protein Atlas:  
Nucleoplasm, Golgi  
C\_sim

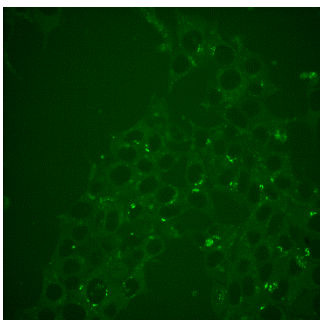

OSBPL11, Intron 12\_1  
Cytoplasm, Golgi  
Human Protein Atlas:  
Nucleoplasm, Golgi  
C\_sim

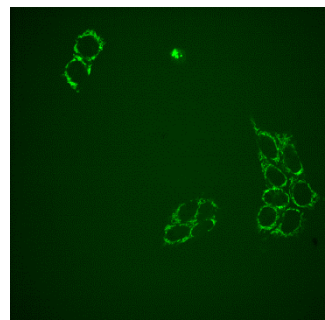

OXA1L, Intron 1\_1  
Mitochondria  
Human Protein Atlas:  
Mitochondria  
M\_id

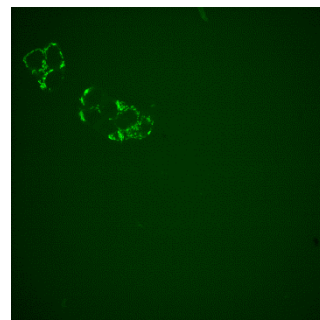

OXA1L, Intron 1\_1  
Mitochondria  
Human Protein Atlas:  
Mitochondria  
M\_id

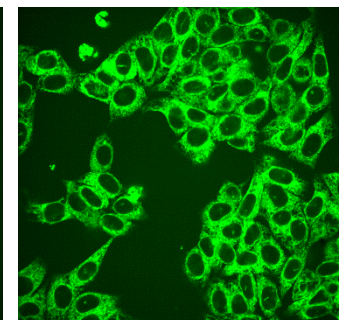

P4HB, Intron 6\_1  
ER  
Human Protein Atlas: ER,  
secreted  
ER\_id



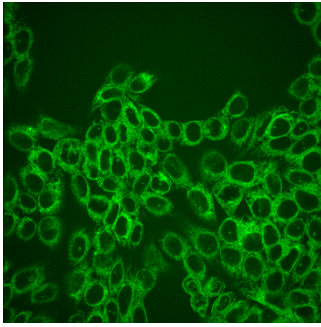

P4HB, Intron 6\_1  
ER  
Human Protein Atlas: ER, secreted  
ER\_id

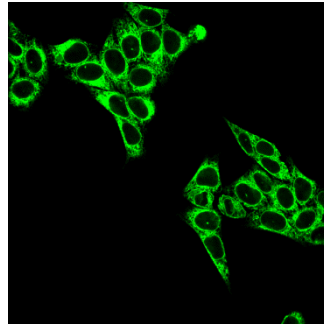

P4HB, Intron 9\_1  
ER  
Human Protein Atlas: ER, secreted  
ER\_id

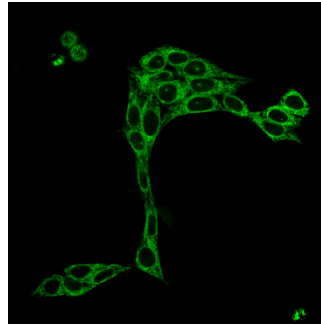

P4HB, Intron 10\_1  
ER  
Human Protein Atlas: ER, secreted  
ER\_id

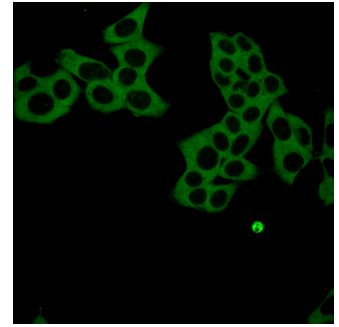

PAICS, Intron 7\_1  
Cytoplasm  
Human Protein Atlas: Cytosol  
C\_id

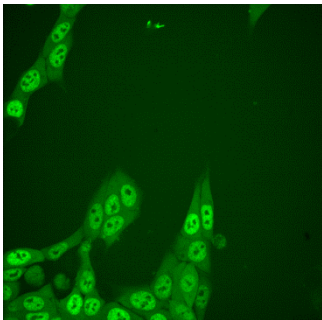

PARK7, Intron 4\_2  
Nucleus, Cytoplasm  
Human Protein Atlas: Nucleoplasm, Cytosol  
N\_id

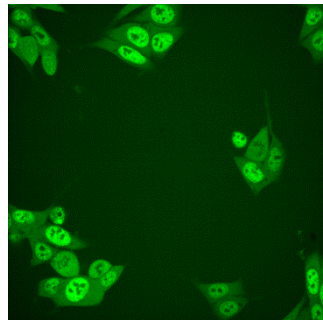

PARK7, Intron 4\_2  
Nucleus, Cytoplasm  
Human Protein Atlas: Nucleoplasm, Cytosol  
N\_id

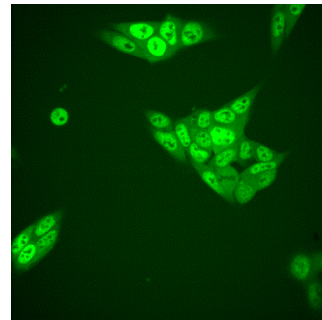

PARK7, Intron 4\_2  
Nucleus, Cytoplasm  
Human Protein Atlas: Nucleoplasm, Cytosol  
N\_id

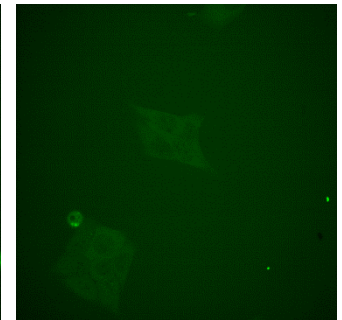

PCGF6, Intron 1\_1  
Cytoplasm, Nucleus  
Human Protein Atlas: unknown  
C\_unk

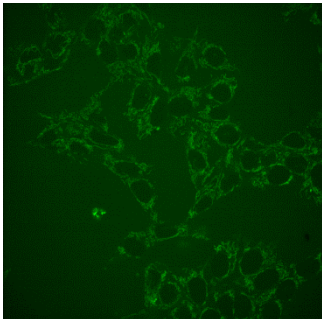

PDE12, Intron 1\_2  
Mitochondria  
Human Protein Atlas: unknown  
M\_unk

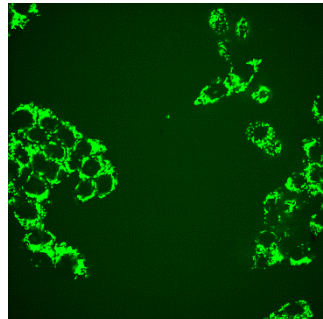

PDHA1, Intron 3\_1  
Mitochondria  
Human Protein Atlas: Mitochondria  
M\_id

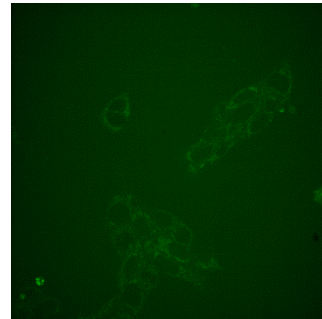

PDSS1, Intron 1\_1  
Mitochondria  
Human Protein Atlas: Cytosol  
M\_dis

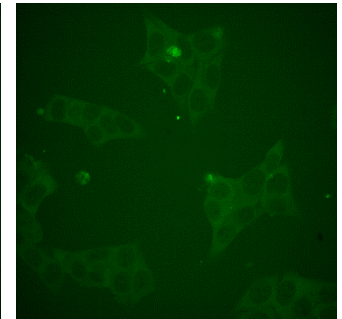

PFKL, Intron 12\_1  
Cytoplasm, Nucleus  
Human Protein Atlas: unknown  
C\_unk

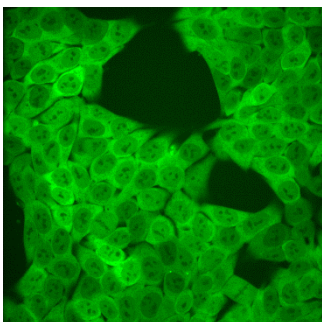

PGAM1, Intron 2\_3  
Cytoplasm, Nucleus  
Human Protein Atlas: Nucleoplasm  
C\_sim

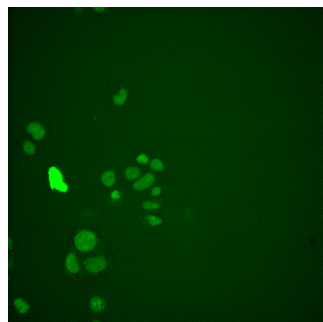

PHF8, Intron 21\_1  
Nucleus  
Human Protein Atlas: Nucleoplasm  
N\_id

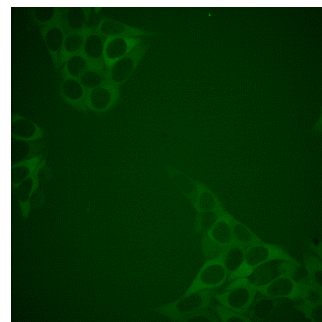

PHGDH, Intron 10\_1  
Cytoplasm, Nucleus  
Human Protein Atlas: Plasma membrane, Cytosol, Nucleoplasm, C\_id

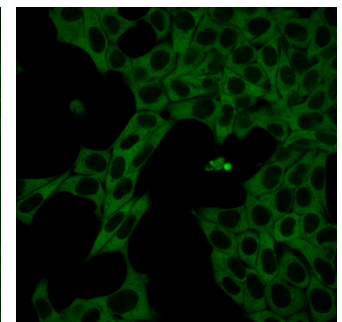

PKM, Intron 3\_1  
Cytoplasm  
Human Protein Atlas: Cytosol  
C\_id

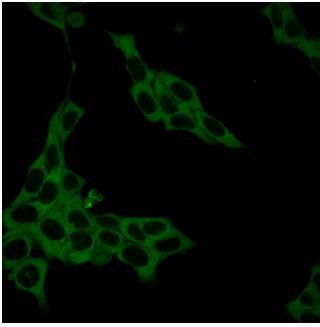

PKM, Intron 3\_1  
Cytoplasm  
Human Protein Atlas: Cytosol  
C\_id

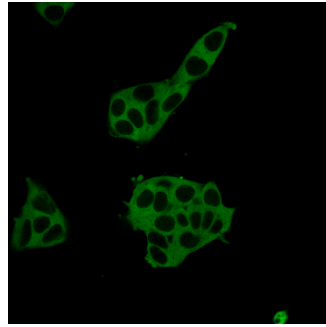

PKM, Intron 7\_1  
Cytoplasm  
Human Protein Atlas: Cytosol  
C\_id

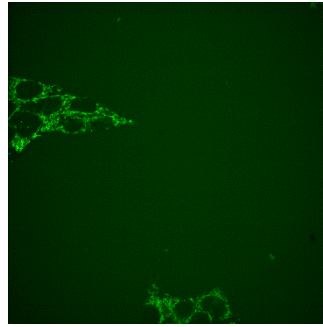

PLCB1, Intron 2\_1  
Mitochondria  
Human Protein Atlas: Plasma  
membrane  
M\_dis

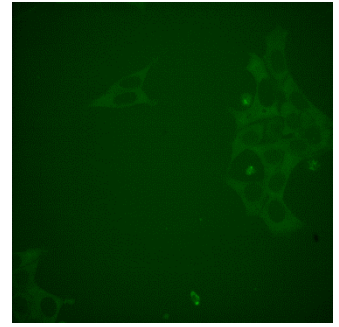

PLCB3, Intron 1\_1  
Cytoplasm  
Human Protein Atlas:  
Nucleoplasm  
C\_dis

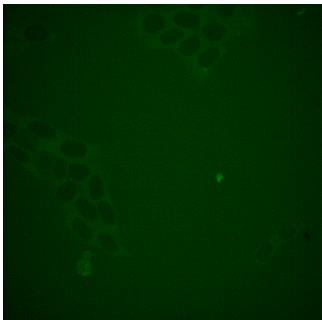

PLCG1, Intron 25\_1  
Cytoplasm  
Human Protein Atlas: Cytosol  
C\_id

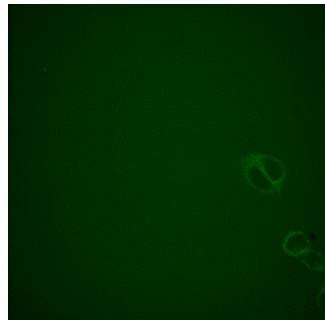

PLOD1, Intron 7\_1  
ER  
Human Protein Atlas:  
Vesicles, Neucleoplasm  
ER\_dis

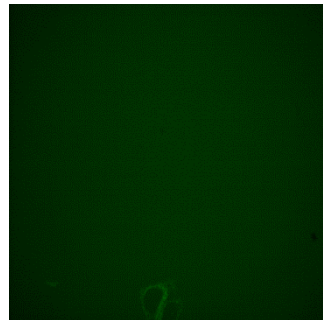

PLOD3, Intron 8\_1  
ER  
Human Protein Atlas:  
unknown  
ER\_unk

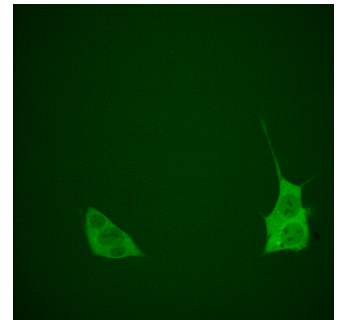

PNPO, Intron 1\_2  
Cytoplasm, Nucleus  
Human Protein Atlas:  
Nucleoplasm, Cytosol  
C\_id

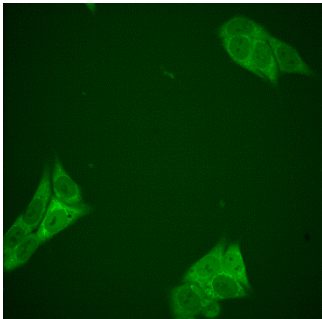

PNPO, Intron 1\_2  
Cytoplasm, Nucleus  
Human Protein Atlas:  
Nucleoplasm, Cytosol  
C\_id

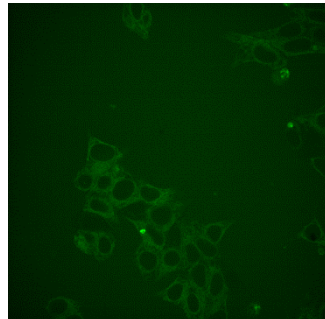

POFUT1, Intron 3\_2  
ER  
Human Protein Atlas:  
Centrosome  
ER\_dis

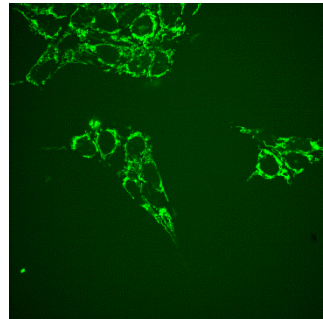

PPA2, Intron 3\_1  
Mitochondria  
Human Protein Atlas:  
Mitochondria, Nucleoplasm  
M\_sim

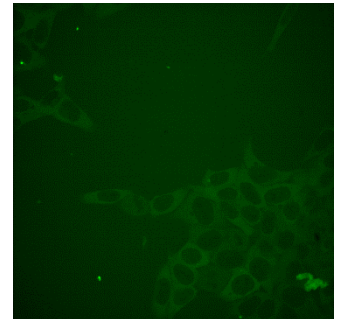

PPAT, Intron 9\_1  
Cytoplasm, Nucleus  
Human Protein Atlas:  
Midbody ring  
C\_dis

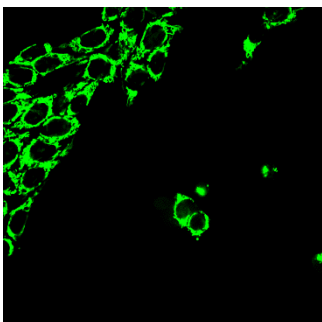

PRDX3, Intron 6\_2  
Mitochondria  
Human Protein Atlas:  
unknown  
M\_unk

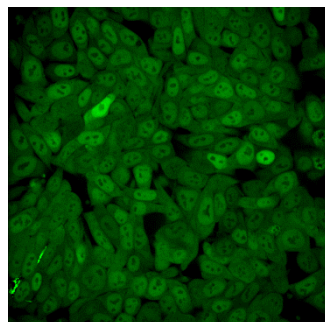

PRDX6, Intron 2\_2  
Nucleus, Cytoplasm  
Human Protein Atlas: Plasma  
membrane, Cytosol  
N\_sim

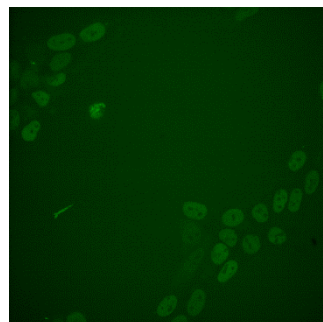

PRIM1, Intron 5\_1  
Nucleus  
Human Protein Atlas: Vesicles  
N\_dis

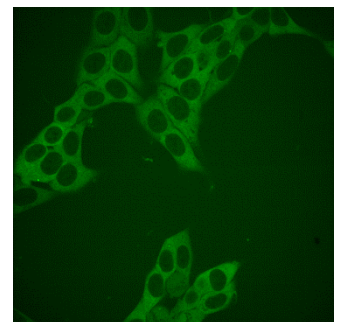

PRMT5, Intron 12\_1  
Cytoplasm, Nucleus  
Human Protein Atlas:  
Nucleoplasm, Cytosol  
C\_id

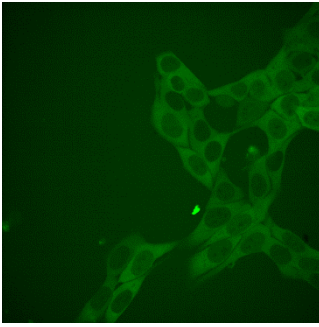

PRPS1, Intron 2\_2  
Cytoplasm, Nucleus  
Human Protein Atlas:  
unknown  
C\_unk

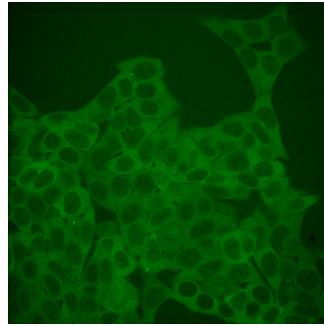

PRPS1, Intron 2\_2  
Cytoplasm, Nucleus  
Human Protein Atlas:  
unknown  
C\_unk

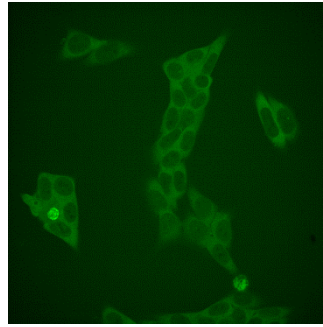

PRPS1, Intron 2\_2  
Cytoplasm, Nucleus  
Human Protein Atlas:  
unknown  
C\_unk

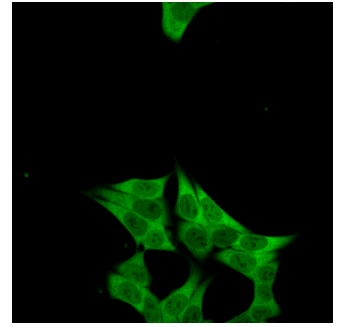

PSAT1, Intron 1\_2  
Cytoplasm, Nucleus  
Human Protein Atlas: Cytosol  
C\_sim

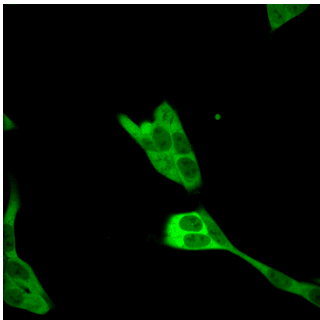

PSAT1, Intron 1\_2  
Cytoplasm, Nucleus  
Human Protein Atlas: Cytosol  
C\_sim

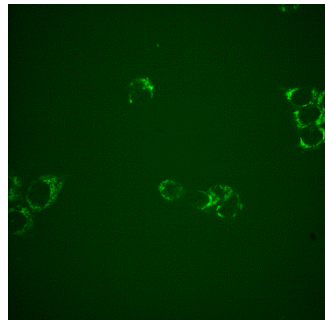

PYCR2, Intron 2\_1  
Mitochondria  
Human Protein Atlas:  
Mitochondria  
M\_id

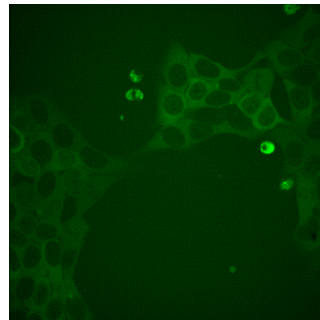

PYGL, Intron 4\_1  
Cytoplasm, Nucleus  
Human Protein Atlas: Plasma  
membrane, Cytosol  
C\_sim

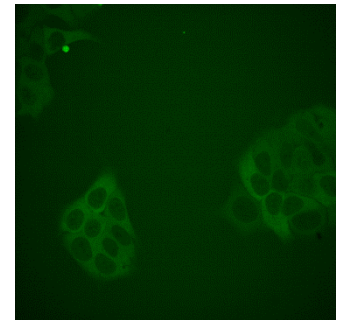

PYGL, Intron 4\_1  
Cytoplasm, Nucleus  
Human Protein Atlas: Plasma  
membrane, Cytosol  
C\_sim

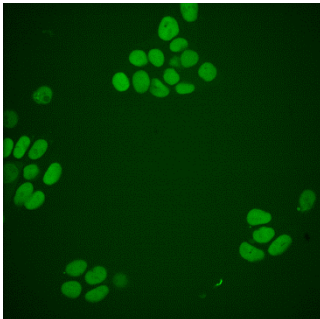

PYGO2, Intron 2\_1  
Nucleus  
Human Protein Atlas:  
Nucleoplasm  
N\_id

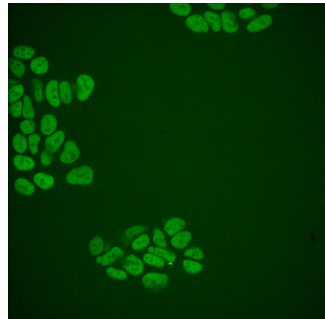

PYGO2, Intron 2\_2  
Nucleus  
Human Protein Atlas:  
Nucleoplasm  
N\_id

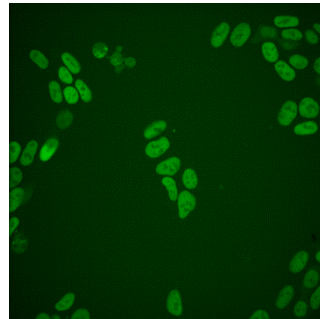

PYGO2, Intron 2\_2  
Nucleus  
Human Protein Atlas:  
Nucleoplasm  
N\_id

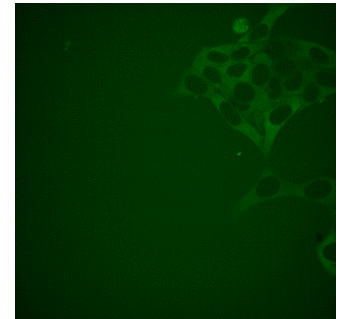

QARS, Intron 3\_1  
Cytoplasm  
Human Protein Atlas: Cytosol  
C\_id

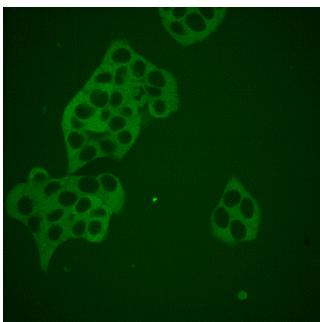

QARS, Intron 18\_1  
Cytoplasm  
Human Protein Atlas: Cytosol  
C\_id

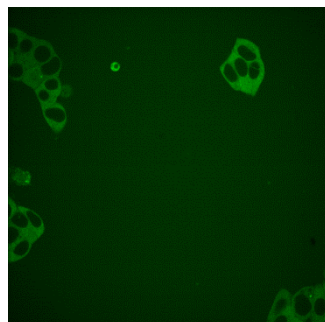

QARS, Intron 18\_1  
Cytoplasm  
Human Protein Atlas: Cytosol  
C\_id

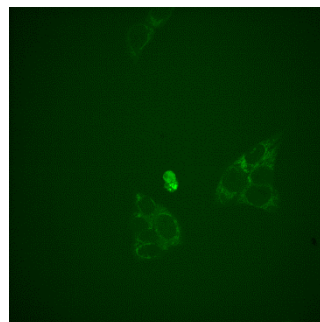

QDPR, Intron 1\_2  
Mitochondria, Nucleus  
Human Protein Atlas:  
Mitochondria  
M\_sim

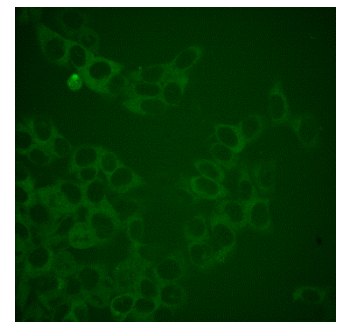

RLF, Intron 7\_1  
Cytoplasm, Nucleus  
Human Protein Atlas:  
Nucleoplasm, Nucleoli  
C\_sim

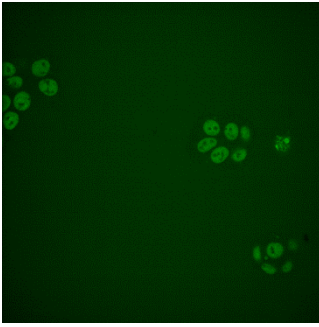

RNF40, Intron 8\_1  
Nucleus  
Human Protein Atlas:  
Nucleoplasm  
N\_id

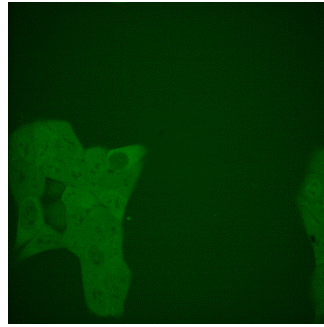

RPA1, Intron 8\_1  
Cytoplasm, Nucleus  
Human Protein Atlas:  
Nucleoplasm  
C\_sim

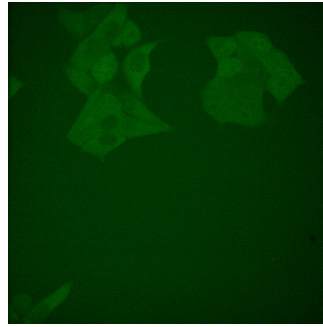

RPA1, Intron 9\_1  
Cytoplasm, Nucleus  
Human Protein Atlas:  
Nucleoplasm  
C\_sim

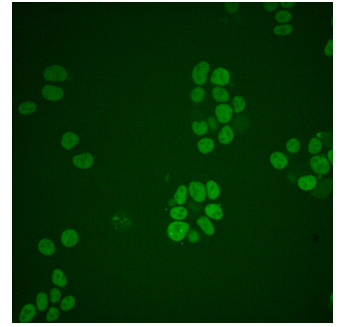

RPA1, Intron 13\_1  
Nucleus  
Human Protein Atlas:  
Nucleoplasm  
N\_id

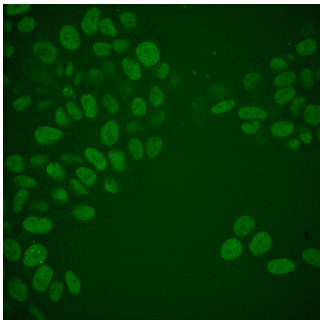

RPA2, Intron 3\_1  
Nucleus  
Human Protein Atlas:  
Nucleoplasm, Nuclear bodies  
N\_id

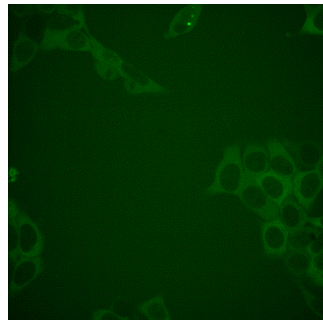

RRM1, Intron 17\_1  
Cytoplasm, Nucleus  
Human Protein Atlas: Cytosol  
C\_sim

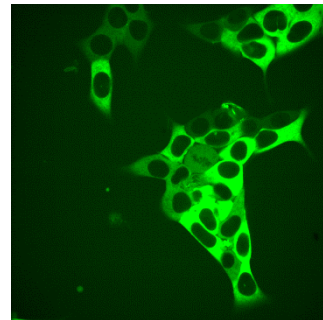

RRM2, Intron 2\_1  
Cytoplasm  
Human Protein Atlas: Cytosol  
C\_id

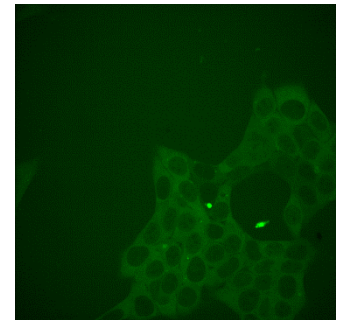

RRM2B, Intron 1\_1  
Cytoplasm, Nucleus  
Human Protein Atlas:  
Nucleoplasm  
C\_sim

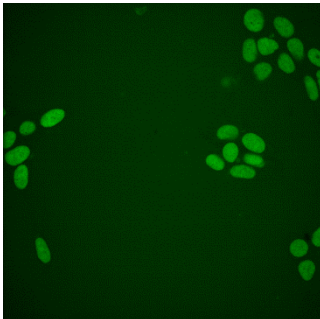

RTF1, Intron 2\_1  
Nucleus  
Human Protein Atlas:  
Nucleoplasm, Cytosol  
N\_sim

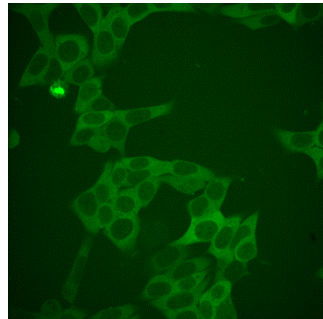

RUVBL1, Intron 1\_1  
Cytoplasm, Nucleus  
Human Protein Atlas:  
Nucleoplasm, Cytosol  
C\_id

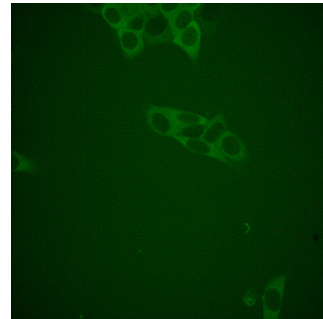

RUVBL1, Intron 2\_1  
Cytoplasm, Nucleus  
Human Protein Atlas:  
Nucleoplasm, Cytosol  
C\_id

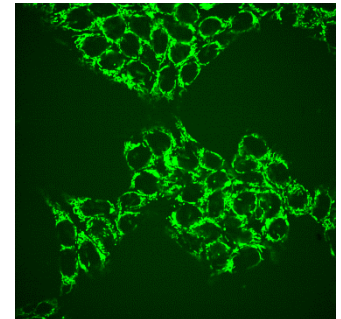

SDHA, Intron 9\_1  
Mitochondria  
Human Protein Atlas:  
Mitochondria, Nucleoli  
M\_sim

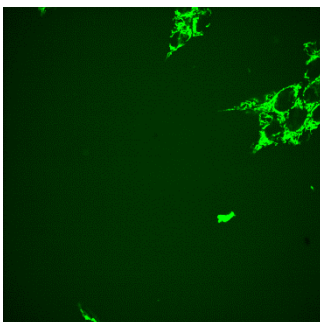

SDHA, Intron 14\_1  
Mitochondria  
Human Protein Atlas:  
Mitochondria, Nucleoli  
M\_sim

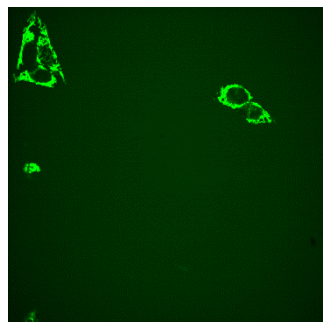

SDHB, Intron 5\_1  
Mitochondria  
Human Protein Atlas:  
Mitochondria, Nucleoplasm,  
Plasma membrane, M\_sim

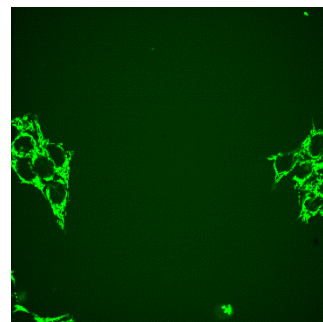

SDHB, Intron 5\_1  
Mitochondria  
Human Protein Atlas:  
Mitochondria, Nucleoplasm,  
Plasma membrane, M\_sim

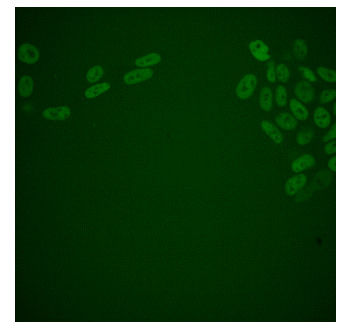

SEPHS1, Intron 6\_1  
Nucleus  
Human Protein Atlas:  
Nucleoplasm  
N\_id

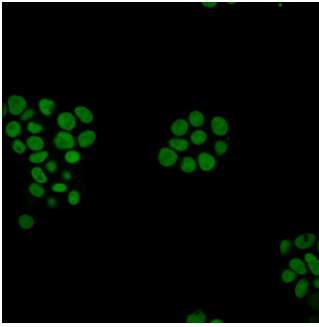

SET, Intron 4\_1  
Nucleus  
Human Protein Atlas:  
Nucleoplasm, Lipid droplets  
N\_sim

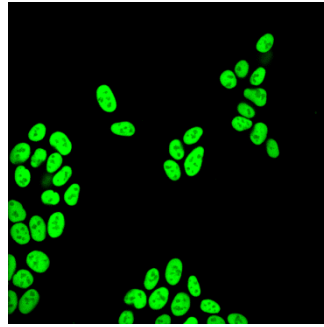

SET, Intron 6\_1  
Nucleus  
Human Protein Atlas:  
Nucleoplasm, Lipid droplets  
N\_sim

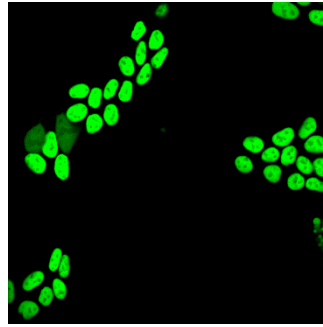

SET, Intron 7\_1  
Nucleus  
Human Protein Atlas:  
Nucleoplasm, Lipid droplets  
N\_sim

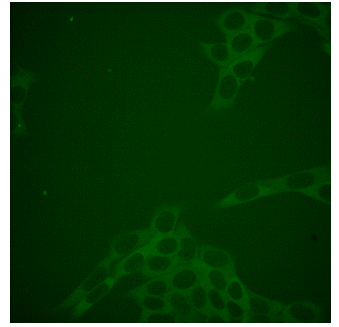

SMAD4, Intron 2\_1  
Cytoplasm, Nucleus  
Human Protein Atlas:  
Nucleoplasm, Cytosol,  
Centrosome, C\_id

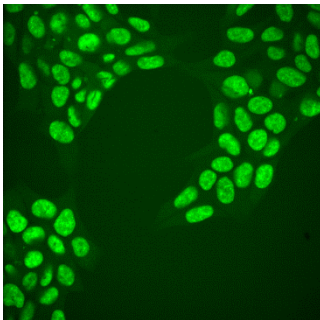

SMNDC1, Intron 2\_2  
Nucleus, Cytoplasm  
Human Protein Atlas:  
Nucleoplasm, Nuclear bodies  
N\_sim

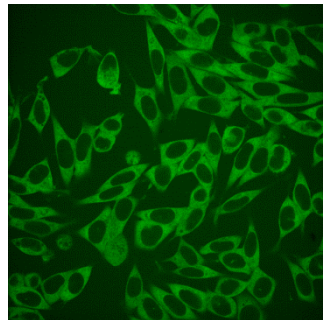

SMOX, Intron 7\_1  
Cytoplasm  
Human Protein Atlas: Nuclear  
membrane, Nucleoplasm,  
Vesicles, C\_dis

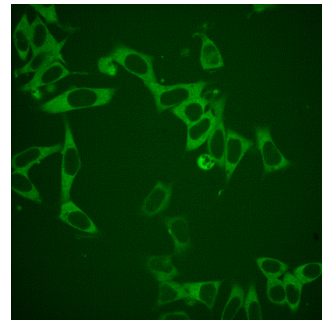

SMOX, Intron 7\_1  
Cytoplasm  
Human Protein Atlas: Nuclear  
membrane, Nucleoplasm,  
Vesicles, C\_dis

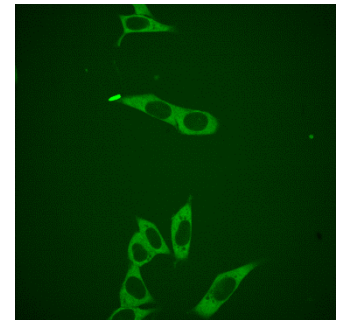

SMOX, Intron 7\_1  
Cytoplasm  
Human Protein Atlas: Nuclear  
membrane, Nucleoplasm,  
Vesicles, C\_dis

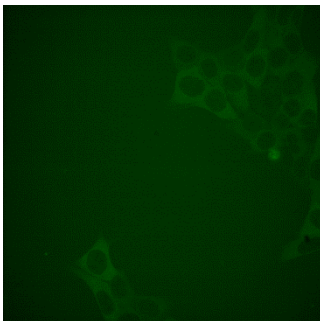

SMS, Intron 5\_2  
Cytoplasm  
Human Protein Atlas: Nuclear  
bodies, Cytosol  
C\_sim

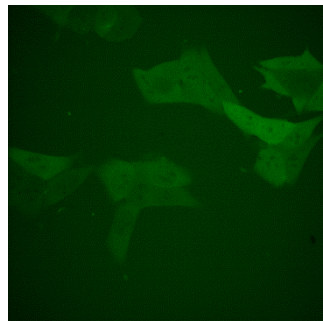

SNCA, Intron 4\_1  
Cytoplasm, Nucleus  
Human Protein Atlas:  
unknown  
C\_unk

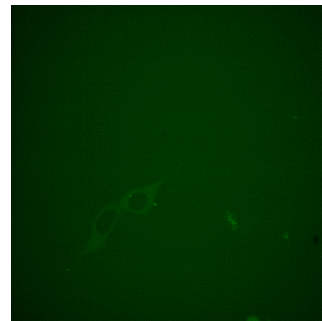

SOD1, Intron 1\_1  
Cytoplasm  
Human Protein Atlas:  
Nucleoplasm, Plasma  
membrane, Cytosol, C\_sim

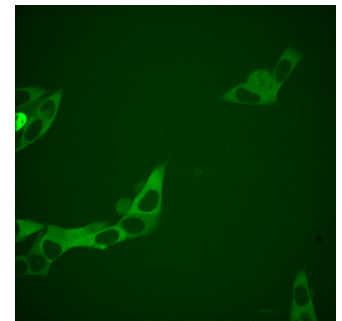

SOD1, Intron 4\_1  
Cytoplasm  
Human Protein Atlas:  
Nucleoplasm, Plasma  
membrane, Cytosol, C\_sim

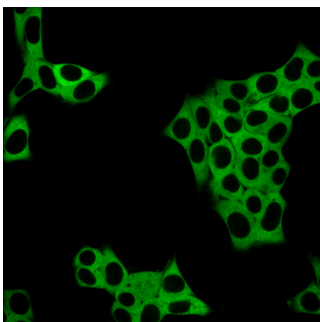

SOD1, Intron 4\_2  
Cytoplasm  
Human Protein Atlas:  
Nucleoplasm, Plasma  
membrane, Cytosol, C\_sim

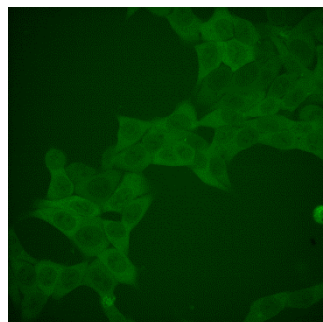

SORD, Intron 1\_2  
Cytoplasm, Nucleus  
Human Protein Atlas: Cytosol  
C\_sim

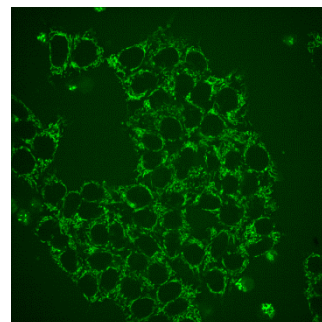

SUCLA2, Intron 5\_1  
Mitochondria  
Human Protein Atlas:  
Mitochondria  
M\_id

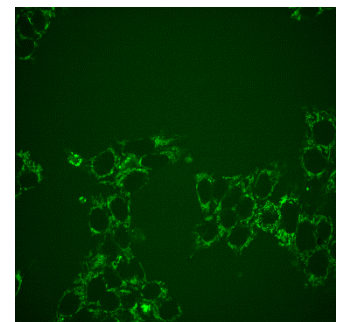

SUCLA2, Intron 5\_1  
Mitochondria  
Human Protein Atlas:  
Mitochondria  
M\_id

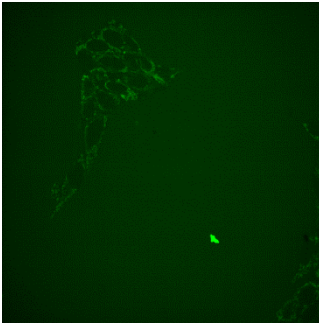

SUCLA2, Intron 10\_1  
Mitochondria  
Human Protein Atlas:  
Mitochondria  
M\_id

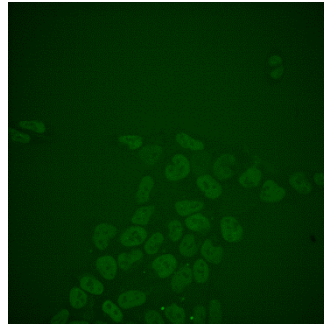

SUPT6H, Intron 28\_1  
Nucleus  
Human Protein Atlas:  
Nucleoplasm, Cytosol, Plasma  
membrane, N\_sim

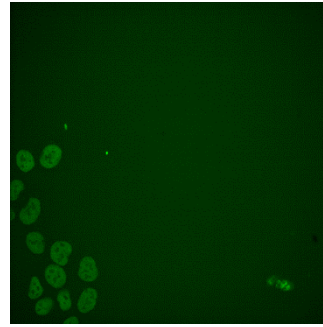

SUPT7L, Intron 4\_1  
Nucleus  
Human Protein Atlas:  
Nucleoplasm  
N\_id

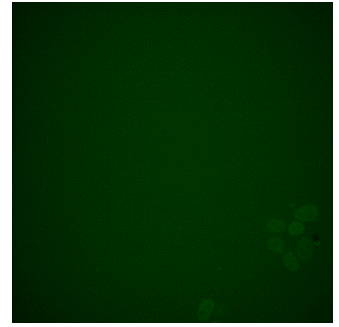

TADA3, Intron 6\_1  
Nucleus  
Human Protein Atlas:  
Nucleoplasm  
N\_id

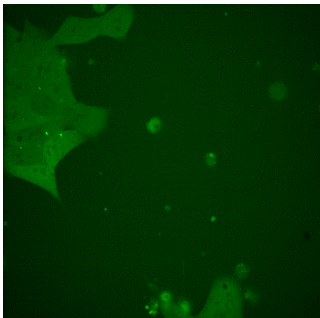

TAF9B, Intron 1\_2  
Cytoplasm, Nucleus  
Human Protein Atlas:  
Nucleoplasm  
C\_sim

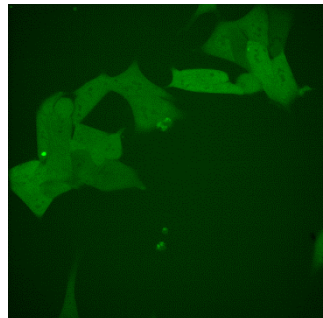

TAF9B, Intron 1\_2  
Nucleus  
Human Protein Atlas:  
Nucleoplasm  
N\_id

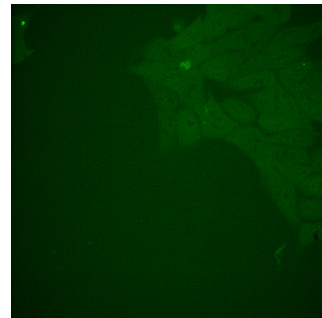

TAF10, Intron 2\_2  
Cytoplasm, Nucleus  
Human Protein Atlas:  
Nucleoplasm  
C\_sim

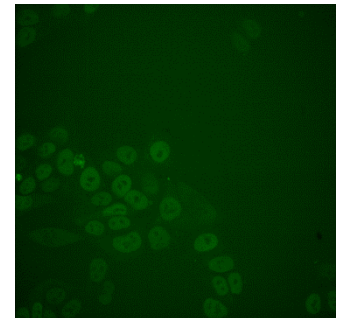

TALDO1, Intron 7\_1  
Nucleus, Cytoplasm  
Human Protein Atlas:  
Nucleoplasm, Cytosol  
N\_id

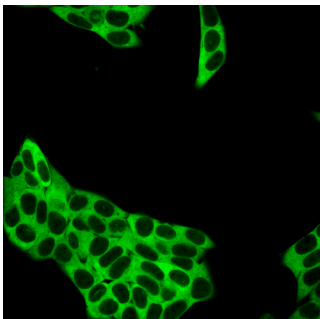

TARS, Intron 1\_1  
Cytoplasm, Nucleus  
Human Protein Atlas: Cytosol,  
Actin filaments  
C\_id

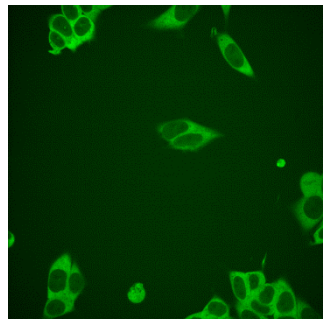

TARS, Intron 1\_1  
Cytoplasm, Nucleus  
Human Protein Atlas: Cytosol,  
Actin filaments  
C\_id

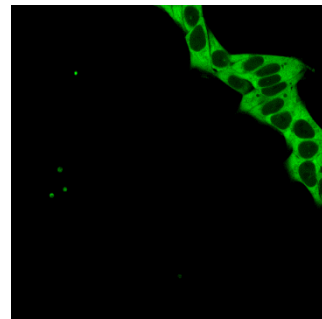

TARS, Intron 1\_1  
Cytoplasm, Nucleus  
Human Protein Atlas: Cytosol,  
Actin filaments  
C\_id

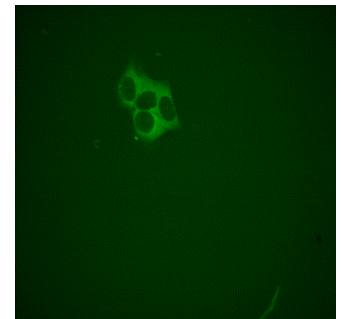

TARS, Intron 8\_1  
Cytoplasm, Nucleus  
Human Protein Atlas: Cytosol,  
Actin filaments  
C\_id

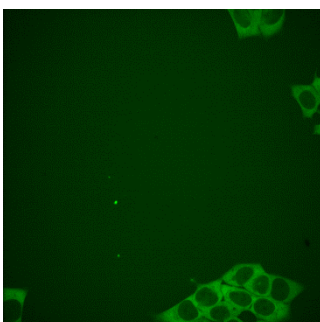

TARS, Intron 9\_1  
Cytoplasm, Nucleus  
Human Protein Atlas: Cytosol,  
Actin filaments  
C\_id

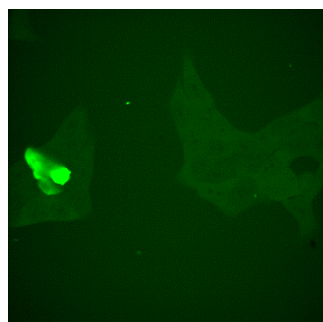

TIGAR, Intron 4\_1  
Cytoplasm, Nucleus  
Human Protein Atlas: Cytosol  
C\_sim

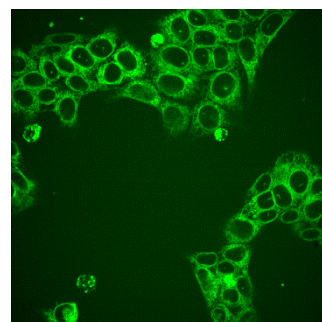

TXNDC5, Intron 5\_1  
ER  
Human Protein Atlas: ER  
ER\_id

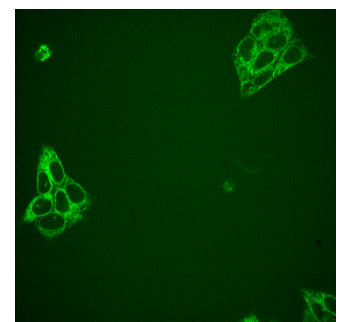

TXNDC5, Intron 5\_1  
ER  
Human Protein Atlas: ER  
ER\_id

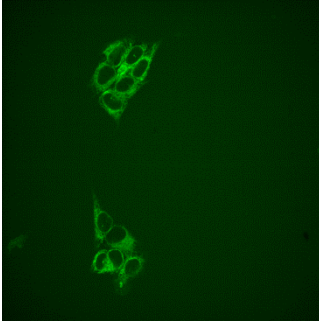

TXNDC5, Intron 6\_1  
ER  
Human Protein Atlas: ER  
ER\_id

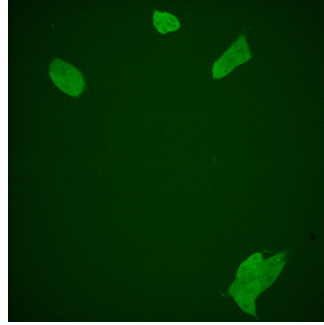

TXNDC9, Intron 2\_1  
Cytoplasm, Nucleus  
Human Protein Atlas: Cytosol  
C\_sim

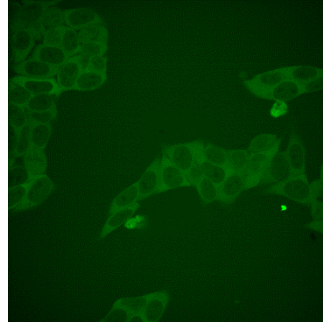

TXNRD1, Intron 10\_1  
Cytoplasm, Nucleus  
Human Protein Atlas:  
Nucleoplasm  
C\_sim

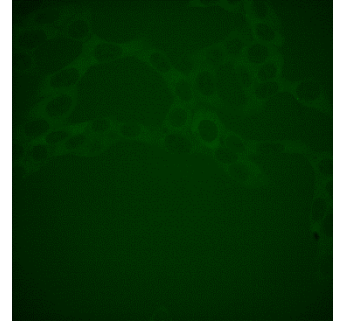

TYMS, Intron 4\_1  
Cytoplasm, Nucleus  
Human Protein Atlas:  
unknown  
C\_unk

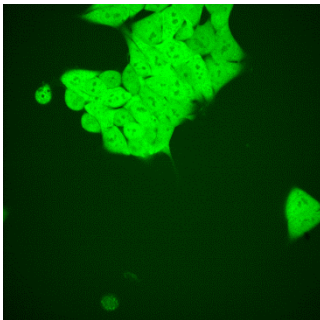

UBE2N, Intron 1\_1  
Cytoplasm, Nucleus  
Human Protein Atlas:  
Nucleoplasm, Nucleoli  
fibrillary center, C\_sim

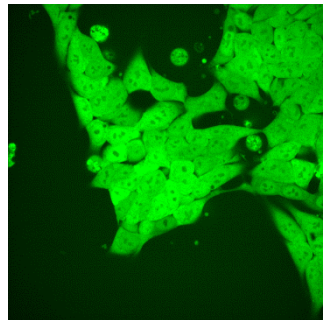

UBE2N, Intron 1\_1  
Cytoplasm, Nucleus  
Human Protein Atlas:  
Nucleoplasm, Nucleoli  
fibrillary center, C\_sim

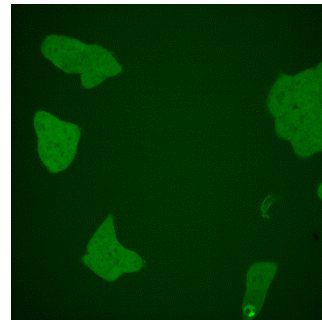

UBE2N, Intron 1\_2  
Cytoplasm, Nucleus  
Human Protein Atlas:  
Nucleoplasm, Nucleoli  
fibrillary center, C\_sim

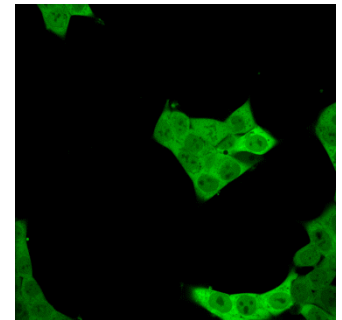

UQCRC2, Intron 11\_1  
Cytoplasm, Nucleus  
Human Protein Atlas:  
Mitochondria  
C\_dis

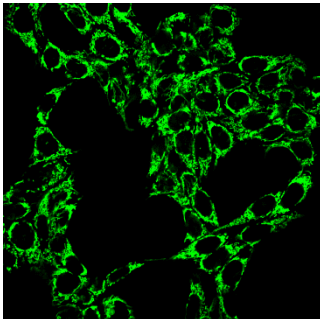

UQCRC2, Intron 13\_1  
Mitochondria  
Human Protein Atlas:  
Mitochondria  
M\_id

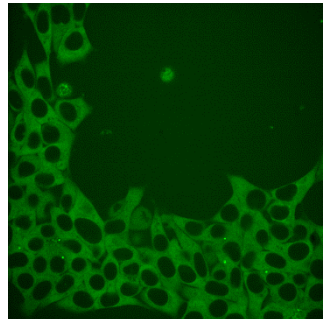

USP9X, Intron 42\_1  
Cytoplasm  
Human Protein Atlas: Vesicles  
C\_dis

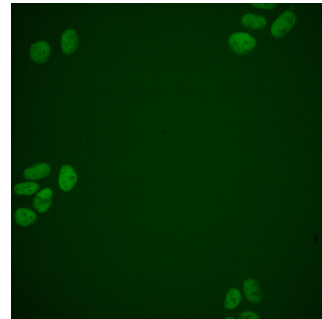

USP22, Intron 1\_2  
Nucleus  
Human Protein Atlas: Nuclear  
speckles  
N\_id

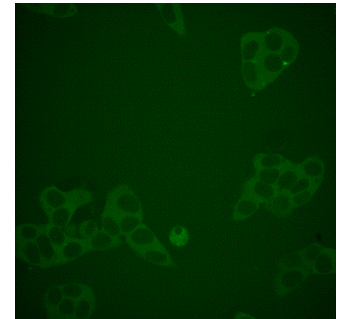

VPS4A, Intron 9\_1  
Cytoplasm, Nucleus  
Human Protein Atlas:  
Midbody  
C\_dis

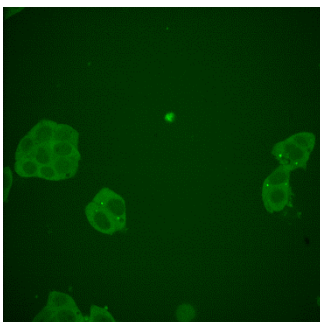

VPS4B, Intron 1\_1  
Cytoplasm, Nucleus  
Human Protein Atlas:  
Vesicles, Intermediate  
filaments, C\_sim

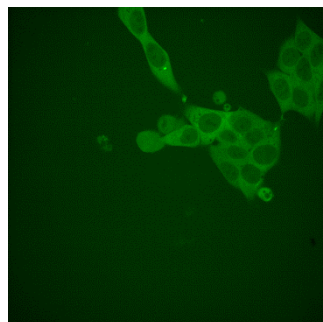

VPS4B, Intron 1\_1  
Cytoplasm, Nucleus  
Human Protein Atlas:  
Vesicles, Intermediate  
filaments, C\_sim

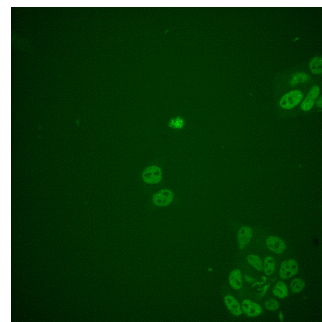

WDR82, Intron 6\_1  
Nucleus  
Human Protein Atlas: Nucleoli  
N\_id
