# Supplementary material for: Pooled protein tagging, cellular imaging, and in situ sequencing for monitoring drug action in real time
Source: HighWire-hosted journal article supplement (doi:10.1101/gr.261503.120), 2020-11-17
Supplement: Supplemental_Tables.xlsx [file Supplemental_Tables.xlsx]

## Sheet: Supplemental Table S1
# Supplemental Table S1: Names and sequences of sgRNAs in the intron-targeting library for metabolic enzymes and epigenetic modifiers
Gene	sgRNA name	sequence
AADACL3	AADACL3_Intron1_1	CTAACAGGTAGATAGCAGTG
AADACL3	AADACL3_Intron1_2	CCAAAGCGGAGAATGCAAGG
AADACL3	AADACL3_Intron1_3	ACACTGGAAAGGATACCCAG
AADACL4	AADACL4_Intron1_3	TAGCTGGTAACTTAGGACAG
AADACL4	AADACL4_Intron1_1	ATAGGTAAGTCAGTGCACTG
AADACL4	AADACL4_Intron1_2	TTGGTGGTAGGAACAAACAT
ABHD2	ABHD2_Intron9_1	TATCTGTCGTATTGTGTGCG
ABHD2	ABHD2_Intron9_2	GTTTGAGCCTTGAATCGATG
ABHD2	ABHD2_Intron9_3	CTTGCTGAACAGGTACAGGA
ABHD5	ABHD5_Intron6_2	TGGTATCACGTCCCCGACTG
ABHD5	ABHD5_Intron6_3	GACGTGATACCACCTGTGAT
ABHD5	ABHD5_Intron6_1	CATACCTGCAGCCTCAGTCG
ACER2	ACER2_Intron1_2	GTTGTCTGAGACGTCCCAGG
ACER2	ACER2_Intron1_3	ACGACAGTTGGTCATCCCAG
ACER2	ACER2_Intron1_1	AGTAGTACGTAAGAACACAG
ACOT1	ACOT1_Intron2_3	CTACAAATATCTTTACTAGC
ACOT1	ACOT1_Intron2_2	GGAAGATCTATCAATTACTC
ACOT1	ACOT1_Intron2_1	GTTCAACTAACTTCCAGGGT
ACOT13	ACOT13_Intron1_3	AATACACTTAAACTGAGGCG
ACOT13	ACOT13_Intron1_2	GCCAATAGGAGACTTCAATG
ACOT13	ACOT13_Intron1_1	TAGGATCTAGAAATACCATG
ACOT2	ACOT2_Intron2_1	CTACGAATCTCTTTACTAGC
ACOT2	ACOT2_Intron2_2	CATCATCTCATGGCCGGGAG
ACOT2	ACOT2_Intron2_3	AAGAATGATTCCACAAACAG
ACOT4	ACOT4_Intron2_1	TGGCAATGCATCCAATAGTG
ACOT4	ACOT4_Intron2_2	GTCTGACTGAAGTCTTCATG
ACOT4	ACOT4_Intron2_3	CAGAGCAGCATTTCTGCACG
ACOT6	ACOT6_Intron1_3	AGTTAAGAAAGCTACTGGCG
ACOT6	ACOT6_Intron1_1	AGGCCCCTTAAGGTCCACGA
ACOT6	ACOT6_Intron1_2	TGGGTCAGGAGTATACACAG
ACYP2	ACYP2_Intron2_1	GCTAAGACTGATGTAAGACG
ACYP2	ACYP2_Intron2_2	ACATATGTACCGTTGCCTAG
ACYP2	ACYP2_Intron2_3	CATACTCTTCTCCTGTATGG
ADAD1	ADAD1_Intron12_2	GTAATCACAAAACTCGATGG
ADAD1	ADAD1_Intron12_1	CCAAGTTGTTCTAACCACTG
ADAD1	ADAD1_Intron12_3	GACAGAGCAACATCTTACAG
ADAD2	ADAD2_Intron10_3	GGGCTGGAGAGGGACCGGGA
ADAD2	ADAD2_Intron10_2	GTGAGAGGAGGTACCTGCAG
ADAD2	ADAD2_Intron10_1	GGTGAGAGGAGGTACCTGCA
AK4	AK4_Intron3_3	GAATTAGGCCTTGGTGACAG
AK4	AK4_Intron3_1	CCATGACTATTACTCACCAG
AK4	AK4_Intron3_2	AAGTTTGGCGAAAATCAGGG
ALAS1	ALAS1_Intron9_1	TTAAGGTCAGTGCTCCGGAG
ALAS1	ALAS1_Intron9_2	CCGGAGCACTGACCTTAACA
ALAS1	ALAS1_Intron9_3	CAATGGCGGAAACATGACAG
AOC1	AOC1_Intron4_1	AAGGCTAGAGTGGCCTCCAG
AOC1	AOC1_Intron4_2	TGTGTGGACGGCAAGTTCAG
AOC1	AOC1_Intron4_3	GCAGAACTGAAAATGACCAA
AOC2	AOC2_Intron3_2	TCCATGTAAGCAGCTGTGCG
AOC2	AOC2_Intron3_3	AGAGCTAATCTCACCCCAGG
AOC2	AOC2_Intron3_1	AGTTTTCTGATGACCAACAC
AOC3	AOC3_Intron3_2	ATTGCCTATCTACCCCCAGA
AOC3	AOC3_Intron3_1	GGTGAGCTGAATCCCTACCA
AOC3	AOC3_Intron3_3	AAACCACCTGCACTTCTCAG
APEX1	APEX1_Intron3_1	GCTAAGTCATAGATACGCAC
APEX1	APEX1_Intron3_2	TGCTAAGTCATAGATACGCA
APEX1	APEX1_Intron3_3	CCTGCCCGTAGTTTTCTGTG
APOBEC3C	APOBEC3C_Intron2_1	GTAAATAAGGAAACGGCCCG
APOBEC3C	APOBEC3C_Intron2_3	ACTCTCCTGTGATCAGATCG
APOBEC3C	APOBEC3C_Intron2_2	ACACATGAGTCTATGAGACA
APOC1	APOC1_Intron2_2	GACTCTCTAACTTGCCAAAG
APOC1	APOC1_Intron2_1	CCCCTCTGTCAAGATCACAC
APOC1	APOC1_Intron2_3	ACATGTACCAGACACCCTGT
ARSG	ARSG_Intron10_1	CAACTGATATACGATGCACG
ARSG	ARSG_Intron10_3	GTGCTTCAGAGTGCAAACAG
ARSG	ARSG_Intron10_2	GGCAACTTCCAAAATCCACG
ASNSD1	ASNSD1_Intron4_2	AATAGGTCTCAGGAATTCTC
ASNSD1	ASNSD1_Intron4_1	AAGGGTCAAAAATAGGTCTC
ASNSD1	ASNSD1_Intron4_3	AAGCTTTAAGGGTCAAAAAT
ASRGL1	ASRGL1_Intron3_2	TGGTCTGGTCAGTTTGTATG
ASRGL1	ASRGL1_Intron3_1	TAGTAATGTCCCATCAATTG
ASRGL1	ASRGL1_Intron3_3	CATACAGAAAAGCAAACCAC
AWAT1	AWAT1_Intron3_2	TATGGACAACTCTAGTCATG
AWAT1	AWAT1_Intron3_1	GATGCAATTCTCTGCCATCG
AWAT1	AWAT1_Intron3_3	AAGCTTGGCTCTAAAAGTCG
B3GNT3	B3GNT3_Intron2_1	GTTTCCCAAGTAACCCCACA
B3GNT3	B3GNT3_Intron2_2	GGGGATGTTAACAATCACAC
B3GNT3	B3GNT3_Intron2_3	TGGGCTGTGATGGACTGACG
B3GNT4	B3GNT4_Intron2_1	CCCCCGCATAGATCTCCAGG
B3GNT4	B3GNT4_Intron2_2	GGAGACAGAATCCACCAGTG
B3GNT4	B3GNT4_Intron2_3	AGAAATCAGCACTTAGAACG
B4GALT2	B4GALT2_Intron3_2	ACTCTGGACTAGGACTAGCA
B4GALT2	B4GALT2_Intron3_3	GTATGATGGGACACAAGTGG
B4GALT2	B4GALT2_Intron3_1	AGGAAGGAATAAGCGTACTG
BLVRA	BLVRA_Intron2_3	GAGGTGATATATGTTGCCAG
BLVRA	BLVRA_Intron2_1	TGTGCCCAGAACATTAACCA
BLVRA	BLVRA_Intron2_2	GAAGTGGAGAGCCAAATTGG
BPHL	BPHL_Intron4_2	GTCCGCGGGTGAATCAGAGA
BPHL	BPHL_Intron4_1	AGTCCGCGGGTGAATCAGAG
BPHL	BPHL_Intron4_3	GACCCTCTCTGATTCACCCG
BSND	BSND_Intron1_1	GTACAAAGCATCCTTAACGG
BSND	BSND_Intron1_2	GTAGCATGATCAAAGCAATG
BSND	BSND_Intron1_3	GGAGACAGGCTGCACCACGG
C1GALT1	C1GALT1_Intron2_2	AGAGCCTTCTAGTCATCAGG
C1GALT1	C1GALT1_Intron2_1	AACATATTAGTACATAAGTG
C1GALT1	C1GALT1_Intron2_3	TTTATGTAAGAATCTCCTGA
CASP7	CASP7_Intron6_1	GTTAGCATATGTGTTTCCAC
CASP7	CASP7_Intron6_2	CTTCATAATTTGTGATCCAG
CASP7	CASP7_Intron6_3	CACCCAGCCACAAATTATGA
CASP8	CASP8_Intron4_2	TCCTGCGAATGCATTACTTG
CASP8	CASP8_Intron4_1	CCTGAGACTTGGTTAGCCAG
CASP8	CASP8_Intron4_3	GTCATCATGGTGACACCCTG
CAV3	CAV3_Intron1_2	GAAACCTGCTACCACCTGTG
CAV3	CAV3_Intron1_3	GGGAGCAACTAATTGCCTGG
CAV3	CAV3_Intron1_1	ATAGGGATACTGTTACCACA
CDA	CDA_Intron3_2	GTTTCATAATCTACCCTGTG
CDA	CDA_Intron3_1	AAAGCAGTGAATTTACACGG
CDA	CDA_Intron3_3	GAAATAGCTGCCCTGCACGG
CHST11	CHST11_Intron2_3	GGCCTGATAGAATCATCACG
CHST11	CHST11_Intron2_2	TCTGGACCTCAATAACACTG
CHST11	CHST11_Intron2_1	CAGGAAGCACGATTTCACAG
CHST13	CHST13_Intron2_1	TCTGTTTGAGAATCACGCCG
CHST13	CHST13_Intron2_3	TGACAGAAGTCAACATCCGG
CHST13	CHST13_Intron2_2	TGAGACTGGACCCCACACTG
CHST8	CHST8_Intron3_1	ATTTCGGCCACAAGATGGCG
CHST8	CHST8_Intron3_3	AAATGACACTTACACCTCAG
CHST8	CHST8_Intron3_2	TGGTGAGAGCCTGACCTGTG
CHSY3	CHSY3_Intron2_3	GTGATACGCTTAAAGCACTG
CHSY3	CHSY3_Intron2_2	CTGTACCAACATCATCAGAG
CHSY3	CHSY3_Intron2_1	GCTAAGTATGATGACCACAG
CHTOP	CHTOP_Intron1_1	TTATATGCAAGTCCGGACAG
CHTOP	CHTOP_Intron1_3	GTAGGTGTAACCAACCGTAA
CHTOP	CHTOP_Intron1_2	GGAAGGATATGTCCAAGCTG
CNP	CNP_Intron3_3	GGTCTATGCAGCTACGCCTG
CNP	CNP_Intron3_2	ACTAGGTAAACAGCCCACAG
CNP	CNP_Intron3_1	GGCTCAAGTGAGAAACACGA
COMT	COMT_Intron4_2	AACGTGGTGTGAACACCTGG
COMT	COMT_Intron4_1	TAGTGGGTTTTCAGTGAACG
COMT	COMT_Intron4_3	ACGTGGTGTGAACACCTGGT
COQ4	COQ4_Intron4_3	AAGTGTCACAATCGCCAGCG
COQ4	COQ4_Intron4_2	GGACAGGGGACACTTAACCC
COQ4	COQ4_Intron4_1	CATCAGTGGGAAACTCACCA
COX5B	COX5B_Intron2_3	GGCCTTGGATGTGTTCATAG
COX5B	COX5B_Intron2_1	GACCACTATGAACACATCCA
COX5B	COX5B_Intron2_2	TGTATCAAATACTCCCAGAG
COX6A1	COX6A1_Intron2_1	GTCATGAACTGCTTATAACG
COX6A1	COX6A1_Intron2_2	GGAGCTCTTATAACTACCAG
COX6A1	COX6A1_Intron2_3	ATAGGCAAGATAATTCAGGG
COX6B1	COX6B1_Intron3_3	CTACATCTAGCAAAGCACCC
COX6B1	COX6B1_Intron3_2	TATGCTGTTTGTCCAAACAG
COX6B1	COX6B1_Intron3_1	ACTGGTGCAAGAACGAACAG
COX7B	COX7B_Intron3_1	TAATTACCCACACAGTGCAG
COX7B	COX7B_Intron3_2	GAATATGACTAGTATCACCA
COX7B	COX7B_Intron3_3	TCAGGTTTGGCCTATATGGA
COX7C	COX7C_Intron1_1	CAATCTCGGAGGGTCACACG
COX7C	COX7C_Intron1_3	TCTCCCACGCCACAGCCCGG
COX7C	COX7C_Intron1_2	GCCAAACCCAGCCTTAACTG
COX8A	COX8A_Intron1_1	TCTGGAGGGCGCGAACGACG
COX8A	COX8A_Intron1_2	CTAGGGGAATACTGACTCCG
COX8A	COX8A_Intron1_3	CAAGGACTTAGAGAGCCTAG
CSGALNACT2	CSGALNACT2_Intron6_2	GCCAAGTAGGTAAACCAGGG
CSGALNACT2	CSGALNACT2_Intron6_1	AGAATGTAAAGCTCCCTGAG
CSGALNACT2	CSGALNACT2_Intron6_3	ATGGTGTAGAGATGTCAAAG
CYB5R4	CYB5R4_Intron3_1	GATCCAACTAGGCCACCAAG
CYB5R4	CYB5R4_Intron3_2	AATTGTACCCTAAGACACCG
CYB5R4	CYB5R4_Intron3_3	GATTCTAAAGAAGTTCAGTG
CYBRD1	CYBRD1_Intron2_1	GTGATGATTCCTAAACACTG
CYBRD1	CYBRD1_Intron2_2	TCTGATGTACAGGTACTGTG
CYBRD1	CYBRD1_Intron2_3	GAAGCTGTTCTTCAACACAG
CYP1A2	CYP1A2_Intron2_3	TGCCTAGAGACCAAGTTGGG
CYP1A2	CYP1A2_Intron2_1	GACACTTTAAGCCATACCCA
CYP1A2	CYP1A2_Intron2_2	AGAAACCTAAACCCCAACAG
CYP4F8	CYP4F8_Intron2_1	TGGAGAAGGTCTGTACACGG
CYP4F8	CYP4F8_Intron2_2	CCCAAGCGTAGTCCTCCCTG
CYP4F8	CYP4F8_Intron2_3	TGGTTCCCAGAACAACACGG
DBI	DBI_Intron2_2	GCGCTGCTTCTCCCGCAGAG
DBI	DBI_Intron2_1	AGAGGGTAAGAATCCTACTG
DBI	DBI_Intron2_3	TCTTACCCTCTCCCACCCAG
DEGS1	DEGS1_Intron2_3	TTGAATACACTCGACCCTCT
DEGS1	DEGS1_Intron2_2	GGACTGACAAAATACTAGCC
DEGS1	DEGS1_Intron2_1	AATCAGCCTGTCATAGCATG
DGAT2	DGAT2_Intron4_2	AATGTCCCATCAGAGCCTTG
DGAT2	DGAT2_Intron4_1	GACCTGATGTCAGATCACCA
DGAT2	DGAT2_Intron4_3	AAGCTGGAATCAATCCAATG
DGAT2L6	DGAT2L6_Intron3_1	AGGATTGCCAGGGCTCACGA
DGAT2L6	DGAT2L6_Intron3_2	AGGGCTCACGATGGTCAGAG
DGAT2L6	DGAT2L6_Intron3_3	TGATGACAACCTAGTGAACA
DIRC2	DIRC2_Intron5_3	ACTGCCAAGCTAATAGAGTG
DIRC2	DIRC2_Intron5_1	ATATAATGACAAGGTCCTAG
DIRC2	DIRC2_Intron5_2	TTTGATATGATATAACTAGG
DOLPP1	DOLPP1_Intron2_1	CCAGTAACGCCCCAACCTGG
DOLPP1	DOLPP1_Intron2_2	TCCACGCACCTCAAGACAGG
DOLPP1	DOLPP1_Intron2_3	GTAACCTAGAACCAGCCAGG
DR1	DR1_Intron3_1	GTGTTACCCACCAAGCAAGG
DR1	DR1_Intron3_2	ACTATTGTGAGGATGACCAG
DR1	DR1_Intron3_3	AAATTAACAGACATACCCAG
DUT	DUT_Intron6_3	GCTATTATGTAGTATTACTT
DUT	DUT_Intron6_2	ATATAGCAAGAGTAGAATTC
DUT	DUT_Intron6_1	ATTTTTCTTAGGAGCTGGAG
ENDOG	ENDOG_Intron1_2	ATATCCAGTGAGACAAGCGG
ENDOG	ENDOG_Intron1_1	TATCCAGTGAGACAAGCGGG
ENDOG	ENDOG_Intron1_3	AATGGATGGAGACTGCCATG
EPHX1	EPHX1_Intron2_3	TTACCCAGGCGTCTCTACAG
EPHX1	EPHX1_Intron2_1	GAACAACAATCCTCACCCCG
EPHX1	EPHX1_Intron2_2	ATAAAGCAACTCGTTCAAGG
FABP7	FABP7_Intron2_2	AGTCAATCTGAGGCAACCTG
FABP7	FABP7_Intron2_1	TAGTCAATCTGAGGCAACCT
FABP7	FABP7_Intron2_3	CTGTCTATTTAGTCAATCTG
FAHD1	FAHD1_Intron1_1	ACTACTTTCTGAGAGCTGGG
FAHD1	FAHD1_Intron1_2	GTGGTGAACACTGACCCCAG
FAHD1	FAHD1_Intron1_3	TACAAACGGAGCCACACAGT
FKBP10	FKBP10_Intron9_2	CGCACCCTGTAACTCAGGAA
FKBP10	FKBP10_Intron9_3	TCCTGAGTTACAGGGTGCGG
FKBP10	FKBP10_Intron9_1	CCCGCACCCAGGAAGCATCG
FKBP2	FKBP2_Intron2_2	TGGTTCTCCATAAGCCAGGT
FKBP2	FKBP2_Intron2_1	GAAACTGGCTTAGAGGCGAG
FKBP2	FKBP2_Intron2_3	ACAAAAAGGACTGACCACCA
FKBP9	FKBP9_Intron9_3	TACCTTCAGAACCGGCCCCA
FKBP9	FKBP9_Intron9_2	GGGAGCCTGGTAAGGCCGTG
FKBP9	FKBP9_Intron9_1	TAGATGTCTCCTGAGCAGAG
FUT11	FUT11_Intron1_3	GAAAAGGAGAGGGCGGGTTG
FUT11	FUT11_Intron1_1	TCCAGGTGTCCAGGCCTCCA
FUT11	FUT11_Intron1_2	TCATGAGGGTGCGGCCCTGG
FUT8	FUT8_Intron6_2	CCTTAGCTAGGCAATTAGAG
FUT8	FUT8_Intron6_1	CCAAAGCAAGCAAAACACGG
FUT8	FUT8_Intron6_3	GATTTCATGAAGTAGCAGAG
FXN	FXN_Intron4_1	TAAAAGACTAGGGTTCCGGG
FXN	FXN_Intron4_2	GTGTTGCACCCTATACTGGG
FXN	FXN_Intron4_3	GGTCTGCAAGGTGAGAATGG
GCDH	GCDH_Intron8_2	TGTGTGCAAACCGAGTGAGC
GCDH	GCDH_Intron8_1	GCGAGACGGTCACCAAATGG
GCDH	GCDH_Intron8_3	GTTCGATGCTCAGAGCCAGG
GFER	GFER_Intron1_1	CAGACGATCCAACCCACGCG
GFER	GFER_Intron1_2	TTACAGCCTTCATCCGCGCG
GFER	GFER_Intron1_3	TAAGGCCGGGCCTACCCGGG
GGPS1	GGPS1_Intron3_1	CGACAGCTATTAATTTCTTG
GGPS1	GGPS1_Intron3_2	GCGACAGCTATTAATTTCTT
GGPS1	GGPS1_Intron3_3	ACTAAATTCAATCAAGAACT
GNMT	GNMT_Intron4_2	GGCCCCAAGGTGGGTTACAG
GNMT	GNMT_Intron4_3	AGCCTCTGTAACCCACCTTG
GNMT	GNMT_Intron4_1	TGGGTTACAGAGGCTAATGC
GPX7	GPX7_Intron1_2	ATTGCCCCCTCATTACCAAG
GPX7	GPX7_Intron1_1	AAGGAACTGAGAAATGCACG
GPX7	GPX7_Intron1_3	GAGTCCAGTGAAGAACACTG
GPX8	GPX8_Intron1_3	GTTACAGCAGCCAGATACGT
GPX8	GPX8_Intron1_1	GGTTTCACTAGTTGTAAACG
GPX8	GPX8_Intron1_2	CTTATTTTGAAGGTCCACTG
GSTO1	GSTO1_Intron3_3	ATATACTGACCGTACTACCA
GSTO1	GSTO1_Intron3_1	GTAAAGACAACTAAGCGTTG
GSTO1	GSTO1_Intron3_2	TCAAGTTCCTGCGCTCACAG
H6PD	H6PD_Intron2_1	ACGGACATGTGTCACCCAGG
H6PD	H6PD_Intron2_3	GGATACTCTCACGATGAAGG
H6PD	H6PD_Intron2_2	CTGGGAAACAACGAGAACGG
HCCS	HCCS_Intron3_1	ACCAAGATTATCTTGCACAT
HCCS	HCCS_Intron3_2	TTTGAAGAGTCACATTACTG
HCCS	HCCS_Intron3_3	CCATGTTCTTAAACACACTG
HSD11B1	HSD11B1_Intron3_1	TATCGCAGATCTATATACAG
HSD11B1	HSD11B1_Intron3_2	GGCATTATGAGTGTAGATGC
HSD11B1	HSD11B1_Intron3_3	GATAAATCATCCCAGTGCTG
HSD11B1L	HSD11B1L_Intron3_1	CACCGGTCCCTGAGATAGAG
HSD11B1L	HSD11B1L_Intron3_2	GACGGGGCCAGAAACCCGGA
HSD11B1L	HSD11B1L_Intron3_3	CGGTCCCTGAGATAGAGGGG
HSD17B1	HSD17B1_Intron5_3	GTGCGTCCTCCGGCGCGCAG
HSD17B1	HSD17B1_Intron5_1	CGTCCTCCGGCGCGCAGCGG
HSD17B1	HSD17B1_Intron5_2	TGGCCACCGCTGCGCGCCGG
HSD3B7	HSD3B7_Intron5_2	TAGAGAAACCAGGACCTGCG
HSD3B7	HSD3B7_Intron5_1	GCCCTTGCAACACCACATCG
HSD3B7	HSD3B7_Intron5_3	AAGGAAGTAGCATCTACACA
HTR3D	HTR3D_Intron3_1	ACACGCGACACCTAAGTCGG
HTR3D	HTR3D_Intron3_2	CAGTCTTGCTAAGAGCACGT
HTR3D	HTR3D_Intron3_3	CGGATGCTGAAAGGGACGGG
HYKK	HYKK_Intron3_1	AGCATGTTCCTTGAACAACA
HYKK	HYKK_Intron3_3	ATGACCCATGTGTAAATGTG
HYKK	HYKK_Intron3_2	ACTGATAAGAGAATTATCAG
IAH1	IAH1_Intron1_1	TGTAACCGGGCATCTCAGCG
IAH1	IAH1_Intron1_2	CACGCCCGTGGAGACACCGG
IAH1	IAH1_Intron1_3	GCTCCAGGCACAGACGCGAG
INPP1	INPP1_Intron2_2	TGATGATACATCTGAGAGTG
INPP1	INPP1_Intron2_1	GGGACAGTACAAATCAACAA
INPP1	INPP1_Intron2_3	TCAATACTGTAATCATGACA
ISCA2	ISCA2_Intron2_2	GGCGGTACCCAGGCGATTGG
ISCA2	ISCA2_Intron2_3	GCGGTACCCAGGCGATTGGC
ISCA2	ISCA2_Intron2_1	GCTGCTCCCGCCAATCGCCT
IVD	IVD_Intron1_2	AGACAGCAAGTCTCAGCAGC
IVD	IVD_Intron1_3	TTGCTGTCTGCGTGCCTCGC
IVD	IVD_Intron1_1	TGCTGTCTGCGTGCCTCGCA
IYD	IYD_Intron4_3	ACCTGGATTGGTGACTATGA
IYD	IYD_Intron4_1	CATCAGACAACTATCCCCAG
IYD	IYD_Intron4_2	GCCTCTGAGCTCCTTCTACG
JADE3	JADE3_Intron3_1	AAAGCCCCTGAACCATACAG
JADE3	JADE3_Intron3_2	AAATACTCAAACCTCCACGA
JADE3	JADE3_Intron3_3	CATACCCTCCATCATCAGTG
JMJD7	JMJD7_Intron6_1	GAACAGGCACAAAAGATCTG
JMJD7	JMJD7_Intron6_2	TGTGGTGTTGACCTTTGGAA
JMJD7	JMJD7_Intron6_3	ACAGAGCCTGAAGTCCTGGG
LCLAT1	LCLAT1_Intron3_3	AGTAGCTACAGATATCCCAT
LCLAT1	LCLAT1_Intron3_1	CTAGAACGATGGCCTCCAAG
LCLAT1	LCLAT1_Intron3_2	GGATGGCTAAGCCTGTACTG
LDHA	LDHA_Intron2_1	CTATAGAGCTCGCTTCAGTG
LDHA	LDHA_Intron2_2	AAAAGGCCTCGTAACAACAC
LDHA	LDHA_Intron2_3	ATAGGCGGTTTGTAGGTGTG
LEP	LEP_Intron2_1	GCCCCGGGTAGTAACCACGG
LEP	LEP_Intron2_2	GATATCACACACTATTCACA
LEP	LEP_Intron2_3	GGAGCCCCGGGTAGTAACCA
LRAT	LRAT_Intron2_1	CCACAGAGTAGATTTCCCGG
LRAT	LRAT_Intron2_3	TAGAAGGATGCATTCCTCAG
LRAT	LRAT_Intron2_2	CAGCACGTAGAAGAATACAG
LRTOMT	LRTOMT_Intron4_1	TAGTCCAAGATCCCTAAGAG
LRTOMT	LRTOMT_Intron4_3	AATTGAGATCACCACACCAG
LRTOMT	LRTOMT_Intron4_2	AAATTGAGATCACCACACCA
LSR	LSR_Intron8_3	GGGCCCCCAGCCGGTCCCCG
LSR	LSR_Intron8_1	GAGCCGCGGGGACCGGCTGG
LSR	LSR_Intron8_2	AGGGTATGAGCCGCGGGGAC
LYPLAL1	LYPLAL1_Intron4_2	GTTACAAATTGAGTGATGCC
LYPLAL1	LYPLAL1_Intron4_1	GTGCTGTCTGAGGTATACAT
LYPLAL1	LYPLAL1_Intron4_3	GGAAAGGATAATCATGTGTG
MAN1B1	MAN1B1_Intron1_1	CGGAAACCGGAGGTTCCCCG
MAN1B1	MAN1B1_Intron1_2	CGAGGGGAGCATACACCACG
MAN1B1	MAN1B1_Intron1_3	AGGGCATTGATAACCACATG
MANBAL	MANBAL_Intron3_1	GGGGAATTACTGATACAATG
MANBAL	MANBAL_Intron3_3	CCACTCGGTGGACTTCAGGG
MANBAL	MANBAL_Intron3_2	AGATGGACAAGACAACCTAG
MANEA	MANEA_Intron3_1	ATAGTTCCTCACCATACACG
MANEA	MANEA_Intron3_2	CTATTCTGAATACAACTGAG
MANEA	MANEA_Intron3_3	GAGTGGTTGCAATCTCAGAG
METTL15	METTL15_Intron2_1	GGATGAGGTAGATCTCGTAG
METTL15	METTL15_Intron2_2	AAGAGCCCACATACGCACGG
METTL15	METTL15_Intron2_3	CCAGTCAAGAATTCTCACTG
METTL9	METTL9_Intron1_1	ATTCAACGAGACAACAAGAG
METTL9	METTL9_Intron1_2	AATGACACCCCTAAACTATG
METTL9	METTL9_Intron1_3	AGTTCAGAACGTGCACCAGG
MFSD3	MFSD3_Intron4_1	CACAAGAGAGACCACGGGGC
MFSD3	MFSD3_Intron4_2	ACCACGGGGCTGGGGCTGTG
MFSD3	MFSD3_Intron4_3	CCACGGGGCTGGGGCTGTGT
MGAM	MGAM_Intron4_1	ATGGTGGTAAAGCTTCTCCG
MGAM	MGAM_Intron4_2	TGGTACCTTGGTGAAAATGG
MGAM	MGAM_Intron4_3	TGATCAGATCAGTCTCAGGG
MGST1	MGST1_Intron2_1	AAGCACACATAAAAAGCGTG
MGST1	MGST1_Intron2_2	CTAGACACAGAATGTCACCA
MGST1	MGST1_Intron2_3	TCTGTGTCTAGAAGTCAGTG
MOGAT1	MOGAT1_Intron2_3	GCCCATAGCGCAAGGTAGAA
MOGAT1	MOGAT1_Intron2_1	CTGCATCAGCCCATAGCGCA
MOGAT1	MOGAT1_Intron2_2	TTGGAAACAGCTCCAACCCA
MOGAT2	MOGAT2_Intron2_1	TTACCCGTATGCATGATGCA
MOGAT2	MOGAT2_Intron2_3	CGGGGTGGGAGAAGTTACGT
MOGAT2	MOGAT2_Intron2_2	GTGTACTTACTAGATACATG
MRGBP	MRGBP_Intron2_1	ACCTCGAGTTCTCATCCACG
MRGBP	MRGBP_Intron2_3	AGCCGTGTAAGAGCCACTTG
MRGBP	MRGBP_Intron2_2	GTGTGGCCCTGAGTCCAACG
MSL1	MSL1_Intron6_3	CCGGTTCTACCTGAGTCTGT
MSL1	MSL1_Intron6_1	CAGACTCAGGTAGAACCGGA
MSL1	MSL1_Intron6_2	CAGACTCTTACAAAGTATGG
MSRA	MSRA_Intron5_3	AGGATCAGAGAAACTACCGG
MSRA	MSRA_Intron5_1	GACTCGGGTTCAGAACACTG
MSRA	MSRA_Intron5_2	GAAGCAGGCTGAAATCCACG
MSRB3	MSRB3_Intron6_1	CCGTGCGCGTACTCTCAGGG
MSRB3	MSRB3_Intron6_3	CTCATAAATAGACTCCAACG
MSRB3	MSRB3_Intron6_2	AGACACTTGTGTGTAAGTGG
MYOD1	MYOD1_Intron1_1	TTCTAATAGCGCCCCCAATG
MYOD1	MYOD1_Intron1_2	TTGGGGGGGTAATTACGGGT
MYOD1	MYOD1_Intron1_3	AAGGGCGGACAGTCACCAAG
NAA20	NAA20_Intron2_1	AGTAACCTGTTAGGTCCTAG
NAA20	NAA20_Intron2_3	ATGTCAGTAAGGATATCCCA
NAA20	NAA20_Intron2_2	GATGTGAAGATAGGATACTG
NAA60	NAA60_Intron2_3	CTGCCGCCAACACAAATCAG
NAA60	NAA60_Intron2_1	CCAGATATGTCAGTCCAGGG
NAA60	NAA60_Intron2_2	GTAATCCTAGCACTCCCGCG
NAALADL2	NAALADL2_Intron1_1	ATAGAACGATGACTACATGG
NAALADL2	NAALADL2_Intron1_3	TTACCTGTGAGAGCTCACGT
NAALADL2	NAALADL2_Intron1_2	GTTTGGCAGTGAACTCACTG
NAT14	NAT14_Intron2_1	TCAGTAGCAATGCCGCAGTG
NAT14	NAT14_Intron2_2	GAGGAGGTAGACCCTGCCCG
NAT14	NAT14_Intron2_3	CAGTGTGCCACACTGAACAT
NDUFAF2	NDUFAF2_Intron3_1	GTAATTAGCCAGAATCACGT
NDUFAF2	NDUFAF2_Intron3_2	ACTGTGGTGACAATCCACAT
NDUFAF2	NDUFAF2_Intron3_3	GTTATGAATTGCCATCCCAG
NDUFB2	NDUFB2_Intron2_1	CGGACAGCTGACCTACAGTG
NDUFB2	NDUFB2_Intron2_3	ATGTGGTAAAACCTCAGTTG
NDUFB2	NDUFB2_Intron2_2	CATATCATTAGCCTCAACTG
NDUFS4	NDUFS4_Intron2_1	GCCATGTAGACACATCAAGG
NDUFS4	NDUFS4_Intron2_2	ACACTTAGCAGACCTCAGTG
NDUFS4	NDUFS4_Intron2_3	CTTTTCAGACTCTGACACAG
NDUFS5	NDUFS5_Intron2_2	AAAAGGCCTTTCATCTTACG
NDUFS5	NDUFS5_Intron2_3	TGAGCTTATGCTATAGTGGG
NDUFS5	NDUFS5_Intron2_1	TAGCTTCTTCACTTACAGGG
NDUFV3	NDUFV3_Intron1_1	GCGGCCCCGAGCCTACGTAG
NDUFV3	NDUFV3_Intron1_3	GCCCAGGACTGACCGCCACG
NDUFV3	NDUFV3_Intron1_2	AGAGACGAGATCTGGCTACG
NEU2	NEU2_Intron1_1	CATCCGTGATGACCTCACGG
NEU2	NEU2_Intron1_3	CTGTGTAGTAATGACCACAA
NEU2	NEU2_Intron1_2	TCTGGGGAAACGTTGCAAGG
NEU3	NEU3_Intron2_1	TGTATAACTAGCCTCCACAG
NEU3	NEU3_Intron2_2	GATCCCAAATAGGCATACGT
NEU3	NEU3_Intron2_3	CCAGAAAACAGACTACTCAG
NSUN4	NSUN4_Intron1_2	GACACCTATAGCACTCCCAG
NSUN4	NSUN4_Intron1_3	ACCGGGCTGGAAAATCAATG
NSUN4	NSUN4_Intron1_1	GGTTCATTATAGCTTCTGCG
NTMT1	NTMT1_Intron2_2	GTCCACGGGTGTTTGGACTG
NTMT1	NTMT1_Intron2_1	CCAGGTAAACAACGGCAGAG
NTMT1	NTMT1_Intron2_3	GCTCCTGTCTGGTAACCCTG
NUDT16	NUDT16_Intron1_3	GAGCCCCGCACCCTCTCTGG
NUDT16	NUDT16_Intron1_1	CCCAGAGGAGACCACCAGAG
NUDT16	NUDT16_Intron1_2	GATTGGCAGGGGCGCCCCAG
NUDT19	NUDT19_Intron1_1	TGTGCCACATGGTACAACGG
NUDT19	NUDT19_Intron1_3	GATTGCTGGACACCATACCA
NUDT19	NUDT19_Intron1_2	TAAACCAGGGCAGACCCCTG
OLAH	OLAH_Intron6_2	ACGCCAGGAATAGTACCAGT
OLAH	OLAH_Intron6_1	TGGTGGGGATACTAATAGGT
OLAH	OLAH_Intron6_3	GATCTTTCTCCAGATGAAGT
ORAI2	ORAI2_Intron3_2	AGTGTGAAGAACGATCTGAC
ORAI2	ORAI2_Intron3_1	CTAATCAAGCAGGTGCACTG
ORAI2	ORAI2_Intron3_3	AAGCACGTGTTGCTAGACAA
ORAI3	ORAI3_Intron1_2	AATGGACCCTACAAGAACCA
ORAI3	ORAI3_Intron1_3	ACCAACCCTATAAGGCAGGG
ORAI3	ORAI3_Intron1_1	TGGGGTTGACTGCAACAGTG
PAOX	PAOX_Intron6_3	CTTAGCGATGAGAATCAGCT
PAOX	PAOX_Intron6_1	TTATTAAGCATGACTCACAC
PAOX	PAOX_Intron6_2	ACAGGCACCAAAATATCCTG
PCK1	PCK1_Intron5_1	GGGCTGAAGTACCAACCTCG
PCK1	PCK1_Intron5_3	AGAGAGGTGTGCTGACGGGT
PCK1	PCK1_Intron5_2	AGGTTGGTACTTCAGCCCAG
PCK2	PCK2_Intron5_1	GCAGCTAGGGTCTAATAGGG
PCK2	PCK2_Intron5_3	GGTCACCAAAAGTCAGGGCA
PCK2	PCK2_Intron5_2	CCTCAACATTCAGCAGCCTG
PDE12	PDE12_Intron1_2	TGCCTTGAACAAGACTAGCA
PDE12	PDE12_Intron1_1	AGTCCTAGTTCATCAAGGGA
PDE12	PDE12_Intron1_3	AGTGCTTACAATCTAGCGAG
PGAM1	PGAM1_Intron2_1	AGTAAGTGAAGGTCATTCAC
PGAM1	PGAM1_Intron2_2	CCATATCTTCTAGTAAGTGA
PGAM1	PGAM1_Intron2_3	TTGGCCCATTCACATTCACA
PGAM5	PGAM5_Intron4_1	CCCGAGCACTTCCGCACTGA
PGAM5	PGAM5_Intron4_2	ACAGACCCCATCGCCGCCCG
PGAM5	PGAM5_Intron4_3	GGCTTCCCCGGGCGGCGATG
PLA1A	PLA1A_Intron3_2	TGCCACGACACATTTTACAG
PLA1A	PLA1A_Intron3_3	AAGTATGTGAGTAACGACCA
PLA1A	PLA1A_Intron3_1	AGAGTCACCAGGTAGCTCGG
PLCXD2	PLCXD2_Intron2_1	AAATGTCTTCGACACCACGG
PLCXD2	PLCXD2_Intron2_2	ATGATAAGCAGATTGCCTGG
PLCXD2	PLCXD2_Intron2_3	TGGAACAGACTATCCCTGAG
PLPP4	PLPP4_Intron2_2	AAAAGGTTACAACTGCCATG
PLPP4	PLPP4_Intron2_3	GCCATGTGGCAATTGCCATG
PLPP4	PLPP4_Intron2_1	TCACCAAGGAAGCATCACAG
PNP	PNP_Intron3_3	AGATAGCTAGGTAGTGAAAG
PNP	PNP_Intron3_2	ACTACCTAGCTATCTGGGCT
PNP	PNP_Intron3_1	ACCTAGCTATCTGGGCTAGG
PPCS	PPCS_Intron1_3	ATGCAAATAGTCCGCCAAAG
PPCS	PPCS_Intron1_2	GTGGTGTTGGTTACGTCAGG
PPCS	PPCS_Intron1_1	GAACAGGACCCCGTAGCCGG
PRDM6	PRDM6_Intron3_1	CTAGTGCATAGGGACCACGT
PRDM6	PRDM6_Intron3_2	CATAACTTATGGAACCCTGG
PRDM6	PRDM6_Intron3_3	TGCATGAGTCATTCACATGG
PRIM2	PRIM2_Intron3_1	GCATGTCTGGAAATATGTAG
PRIM2	PRIM2_Intron3_3	TATCTAGAATAGCAGCATGG
PRIM2	PRIM2_Intron3_2	TATGTATTGAGTGTCACTTG
PTER	PTER_Intron1_1	AGACTGTGGTGCCAATACTG
PTER	PTER_Intron1_2	TCCAGGGTGAAAAAAAATCG
PTER	PTER_Intron1_3	TGAGGTTTACAAATAGACTG
QRSL1	QRSL1_Intron1_3	AGTACACCCGAAGAATCGAA
QRSL1	QRSL1_Intron1_2	CAGTTCTAGAGGAAGCAGCG
QRSL1	QRSL1_Intron1_1	GCAGGGAAATCTCTGCACCG
SAT1	SAT1_Intron1_1	GTGGGGTGATTCACGTCTTG
SAT1	SAT1_Intron1_2	GACGTGAATCACCCCACTCT
SAT1	SAT1_Intron1_3	TCACGTCTTGAGGTCTCGGC
SETDB2	SETDB2_Intron10_1	TGGAAACATGTCAACTGCCG
SETDB2	SETDB2_Intron10_3	TGATTGACACTTGATGAAAG
SETDB2	SETDB2_Intron10_2	TGTGCTCCACTGAGACCGAG
SIRT4	SIRT4_Intron3_3	TCCCAATCCCGCACAAGGGG
SIRT4	SIRT4_Intron3_1	GGACTCCCAATCCCGCACAA
SIRT4	SIRT4_Intron3_2	AGGACTCCCAATCCCGCACA
SMPDL3B	SMPDL3B_Intron5_1	TGGTTGTGTGATATGCTACA
SMPDL3B	SMPDL3B_Intron5_2	AGTGGGACATGGAATCCGGG
SMPDL3B	SMPDL3B_Intron5_3	CAAAGATGCCCATATCCCAG
SPHK1	SPHK1_Intron4_1	GACGCACCGCGCCAAGCCCC
SPHK1	SPHK1_Intron4_2	GGCTTGGCGCGGTGCGTCCC
SPHK1	SPHK1_Intron4_3	GCGCGGTGCGTCCCAGGCTG
SUOX	SUOX_Intron4_2	TCAGTCCTAGTAAACTCCAC
SUOX	SUOX_Intron4_3	GTAAACTCCACAGGCAACCC
SUOX	SUOX_Intron4_1	GACGCAGTCTTCATGCACAG
TADA2B	TADA2B_Intron1_1	ACCAGCGCGAGGTTACGGTG
TADA2B	TADA2B_Intron1_3	GCGTTCACTGCACATCACGG
TADA2B	TADA2B_Intron1_2	CTGGTGAACAATGAAACGGA
TALDO1	TALDO1_Intron7_1	GGACCCACCAAGCATCCTGG
TALDO1	TALDO1_Intron7_3	CAGCACGTGAATGAGACCTG
TALDO1	TALDO1_Intron7_2	CAATACCACAGTCACCACAC
TCN2	TCN2_Intron5_2	CCACCCTGGGGAACAGTCAG
TCN2	TCN2_Intron5_3	CCCTGGGGAACAGTCAGGGG
TCN2	TCN2_Intron5_1	CCACCCCTGACTGTTCCCCA
THEM6	THEM6_Intron1_2	CTACAGAACCGGAACCATGG
THEM6	THEM6_Intron1_1	TCGATGATGTGGAAAGACCG
THEM6	THEM6_Intron1_3	GACAGAACAAGCATTCAAGG
TRUB1	TRUB1_Intron3_1	CTCGACTAAGCATACCACAG
TRUB1	TRUB1_Intron3_2	AGGGTCAATGAAAATGCACG
TRUB1	TRUB1_Intron3_3	TAGTCTGCAAGATTGCACCA
TWNK	TWNK_Intron4_3	AGACGATTAAGGCTGAATGA
TWNK	TWNK_Intron4_2	TGTCCATCCGAACAGGCAGG
TWNK	TWNK_Intron4_1	TTTGAGTGGCCCCAGCATCG
TXNDC15	TXNDC15_Intron2_1	GTAATATTAGGAAAGCGCAG
TXNDC15	TXNDC15_Intron2_2	ATGTGCTACTCCATCCAGTG
TXNDC15	TXNDC15_Intron2_3	CCTCACGATAGAAATCCCAG
TXNDC17	TXNDC17_Intron3_3	TCTAGTTCAGTCATGCCCCT
TXNDC17	TXNDC17_Intron3_2	AGACTTAAACCCCAAATACC
TXNDC17	TXNDC17_Intron3_1	AGCAGCACTCTGAACAACAA
TYR	TYR_Intron1_1	TCTAGCATGTGCAAACCCCG
TYR	TYR_Intron1_2	GATTTATAACATATGCTGGG
TYR	TYR_Intron1_3	TGTGGTGTAAATACTGACAA
UBE2A	UBE2A_Intron5_1	CATTAAGACCCAAGTCAGCT
UBE2A	UBE2A_Intron5_3	CTAGCAGATTCACATAACTC
UBE2A	UBE2A_Intron5_2	TAGCAGATTCACATAACTCT
UBE2B	UBE2B_Intron5_1	GAGACGTTCTCATTAAACCA
UBE2B	UBE2B_Intron5_2	AGTTGTTCTTTATACCAACA
UBE2B	UBE2B_Intron5_3	GTTGTTCTTTATACCAACAG
UBE2E1	UBE2E1_Intron4_1	ATGTTTTTGAACCTTTCTCG
UBE2E1	UBE2E1_Intron4_2	TCTACCTAATCCCCAAGACG
UBE2E1	UBE2E1_Intron4_3	TGTTCATTGATACCATCTCA
UGT8	UGT8_Intron2_1	GGAAGTTAGTATCCACCACG
UGT8	UGT8_Intron2_2	AGGGGAAACTTAAGACCACG
UGT8	UGT8_Intron2_3	AGAGCCACGACAATACCTGG
UQCR10	UQCR10_Intron1_1	GTTAGACACCTTAGACGCCG
UQCR10	UQCR10_Intron1_3	TGGTCCTTGTCACTTAACTG
UQCR10	UQCR10_Intron1_2	TTATGCATGAAGGCTCGGCG
VEGFA	VEGFA_Intron3_1	CATCTCAGCCCAGATAGGGT
VEGFA	VEGFA_Intron3_2	AATCTAGCCAGGAAACGACC
VEGFA	VEGFA_Intron3_3	ACCTCCCCTGTGCAACTCAG
WRNIP1	WRNIP1_Intron5_1	GGAAACCTTCTGTGTCAACG
WRNIP1	WRNIP1_Intron5_3	AGACTCTTAGACTCCTAGAG
WRNIP1	WRNIP1_Intron5_2	CAGACTGTAGGCGCAAAAGG
WWOX	WWOX_Intron5_1	CAACAGCTGAGAATCCACGG
WWOX	WWOX_Intron5_2	TAGCATTACCTTAATCACAG
WWOX	WWOX_Intron5_3	TGCAGTGTGTAAAATCATGG
ZNF274	ZNF274_Intron6_3	CATACATACCACTACCCCAG
ZNF274	ZNF274_Intron6_2	GCATCACTGGAGACAACGCA
ZNF274	ZNF274_Intron6_1	TCCTGATGCGCTGACCACTG
ZNF304	ZNF304_Intron1_1	TAGGGATTATAGGGTAGACG
ZNF304	ZNF304_Intron1_3	TGGCCGAGGTGTCTTGAGTG
ZNF304	ZNF304_Intron1_2	GGGGTATCTTCAAATCATGG
ZNHIT1	ZNHIT1_Intron3_2	CACGCAGCGAACACCTGCCC
ZNHIT1	ZNHIT1_Intron3_1	CCGGGCAGGTGTTCGCTGCG
ZNHIT1	ZNHIT1_Intron3_3	CGGGCAGGTGTTCGCTGCGT
A4GNT	A4GNT_Intron2_1	GTATGAGTCATTCTTCAACG
A4GNT	A4GNT_Intron2_3	AGATGATGGTGCTAACAGTG
A4GNT	A4GNT_Intron2_2	TTGGGATGTAGAAGTCACTG
ABHD8	ABHD8_Intron4_1	CCCTGGATACTAGCCCGGCG
ABHD8	ABHD8_Intron4_2	CATACAAATCCTCCGCTGTG
ABHD8	ABHD8_Intron4_3	GGGCGTGCTTTCTTCCCGAG
ACBD3	ACBD3_Intron5_1	TAACCTCACAGGACTATCAG
ACBD3	ACBD3_Intron5_3	ATGGTATCAGATGTACTCCA
ACBD3	ACBD3_Intron5_2	AAAGCCTTTATGATCCCATG
ACBD7	ACBD7_Intron1_1	AGCCTAAATAACCTTGAACG
ACBD7	ACBD7_Intron1_3	GCACAAAATTTCATAGAACG
ACBD7	ACBD7_Intron1_2	CATGTAGTAAAGTTGGACTG
ACER1	ACER1_Intron1_3	AGTCTGATGTCAGCACGTCG
ACER1	ACER1_Intron1_1	GCATAGAACTAAGCACTACG
ACER1	ACER1_Intron1_2	GTGGAGATACTGACTAATGG
ACHE	ACHE_Intron2_3	GAGATGAACAGTTACAGACC
ACHE	ACHE_Intron2_2	GAGGGACCGTTGGGACCCAG
ACHE	ACHE_Intron2_1	TGGGATCTGAGCCCTCAGGG
ACVR1C	ACVR1C_Intron8_1	AGATTCCTTACCCCTCTGAG
ACVR1C	ACVR1C_Intron8_2	ACCATGTGACAAGTTCTGGT
ACVR1C	ACVR1C_Intron8_3	TGCTGTGCATGCATAATGCT
ACYP1	ACYP1_Intron2_1	GCTGTGCAATCGGTAAAACA
ACYP1	ACYP1_Intron2_2	GACTCCGCATCCAACTGACA
ACYP1	ACYP1_Intron2_3	TGCCACAACGGCGAGCACTG
AGA	AGA_Intron4_1	TATGCACCCAATGCAGCTAG
AGA	AGA_Intron4_2	TCATAAAACGAAGTTAGGGG
AGA	AGA_Intron4_3	CATGTCTAGTATGTTACCAG
AGPAT2	AGPAT2_Intron3_1	GGGTACTCGCAACGACAATG
AGPAT2	AGPAT2_Intron3_2	TGGGGGTGATCATTAACCCG
AGPAT2	AGPAT2_Intron3_3	AAAGTGTGGATCTATCCCGA
AK3	AK3_Intron3_1	ACCTTTCGCACCAAGCTCAG
AK3	AK3_Intron3_2	TAACCTGAGAATATACCCTC
AK3	AK3_Intron3_3	TGCAAGTCCTAAATAAACCA
ALAS2	ALAS2_Intron9_1	CCCCCGCCAAGCCAATTCTG
ALAS2	ALAS2_Intron9_2	TGGAGTACATCACATACTAA
ALAS2	ALAS2_Intron9_3	TTGTGTGAGTCAGTAAGCCA
ALG2	ALG2_Intron1_1	GCCCCAAAGACTATCTACCT
ALG2	ALG2_Intron1_2	TGGGTCATAGGGTGATTCCG
ALG2	ALG2_Intron1_3	TCTCTCAGGGGTCATGCCCG
ALKBH8	ALKBH8_Intron2_1	ACCTCATTAAGTGAGGTCCA
ALKBH8	ALKBH8_Intron2_2	CAAGTGCGGTAGAAGAGGAG
ALKBH8	ALKBH8_Intron2_3	TGGAATCTAACAATCTAATG
AMACR	AMACR_Intron3_1	CTAACGCCGAATCAATAGGG
AMACR	AMACR_Intron3_2	GAGCGACTAGTGTAGCCCTG
AMACR	AMACR_Intron3_3	GAATTGATAATGGACTGACA
APOBEC1	APOBEC1_Intron4_1	AAACCGATCTAAGATATGGG
APOBEC1	APOBEC1_Intron4_3	CCACTTTCAAGAGAATCCAA
APOBEC1	APOBEC1_Intron4_2	AGGATCTTGTTATACCACGC
APRT	APRT_Intron3_3	ACAAAGCTGTTTTCTGCGGG
APRT	APRT_Intron3_1	GGGAAGGCCTTTTAGAACTG
APRT	APRT_Intron3_2	GAGAGGTTGAGACATAGGCT
ASPDH	ASPDH_Intron2_3	ACGCCGTGTTTGTGGCCCGA
ASPDH	ASPDH_Intron2_2	CGCCGTGTTTGTGGCCCGAG
ASPDH	ASPDH_Intron2_1	GAAGGATATCCACTTCAGGG
AWAT2	AWAT2_Intron3_2	TGCACATTGGGCAACCTGCA
AWAT2	AWAT2_Intron3_1	CCAACTGCTAGCACTGAAGT
AWAT2	AWAT2_Intron3_3	CATTCTCAAGAGGCTCAATG
B4GALT1	B4GALT1_Intron2_2	TTGTTGGAAAGTGCTCAACG
B4GALT1	B4GALT1_Intron2_1	TGGGGTTACAGTGTACACCG
B4GALT1	B4GALT1_Intron2_3	GGTGAAATGCTGTAACACTG
B4GALT3	B4GALT3_Intron4_1	ATTGGCAACCAACAATGGTG
B4GALT3	B4GALT3_Intron4_3	CAACCAACAATGGTGTGGTG
B4GALT3	B4GALT3_Intron4_2	TAGGTGGCACGGAGAAAAGG
B4GALT4	B4GALT4_Intron5_3	CTCAATGGGGATCTAGACAG
B4GALT4	B4GALT4_Intron5_1	TCAACCATAGCAACTCAATG
B4GALT4	B4GALT4_Intron5_2	TTATCCTTGGCCATCCAAGG
BAAT	BAAT_Intron3_1	TTTATGATGCTCCAATCATC
BEND3	BEND3_Intron3_2	GGATAGACTCAGGAACAACG
BEND3	BEND3_Intron3_1	TCTGCCCTAACATCCAACAG
BEND3	BEND3_Intron3_3	GGACCAAGGACATACCAGAG
CASP1	CASP1_Intron3_2	ATAGATTGGATTAGGCTCCT
CASP1	CASP1_Intron3_1	GCATTGAATGACCCTCCTCA
CASP1	CASP1_Intron3_3	AGCAGATTTAAAATGCCCTG
CASP3	CASP3_Intron6_3	CTCAACTGTAAATTATCCAA
CASP3	CASP3_Intron6_1	GGTTATTGACGATTAAGCAG
CASP3	CASP3_Intron6_2	TGGTTATTGACGATTAAGCA
CASP6	CASP6_Intron5_2	AAAACCGAGGGGCACCCATG
CASP6	CASP6_Intron5_1	AGGAGCATAAAACAAAACCG
CASP6	CASP6_Intron5_3	GAGCATAAAACAAAACCGAG
CDIPT	CDIPT_Intron4_1	CCTAGCCTAGGAGAAGGCGA
CDIPT	CDIPT_Intron4_3	GCCCGTAAGCTGAGGCGTGG
CDIPT	CDIPT_Intron4_2	GGCCTGTGTGAATTACTCCA
CDO1	CDO1_Intron4_1	CAACCAACACTAATATAGCA
CDO1	CDO1_Intron4_2	TGCCATGACTTACTATGCAT
CDO1	CDO1_Intron4_3	TTATTGCGGGAAAAACAACA
CERK	CERK_Intron11_1	CCCGAGTCTAGTCATGTTGG
CERK	CERK_Intron11_2	CCCCCAACATGACTAGACTC
CERK	CERK_Intron11_3	TTCCTACAACACATAAACCA
CERKL	CERKL_Intron12_1	GGACATAGGAAAAGGCATCG
CERKL	CERKL_Intron12_2	ATTTTCTCATGTACTCTACG
CERKL	CERKL_Intron12_3	AAGGCCAGTGAATCACACAC
CHST10	CHST10_Intron4_2	TTAACAACCTGTCCTCCCAG
CHST10	CHST10_Intron4_1	TGTCACTCTGTAGACAGACA
CHST10	CHST10_Intron4_3	TGGAACTATCAGGATGACAG
CHSY1	CHSY1_Intron2_2	CCATGATGGCTAATTCACAG
CHSY1	CHSY1_Intron2_3	GGAATGTGAGGAGACCTAAG
CHSY1	CHSY1_Intron2_1	ATTCTGCAAGCAGACCCATG
CMBL	CMBL_Intron5_1	GCACGGTTTGACATTCTGCG
CMBL	CMBL_Intron5_2	CCACTTATATAATTCCAGTG
CMBL	CMBL_Intron5_3	AGCATGGCCTGGTTACCTGG
CMPK2	CMPK2_Intron1_1	GCACAAGGTTCATGGCCAGT
CMPK2	CMPK2_Intron1_2	CGGAAATAAACAAACCACCC
CMPK2	CMPK2_Intron1_3	ATGGGAAATCAGCTGCACAG
COPRS	COPRS_Intron1_2	TGTACCGGCTAGGTGCTGAG
COPRS	COPRS_Intron1_1	CACCTCATGACACTTCACCG
COPRS	COPRS_Intron1_3	AGGTTGGTAGCTGTTCCCTG
COX5A	COX5A_Intron3_1	GTTACACCTGTGCTGTCACA
COX5A	COX5A_Intron3_2	AAATGAGTGGGCTATTGCTG
COX5A	COX5A_Intron3_3	TTACTTATGCAGAGGCAGGT
COX6A2	COX6A2_Intron2_2	GCGCGTGAGCGCCGTGAGTC
COX6A2	COX6A2_Intron2_1	GGGCGCGGACTCCGGACTCA
COX6A2	COX6A2_Intron2_3	TGCGGGGGGGGGGTCGCGCG
COX6B2	COX6B2_Intron3_1	GCGGGACGCCGGCTCAGCCT
COX6B2	COX6B2_Intron3_3	GCGTGTGCAGGGCTCGGCCG
COX6B2	COX6B2_Intron3_2	CGCCGGGCCAGGCGTGTGCA
COX6C	COX6C_Intron2_1	TAGCTGCCCCTCTATCCATG
COX6C	COX6C_Intron2_3	CTATAGTTCCTGTCACACTG
COX6C	COX6C_Intron2_2	CTACAGATATATGCCCACAG
CSGALNACT1	CSGALNACT1_Intron8_2	CCGGGAAATTCCATCCATGG
CSGALNACT1	CSGALNACT1_Intron8_1	GCTCCCAAAAGCATCTACCG
CSGALNACT1	CSGALNACT1_Intron8_3	AGTATTACGTGAGATAACGT
CYB561	CYB561_Intron4_1	CAGTCGCCACGTGGGCACGT
CYB561	CYB561_Intron4_2	GGGGCTCACAGTCGCCACGT
CYB561	CYB561_Intron4_3	AGAAATCAGGCCCTTCCATG
CYBA	CYBA_Intron5_1	TATTCGCGCTGATTCATGGG
CYBA	CYBA_Intron5_3	CTAAAGGAGAGTTCTGCCGG
CYBA	CYBA_Intron5_2	GATACAGTGATCTCTCTGAG
CYP1A1	CYP1A1_Intron2_1	TGCATGTAATGACTCTTCAG
CYP1A1	CYP1A1_Intron2_3	AAGGTAAGAGGAACTGCATG
CYP1A1	CYP1A1_Intron2_2	TCTGGAGGTGATGCCCCCTG
CYP2R1	CYP2R1_Intron1_1	TTTACAGGTAATTCTCAACG
CYP2R1	CYP2R1_Intron1_3	CTGGACCTGAAGTGGCGGCG
CYP2R1	CYP2R1_Intron1_2	AGGTCATGAGGACTGCCAAG
CYP7B1	CYP7B1_Intron5_1	CAATCATTAGAGGAACAGTG
CYP7B1	CYP7B1_Intron5_3	TGAATGTGCTAACCTCTGAG
CYP7B1	CYP7B1_Intron5_2	GAGCAATGGCAAATTCTCTG
DCTD	DCTD_Intron2_1	GGGTGCTGCCACAAAAAACC
DCTD	DCTD_Intron2_2	GCACAAGAGGCAGTTAACAA
DCTD	DCTD_Intron2_3	TACTGCACATGAGCAGAAAG
DEGS2	DEGS2_Intron2_1	ACACCCTGTCAGTATCATGG
DEGS2	DEGS2_Intron2_2	ATGCCGCCATGATACTGACA
DEGS2	DEGS2_Intron2_3	AGGCTGAAGCAAATTCAGGG
DHFR	DHFR_Intron4_2	AGTTCTTGTAAGCAAACTGG
DHFR	DHFR_Intron4_3	CTACAAGCTGTTGTGATGTG
DHFR	DHFR_Intron4_1	TTACCACAAGACCACCCACA
DHRS13	DHRS13_Intron2_2	GGAACTCCTTTGTGGCTGCG
DHRS13	DHRS13_Intron2_3	GAAGGCGCACCAGAGCCGAG
DHRS13	DHRS13_Intron2_1	GAGTGTACTAGATAAGTGTG
DHRS7C	DHRS7C_Intron2_3	GCTGGCTCAAAGTAATTCGG
DHRS7C	DHRS7C_Intron2_2	TATGTAACTCAAACTCAACA
DHRS7C	DHRS7C_Intron2_1	GAAACTTGGTGATTGCTCTG
DNASE2	DNASE2_Intron2_3	ACGTGAAATTCCTCCCAGGC
DNASE2	DNASE2_Intron2_1	CGTGAAATTCCTCCCAGGCA
DNASE2	DNASE2_Intron2_2	CAACTAGGGGCGAAACTCTA
DOHH	DOHH_Intron3_3	GAAAGGAACATGCATGTCCG
DOHH	DOHH_Intron3_2	AGCATGGGCCGTCCACACCA
DOHH	DOHH_Intron3_1	AGGAACATGCATGTCCGTGG
EBPL	EBPL_Intron1_1	GTAACACTTACCTCACACGT
EBPL	EBPL_Intron1_2	GTATAACATATCGGACACAG
EBPL	EBPL_Intron1_3	GCTACCATGGAACTTAACAG
EHHADH	EHHADH_Intron3_1	GCTGTTACGTGCCAGTACAG
EHHADH	EHHADH_Intron3_2	GTACTGGAGGTAGAGTCTCG
EHHADH	EHHADH_Intron3_3	AGACAGGCCTCACATATGTG
ELK4	ELK4_Intron2_2	AAGGAATCGTTCTTGTCTGG
ELK4	ELK4_Intron2_1	GGTTTCACCATCTCTACGGG
ELK4	ELK4_Intron2_3	GCAGTCTCAAACAATTCCAA
ETNK2	ETNK2_Intron3_1	GGGCAGAGCTAGTTCTACCG
ETNK2	ETNK2_Intron3_3	TAGAGTCGGAAACAGGCATG
ETNK2	ETNK2_Intron3_2	GGTCTCCCTAGCACAAGCTG
EXTL2	EXTL2_Intron4_2	AGTACTTAACCACGGCAACA
EXTL2	EXTL2_Intron4_1	TCTTGACTAGTACTTAACCA
EXTL2	EXTL2_Intron4_3	TACCTGAAACCGGAACTGCA
FHIT	FHIT_Intron1_3	CCCGTTAGTCAGGCTCATAG
FHIT	FHIT_Intron1_2	TCACCTTAGACACTATCCCA
FHIT	FHIT_Intron1_1	GTACTTTCGTATATGCAATG
FKBP11	FKBP11_Intron1_1	CAACAAGGCTCGGCCCACGG
FKBP11	FKBP11_Intron1_2	CCCAGTATTACCACCCAACA
FKBP11	FKBP11_Intron1_3	CTTGTTGGGTGGTAATACTG
FKBP14	FKBP14_Intron3_2	ATGTGACTGGTAATACTATG
FKBP14	FKBP14_Intron3_1	GATATTGATTGGCTCAATGT
FKBP14	FKBP14_Intron3_3	AGCCCTGCTGTGTAAAACCC
FOXO1	FOXO1_Intron1_1	GAATATGGATGTACAAACGG
FOXO1	FOXO1_Intron1_2	GTTTAGTATTGATCACACGG
FOXO1	FOXO1_Intron1_3	TTAGACAAGTCACATCACTG
GAL3ST4	GAL3ST4_Intron3_1	TGGGCTCCCAGAAACTACTG
GAL3ST4	GAL3ST4_Intron3_3	TTAGGGTGAGATGATGCCTG
GAL3ST4	GAL3ST4_Intron3_2	TGGGGGTAGAAGTTCCACAG
GBA2	GBA2_Intron1_3	TATACTTACTTCCCACCTCC
GBA2	GBA2_Intron1_1	ATACTTACTTCCCACCTCCA
GBA2	GBA2_Intron1_2	GAAAAATGGGTTTTCCCTGG
GCH1	GCH1_Intron2_2	CCGACTATGTAGAACAAGAG
GCH1	GCH1_Intron2_3	AGGTTCTTGCCAAGCCATGG
GCH1	GCH1_Intron2_1	GGTGGGATCTTAAGGCTGTG
GCSH	GCSH_Intron2_1	ACAGAAGGACGCAATCCCCG
GCSH	GCSH_Intron2_3	GTGATACACACGTGACCAGG
GCSH	GCSH_Intron2_2	ATGATGGCATCGGAACGGTG
GLO1	GLO1_Intron1_1	ATACGAGTGGATTACCACTG
GLO1	GLO1_Intron1_3	GGACTGTGTTCCTTACTCAG
GLO1	GLO1_Intron1_2	TCTGTTAGGAAGCACCAGTG
GLUL	GLUL_Intron6_3	CCCAAAACCTAAGAACGGGT
GLUL	GLUL_Intron6_1	CATAGGACTTTTGCTAGTAA
GLUL	GLUL_Intron6_2	AAGGGTAGGTAGGTGTACAT
GNE	GNE_Intron7_2	AGCAGTCATCTAAGACTGCG
GNE	GNE_Intron7_3	AACTACTTGAGCTTACCCCA
GNE	GNE_Intron7_1	CAAGACGGTAGACTTGACAG
GNPDA1	GNPDA1_Intron5_3	TAATCTTCAATCAGTACGTG
GNPDA1	GNPDA1_Intron5_1	AATGGTGGGAGTTATCTGTG
GNPDA1	GNPDA1_Intron5_2	TTTATCACACAAATAACCCG
GNPDA2	GNPDA2_Intron5_2	CCTGGCATTACCATTATGAA
GNPDA2	GNPDA2_Intron5_1	GAACTGTCTTATAAGCACAT
GNPDA2	GNPDA2_Intron5_3	AAATAGTACCTCAAAAGTGG
GNPNAT1	GNPNAT1_Intron4_2	CACACTTAGGAATTTCGGTG
GNPNAT1	GNPNAT1_Intron4_1	GAAACAAATTTATGCTAACG
GNPNAT1	GNPNAT1_Intron4_3	AATCTGAACCCTTTACCATG
GPX2	GPX2_Intron1_3	CCCCTTAGTTCAATTCACAG
GPX2	GPX2_Intron1_1	CCACTGTGAATTGAACTAAG
GPX2	GPX2_Intron1_2	TAGGTGCATGTAATGCCCAG
GTDC1	GTDC1_Intron7_2	TAAGGTTACCTCAGCTCACA
GTDC1	GTDC1_Intron7_1	TTAAACATCCTTGTGAGCTG
GTDC1	GTDC1_Intron7_3	CTTAAATAATGTAAAACACG
HDAC8	HDAC8_Intron1_3	GGGACGTCCAATGGACAGGT
HDAC8	HDAC8_Intron1_1	TCAGGATGGTGAGATTGACG
HDAC8	HDAC8_Intron1_2	GACGCAGTTTCCACTCATAG
HDHD2	HDHD2_Intron5_3	GGCTAGCTTACTGAAGACAC
HDHD2	HDHD2_Intron5_1	CTGGCCACCAATTTACCATG
HDHD2	HDHD2_Intron5_2	AACATTTGCCTAGTACACTG
HMGCS1	HMGCS1_Intron10_1	ACAAGTAAAATACTGTTACG
HMGCS1	HMGCS1_Intron10_3	AGTAAAATACTGTTACGTGG
HMGCS1	HMGCS1_Intron10_2	GGAGGCTCATCTCTAAAGGG
IDH1	IDH1_Intron4_3	CGTCCTTACTTAGGCCATCG
IDH1	IDH1_Intron4_1	CAATACTAATTGTAGTACTG
IDH1	IDH1_Intron4_2	ACAGTCCATGAATCAACCTG
IDI1	IDI1_Intron4_1	GGGCTAACTCATAACTCCGG
IDI1	IDI1_Intron4_2	GTGGGGCTAACTCATAACTC
IDI1	IDI1_Intron4_3	TCAAAACTTAGCTCAATACG
IDI2	IDI2_Intron4_1	AACGCTAGCCGGTTTCTACG
IDI2	IDI2_Intron4_3	CTCAAGAACACGTTTAAGAG
IDI2	IDI2_Intron4_2	CTGTCGACCACACACCGAAG
IGF2	IGF2_Intron3_3	CAAGTCACTGATCAGTCACA
IGF2	IGF2_Intron3_1	TCACTGATCAGTCACAGGGG
IGF2	IGF2_Intron3_2	AAGTCACTGATCAGTCACAG
IMPAD1	IMPAD1_Intron1_3	AGACGTATCATAGAATAGGG
IMPAD1	IMPAD1_Intron1_1	GCCTCTAGCCTATAACACAG
IMPAD1	IMPAD1_Intron1_2	GGTATGATAGGCACTGTGTG
INPP5B	INPP5B_Intron1_3	ATGGTTTGAGTGCTCACCCA
INPP5B	INPP5B_Intron1_1	TCTCCCCTGATGGTTCAGAG
INPP5B	INPP5B_Intron1_2	CTGCCCCTCTGAACCATCAG
IP6K1	IP6K1_Intron5_1	ACAAGATGTTCCGATGTTGG
IP6K1	IP6K1_Intron5_2	GTCAACAGGTAAGGACAGAG
IP6K1	IP6K1_Intron5_3	TCTTATTTGTCCCAATGTCG
IP6K2	IP6K2_Intron5_1	GAGCAAACAGGACTATACCA
IP6K2	IP6K2_Intron5_3	CAAACAGGACTATACCAGGG
IP6K2	IP6K2_Intron5_2	GGGGCACAATGACCAAACCC
IP6K3	IP6K3_Intron5_2	GAGATATCCTTGCCCCACCG
IP6K3	IP6K3_Intron5_3	GAGGTGACCCTCCACCCACG
IP6K3	IP6K3_Intron5_1	TGGTGGCCAAGACACAACAG
JMJD6	JMJD6_Intron1_1	GGTGCGGGTGAGCCTCTACG
JMJD6	JMJD6_Intron1_2	GGGTGGCTCTAGGAACGACG
JMJD6	JMJD6_Intron1_3	CGGGGACCCCAAACTCCGCG
KDM5C	KDM5C_Intron1_3	CCCGGGCTAAGAGATGTGCG
KDM5C	KDM5C_Intron1_1	GCCGGAGGGAGTTCACAGAG
KDM5C	KDM5C_Intron1_2	GGTACCCTGAGTAGACCCAG
KEAP1	KEAP1_Intron2_1	TCAGTAGATCGTGTACCCTG
KEAP1	KEAP1_Intron2_3	ACTAACGCCAGAGAACCCTG
KEAP1	KEAP1_Intron2_2	TTTAGTCATCACAATGTACG
LACTB2	LACTB2_Intron5_1	GAAAGAGCCTTACACCTCAC
LACTB2	LACTB2_Intron5_3	GAGAAACTGCCTAACTATGT
LACTB2	LACTB2_Intron5_2	GGGACACAAGATAATCAAGA
LIF	LIF_Intron2_1	GGGCTTGTAAATATCATTAG
LIF	LIF_Intron2_2	TCGGTGTCTAGCCCTAGCTG
LIF	LIF_Intron2_3	GGGTCCTCATGCGCTAGATG
LIPA	LIPA_Intron2_1	TAGCTCACATAACTGGATCG
LIPA	LIPA_Intron2_2	ACACAAGCGTGAAACAAGGG
LIPA	LIPA_Intron2_3	ACTGAAGTTTAACCAGACAC
LIPH	LIPH_Intron2_3	ACAAGGGTGCTCCCTCAGAT
LIPH	LIPH_Intron2_2	ATGTGAATAAGCCCCAGGGA
LIPH	LIPH_Intron2_1	GCAAATGTGAATAAGCCCCA
LIPI	LIPI_Intron2_3	CCGTTATATGTAGTGGCCAG
LIPI	LIPI_Intron2_1	GAAATGTCGATATATGAGGG
LIPI	LIPI_Intron2_2	ACTTTGTAAGGCCCATATCG
LYG1	LYG1_Intron5_1	CGTGCCCAAATTCTTCTGTG
LYG1	LYG1_Intron5_3	GCCACCGTCAGTCTCCTGTG
LYG1	LYG1_Intron5_2	ACCTCACAGGAGACTGACGG
MCEE	MCEE_Intron2_3	GGGTGGGGAGTCATATACCG
MCEE	MCEE_Intron2_1	GTAGCCCTGTGATTACAGAG
MCEE	MCEE_Intron2_2	GGAGACCACTAAGTTCCACG
MGAT4C	MGAT4C_Intron4_2	AAAGTAGGGACCTTAACTAG
MGAT4C	MGAT4C_Intron4_1	GGATGCAAGATGTTTTACAG
MGAT4C	MGAT4C_Intron4_3	TCTCCACAGTCTATGCACAA
MIS18A	MIS18A_Intron4_2	GTTATGAGAATTATCGTTTG
MIS18A	MIS18A_Intron4_3	TATGAGAATTATCGTTTGTG
MIS18A	MIS18A_Intron4_1	ATGAGAATTATCGTTTGTGG
MOCS2	MOCS2_Intron1_2	GGCCGGCGTCTTGGGTTCGG
MOCS2	MOCS2_Intron1_1	AGGGCGGGAGAGACACGTCG
MOCS2	MOCS2_Intron1_3	GCTGACAAGAGTTCTCGGAG
MOGAT3	MOGAT3_Intron3_1	GTGGATGATGTTCAAGAGCG
MOGAT3	MOGAT3_Intron3_2	GAGTGGATGATGTTCAAGAG
MOGAT3	MOGAT3_Intron3_3	CTTGAACCGGGACCAAGAGG
MOGS	MOGS_Intron2_1	GTAACCAGGTACACCCAAGC
MOGS	MOGS_Intron2_2	GGTAACCAGGTACACCCAAG
MOGS	MOGS_Intron2_3	TTGAGAATCAGCCTTAGTGA
MPC2	MPC2_Intron3_1	CATTAGAGAATCATCCGAAG
MPC2	MPC2_Intron3_2	TTTGCCATGAAATCATCTAG
MPC2	MPC2_Intron3_3	AATGAAATTTCATGTCCATG
MSR1	MSR1_Intron4_1	TCTTCGTACTGTACTTACAG
MSR1	MSR1_Intron4_2	GTCAATGATCATCACCACTG
MSR1	MSR1_Intron4_3	TTTAATGTCATAATCCTCAG
MSRB1	MSRB1_Intron2_1	AGGTCAACCTCTTATGTCGG
MSRB1	MSRB1_Intron2_3	GCTCTCCCGATAGCCTGGGG
MSRB1	MSRB1_Intron2_2	TGGCCTTCTGGTGCAAATGT
MTHFS	MTHFS_Intron1_1	GTGCTCGAAAACCCTCCGTG
MTHFS	MTHFS_Intron1_2	GGTCTGCTAACCAACAAACA
MTHFS	MTHFS_Intron1_3	GTTGTGGAAACATAGCCTTG
NANP	NANP_Intron1_2	CACACCGACAGTCTGACCGG
NANP	NANP_Intron1_1	TCTGCAGCGAGAGATACTGG
NANP	NANP_Intron1_3	CTGTAACTGAGACATGCACG
NAT9	NAT9_Intron6_2	TGGTAATACTGTAACTTAGC
NAT9	NAT9_Intron6_1	GTTACAGTATTACCACCACC
NAT9	NAT9_Intron6_3	GAGTGGGGCTTAGACCTGGG
NDUFA7	NDUFA7_Intron1_1	ACACTCGGGGAAACGGATGT
NDUFA7	NDUFA7_Intron1_3	ACGGAGCCCGAAGCCCCCCA
NDUFA7	NDUFA7_Intron1_2	AGGAGCGGGTCCCGGACACA
NDUFAF4	NDUFAF4_Intron2_2	CACAACCATGAACTGCCCGA
NDUFAF4	NDUFAF4_Intron2_1	GGCAGGAAGATTCTAGTTAG
NDUFAF4	NDUFAF4_Intron2_3	AAAACCGATGGAAAACTGTG
NDUFB11	NDUFB11_Intron1_2	GCTACCAAGATCACACGGGT
NDUFB11	NDUFB11_Intron1_1	TTAGGCAGTAGAGGACTGCG
NDUFB11	NDUFB11_Intron1_3	TATCCAAGCCCCTTAACCAG
NDUFC1	NDUFC1_Intron4_1	GTCGTGAGACTACACCAGCG
NDUFC1	NDUFC1_Intron4_2	ATACACATACAGTTTCGTGA
NDUFC1	NDUFC1_Intron4_3	AAATTTAGGATGTCACATTG
NMRK1	NMRK1_Intron3_3	GGTGTTACTTATCCACTAGA
NMRK1	NMRK1_Intron3_1	TGGATGTAATTCAATTAACG
NMRK1	NMRK1_Intron3_2	ATGTAATTCAATTAACGTGG
NUDT12	NUDT12_Intron6_2	TGACCAAACCAATACAGTCA
NUDT12	NUDT12_Intron6_1	AATTAGTAATTCCATACAGG
NUDT12	NUDT12_Intron6_3	GTAATCCATGCATAATGAGA
NUDT14	NUDT14_Intron1_3	CCTCCCGCCGATCTCCCGGG
NUDT14	NUDT14_Intron1_2	CGTGGGGTACCACTCCCGGG
NUDT14	NUDT14_Intron1_1	CCATCGCCTCGGAGCCACGG
NUDT18	NUDT18_Intron1_1	GATGTAATGACAACTAGACG
NUDT18	NUDT18_Intron1_2	TGGAGGCGAGAGATACACAG
NUDT18	NUDT18_Intron1_3	TTGAGAGTGTCCACCCAGAG
NUDT5	NUDT5_Intron2_1	GATCTCCTATCATGACACGT
NUDT5	NUDT5_Intron2_2	CGGCACTATACTGAACTGAG
NUDT5	NUDT5_Intron2_3	GTCTAGGCAGAACGAACCTG
NUDT6	NUDT6_Intron3_1	GCTAGCAATTTCTAACAGTG
NUDT6	NUDT6_Intron3_3	AATCCCCCACTCCTACTCAG
NUDT6	NUDT6_Intron3_2	GGTGATGAAACACTTGACTG
NUDT8	NUDT8_Intron2_3	CCCTAATCCACCAAACTGAG
NUDT8	NUDT8_Intron2_1	ACAGGTCTAGTGCATTTGAG
NUDT8	NUDT8_Intron2_2	AAGGCCTATGCATGGCAAAG
PARP1	PARP1_Intron1_1	ACTGACTTAGGTATGCCCCG
PARP1	PARP1_Intron1_2	GGCATACCTAAGTCAGTACG
PARP1	PARP1_Intron1_3	AATGACCAGATATCCCTCAG
PAX5	PAX5_Intron6_3	GCTAACTCTAGGAACTACGG
PAX5	PAX5_Intron6_1	GAAGGAGTAGAACATCTCCG
PAX5	PAX5_Intron6_2	TCTCACCACTAGTACCAGCG
PDSS2	PDSS2_Intron3_3	ATTAGACCTACAAAGCTGAG
PDSS2	PDSS2_Intron3_2	ATACTCATGAGGTAGACCTG
PDSS2	PDSS2_Intron3_1	ATTCTGAGACCCTTACACAG
PGAM2	PGAM2_Intron1_1	GCTTTCCCTCCCAAGCCAGT
PGAM2	PGAM2_Intron1_2	GGAGTCGGGTGGGGGCCCAC
PGAM2	PGAM2_Intron1_3	TGCAGAGTGGGGAGTCGGGT
PHF19	PHF19_Intron2_3	AGGGTGTACTCCTAGTCACC
PHF19	PHF19_Intron2_1	CAGGTTTGAGAGGATCACAG
PHF19	PHF19_Intron2_2	ACATACGGAGACAAAAATGG
PHOSPHO1	PHOSPHO1_Intron2_3	TTGGCCCTCGATGAGAGTAG
PHOSPHO1	PHOSPHO1_Intron2_2	CTGAGAGGAGGTCATTCTAG
PHOSPHO1	PHOSPHO1_Intron2_1	GCAGTGGGGTTTATGCCCAG
PIK3C2B	PIK3C2B_Intron1_1	GGGACAGTCTGATAAGCGTG
PIK3C2B	PIK3C2B_Intron1_3	ATGGAGATAAGGCCGGCATG
PIK3C2B	PIK3C2B_Intron1_2	GGTGGTAGGATTCTCAGACA
PLA2G12A	PLA2G12A_Intron2_1	GGCTAAGTGGGATAGCTGTG
PLA2G12A	PLA2G12A_Intron2_3	GTCCATTAAAGATTCTCCAG
PLA2G12A	PLA2G12A_Intron2_2	CATAGCTGAGAGAGTAACAT
PLA2G12B	PLA2G12B_Intron2_1	TAAGGTCCTTAGTCTAAACG
PLA2G12B	PLA2G12B_Intron2_3	AAAGTTCTGATCCACTACCA
PLA2G12B	PLA2G12B_Intron2_2	TCCTGATCACAAGAGGACTG
PLPP5	PLPP5_Intron2_2	CTACAAAGGCCGTCTCGGGG
PLPP5	PLPP5_Intron2_1	TTAAACACTCGAGCCCTAGG
PLPP5	PLPP5_Intron2_3	AGTGAACAGCAGCGCCCGTG
PRDM4	PRDM4_Intron7_3	TGAATGTCCATTAAGGGCAG
PRDM4	PRDM4_Intron7_2	TTGGAATGCTAGGCCCAAGT
PRDM4	PRDM4_Intron7_1	TAAAGCACTACATTACACTT
PRKAA1	PRKAA1_Intron3_1	GAGCAATCATATAAGCCGCG
PRKAA1	PRKAA1_Intron3_3	AGTAAAAACAGGCTCCACGA
PRKAA1	PRKAA1_Intron3_2	GCTACAGCTCTCCCACAAAG
PSPH	PSPH_Intron7_1	AAGGTGGTGCCCATCCTACG
PSPH	PSPH_Intron7_3	AACTTATTGAGCACACACCT
PSPH	PSPH_Intron7_2	ACTACACCAAAAATATAGTG
PTGES	PTGES_Intron1_1	CCAAGTGATAGGATGCCCGG
PTGES	PTGES_Intron1_2	GATCCTGTGGTTAATCAGCG
PTGES	PTGES_Intron1_3	TGAAACGTATCACAGATCCA
PTGES2	PTGES2_Intron7_2	GTCAGTTATGTGAACCAAGG
PTGES2	PTGES2_Intron7_3	CCAGTGAGACGCCCTCCCAG
PTGES2	PTGES2_Intron7_1	TTTGAACAAAGCATGTGGGG
PUS3	PUS3_Intron2_1	AAGCAATACTAGGATATTCT
PUS3	PUS3_Intron2_2	TTCTCAAAGCAAGCAATACT
PYGO2	PYGO2_Intron2_1	GGTGTTACGTTATCATCAGG
PYGO2	PYGO2_Intron2_3	GTAGACAGTGTGCCGCCAAG
PYGO2	PYGO2_Intron2_2	GACCAAAGTTCTTACCACGC
RDH14	RDH14_Intron1_1	GCCATGGATCTACTTCGGGG
RDH14	RDH14_Intron1_2	GATGGTGCTGAGTTTACTGG
RDH14	RDH14_Intron1_3	TCAAAACTACTAGCTCCAGG
RFK	RFK_Intron2_1	CTGTATAACTAGCTTCCGCG
RFK	RFK_Intron2_2	TTATTGATACAGTCCCACAT
RFK	RFK_Intron2_3	TTCATAGCCCCAAAGTCATG
RNLS	RNLS_Intron6_2	GTTGCACACTAACTTGACTG
RNLS	RNLS_Intron6_1	GGGATACAAACTCCACAAGG
RNLS	RNLS_Intron6_3	GGAAGGGATTAACTGCAGTG
SCD5	SCD5_Intron2_1	CTGACCCCGTATCAACAATG
SCD5	SCD5_Intron2_3	GGACAGTGTACAGAGGACGG
SCD5	SCD5_Intron2_2	CTTGAGTGTGAAATCCACTG
SDR39U1	SDR39U1_Intron2_2	CAGAGTTGGGCGGCGCAGGG
SDR39U1	SDR39U1_Intron2_1	GGGCAGAGTTGGGCGGCGCA
SDR39U1	SDR39U1_Intron2_3	AGGGCAGAGTTGGGCGGCGC
SRXN1	SRXN1_Intron1_3	ACTACCCGGAGATAAGCCGT
SRXN1	SRXN1_Intron1_2	CTAGGACTGAAAGTTATCGG
SRXN1	SRXN1_Intron1_1	AGGTTTGGGACACATTTACG
ST8SIA1	ST8SIA1_Intron2_1	TACCCCTATCACCATCACTG
ST8SIA1	ST8SIA1_Intron2_2	GGTTCCCGCAGAGATCTGTG
ST8SIA1	ST8SIA1_Intron2_3	TTGCAGTGTCATGAACAGTG
ST8SIA5	ST8SIA5_Intron4_1	GCGAACTACATACAGCCCGT
ST8SIA5	ST8SIA5_Intron4_2	GAATCAGGCTAAATTTAAGG
ST8SIA5	ST8SIA5_Intron4_3	CGTCTGCAGCTCACTCACTG
ST8SIA6	ST8SIA6_Intron5_1	CGGACTGCTCAGAACCACAT
ST8SIA6	ST8SIA6_Intron5_3	TTAATGCAAACCCACACTTG
ST8SIA6	ST8SIA6_Intron5_2	AAGGGCAGAGTAAAGCAACG
SUPT7L	SUPT7L_Intron4_3	CTGTTGAGAGTCGAGCATTG
SUPT7L	SUPT7L_Intron4_1	TTTGGCCAGGAACATCGCTA
SUPT7L	SUPT7L_Intron4_2	ACACCATTGATTATTCACCT
TAF5L	TAF5L_Intron4_1	GACAATCATCAAGATCCCTG
TAF5L	TAF5L_Intron4_2	TCTTATATGAGCAATTATGG
TAF5L	TAF5L_Intron4_3	CCATTACAGAGTAATGACTG
TBL1XR1	TBL1XR1_Intron3_1	CAACATTTTAAACTAGACCG
TBL1XR1	TBL1XR1_Intron3_3	AATTCATATAAGAAGTCCGG
TBL1XR1	TBL1XR1_Intron3_2	AACCCAACACAGATACACTG
TCN1	TCN1_Intron5_2	ATCAGTTCTCCTAAACCAGG
TCN1	TCN1_Intron5_1	GTAGTTTGCTCTTATCAGCG
TCN1	TCN1_Intron5_3	ATTTTAGCAAAGTTCCTCAG
THEM4	THEM4_Intron1_1	CTAAACGAAGCTATGCAATG
THEM4	THEM4_Intron1_2	GATGTGGGGAGTTACTGACT
THEM4	THEM4_Intron1_3	TGCACCATAAAACCAAAACG
THEM5	THEM5_Intron1_1	TTATGCCCCGTCACCCATAG
THEM5	THEM5_Intron1_3	ACACATTTGGGCCCCCACAG
THEM5	THEM5_Intron1_2	AGTAGTCTGAGTCCCACAGG
TPMT	TPMT_Intron4_2	GAGGTGGGCAACTAGGAACG
TPMT	TPMT_Intron4_1	TACTACTTAAATCACCCATG
TPMT	TPMT_Intron4_3	CAACCAATTATCAGGCAGGG
TRMT5	TRMT5_Intron3_3	GTCCATCGATAGGTTGACAA
TRMT5	TRMT5_Intron3_2	GATAGGTTGTGTATACACAC
TRMT5	TRMT5_Intron3_1	CTTATGTCACCAGATAGACA
TRUB2	TRUB2_Intron4_3	TGGATCGTCGAGTAGCTGGG
TRUB2	TRUB2_Intron4_1	GAAGCTTAGAGGATTCCGTG
TRUB2	TRUB2_Intron4_2	ATACCACAAAGTATGTACGC
TXNDC12	TXNDC12_Intron4_3	GCCAGGGATAATCCTAACAC
TXNDC12	TXNDC12_Intron4_1	ACTAGCATGTTATTTCAACG
TXNDC12	TXNDC12_Intron4_2	CCCTACATGATCTATCACCT
TXNDC9	TXNDC9_Intron2_2	AGTCGGCACTTAATAGACCT
TXNDC9	TXNDC9_Intron2_1	GATGTTTGAAGGGCCCACGT
TXNDC9	TXNDC9_Intron2_3	TTTTGATTTTCTGATCCACG
UBE2N	UBE2N_Intron1_2	TTTCACGAGATCCCCCACAG
UBE2N	UBE2N_Intron1_1	ACTTCGCAGAGATAAACGAG
UBE2N	UBE2N_Intron1_3	CCATAGACAAGGGACCAGTG
UCK1	UCK1_Intron1_1	CTAACCCCGTTGGGCCCCCG
UCK1	UCK1_Intron1_3	CTTCCGAGCATACCCCCCAG
UCK1	UCK1_Intron1_2	ACGGGCGGCCCGGTCCAGAG
UCP1	UCP1_Intron1_2	AGCACCTGACTAGTAAACTC
UCP1	UCP1_Intron1_1	GATTAGCTGAAGAACCACCA
UCP1	UCP1_Intron1_3	GCTCACGCGCAGATGGAGGG
UCP2	UCP2_Intron3_1	TGGAGCATCGAGATGACTGG
UCP2	UCP2_Intron3_2	CATCTCGATGCTCCAAACAC
UCP2	UCP2_Intron3_3	TCCAAACACTGGCCCTTGAG
UCP3	UCP3_Intron2_1	CATGTGGGCACACGTCATGG
UCP3	UCP3_Intron2_2	GATTTCTACTGTGACCAGCA
UCP3	UCP3_Intron2_3	ACAAAGCAGTATTATACACA
UGT2A1	UGT2A1_Intron4_1	ATGACTAGCCAAATAACTAG
UGT2A1	UGT2A1_Intron4_2	TGTAGGAGACCTCTATCACA
UGT2A1	UGT2A1_Intron4_3	CCAGATCATAGAAATTACGA
UGT3A1	UGT3A1_Intron4_2	TTCACGGGTGCAGACCACAG
UGT3A1	UGT3A1_Intron4_1	GTGGCCTCTGCACTACACAG
UGT3A1	UGT3A1_Intron4_3	GCATCATGGAGGGATTACGT
UGT3A2	UGT3A2_Intron4_2	GCTCGATACTAGCTGCACTG
UGT3A2	UGT3A2_Intron4_1	GCTTGGTCTAACCAGCACTG
UGT3A2	UGT3A2_Intron4_3	TGGATTCGGAGTAAGCAGGG
UQCRB	UQCRB_Intron3_1	TTCACACGTAAGACTCAATG
UQCRB	UQCRB_Intron3_2	TTGCTTTGATAGGTTATGAG
UQCRB	UQCRB_Intron3_3	ACAGTGTTGCTCATTAAGGA
USP49	USP49_Intron4_1	CTTATTAGCCCAATAACCCG
USP49	USP49_Intron4_2	TTGACTTCAGACCTTCCATG
USP49	USP49_Intron4_3	AAGCAAGTAAAACTGTACAC
WT1	WT1_Intron6_1	GGAGCCGAGACTAATAACAC
WT1	WT1_Intron6_2	GAAATACGGAAATCTGACGA
WT1	WT1_Intron6_3	CCACATGTGAACATTCACGT
AADAC	AADAC_Intron1_2	GCCTAGGGTTAACCACGAGA
AADAC	AADAC_Intron1_1	TCTGTGCTACAATATGTGAG
AADAC	AADAC_Intron4_1	GGGATATACCAATACCAGGG
AADAC	AADAC_Intron4_2	GTTGACTTTAGTTACAAACG
AANAT	AANAT_Intron4_2	GAGGCCAGATACATACTCTG
AANAT	AANAT_Intron4_1	GGATTAGAGATGGACCCCTG
AANAT	AANAT_Intron6_2	GGGGTATGGCTCCCAATTTG
AANAT	AANAT_Intron6_1	CGTGTCAGCAGAAGTGACCT
ABHD1	ABHD1_Intron1_1	AGAGCCGACTCTCCATTCGG
ABHD1	ABHD1_Intron1_2	GGTCCTACTAAGCTATTTGG
ABHD1	ABHD1_Intron4_1	TTTAGAGATCCTTGGCCCTG
ABHD1	ABHD1_Intron4_2	CAAGGATCTCTAAAGGGAGT
ABHD1	ABHD1_Intron7_1	AAGACTCATTTGGGGGAACC
ABHD1	ABHD1_Intron7_2	GATAGTGGAAGACTCATTTG
ABHD10	ABHD10_Intron3_1	AAACAAACAGCTTAAATACG
ABHD10	ABHD10_Intron3_2	CTAAAGAAACAGCTTAGGCC
ABHD10	ABHD10_Intron4_1	GCTAGCCCTAACAATGTCAA
ABHD10	ABHD10_Intron4_2	AAGCGGTAAATATATTGAGG
ABHD12B	ABHD12B_Intron5_2	TGAGGTTATTAAGTTCACGA
ABHD12B	ABHD12B_Intron5_1	CCTCTCAAAAAACAACCACG
ABHD12B	ABHD12B_Intron9_2	TAATGAGAGTAGATTGACCG
ABHD12B	ABHD12B_Intron9_1	CATGTACAAGAATTTCACCG
ABHD12B	ABHD12B_Intron11_1	CTACAGTAGAGACGACATGG
ABHD12B	ABHD12B_Intron11_2	GTACAGAAACAGCTAACTTG
ABHD14A	ABHD14A_Intron1_1	GTGAGATTTAGATAATACCG
ABHD14A	ABHD14A_Intron1_2	TTCCGCGGGACTCTGCCCCG
ABHD14A	ABHD14A_Intron4_1	AAGTCTTACTTGGAGGGACA
ABHD14A	ABHD14A_Intron4_2	CCATCCAACTCTTCCATCCA
ACAT2	ACAT2_Intron3_2	TTCCTACTGATGCAGCTCAG
ACAT2	ACAT2_Intron3_1	ATATTCGGTTCCAATCACAC
ACAT2	ACAT2_Intron7_1	TCTACGAAATGAAGAAGGCG
ACAT2	ACAT2_Intron7_2	TTGGATCACATGCTTTCTAG
ACAT2	ACAT2_Intron8_1	TACTTGGCATAAAAGGAACG
ACAT2	ACAT2_Intron8_2	TCTTCTAGGTGTTGGCCATG
ACBD4	ACBD4_Intron4_1	ATGTGTAGGAAACGTAGTGG
ACBD4	ACBD4_Intron4_2	GGTTGGGGGTAACATGAAGG
ACBD4	ACBD4_Intron7_2	GCACAGTGGGGTGGGAAAAG
ACBD4	ACBD4_Intron7_1	GAGTGGGAGCACAGTGGGGT
ACBD4	ACBD4_Intron9_2	TGAGTGTTTCGCACCCAGCG
ACBD4	ACBD4_Intron9_1	GTATCGAGGAACCACCCATG
ACE	ACE_Intron2_1	AGGGCCTTTACGACACTTGG
ACE	ACE_Intron2_2	GATATGTGTTGCTTGACCGC
ACE	ACE_Intron3_2	GTTCTGAGGTGCACATCGCA
ACE	ACE_Intron3_1	TGCCATGACTTGATACAACG
ACE	ACE_Intron7_2	ACAGACTGCGTGCTGCCGTG
ACE	ACE_Intron7_1	TGCTGCCGTGGGGATCCCGG
ACP1	ACP1_Intron2_1	AGGCCAACCTGAACTCCTCT
ACP1	ACP1_Intron2_2	CAACCTGAACTCCTCTGGGC
ACP1	ACP1_Intron3_1	CAATCAGTAGAAATACTGAG
ACP1	ACP1_Intron3_2	TTTCAGTGGGTCATTGACAG
ACP1	ACP1_Intron5_1	TGGCAGGATACAAATGTGTT
ACP1	ACP1_Intron5_2	ATGGCAGGATACAAATGTGT
ACSF3	ACSF3_Intron3_2	CGTCAGCCCACGACTCCGTG
ACSF3	ACSF3_Intron3_1	TCCTCCGTGAGATTGGACAG
ACSF3	ACSF3_Intron4_1	AAGTCAGACACAGTCAACGG
ACSF3	ACSF3_Intron4_2	GCAGTCGCCCCTATCCACAG
ACSF3	ACSF3_Intron7_1	TGCGTACAAGAGTCTCACTG
ACSF3	ACSF3_Intron7_2	TAGGTGTGGGGAGATTCACG
ADIPOR2	ADIPOR2_Intron2_2	ACTAACTAGAGGCTATGATG
ADIPOR2	ADIPOR2_Intron2_1	AAGGCTGTTGAAATCAAGGG
ADIPOR2	ADIPOR2_Intron3_1	CAGTACATGACTATCCCCAG
ADIPOR2	ADIPOR2_Intron3_2	GGTTGACAGACTTCCTACAG
ADIPOR2	ADIPOR2_Intron7_1	GGCCACTTGTCCAAGCCATG
ADIPOR2	ADIPOR2_Intron7_2	AACTGGATTGAACTGGATTG
ADSSL1	ADSSL1_Intron1_1	GCATGAATGATGGCGCCTAG
ADSSL1	ADSSL1_Intron1_2	GAAAGACGCAGTCTTCCCTG
ADSSL1	ADSSL1_Intron7_1	GTGCTCGTTGAACACCCTTG
ADSSL1	ADSSL1_Intron7_2	GGCCTGCGTCCCAAGAAGGT
ADSSL1	ADSSL1_Intron9_2	CTGGATGTAAGGACTGTCGG
ADSSL1	ADSSL1_Intron9_1	TCACAACCAAGCTAGAATTG
AFMID	AFMID_Intron1_1	ACCATGGTGCTCAAGCACTG
AFMID	AFMID_Intron1_2	GCCCTATGGCTGACACACAG
AFMID	AFMID_Intron9_1	ATGGAGGGTCTTGTCCACTT
AFMID	AFMID_Intron9_2	CGTGTTAAATAAATGATGGA
AFMID	AFMID_Intron10_1	AGACGACGACGACCAGCCTG
AFMID	AFMID_Intron10_2	TCCTGGTTTGCACATCTAAG
AGPAT3	AGPAT3_Intron4_1	GCTCAAAGAGACGCCCCAGG
AGPAT3	AGPAT3_Intron4_2	AAATTCTTCTGCCAGCATCG
AGPAT3	AGPAT3_Intron5_2	AAACAGCACCCCATGTGCAG
AGPAT3	AGPAT3_Intron5_1	TCTGACCAGGCCATCCTAAG
AGPAT3	AGPAT3_Intron8_2	CTTGGGCTGAGTAAGCCGTG
AGPAT3	AGPAT3_Intron8_1	TGTGTGTGCCAGGACACTCG
AGPAT5	AGPAT5_Intron1_1	ACGAATGGAAAAGTTAACCG
AGPAT5	AGPAT5_Intron1_2	CTTCCATCGTAATGGCACAG
AGPAT5	AGPAT5_Intron3_1	ACTGCTAAGGTCCCACTCTG
AGPAT5	AGPAT5_Intron3_2	GCTTTAGTAGACTGATTTGG
AGPAT5	AGPAT5_Intron4_1	ACAAAGCACCATGATCACCG
AGPAT5	AGPAT5_Intron4_2	GGAGTGGAGTCAGTCCACTG
ALG1	ALG1_Intron3_1	TTGAACGTAGGTCGTCAGTG
ALG1	ALG1_Intron3_2	TGCTAACATGGCTCTCACAG
ALG1	ALG1_Intron12_1	GGGGAATGGGCAGCACGTAG
ALG1	ALG1_Intron12_2	GGCAGCACGTAGAGGCCGGG
ALG10	ALG10_Intron1_1	ATCTGGGAGAATACTCAACG
ALG10	ALG10_Intron1_2	TGATCTGGGAGAATACTCAA
ALG10	ALG10_Intron2_1	GCATTGAACAACGAGTTGCA
ALG10	ALG10_Intron2_2	ACTAAGGGTTAACCTGTCCA
ALG10B	ALG10B_Intron1_2	ATCTGGGAGAATACTTAGTG
ALG10B	ALG10B_Intron1_1	AGCAGATCTGATCCCCAGGG
ALG10B	ALG10B_Intron2_1	ACCCAGGCAATCGACCTCCG
ALG10B	ALG10B_Intron2_2	GATACCGACTAAGTTCTGTG
ALKBH7	ALKBH7_Intron1_1	TACAGCGCAGTCGAGCGTGG
ALKBH7	ALKBH7_Intron1_2	AGTCCTTAGTACTCACCCTG
ALKBH7	ALKBH7_Intron2_1	GGCCTGCCTACCCCCTGGCT
ALKBH7	ALKBH7_Intron2_2	AACCGGGCCTGCCTACCCCC
ALMS1	ALMS1_Intron2_1	ACGGTTGAAAAGGAGATACG
ALMS1	ALMS1_Intron2_2	CTTGTGGGTTGAAAGAGTTG
ALMS1	ALMS1_Intron3_1	GACAGCATAAGAGACTCACG
ALMS1	ALMS1_Intron3_2	AAGTGATGCACTTTACTGTG
ALPI	ALPI_Intron3_2	GGGAGCAGTTAGGATCCCAG
ALPI	ALPI_Intron3_1	GGGATCAAGGATATGGAGTG
ALPI	ALPI_Intron5_1	CCAGGGGCTATGCATGAGGA
ALPI	ALPI_Intron5_2	GGAGCCAGGGGCTATGCATG
ALPI	ALPI_Intron6_2	CAGGGGGAGGCCAAGTGTGT
ALPI	ALPI_Intron6_1	AGCCCTGAGACCCACACACT
ALPL	ALPL_Intron4_1	CCAAACCCGAAGTATAGCTG
ALPL	ALPL_Intron4_2	AAGTACAGAGAAGTGTCCGG
ALPL	ALPL_Intron6_1	CTAGTGTTCTCTTGTCACCG
ALPL	ALPL_Intron6_2	GTGGTGACTACAGAGCCGTG
ALPL	ALPL_Intron7_2	ACGGGACCTGATACCCAATG
ALPL	ALPL_Intron7_1	AATTCTGATAGAGCCCAGGG
ALPP	ALPP_Intron3_1	AGTAAGGAGTTAGAGGCAGT
ALPP	ALPP_Intron3_2	GCTCTTCTCTGGGGCAGACA
ALPP	ALPP_Intron5_1	AGGGGGCACGGGGCCAGCCA
AMDHD1	AMDHD1_Intron3_2	TGACTAGCGTCACCAGCTGG
AMDHD1	AMDHD1_Intron3_1	AGATCTGAATAATTGCAATG
AMDHD1	AMDHD1_Intron5_2	GTGTTTGCATGAAATGCGGT
AMDHD1	AMDHD1_Intron5_1	TGCAAGAATGAATGTTGACG
AMDHD1	AMDHD1_Intron7_1	GGTAGATACTCTGCTCAGAA
AMDHD1	AMDHD1_Intron7_2	ATGCCTGCAGGCATTTATGT
AMDHD2	AMDHD2_Intron3_1	AATCTGCTCTACTTCCCCGG
AMDHD2	AMDHD2_Intron3_2	GCCAATCACAGAATCCCCTG
AMDHD2	AMDHD2_Intron6_1	GGATGGCTGAGCGACAGCAG
AMDHD2	AMDHD2_Intron6_2	GGGATGGCTGAGCGACAGCA
ANGPTL3	ANGPTL3_Intron1_1	ACACTATTGTAAATTACTGA
ANGPTL3	ANGPTL3_Intron1_2	GAAAGAAGCATACAAGGGGA
ANGPTL3	ANGPTL3_Intron2_1	CTTCTGCCCTGGTATCTACG
ANGPTL3	ANGPTL3_Intron2_2	AGTGGGCCACGTAGATACCA
ANGPTL4	ANGPTL4_Intron1_2	GCTCCCCCCTTAGGAAGCCG
ANGPTL4	ANGPTL4_Intron1_1	TTCCAAATCTCCATCCGCTG
ANGPTL4	ANGPTL4_Intron2_1	GGTGGTGAGAACTGGACGTG
ANGPTL4	ANGPTL4_Intron2_2	ACCTGGGGTCCAGCTATCAG
APOBEC3B	APOBEC3B_Intron2_1	TGAGCTGAACAGTCACATGA
APOBEC3B	APOBEC3B_Intron2_2	GTGAGCTGAACAGTCACATG
APOBEC3B	APOBEC3B_Intron5_1	CATAGATAGAAGGTTCTGGG
APOBEC3B	APOBEC3B_Intron5_2	TCCTGCGGAGAGACAGACTG
APOBEC3B	APOBEC3B_Intron7_1	CAAGGCACAGGGGAGCGGGG
APOBEC3B	APOBEC3B_Intron7_2	AGGCAAGGCACAGGGGAGCG
APOBEC3D	APOBEC3D_Intron2_2	GGGTTCACCAAACTGTGATG
APOBEC3D	APOBEC3D_Intron2_1	TTGCCAAGGAGGAATCCGGG
APOBEC3D	APOBEC3D_Intron5_1	AAAAAGGCGATAAGAACTCG
APOBEC3D	APOBEC3D_Intron5_2	ACACATAGCAGAGCCCACGC
APOBEC3F	APOBEC3F_Intron2_1	GATGCCAGAATTCACGCATG
APOBEC3F	APOBEC3F_Intron2_2	CTGCGCTGTCCCATGTGGTG
APOBEC3F	APOBEC3F_Intron5_2	CACATGACCTATGATGAGAC
APOBEC3F	APOBEC3F_Intron5_1	GCCCGGTTAACGGATGCCTG
APOBEC3G	APOBEC3G_Intron2_2	AAGTTGCTGGTGCATTGACA
APOBEC3G	APOBEC3G_Intron2_1	ACTGCTGCTCCGTGACATGG
APOBEC3G	APOBEC3G_Intron5_1	CCCACGAGTGACATAGACTG
APOBEC3G	APOBEC3G_Intron5_2	ATTAAGCTCATAGAGCCCAG
APOBEC3G	APOBEC3G_Intron7_2	AGTGGAAAGTAGGCATATGG
APOBEC3G	APOBEC3G_Intron7_1	GACAGTGACAATGATCGGAG
APOBEC3H	APOBEC3H_Intron2_1	CAAGGGTTACGAAAACACAG
APOBEC3H	APOBEC3H_Intron2_2	GGACAGATGAATTAACACAC
APOBEC3H	APOBEC3H_Intron4_1	GTTAGGAGGTACCAACTGGT
APOBEC3H	APOBEC3H_Intron4_2	AGGCCTGGAGAAAAACACGG
APOBR	APOBR_Intron1_2	ATTAGGGGTACGAGGACGCA
APOBR	APOBR_Intron1_1	GGGCATCGATTAGGGGTACG
APOBR	APOBR_Intron3_1	AACGAGTGGAATCCCGAAGC
APOBR	APOBR_Intron3_2	GAATCCCGAAGCCGGCCCCA
AQP1	AQP1_Intron1_1	GATGACTCCATTAATCATCG
AQP1	AQP1_Intron1_2	TCTGTCCCGTACATCCCCCG
AQP1	AQP1_Intron2_1	AGCCAGTGGGACTCCCGACA
AQP1	AQP1_Intron2_2	ACCCGCCATCCTCCACCCAA
AQP1	AQP1_Intron3_1	TGGGAAAAACCTGTCCAACG
AQP1	AQP1_Intron3_2	GTAAACTGAGCTCAACACAG
AQP10	AQP10_Intron1_1	TAAGGACAACAGAAGGAGCC
AQP10	AQP10_Intron1_2	AAAGAGATAAGGACAACAGA
AQP10	AQP10_Intron4_1	CCTATTGTTCAGTCTCTGGG
AQP10	AQP10_Intron4_2	AGAGACTGAACAATAGGCTG
AQP2	AQP2_Intron1_1	AGTGAGTGTTGATCTGTTGG
AQP2	AQP2_Intron1_2	GGCCCACACAGACTTGAGAG
AQP2	AQP2_Intron2_1	TTGACTCCTAGATACCCCAG
AQP2	AQP2_Intron2_2	TGACTCCTAGATACCCCAGA
AQP2	AQP2_Intron3_2	TTACTAGATTAATGTCGGGG
AQP2	AQP2_Intron3_1	TCTTTGGCATCAGATCTGAG
AQP5	AQP5_Intron1_2	TCTACTCAACCGCTCCACTG
AQP5	AQP5_Intron1_1	TTAAACCCGTCTCTCCAGTG
AQP5	AQP5_Intron2_1	AGGGCGTAGTTAAGGGTCCA
AQP5	AQP5_Intron2_2	CCATGGTTAACCAAGCAGCT
AQP5	AQP5_Intron3_2	GGTCTGCTTCTATCCCTGCG
AQP5	AQP5_Intron3_1	AACCTTCAGAGGGGACACGT
AQP6	AQP6_Intron1_1	AGTCGGAGAGCAGAGGACGT
AQP6	AQP6_Intron1_2	GGAGAAAAATGAAGTCCCCG
AQP6	AQP6_Intron2_1	ACACACCGGGTCCGTCCCCG
AQP6	AQP6_Intron2_2	CCCAGGATATGGCACTACAG
AQP6	AQP6_Intron3_2	GCTAAAACGGGGGAAGTGAG
AQP6	AQP6_Intron3_1	GGGAGATCAAGTCGGCACTG
AQP8	AQP8_Intron1_1	GTGAATTAATTCAAGGTTGG
AQP8	AQP8_Intron1_2	GAGGCAAGTCCAGATATAGA
AQP8	AQP8_Intron3_2	CGGGCGTGTTCCATAGACAG
AQP8	AQP8_Intron3_1	ACATGGTTCTGACAGCTGCG
AQP9	AQP9_Intron1_2	GCGTATGCCCTGTCTCAGAG
AQP9	AQP9_Intron1_1	CAGTGCCACAGAAACCCATG
AQP9	AQP9_Intron4_2	GCGAATATTAGAAAACCCTG
AQP9	AQP9_Intron4_1	AGGGTGGTAGTTGAGCCTAG
ARG1	ARG1_Intron1_2	GCCTTGCAAGCCTTTCAAGG
ARG1	ARG1_Intron1_1	TTATGTGAGTACATGCACGT
ARG1	ARG1_Intron4_1	GGAAAAACTAAACGTCCTGG
ARG1	ARG1_Intron4_2	TTGGTTGATAAAAGGCAGTG
ARG2	ARG2_Intron1_1	CCTCCATCGATTCTCCACTG
ARG2	ARG2_Intron1_2	CAGAATGAGCATTAACTGGG
ARG2	ARG2_Intron4_1	GTATATCCCTCCCCTCAGTG
ARG2	ARG2_Intron4_2	CTCAGGAAAATATTACCCAG
ARSK	ARSK_Intron1_1	GAGGTCGCCGATCCCCAGCG
ARSK	ARSK_Intron1_2	GGTGTACGTGTGAGTACACG
ARSK	ARSK_Intron4_1	CTGGTAACTGAAGTCTACCG
ARSK	ARSK_Intron4_2	GTCCCCTAACAAAATTACCC
ASAH2B	ASAH2B_Intron3_2	TGTCACAACTCTATGAGCCT
ASAH2B	ASAH2B_Intron3_1	GTCACAACTCTATGAGCCTG
ASPA	ASPA_Intron2_2	AACTGGGTAGTGGTCCTGGT
ASPA	ASPA_Intron2_1	TGGGGTGTCTAAATCAAATG
ASPA	ASPA_Intron5_2	GTAGCATGAGGGATTCGAGG
ASPA	ASPA_Intron5_1	TAACTTATTCTGTCACAGGG
AURKC	AURKC_Intron4_1	GGGTTCCGGAAAGGGAACCA
AURKC	AURKC_Intron4_2	CTTGCTGTGCTAGGACAACA
AURKC	AURKC_Intron6_2	TCCAGAACAGCGCCTTAACA
AURKC	AURKC_Intron6_1	TTAACAAGGCTCAAAGAAGA
B4GALNT2	B4GALNT2_Intron5_1	AGCACCATAAGATCTTGATG
B4GALNT2	B4GALNT2_Intron5_2	CTGACCTTGAATCTGGACAG
B4GALNT2	B4GALNT2_Intron8_1	ATGGACTTCCTTCAACCCTG
B4GALNT2	B4GALNT2_Intron8_2	GAATCAGCAATGGGACTCAG
B4GALNT2	B4GALNT2_Intron9_2	GTACATGCAGGCATACGGTG
B4GALNT2	B4GALNT2_Intron9_1	AATCTCATACTAGTCAACGG
B4GALT7	B4GALT7_Intron3_1	TTAAGGGCCACTAACCACCC
B4GALT7	B4GALT7_Intron3_2	CTTAACACTGAAGAGTGTAG
B4GALT7	B4GALT7_Intron4_1	ACTGGCTAGATGACCATGCA
B4GALT7	B4GALT7_Intron4_2	CTAGATGACCATGCAGGGCA
B4GALT7	B4GALT7_Intron5_1	CCACAGGACCTCTGATGGCG
B4GALT7	B4GALT7_Intron5_2	GCATAAGCCTCCTAGAGAAG
BBOX1	BBOX1_Intron3_1	ACCAAGTACTATACAAACGT
BBOX1	BBOX1_Intron3_2	CTCTCAAAACTACAAACCAG
BBOX1	BBOX1_Intron6_1	CTGGTGGTGAATAGACCGAG
BBOX1	BBOX1_Intron6_2	ATTCCAGCTCAGGATCAGTG
BHMT	BHMT_Intron1_2	ACCCGCGGTGCAGATCCAGG
BHMT	BHMT_Intron1_1	ATACTGTGCAGTAATCACCC
BHMT	BHMT_Intron3_2	AACCTAGCACTGTACACTCG
BHMT	BHMT_Intron3_1	AGTGTACAGTGCTAGGTTTG
BHMT	BHMT_Intron4_1	GCTTTCAAGAGTACTGTGTG
BHMT	BHMT_Intron4_2	TTGCTTTCAAGAGTACTGTG
BHMT2	BHMT2_Intron1_2	CAATTGTCGAGGGAAAACAT
BHMT2	BHMT2_Intron1_1	TTACCCTACACCCAACACGT
BHMT2	BHMT2_Intron3_1	AACCAATGCTCAATGCAGGT
BHMT2	BHMT2_Intron3_2	ATATAAGGTCATGGTAACAG
BHMT2	BHMT2_Intron4_2	GGGTTCTTAAACAAACAGAG
BHMT2	BHMT2_Intron4_1	TCCAGAGGGAGAATCCACAC
BMI1	BMI1_Intron7_1	GTAGTTCACAGTTAATACTT
BMI1	BMI1_Intron7_2	CTAGTATCAAACAAAATTGG
BMI1	BMI1_Intron8_1	TTATTTCTAGAGAGTGTTAA
BMI1	BMI1_Intron8_2	ATTATTTCTAGAGAGTGTTA
BRMS1L	BRMS1L_Intron4_1	TTCTGGTAGAGTAGACAACG
BRMS1L	BRMS1L_Intron4_2	TAGTCATATCTCAAGCCCTG
BRMS1L	BRMS1L_Intron7_2	ACAGATAGCAGTGAACTACA
BRMS1L	BRMS1L_Intron7_1	GGGATAACAATTTCTCCTAG
BST1	BST1_Intron2_1	TTAGTGTGAGAATCAACATG
BST1	BST1_Intron2_2	TCAGATGAAATAGTGACTGG
BST1	BST1_Intron4_2	GGGATCAAACAGTAACTCAG
BST1	BST1_Intron4_1	TGTTTATCACAGGCCCACTG
BTD	BTD_Intron3_1	ATTGGGCCCATTAACACACG
BTD	BTD_Intron3_2	ACAACCACACTTGAGAACTG
BTD	BTD_Intron4_1	GCACTCATACTGTATGACTG
BTD	BTD_Intron4_2	CACAGAGGTGATCTAAGTCA
C6orf89	C6orf89_Intron2_1	TGAGAACTATAGGGACTGCA
C6orf89	C6orf89_Intron2_2	TCAAATTTCCTAGTAACACA
C6orf89	C6orf89_Intron4_2	TAAGCAAGCAGCCAATCAGC
C6orf89	C6orf89_Intron4_1	TAAAGGCTAGGTCAAGCTCT
C6orf89	C6orf89_Intron6_1	ACAGACACGTGACTTTAACA
C6orf89	C6orf89_Intron6_2	TCTGGCAAAAACCATCCTGG
CA14	CA14_Intron4_2	GACAGACTTAGTGCCTGCCG
CA14	CA14_Intron4_1	GGGACTCAGACAAAGTAACA
CA14	CA14_Intron5_1	TACAGAATAAATGGTCAGGG
CA14	CA14_Intron5_2	ATGTACAGAATAAATGGTCA
CA14	CA14_Intron7_1	GAGGTGTTACTTTGGGGAGT
CA14	CA14_Intron7_2	AGAGGTGTTACTTTGGGGAG
CA4	CA4_Intron4_1	GCGCGCCCAGAGCCCAGACA
CA4	CA4_Intron4_2	GCGCGCACCTGCCTTGGGCA
CA4	CA4_Intron5_2	CAGTTCATTCTCCCGATCTG
CA4	CA4_Intron5_1	AGAGACCTGGGACTCCAGCG
CA4	CA4_Intron7_2	TGAATGTCGATGATTAACAA
CA4	CA4_Intron7_1	TGGAGTCAACATCATCACTG
CA6	CA6_Intron3_1	AGATCACCACTTTGTGACAG
CA6	CA6_Intron3_2	ACAGCCAAAAGACTGTGCGA
CA6	CA6_Intron4_1	CAATCCGCTAGAAAGCTGAG
CA6	CA6_Intron4_2	TTCTTTGCTACCAACCACGC
CA6	CA6_Intron6_2	AACGAACGTCAACAACTAAG
CA6	CA6_Intron6_1	TGACGTTCGTTGAGATGCTG
CA9	CA9_Intron4_2	CAAAGGAGCGGGGCGGAGCG
CA9	CA9_Intron4_1	GCGGAGCGGGGCCAGAGACG
CA9	CA9_Intron5_1	GCTCCACGATAGAGTCCGGG
CA9	CA9_Intron5_2	GAAGGCCGGAACATGAAGGG
CA9	CA9_Intron7_1	ATCCTAAAGATGGTAGGCAG
CA9	CA9_Intron7_2	AGCTCACAACCAGCACCTCA
CARNS1	CARNS1_Intron4_1	AGGAGCCGGTGAGTAAACTG
CARNS1	CARNS1_Intron4_2	ACACCACCCCAGGTACTGCA
CARNS1	CARNS1_Intron6_1	GTGTGCAATTTAAGACACGT
CARNS1	CARNS1_Intron6_2	TCTCAGTGTAGCCTAGAGCG
CARNS1	CARNS1_Intron8_2	CTGGCCCTAATCTAGCACAC
CARNS1	CARNS1_Intron8_1	GTCCACGGAGGAATCCAGTG
CAV1	CAV1_Intron1_1	CGGGATTGTGATCATCACGG
CAV1	CAV1_Intron1_2	AAAGCTGGAAGGGATTACCG
CAV1	CAV1_Intron2_1	CTAAAACCACTGAGACACGG
CAV1	CAV1_Intron2_2	AAATGATAACTACCCCACTG
CD38	CD38_Intron2_1	CTGGACTGAGTGTGGCAACG
CD38	CD38_Intron2_2	CAGACATTATAGTGTGAGTG
CD38	CD38_Intron4_2	GATTTGTCACACTACCTATG
CD38	CD38_Intron4_1	AAGGTGCTGGTAGCTCACAA
CDK1	CDK1_Intron4_1	GACAAAACACAATCCCCTGT
CDK1	CDK1_Intron4_2	TATCCTAACGAAAATATAGG
CDK1	CDK1_Intron6_2	ACGTCTAGCATAAACTAAGA
CDK1	CDK1_Intron6_1	ACAATTGACATATCTTGGAG
CDK9	CDK9_Intron2_1	ATTAGCCACTAAACGCTCGG
CDK9	CDK9_Intron2_2	GTTGTACTAGAGCTAAGATG
CDK9	CDK9_Intron4_1	TCCCGGGTGGATGTCACTAA
CDK9	CDK9_Intron4_2	TCCTTTAGTGACATCCACCC
CDK9	CDK9_Intron6_1	AAAATACCTGCTCCACTCGG
CDK9	CDK9_Intron6_2	TGGTATGTGCCAATCCATAG
CEL	CEL_Intron1_2	GGATCGGAGTCAAAGCTGGG
CEL	CEL_Intron1_1	GAGACACAGATGCCTCGCAG
CEL	CEL_Intron5_1	GAGCTTCCTCTCAACCTGTG
CEL	CEL_Intron5_2	AGAGGAAGCTCAAACGGGAA
CEL	CEL_Intron6_1	CAGGATAAAGAACGGAAATG
CEL	CEL_Intron6_2	ATGGGGTCCAGGATAAAGAA
CHEK1	CHEK1_Intron3_1	CACTCTAATTTTAAGTAAAA
CHEK1	CHEK1_Intron3_2	TCACTCTAATTTTAAGTAAA
CHEK1	CHEK1_Intron9_1	AGGGCACATGTAGAGCTTAG
CHEK1	CHEK1_Intron9_2	CCAACCCAATCTATCAACAG
CHEK1	CHEK1_Intron10_2	TATGTGGCTCTAAAGAGGGT
CHEK1	CHEK1_Intron10_1	CCTAAGTCATTACATTCCAT
CHPF2	CHPF2_Intron2_1	ACACTGAGTATGGTTAAGGG
CHPF2	CHPF2_Intron2_2	AGTCCCTGATAAGCTAGTGG
CHPF2	CHPF2_Intron3_2	TCAGTGGACAGGCACTATTG
CHPF2	CHPF2_Intron3_1	TCAATAGTGCCTGTCCACTG
CIDEA	CIDEA_Intron2_2	TGAGTCATAGACACAAGTCA
CIDEA	CIDEA_Intron2_1	AAAAGCAGCATCTCACTGGG
CIDEA	CIDEA_Intron3_1	ACTGTGTCCAATTAGCCACG
CIDEA	CIDEA_Intron3_2	ATAGCTGATGTGTATCCACA
CMAS	CMAS_Intron4_2	GCAACTAACAGGCAACACAG
CMAS	CMAS_Intron4_1	GGTGAAAAGAGTTACAACCT
CMAS	CMAS_Intron6_1	AATGGTACACCTATTATCTA
CMAS	CMAS_Intron6_2	AGCTATCTAATGTTTCCCAA
COQ10A	COQ10A_Intron3_2	ACATAAAGTACTTACAAGGA
COQ10A	COQ10A_Intron3_1	TGAGGGAAATACTTGACACA
COQ10A	COQ10A_Intron4_1	CCCAAGTTAGGGCTCTTACG
COQ10A	COQ10A_Intron4_2	TGGCCAGGGACTATCCAACA
COQ10B	COQ10B_Intron3_1	CATCAAGTATAGTATTACGT
COQ10B	COQ10B_Intron3_2	ACATCAAGTATAGTATTACG
COQ10B	COQ10B_Intron4_1	TACTTTAAGATTGAACCACG
COQ10B	COQ10B_Intron4_2	GTATCTAAGGTAGAATTGTG
COQ7	COQ7_Intron2_2	GAGAGGTATTGTATCCCAAG
COQ7	COQ7_Intron2_1	TCTGCCCATTCAGTAGACCA
COQ7	COQ7_Intron4_1	TATTATGGCCTAAGACAGGG
COQ7	COQ7_Intron4_2	AACATGTTAGAGATTGTTAG
COQ7	COQ7_Intron5_1	TCGGTTGTAAGATTCAGGGC
COQ7	COQ7_Intron5_2	ATGAAGCTCCTGGGAGACCA
COX10	COX10_Intron2_2	ACTTGTGGCATATTTCGACC
COX10	COX10_Intron2_1	CAGTGGTAAGGCATAATCCA
COX10	COX10_Intron4_1	ACTCCACCTCTACTACACCG
COX10	COX10_Intron4_2	GTGGGATGAGTGACACATGG
COX20	COX20_Intron1_1	GTGGGTAAGGACGTTCTCCG
COX20	COX20_Intron1_2	TAGAGATTAAAGCTCCGTTG
COX20	COX20_Intron2_1	AGGATTCTGAGCATAATCGG
COX20	COX20_Intron2_2	TAAGTGTGGTGAAAAACGCG
CTCF	CTCF_Intron5_2	TGGTGTGTAACACTTATGAG
CTCF	CTCF_Intron5_1	GTGTGTAACACTTATGAGTG
CTCF	CTCF_Intron8_1	TATCATCTCAACAAGCCGTG
CTCF	CTCF_Intron8_2	GAGGGGAAGAATCTCATGCG
CTCF	CTCF_Intron9_1	GCTACAGCTAGCTAAGGGTG
CTCF	CTCF_Intron9_2	TGTGAACCCTTCCACTGATG
CYB5B	CYB5B_Intron1_1	ATATTACATCAACAACCCAG
CYB5B	CYB5B_Intron1_2	TGTGTGCTGGATGATTTACA
CYB5B	CYB5B_Intron2_2	TATGGATCCTCAAATCTCCC
CYB5B	CYB5B_Intron2_1	ATGGATCCTCAAATCTCCCA
CYB5B	CYB5B_Intron3_1	ATGACGCATTACGACAGACA
CYB5B	CYB5B_Intron3_2	GTGATGTTAGCTATTGCCAG
CYB5D1	CYB5D1_Intron2_2	GGTAGAGGAAATGGAGAGCG
CYB5D1	CYB5D1_Intron2_1	AGGGTGTCAGAGCAGCCATT
CYB5D1	CYB5D1_Intron3_1	AGCCACTTCTAACTACCGGA
CYB5D1	CYB5D1_Intron3_2	AAGCTGCTATCTGCCAAGGG
CYC1	CYC1_Intron1_1	GAGAGCGAATCACGGTCTAG
CYC1	CYC1_Intron1_2	GTGACCTTCACGGAGATGCG
CYC1	CYC1_Intron3_2	AACCCTGCCATCTCAACAGT
CYC1	CYC1_Intron3_1	CAACCCTGCCATCTCAACAG
CYC1	CYC1_Intron6_2	GGTGGGTATCAGAGAAGGGC
CYC1	CYC1_Intron6_1	GTGGGTATCAGAGAAGGGCT
CYP4V2	CYP4V2_Intron2_1	TATTAACACTAGGCCAACAG
CYP4V2	CYP4V2_Intron2_2	ACAGGACTGAAAATGAACGA
CYP4V2	CYP4V2_Intron6_2	GTAGGGTGTACTTCACCACA
CYP4V2	CYP4V2_Intron6_1	AGGCTCCATAGTCCTACACC
CYP4V2	CYP4V2_Intron7_2	ACTCGTGTACATAAGCACAA
CYP4V2	CYP4V2_Intron7_1	AAGGCAAACGTAAAGCACCG
D2HGDH	D2HGDH_Intron5_2	GTGCTGGTACTGTGAGTCGG
D2HGDH	D2HGDH_Intron5_1	AGCCGTGAGAGGACACCCCG
D2HGDH	D2HGDH_Intron8_1	CCTCTGAGTAGTGACCACGG
D2HGDH	D2HGDH_Intron8_2	GAAGCTGAGAGAATCCCCGG
DBH	DBH_Intron1_1	GAAAGCTCCATGGATCTACG
DBH	DBH_Intron1_2	GTGTAGCTGAGTGACCACAC
DBH	DBH_Intron2_1	CACTATGCCACTAGTCCCGG
DBH	DBH_Intron2_2	GATGATCCAGACAATTTCAG
DCK	DCK_Intron2_1	CCCTAGCGGAGTAGTAACGT
DCK	DCK_Intron2_2	GAGAGCTTGATTACACTGGG
DCK	DCK_Intron4_1	CTTGGCTTAGAGCCACCAAG
DCK	DCK_Intron4_2	AAATGACATGCATAAGACCA
DCK	DCK_Intron6_2	GGTAGTTACTTATACAGCTG
DCK	DCK_Intron6_1	TAATCACTCAGTTATCAACA
DERA	DERA_Intron2_2	ATACCTAAGGGCCTCAACAG
DERA	DERA_Intron2_1	TGATTCTCTACTAACCACCT
DERA	DERA_Intron7_2	GACGTTGTGTAATTGAGGCA
DERA	DERA_Intron7_1	AGTGGTGGTAGTTTCAACTG
DERA	DERA_Intron8_1	GCCATCAGAAGTGAGTAGGG
DERA	DERA_Intron8_2	TGCTGAAGCACATACTAGTG
DGUOK	DGUOK_Intron2_2	AAAAGGGTACGTGTACCACA
DGUOK	DGUOK_Intron2_1	GATGAAGGGACGATTACTGA
DGUOK	DGUOK_Intron4_1	ATTGCCGTACTACAGACGGG
DGUOK	DGUOK_Intron4_2	TCGAAACTCAGTATTTACGA
DGUOK	DGUOK_Intron6_1	CATATGCAGCCAAGCCCATG
DGUOK	DGUOK_Intron6_2	CAGGGTCATATAGCATCAAG
DHDH	DHDH_Intron1_1	TAAGGTCTTCCTTTCCCACG
DHDH	DHDH_Intron1_2	GATAGGAGAAAACCTACCTG
DHDH	DHDH_Intron3_1	AAGAGTGTCAGGGCTCACGG
DHDH	DHDH_Intron3_2	ACAAGGCTAAGGGGTCCTGG
DHDH	DHDH_Intron5_1	AATTTCGGAAGTGCATCCGG
DHDH	DHDH_Intron5_2	TCCTCCTTAACCAAGCCAAG
DHRS4L2	DHRS4L2_Intron2_2	GTCGACAAAGCCCAAGATTG
DHRS4L2	DHRS4L2_Intron2_1	GACTTACACAGAGCCAACCC
DHRS4L2	DHRS4L2_Intron3_1	TTTGTGCTGAATGTGTCCCG
DHRS4L2	DHRS4L2_Intron3_2	GCCTCAATGACACAGCGAGG
DMRTC2	DMRTC2_Intron4_2	TACATAGCAAACCAGGGCTG
DMRTC2	DMRTC2_Intron4_1	ACTAGATTACATAGCAAACC
DMRTC2	DMRTC2_Intron7_1	CTGAGGAACACTTAGAGGGT
DMRTC2	DMRTC2_Intron7_2	GCTGAGGAACACTTAGAGGG
DNASE1	DNASE1_Intron2_1	AATGCCACGAGCATCAGCTG
DNASE1	DNASE1_Intron2_2	GGAGCCACAGCTGATGCTCG
DNASE1	DNASE1_Intron6_1	AGCGGCCTCCGCATGTCCCA
DNASE1	DNASE1_Intron6_2	TGTGGCCCTGGGACATGCGG
DNASE1	DNASE1_Intron8_1	GCCACATGAGGATGGGACAC
DNASE1	DNASE1_Intron8_2	TCCTGTGTCCCATCCTCATG
DPF2	DPF2_Intron4_1	GTGGGACCACGTCACAGAGG
DPF2	DPF2_Intron4_2	TGGGTGGGACCACGTCACAG
DPF2	DPF2_Intron5_2	TCTTGGGACAGGGTGGCCTA
DPF2	DPF2_Intron5_1	CCAAAAGAGTCTAACTCCTC
DPF2	DPF2_Intron10_1	TGTACCTAGAATAAAACCCG
DPF2	DPF2_Intron10_2	AGGACACTGCTATTTCCAAG
DPPA3	DPPA3_Intron2_1	AATTAAGACTCCCTAGCTCT
DPPA3	DPPA3_Intron2_2	AGACTCCCTAGCTCTAGGCC
DPPA3	DPPA3_Intron3_1	TCTGGATGATAATCCTGTCA
DPPA3	DPPA3_Intron3_2	CAGTAGAGGCGGCATGTGTG
DTX3L	DTX3L_Intron2_1	TACAGCACGCTACATCCCAG
DTX3L	DTX3L_Intron2_2	AATCAGAGACAACTTGACTG
DTX3L	DTX3L_Intron3_1	CCACTATGCTACGATTACCA
DTX3L	DTX3L_Intron3_2	CCTATAGTAAAAATTAGACA
DYDC2	DYDC2_Intron3_1	TAAACGGGGCCCCCTCACTG
DYDC2	DYDC2_Intron3_2	CCAGGGAAGCCTTATAAACG
DYDC2	DYDC2_Intron4_1	CTAATATTATAACATCACAG
DYDC2	DYDC2_Intron4_2	GGACAAGGATGAACTCCACG
ECHDC3	ECHDC3_Intron3_2	AATTGGGAGCATCTTCATGG
ECHDC3	ECHDC3_Intron3_1	AGCTTCACACAAGCACAGTG
ECHDC3	ECHDC3_Intron4_1	TAATCGGCAAACCTACCCAG
ECHDC3	ECHDC3_Intron4_2	GGCCCCGTTTACGAACCAGG
EEF1AKNMT	EEF1AKNMT_Intron1_2	ACCTTCCGGAGCACGTACGA
EEF1AKNMT	EEF1AKNMT_Intron1_1	CCAAAGGCATGAGTAGAGTG
EEF1AKNMT	EEF1AKNMT_Intron3_1	GTGTATATATCCCCATACCA
EEF1AKNMT	EEF1AKNMT_Intron3_2	CCACAAATGAAGCTCCTCAG
EGLN2	EGLN2_Intron2_1	GATTACACTGATGATGCACG
EGLN2	EGLN2_Intron2_2	CAGCTTAACATCCACCACAG
EGLN2	EGLN2_Intron3_2	CTCCTCTCTAGCGGACTGTG
EGLN2	EGLN2_Intron3_1	TGCCCCGGGAGCCCACTAGG
ENO2	ENO2_Intron4_2	TAGGGGACCTGAACTCCCAT
ENO2	ENO2_Intron4_1	TCAGGTCCCCTAATCCAGGT
ENO2	ENO2_Intron6_2	GACTTAGTCCGGAAAGCTGG
ENO2	ENO2_Intron6_1	ATCTTGGGTTAACACTCCTG
ENO2	ENO2_Intron10_1	GACACCCTCAAACACCTGGA
ENO2	ENO2_Intron10_2	ACTGCCCTCTCACCCCTGAA
ENO3	ENO3_Intron4_1	AAGGGAAAATGTTTCGGGAG
ENO3	ENO3_Intron4_2	CAGAAGTCAGGGCACATGCA
ENO3	ENO3_Intron6_2	AGGCTGGAGTTATCGAGCCT
ENO3	ENO3_Intron6_1	AGGAACTGGGTTATATGGCA
ENO3	ENO3_Intron10_1	TTGAGGTTAATGCTCCCTTG
ENO3	ENO3_Intron10_2	CAAGGGAGCATTAACCTCAA
ENOPH1	ENOPH1_Intron1_1	CAATAATGTGGTATGCATGG
ENOPH1	ENOPH1_Intron1_2	TCTAGCAGAAGACACACTTG
ENOPH1	ENOPH1_Intron2_1	ACTACTGGGATCAACAAACC
ENOPH1	ENOPH1_Intron2_2	GGTCTGCAGAGCTAACTCAC
ENOPH1	ENOPH1_Intron4_1	AGCATTATTATAGGAGAACC
ENOPH1	ENOPH1_Intron4_2	GTATTTCAGAGAAAGGCATG
ENPP7	ENPP7_Intron2_1	ACTGACATCGCAGAGCACGG
ENPP7	ENPP7_Intron2_2	GTGGGTTACAGTATTGACCC
ENPP7	ENPP7_Intron3_2	CACACCCTACCGCATAGTGA
ENPP7	ENPP7_Intron3_1	GGGACACTTCCTTCACTATG
ENTPD7	ENTPD7_Intron8_1	TATGACATTGCTAATACACG
ENTPD7	ENTPD7_Intron8_2	GTATTTAACAGGTAAAACGA
ENTPD7	ENTPD7_Intron10_2	TTGGAGATGATATCACCCAG
ENTPD7	ENTPD7_Intron10_1	GGGATGACGGGAATAAACAG
EPHX4	EPHX4_Intron1_2	CTGTAGAGAATTGTTCCTCG
EPHX4	EPHX4_Intron1_1	GAGGGAGCGTGACCGCCGCG
EPHX4	EPHX4_Intron5_2	TTTCCTAACGCATCCCATCA
EPHX4	EPHX4_Intron5_1	AGCAGAAGTAGAAGACTTCG
EPN1	EPN1_Intron2_1	TGTCCCCACAGAATACGACA
EPN1	EPN1_Intron2_2	GGGGTGTAGCAGCTTCACAG
EPN1	EPN1_Intron4_1	CAACGCAGGAGATACCACCG
EPN1	EPN1_Intron4_2	TGCGGACAATGTATGAAATG
EPN1	EPN1_Intron5_1	CCCGACGAGCTTGTCCTGGG
EPN1	EPN1_Intron5_2	TCAGGACAGACTAGTAACCA
EPN2	EPN2_Intron5_2	TTTTCCGGAAGCATACACAG
EPN2	EPN2_Intron5_1	GCTCAGGTACCACCAAACTG
EPN2	EPN2_Intron6_2	GATGATCCCTGATGACACAT
EPN2	EPN2_Intron6_1	ATGATCCCTGATGACACATG
EPN3	EPN3_Intron3_1	GGCAAAGATGATGATATCGG
EPN3	EPN3_Intron3_2	CACTCACCCACTCCACCATG
EPN3	EPN3_Intron4_2	GCAGCTCAGGCGGGAATCCG
EPN3	EPN3_Intron4_1	CCTCCTCCCGCTGTACCCGG
EPN3	EPN3_Intron5_1	AATCCAGAACCCGAATCCGG
EPN3	EPN3_Intron5_2	AAAATATGTCCATGAGCCCG
EPX	EPX_Intron5_1	AGGTGATGGATAATACACGT
EPX	EPX_Intron5_2	CAAGGTATTAGAGCCAACCC
EPX	EPX_Intron6_1	TAAGGACACTCAGACTGACG
EPX	EPX_Intron6_2	GAATAGATAAGGTTGCAACA
EPX	EPX_Intron8_2	GTATGGGTGAGTAGCCTCTG
EPX	EPX_Intron8_1	GGGAGTTAGAGGCAGAATCG
ETNK1	ETNK1_Intron1_1	AGTGACGGACCCATCCACGG
ETNK1	ETNK1_Intron1_2	AAGTGACGGACCCATCCACG
ETNK1	ETNK1_Intron6_1	CCTCCATTATATGCACACTG
ETNK1	ETNK1_Intron6_2	TCTCTACAGATAGACCCTAG
EXOG	EXOG_Intron3_1	GCAGTTAGTATAGATCAGTG
EXOG	EXOG_Intron3_2	TCAGTGAGGAAATTACAGTG
EXOG	EXOG_Intron5_2	AGTGGACCTACTCAGCACCA
EXOG	EXOG_Intron5_1	AGGCTCTATAGATAACACAG
EXTL3	EXTL3_Intron3_1	GCTATGTTGATTTAGCAGAG
EXTL3	EXTL3_Intron3_2	GGTAGGACTACCAAACAGAG
EXTL3	EXTL3_Intron5_2	GTCCTACAAGGCCCACAGAG
EXTL3	EXTL3_Intron5_1	TTGACAGCTGTTGATCAGAG
EXTL3	EXTL3_Intron6_1	AGGAGTGACATCCTACGCAG
EXTL3	EXTL3_Intron6_2	ATGAGTCCCTAAGCCCATGG
FAAH2	FAAH2_Intron1_1	CCAACCTTGGATACCAACTG
FAAH2	FAAH2_Intron1_2	CCTTTGTTAGGAGACAAGGG
FAAH2	FAAH2_Intron7_1	AGCGCTCTAAAGATGCACAG
FAAH2	FAAH2_Intron7_2	TAGCAATTCTAACACCACTG
FAAH2	FAAH2_Intron8_1	TAGCTGACTAACATGGCCCG
FAAH2	FAAH2_Intron8_2	GTGAAGAACCCAGTACCAGG
FAHD2A	FAHD2A_Intron3_1	AAGTATTCGCCCTGACACCA
FAHD2A	FAHD2A_Intron3_2	TCCCTGGATGAGATGCTATG
FAHD2A	FAHD2A_Intron4_1	TGACCCCACTCACCAACACA
FAHD2A	FAHD2A_Intron4_2	GCTTAGAGATCCCTTGCCAT
FAHD2A	FAHD2A_Intron7_1	GCCTGTACTTCTCAAGTCTG
FARS2	FARS2_Intron2_1	TCACTACAAGAGTAACAGCG
FARS2	FARS2_Intron2_2	CTACCCTTAGGACTAAGACG
FARS2	FARS2_Intron5_2	AGCTAGTGGACATACCACGT
FARS2	FARS2_Intron5_1	AAGTACTTATGGACCCACGG
FLAD1	FLAD1_Intron1_2	GAGGACATAACAGATGACAC
FLAD1	FLAD1_Intron1_1	CCGGAGACATCAGAGCACTG
FLAD1	FLAD1_Intron5_1	GGGGCCTCATCATCCAAGGG
FLAD1	FLAD1_Intron5_2	AGGCATTGCACTTCCTACTG
FMO1	FMO1_Intron1_2	CCCCAGCAAATGTTACAGGG
FMO1	FMO1_Intron1_1	AGGTGACTAACAGTACTGTG
FMO1	FMO1_Intron2_1	CCCACTTCAAGTAAATCTGG
FMO1	FMO1_Intron2_2	TTACCCCCATATGATATGCA
FMO1	FMO1_Intron4_1	GTCCATGCTACCTCACACTG
FMO1	FMO1_Intron4_2	GAAATCTTACCACTAGCATG
FMO2	FMO2_Intron2_1	GTTTGCACTAGAATACAAGG
FMO2	FMO2_Intron2_2	AAGACAATCGCATTACCCAG
FMO2	FMO2_Intron3_2	GCATCATTGAGAATTACTCC
FMO2	FMO2_Intron3_1	CTATTCTAGACTGAGAAGGG
FMO2	FMO2_Intron5_1	TCCTAAATAGGGGTACCCAG
FMO2	FMO2_Intron5_2	GTACATGTCTGATACTGAGG
FMO3	FMO3_Intron2_2	TCGACATTCCCATTTAACCG
FMO3	FMO3_Intron2_1	GTGAGGGAAATACATCATCG
FMO3	FMO3_Intron3_2	TTCACTGCCATATCTCCAAG
FMO3	FMO3_Intron3_1	TATGCACAAGAAATCATGCA
FMO3	FMO3_Intron5_1	GCTTCCCCAAGTAACAGGTG
FMO3	FMO3_Intron5_2	AAGACTTAAGCAATACAGAG
FMO4	FMO4_Intron3_2	AGTGGAATATTTAGCCTCGG
FMO4	FMO4_Intron3_1	ACTCCCTTACTTGATCACCA
FMO4	FMO4_Intron4_1	TTTGTCCATGAAGCCCATTG
FMO4	FMO4_Intron4_2	CTTATGCAAACTCACAAAGG
FMO4	FMO4_Intron6_1	CTGTTGTTAAAAGACCAGAC
FMO4	FMO4_Intron6_2	AGTTCAGAAAGAACCGTGAG
FN3K	FN3K_Intron1_1	CTTGACAGAAGCTACCACGT
FN3K	FN3K_Intron1_2	AGGTCCTTGTGACTCCCACG
FN3K	FN3K_Intron4_1	GCTGTGTTAGATCCGTACAG
FN3K	FN3K_Intron4_2	ACCAATGAATGGTTGCCCAG
FN3K	FN3K_Intron5_1	GGTCTAGAATCCCCACACAG
FN3K	FN3K_Intron5_2	CCCATGGGAGAGGAACACGA
FN3KRP	FN3KRP_Intron1_1	GTTTCACAACGTACTGACCG
FN3KRP	FN3KRP_Intron1_2	GTACTGACCGAGGCTCACGG
FN3KRP	FN3KRP_Intron4_1	ACAGGTGCTTACCACCCAGG
FN3KRP	FN3KRP_Intron4_2	GATCTTTATGGGCAGCAACG
FN3KRP	FN3KRP_Intron5_2	ATTGATCAACGCGTGCATGA
FN3KRP	FN3KRP_Intron5_1	ACGCGTTGATCAATTTGCTG
FNTA	FNTA_Intron5_1	TTTGTGATAGGGGGACTGTG
FNTA	FNTA_Intron5_2	AAGGGGGTACAGCTATAAAG
FNTA	FNTA_Intron8_1	GACACACTATTAAGAGTCAC
FNTA	FNTA_Intron8_2	AACGATGTTGAAAGGGGACA
FOLR1	FOLR1_Intron2_1	GGACTTGTAGTGTAATAGTG
FOLR1	FOLR1_Intron2_2	GGGAGACCTCAGGTCCAATG
FOLR1	FOLR1_Intron3_2	GAAAGCTCAGCTGCTCCGCT
FOLR1	FOLR1_Intron3_1	CTATTCGGGGCTGAGTTGCT
FOLR2	FOLR2_Intron2_1	CAACATGGTATCCACCTCCG
FOLR2	FOLR2_Intron2_2	GGGGGCTTGTTCTAACAGGG
FOLR2	FOLR2_Intron3_1	TCGCCTTGAAGTGACTGAGG
FOLR2	FOLR2_Intron3_2	ATCGCCTTGAAGTGACTGAG
FOLR3	FOLR3_Intron1_2	GTGGCGTGGACACAATCTGT
FOLR3	FOLR3_Intron1_1	AGGAGCTATAGCCTGCACGT
FOS	FOS_Intron1_1	CGGAACCTGCTCGCTCACGT
FOS	FOS_Intron1_2	ACGCTCCAGTAGATGAGTAG
FOS	FOS_Intron2_2	TGCAGGAGCCAGTTCTACTG
FOS	FOS_Intron2_1	GAGCCCAGTCTGAAAGCATG
FOS	FOS_Intron3_1	AAGTTGGAGATTGAGCATAA
FOS	FOS_Intron3_2	ATAAGACACAGTCTTACTCA
GALM	GALM_Intron2_2	GTGCTCAATAGTCAATGACC
GALM	GALM_Intron2_1	TTAACCCATAGACTCCCATG
GALM	GALM_Intron3_1	AAAAGGCTTTCAAACCACTG
GALM	GALM_Intron3_2	CAGAGGGATAAACCCCAGTG
GALM	GALM_Intron6_2	ATGGAAGCTCTCCTTAAGTG
GALM	GALM_Intron6_1	ATGGTTAATGTTGCAGCCTG
GALNTL5	GALNTL5_Intron7_1	AGGTATTAGTTACAGCCATG
GALNTL5	GALNTL5_Intron7_2	GGGCCAAGGGTAACCCACTG
GALNTL5	GALNTL5_Intron8_1	ATGAGGACCAGGGACTAACG
GALNTL5	GALNTL5_Intron8_2	CATTGCTTGGGAAATCAGCG
GAPDH	GAPDH_Intron3_2	GGCTCCTCCCACACCAGCTT
GAPDH	GAPDH_Intron3_1	GGAGGAGCCACCTGGCTGAT
GAPDH	GAPDH_Intron5_2	AAGCTGACTCAGCCCTGCAA
GAPDH	GAPDH_Intron5_1	ACCCGGGTCCTGCCTTTGCA
GAPDH	GAPDH_Intron7_1	CGGGGCTGCGTGCAACCCTG
GAPDH	GAPDH_Intron7_2	CAGTCTTGGATGAGAAAGGT
GATA3	GATA3_Intron4_1	CTGTTTGGGTCACTAGCAGG
GATA3	GATA3_Intron4_2	AGTGTGTGGCACATACACAT
GATA3	GATA3_Intron5_1	AAGTGAATCGCTCACCATGG
GATA3	GATA3_Intron5_2	AGACAGCCTTAACCACCTAG
GCAT	GCAT_Intron2_1	TCATGTGGGACAAGTTCGAG
GCAT	GCAT_Intron2_2	AAACCAAAGTCTGCCCAGGG
GCAT	GCAT_Intron3_2	GATAAGCTACATCAGCTGGA
GCAT	GCAT_Intron3_1	AGCCCGGCACTGAGACACGG
GCAT	GCAT_Intron4_1	CAAGCAGCACAAGAGACGGG
GCAT	GCAT_Intron4_2	ATTAGCAAGCACCTTCTGTG
GGT1	GGT1_Intron11_1	TTGATGCTTGGGCAGTTTTG
GGT1	GGT1_Intron11_2	TGCAGTGTGGATGTTTCTGT
GLB1L3	GLB1L3_Intron6_1	ACAGGCACATGTATGCAACG
GLB1L3	GLB1L3_Intron6_2	CTGTAACGCACTAGGGAAGG
GLB1L3	GLB1L3_Intron7_1	AATGTTGGCCTGTGAACACG
GLB1L3	GLB1L3_Intron7_2	CGAGTATAAGTGGATCCGCA
GLB1L3	GLB1L3_Intron9_1	TAAATCCCATCCTCACAGCG
GLB1L3	GLB1L3_Intron9_2	AGGACAGATGTACTCCCTGG
GLOD5	GLOD5_Intron1_2	GTGGATACAAAAGATCCACA
GLOD5	GLOD5_Intron1_1	GCTCTCATGAATCCACACAT
GLOD5	GLOD5_Intron2_1	GTGGGCCAATGGTGATAACG
GLOD5	GLOD5_Intron2_2	GCTATGCTATATCAAAATGG
GLOD5	GLOD5_Intron3_1	CCCTGGCCCTGACATTACAA
GLOD5	GLOD5_Intron3_2	GTAGTTAGGTACTGTGCCCA
GLT1D1	GLT1D1_Intron4_1	AGAGACGTATTTCCTCCGGG
GLT1D1	GLT1D1_Intron4_2	CACACTGTATCCCTACACCG
GLT1D1	GLT1D1_Intron6_1	GTTGCAAAATTGTCCCGCTG
GLT1D1	GLT1D1_Intron6_2	AGGATGTAAATCCAACCCTG
GLT1D1	GLT1D1_Intron7_2	GGGTTGCGCCTTGTACGCCG
GLT1D1	GLT1D1_Intron7_1	GTAGACGTGAGAAATCCATG
GLYATL1	GLYATL1_Intron1_1	ACGAGGCACCCCCGGAGCCT
GLYATL1	GLYATL1_Intron1_2	AAATCACAGCAGATTCACCG
GLYATL1	GLYATL1_Intron3_2	GAATGCATATCCATTCAGAC
GLYATL1	GLYATL1_Intron3_1	TGAGCAGTATGGTCCTGGAG
GLYATL1	GLYATL1_Intron4_1	GGACACTGATTACAACCAAG
GLYATL1	GLYATL1_Intron4_2	GTCCCACAGTAGGTTACCTG
GM2A	GM2A_Intron1_1	TGGGTAAGTTAACCCCCTAG
GM2A	GM2A_Intron1_2	CATCAGCAAGTGATCCACTG
GM2A	GM2A_Intron2_1	AAGTGGCCCAAATTTCATGG
GM2A	GM2A_Intron2_2	CCCTGAGTGAGAACACACAG
GM2A	GM2A_Intron3_1	TGGCCGTCTCTCATCTTGTG
GM2A	GM2A_Intron3_2	TGATTCCTGATAGGTCACAC
GNPTG	GNPTG_Intron6_1	GAGACTGGGGCCCCTCTTCC
GNPTG	GNPTG_Intron6_2	TAGGTGGGTTGGGGAGACTG
GNPTG	GNPTG_Intron8_1	CTCCCAGCCAGGCCCACCAG
GNPTG	GNPTG_Intron8_2	GCTCCCAGCCAGGCCCACCA
GNPTG	GNPTG_Intron9_1	GCAGTAGCCCTCCAGCACCT
GNPTG	GNPTG_Intron9_2	GGGAAAGCCCAGGTGCTGGA
GPX3	GPX3_Intron1_1	ATGGAACTACGAGACGACGA
GPX3	GPX3_Intron1_2	CTCATGTCAAGGGATAGTGG
GPX3	GPX3_Intron4_2	ACCCAGAGTGAACATACTAA
GPX3	GPX3_Intron4_1	GTCTTCTAACTCCCAAACTG
GRXCR1	GRXCR1_Intron1_1	ACATTAGATGACATCCAACG
GRXCR1	GRXCR1_Intron1_2	GCTACATGAGAGTTATGAGG
GRXCR1	GRXCR1_Intron2_2	ACACAGCTAATTGTACACCG
GRXCR1	GRXCR1_Intron2_1	CCAATGAGACACATACACCG
GRXCR1	GRXCR1_Intron3_1	ACCACCTATAGATTCACCTG
GRXCR1	GRXCR1_Intron3_2	TAGAGTTGGTTGTACCAATG
GSTO2	GSTO2_Intron4_1	GAGGCACTAGGTTTTCTCTG
GSTO2	GSTO2_Intron4_2	TTTATAACTCCAGCCTAACA
GSTO2	GSTO2_Intron5_1	CATGTTAGCACGCACCACGG
GSTO2	GSTO2_Intron5_2	AGTGAAAGCTACCTACACCG
GSTP1	GSTP1_Intron3_1	ATCCTAGTCACAGCCCCCTA
GSTP1	GSTP1_Intron3_2	TAGGGGGCTGTGACTAGGAT
GSTP1	GSTP1_Intron5_2	AGCCAAGTAACGGGTCATGG
GSTP1	GSTP1_Intron5_1	GAGAGTAGGATGATACATGG
GTF3C4	GTF3C4_Intron1_1	ACTTAAACGTGTATGCACAT
GTF3C4	GTF3C4_Intron1_2	AGATGAAGTCTGGACAACTG
GTF3C4	GTF3C4_Intron2_1	AGTAATACCGAGCTACACAA
GTF3C4	GTF3C4_Intron2_2	GTGTCTAAAAATGTTCGGGG
GUK1	GUK1_Intron6_1	GCTGGGGGCCAGGGCATGCC
GUK1	GUK1_Intron8_1	TGAGACACCGAGGTCCACGG
GUK1	GUK1_Intron8_2	ACTGTCCCATCTAACCTCAG
GYG1	GYG1_Intron3_2	TCTTTTGTGTTGGATGACAT
GYG1	GYG1_Intron3_1	ACTGTCATGAAATATGTCAG
GYG1	GYG1_Intron6_2	TATACTTGGCTTGACCTCAG
GYG1	GYG1_Intron6_1	CCCCCATATTGTGAACAGAG
GYG2	GYG2_Intron4_1	CTTACTGGTAGATTCCTGTG
GYG2	GYG2_Intron4_2	GGGTCTAGCACAGTGCTCGG
GYG2	GYG2_Intron7_1	CCACCATTTAGCACACCGAG
GYG2	GYG2_Intron7_2	CTCCACCATTTAGCACACCG
GYG2	GYG2_Intron8_2	TAATAGACACCACCTAACTG
GYG2	GYG2_Intron8_1	TCTCTGCATGATATGCAAGG
H1FOO	H1FOO_Intron2_2	CCATGTCCTCCGTTTCAAAG
H1FOO	H1FOO_Intron2_1	TTACAGCAGGACAATCACCA
H1FOO	H1FOO_Intron4_2	TCCCTGGATGACCCTTCCGG
H1FOO	H1FOO_Intron4_1	GCCCCCGGAAGGGTCATCCA
HAGHL	HAGHL_Intron2_2	GCGGCGGATCCCGATATGGA
HAGHL	HAGHL_Intron2_1	GGTAACACAGACGGTCCCGG
HAGHL	HAGHL_Intron4_1	TGTGAGGGCGGGTGGACCCG
HAGHL	HAGHL_Intron4_2	CCGGGTCCACCCGCCCTCAC
HAGHL	HAGHL_Intron6_1	CCGCACCCTCACTGTGCTAG
HAGHL	HAGHL_Intron6_2	TCTGCACCCCTAGCACAGTG
HAO2	HAO2_Intron4_2	GACAAACTGACTCTCCAAAG
HAO2	HAO2_Intron4_1	TGAACTAGGTGACTACAAAG
HAO2	HAO2_Intron5_1	AGGCCCCTTATGGATCAAGG
HAO2	HAO2_Intron5_2	GATAGGACTAAAGTACAACA
HAO2	HAO2_Intron6_1	CTAGAATTTATACTAGTGGA
HAO2	HAO2_Intron6_2	GAGCTATAATGGGAAAGATG
HAS3	HAS3_Intron2_2	GGACGCAAAAAATTGCTCTG
HAS3	HAS3_Intron2_1	CCCCACAGAATTAACCACAG
HAS3	HAS3_Intron3_1	CCCCCACTAAGTACCTCCGG
HAS3	HAS3_Intron3_2	CTGACTCGTAGGTCATCCAG
HDAC1	HDAC1_Intron2_1	CCCATATGCCAATACCACAG
HDAC1	HDAC1_Intron2_2	TCTCCAGAGAGGTTAAAACT
HDAC1	HDAC1_Intron6_2	TGAGGCACAAGATCGCCTGG
HDAC1	HDAC1_Intron6_1	AGTGTGATGCAACCCAGCTG
HDAC1	HDAC1_Intron7_2	TTAGTAAGGAGAGATTCCTG
HDAC1	HDAC1_Intron7_1	AACCTCAAGAAAGCAATACG
HEMK1	HEMK1_Intron2_2	ATTATCCACATAAGACACCT
HEMK1	HEMK1_Intron2_1	AGTGTTCTGGGATAGACACC
HEMK1	HEMK1_Intron4_1	CCTAACAAATGATTGCCTGT
HEMK1	HEMK1_Intron4_2	GGGATGGTTTCTGATGAAAG
HEMK1	HEMK1_Intron5_1	TCTAGCCAGATAGATGTGGT
HEMK1	HEMK1_Intron5_2	TTAGAGTCTGTGAACCACAG
HEPH	HEPH_Intron9_2	ACTGTGTCGTTACAGATCAA
HEPH	HEPH_Intron9_1	GCAAGGTTTAGGGGCCACCG
HEPH	HEPH_Intron15_1	GTTTAGCCTAGATAAAGCAT
HEPH	HEPH_Intron15_2	TATGGTCTAGTTGAGCAAGA
HEPH	HEPH_Intron17_1	CACCGAAGCTAAATCAACAG
HEPH	HEPH_Intron17_2	AAGGGAAAGCTAGGGCCTAG
HEPHL1	HEPHL1_Intron9_1	GTACCATTAAACGGACACAG
HEPHL1	HEPHL1_Intron9_2	TTCCTAACTCCTCATCAACG
HEPHL1	HEPHL1_Intron15_1	GGGTCCAGTAGTAAATCAAG
HEPHL1	HEPHL1_Intron15_2	ATGACCCTACACTAGAATGG
HEPHL1	HEPHL1_Intron17_1	ATTAACAGCATATTCCAGGG
HEPHL1	HEPHL1_Intron17_2	AATGTAGGTAGGAACCACAA
HMGA2	HMGA2_Intron1_1	ATTAGTGAGTTAGAACTGGG
HMGA2	HMGA2_Intron1_2	AATGCTAGTATAATGCAGAG
HMGA2	HMGA2_Intron2_1	TGACTGACAATCGAGTGCCT
HMGA2	HMGA2_Intron2_2	CTGTGTGGCGTCAATCTGGG
HMGA2	HMGA2_Intron3_1	TTTACCGGGAGATATCGATG
HMGA2	HMGA2_Intron3_2	AACATACTGAGACATCGCCG
HMOX1	HMOX1_Intron2_2	GTGTGAAGAGGATTGTAGCG
HMOX1	HMOX1_Intron2_1	GTGAAGAGGATTGTAGCGAG
HMOX1	HMOX1_Intron3_1	TATAGGTCATGGTTAACACA
HMOX1	HMOX1_Intron3_2	CCATTCAGCACACCTCACCA
HNF4A	HNF4A_Intron4_1	GAATCGAACCTGGCGCCCTG
HNF4A	HNF4A_Intron4_2	AGGGATCCCCCACACTACAG
HNF4A	HNF4A_Intron5_2	GAATACTGAAATGTCCCTAG
HNF4A	HNF4A_Intron5_1	CCCATGGATAGAAACCTGTG
HOGA1	HOGA1_Intron1_1	TGTGGATTCTCTCTGTCGTG
HOGA1	HOGA1_Intron1_2	AAAGTGCTAGGACCCAGAAA
HOGA1	HOGA1_Intron3_2	GTCTGTGTCCTCATTGGAGC
HOGA1	HOGA1_Intron3_1	CCCTGGGTCCTGCTCCAATG
HS2ST1	HS2ST1_Intron2_2	TATACTGTAGTGAAAGACGT
HS2ST1	HS2ST1_Intron2_1	GGAGTACTCAGCAATCCCAG
HS2ST1	HS2ST1_Intron4_1	TAGTAATCTGAACTGCTCCG
HS2ST1	HS2ST1_Intron4_2	CCTGACTATAATAAGGCCTG
HTATIP2	HTATIP2_Intron2_1	AAACTGATAAGGTTAGATGG
HTATIP2	HTATIP2_Intron2_2	TGGACCCCCAGGATTCTGCG
HTATIP2	HTATIP2_Intron3_1	TTACGACGTCTCCAGCACTG
HTATIP2	HTATIP2_Intron3_2	TTAAGTGAGAGAGACAGCGT
HTATIP2	HTATIP2_Intron4_1	GGGAGTTCATACACACATGG
HTATIP2	HTATIP2_Intron4_2	AAGGCCTGTGAACTACCACA
HTR3A	HTR3A_Intron2_2	ATGCCTAACAAGCTGCATAG
HTR3A	HTR3A_Intron2_1	GTGTATGAAGAACCACATGT
HTR3A	HTR3A_Intron3_1	TAAAGTGGCTGAACACACGG
HTR3A	HTR3A_Intron3_2	ACAAGACAGCCACTCCAACG
HTR3A	HTR3A_Intron6_1	ACATCCAGGTAGACTTAAGG
HTR3A	HTR3A_Intron6_2	ACAAGGAATCTGAGCTTGTG
HTR3B	HTR3B_Intron2_1	TATAAAGGGATAGCACCTGG
HTR3B	HTR3B_Intron2_2	ACAGACTTGGCTCAGCCCGG
HTR3B	HTR3B_Intron3_1	TCATTTAAGATGTATGGCCC
HTR3B	HTR3B_Intron3_2	TCCTAACAGGTAGAACCAAG
HTR3B	HTR3B_Intron6_1	CCATTACCTACACTGCACGG
HTR3B	HTR3B_Intron6_2	GGTGGGGTCTACCATCAAGG
HTR3C	HTR3C_Intron2_1	GGTGCCTATTGTTCACCACG
HTR3C	HTR3C_Intron2_2	ATGGCTTCTAATAAGGAACG
HTR3C	HTR3C_Intron3_1	TGCAGGCCAATATATTGGTG
HTR3C	HTR3C_Intron3_2	GTAGAACTGGACTCACCATG
HTR3C	HTR3C_Intron6_1	AATTGTGCTCGCCTACATAG
HTR3C	HTR3C_Intron6_2	TAAGTCATTCTGAGCAGTAG
HTR3E	HTR3E_Intron1_2	TGACCAGGTTCTAATCTCAG
HTR3E	HTR3E_Intron1_1	GAAGCTTAAAAATATCGATG
HTR3E	HTR3E_Intron2_1	AAATCGACCATAATGGTGAG
HTR3E	HTR3E_Intron2_2	GTAGTCAAAGCATAACCCAG
HTR3E	HTR3E_Intron5_2	GTAAGTAGTTATGGGGTCAG
HTR3E	HTR3E_Intron5_1	GGCAAGGGTAAAAGTGCGGG
HYAL4	HYAL4_Intron3_1	TAGAGGGTAGGGCTACTCAG
HYAL4	HYAL4_Intron3_2	CTAAGACACTAAGTCCAGGG
HYAL4	HYAL4_Intron4_1	CATACCTGAATGGTAGCTGA
HYAL4	HYAL4_Intron4_2	ATTGTGATTAATGTGGATTG
IDNK	IDNK_Intron2_1	ATCACTATTTGTAATCACCA
IDNK	IDNK_Intron2_2	CAGTGGGGTTCAAAGCCATG
IDNK	IDNK_Intron3_1	GTGTGTTGACAATATCAAGG
IDNK	IDNK_Intron3_2	TCTGGTGTGAGACACTCTAG
IL6	IL6_Intron2_1	ACAATGAAAAGGCCCTCTAG
IL6	IL6_Intron2_2	CTAGTCCTTCCAAAGCCCGG
IL6	IL6_Intron3_1	AGGGAAAAGATGTCGAACTG
IL6	IL6_Intron3_2	CAGTGCAGGTTATCTCACTG
IL6	IL6_Intron4_2	TTGAAAGACCACTGATCCGG
IL6	IL6_Intron4_1	GGGGTGAATGAGATTAACTG
IMPA2	IMPA2_Intron1_2	GATCGTGTCCAAAGACATGG
IMPA2	IMPA2_Intron1_1	ACACACATCAGGAATCACCG
IMPA2	IMPA2_Intron4_1	CGGTAGAGGAAAGATCACAG
IMPA2	IMPA2_Intron4_2	GCAGTGTCACAAATAGACCA
ING5	ING5_Intron3_1	AATGTACAAAAGTATCCACC
ING5	ING5_Intron3_2	CGGAAATGGGCATAGCCAAG
ING5	ING5_Intron6_2	CCACACAAGACCCCGCCCCA
ING5	ING5_Intron6_1	AACATGAGGCGTGTTGACTG
INSIG1	INSIG1_Intron3_1	TCATAATACAGACATGATGG
INSIG1	INSIG1_Intron3_2	ATCATGTCTGTATTATGACA
INSIG1	INSIG1_Intron5_2	GGTTAGGCTTAGAACCTCAG
INSIG1	INSIG1_Intron5_1	GTATGCCAGTTACTACCCTG
INSIG2	INSIG2_Intron3_1	GTTCAGAAACAAGAGTACCA
INSIG2	INSIG2_Intron3_2	TGTGGTTTAGACAATGAAGG
INSIG2	INSIG2_Intron5_2	GTCACTCAATTCTCCTAACC
INSIG2	INSIG2_Intron5_1	ACTTAAGGATAGGGCTGTTG
IRF4	IRF4_Intron2_1	AATTGAGACCAAATTCCCGG
IRF4	IRF4_Intron2_2	ATAACCGGTAGAGTGAGATG
IRF4	IRF4_Intron4_1	AGCACTGGCATTGAGACGGG
IRF4	IRF4_Intron4_2	CTGGCACCAAAAGTACCACA
IRF4	IRF4_Intron8_1	ATGCTAGAGAACATTACGAG
IRF4	IRF4_Intron8_2	AGAAACTATCCATTCCCTGG
ISL1	ISL1_Intron4_1	TTAGCCTGTGCAGACAACGG
ISL1	ISL1_Intron4_2	GCCGGGTAGCCTGTCCCCCG
ISL1	ISL1_Intron5_1	ACAGTTAGGTAATTGGCCAG
ISL1	ISL1_Intron5_2	CATTTGCAAACACAAGCCTG
ITPA	ITPA_Intron1_1	GAGGCACGGACTGCTCAGTG
ITPA	ITPA_Intron1_2	ACTTCAATAGGTGACCTTCG
ITPA	ITPA_Intron3_1	AACATGTGTGAATGCAGCGG
ITPA	ITPA_Intron3_2	CAATATTAACTGAACCCTAG
ITPA	ITPA_Intron6_2	CTTCTACCTATGCTGCGCAG
ITPA	ITPA_Intron6_1	GCTAAGTACCCTGAACTCCG
JDP2	JDP2_Intron2_2	GTAGCTGAGCAGTTTCATGG
JDP2	JDP2_Intron2_1	ACTACAGAGGCAAACCACGG
JDP2	JDP2_Intron3_1	CCAGGCAAGATACGCCCTAG
JDP2	JDP2_Intron3_2	TATGTACAGTGAATGCCCTG
KAT14	KAT14_Intron2_1	ACACATGCAGGGCTAATGTG
KAT14	KAT14_Intron2_2	TGTGGACCAATGTATCCACA
KAT14	KAT14_Intron6_1	CTTGAACTAAGTCCACAAGG
KAT14	KAT14_Intron6_2	TCTCCCAGAGAAGTGCTCGG
KAT14	KAT14_Intron9_1	AAATATACGTGATCTCACCG
KAT14	KAT14_Intron9_2	TATCAGATGACTGTCAACAG
KHK	KHK_Intron4_1	CCTCACCCAGAGTTTCAGCG
KHK	KHK_Intron4_2	GGCCTGACCCATTACCTCTG
KHK	KHK_Intron5_1	GTAGGGCTTAAACAGCCACA
KHK	KHK_Intron5_2	GACAGTGAGATGCTACGTTG
KL	KL_Intron1_1	GATTACCCCAGATAGCGAAG
KL	KL_Intron1_2	TTCAACTGTAGAGAGCACTG
KL	KL_Intron3_1	CCACAGTGGAATCCACTCTG
KL	KL_Intron3_2	ATTTGTGGGGTGCATCACAG
KLB	KLB_Intron1_2	CAACATATAAACCACCATGG
KLB	KLB_Intron1_1	GTAAAGATCACCATTCACAG
KLB	KLB_Intron3_1	TCAAACACGTCAATGCCATG
KLB	KLB_Intron3_2	GTTATGAATCTCAACCCCTG
KMT5A	KMT5A_Intron2_1	GGGACCATTCAACACCGAGG
KMT5A	KMT5A_Intron2_2	AAGATCCTAGAGCATTCACG
KMT5A	KMT5A_Intron5_1	AGACGGGAGTGACAACACTG
KMT5A	KMT5A_Intron5_2	TTAAATGCGCAGATACACAG
KMT5A	KMT5A_Intron6_1	TAAGCCGGAATCCCCCTAGG
KMT5A	KMT5A_Intron6_2	GAGAAGTACTCTCTACAGTG
KMT5C	KMT5C_Intron3_1	GAGGTTGGACTACATCTCAG
KMT5C	KMT5C_Intron3_2	AGGTTGGACTACATCTCAGA
KMT5C	KMT5C_Intron6_1	TTCCCATTATACACCCTGGG
KMT5C	KMT5C_Intron6_2	TAGGTGTTAAAGGAAATCAG
LACTB	LACTB_Intron1_2	AGCGTCTGACCACGGCTCGG
LACTB	LACTB_Intron1_1	CCGTGGTCAGACGCTCTTGG
LACTB	LACTB_Intron3_2	AATCCAGATGATAATCAGGT
LACTB	LACTB_Intron3_1	ATTACTGAGACATTATTCCG
LDHAL6A	LDHAL6A_Intron1_1	CATCTAGATATGAAACCCAG
LDHAL6A	LDHAL6A_Intron1_2	AGGTTGTGTCCAGTTCAAGG
LDHAL6A	LDHAL6A_Intron6_1	CGAACTATGGCAGAGTACCA
LDHAL6A	LDHAL6A_Intron6_2	GTCACACTAGACCAGGACAA
LDHC	LDHC_Intron2_1	TCGTTATGGCCCAAACAGGA
LDHC	LDHC_Intron2_2	AGAGTACGGAACTATATACA
LDHC	LDHC_Intron7_1	GTGTAGTCCAAACTACATCG
LDHC	LDHC_Intron7_2	CTAGTAACTTCTCCCCACAG
LDLR	LDLR_Intron12_2	TTTTTACTGAGAGTCGTGAA
LDLR	LDLR_Intron12_1	ATCCTGGGTTCTCGAGACCG
LDLR	LDLR_Intron17_1	GCGCTCATTCAGAATGTCAG
LDLR	LDLR_Intron17_2	AACATTCCTCTACACCACCA
LHPP	LHPP_Intron4_1	GAGAGCGGCAGGGTCCACGG
LHPP	LHPP_Intron4_2	ACAGAAGCCACAAGCCCGAG
LHPP	LHPP_Intron5_1	TGGCCCCGGAGAATGCACGG
LHPP	LHPP_Intron5_2	CCAGCATTAGAGTCACACTG
LIAS	LIAS_Intron1_1	GCCAGAGACTCTATATCATG
LIAS	LIAS_Intron1_2	TGTCTGCCGCTGAAGCCTAG
LIAS	LIAS_Intron6_2	GTATTTACATCCCAATAGAG
LIAS	LIAS_Intron6_1	CAGTAAACACGTAGTCAGGG
LIPC	LIPC_Intron2_1	ATGTTGCTGGAACGTCATGT
LIPC	LIPC_Intron2_2	AATCTGCATGTTACACACAG
LIPC	LIPC_Intron3_1	ATCCCTTAGCATGTCTAAGG
LIPC	LIPC_Intron3_2	AAGGTGGTTCTGTGAAACAG
LIPG	LIPG_Intron2_1	AGCCCCGTTTAAAGGCACTG
LIPG	LIPG_Intron2_2	CACAGGCAGAATCACTACGC
LIPG	LIPG_Intron3_1	AGTTTGGTTTCCGAGCCATG
LIPG	LIPG_Intron3_2	TGTCAGAGCACTCATCTGGG
LOXL1	LOXL1_Intron4_1	CCACTGGCTAGATGGACCAG
LOXL1	LOXL1_Intron4_2	GGTGGGCCAGAAACTCCTGA
LOXL1	LOXL1_Intron5_1	CTAGTGCCTAGAACTCAGAG
LOXL1	LOXL1_Intron5_2	TCATTTGGGAGACAGATGAG
LPL	LPL_Intron2_1	GGGACTGGACCAATTCAACA
LPL	LPL_Intron2_2	GCTGATGTATCTATGACAAG
LPL	LPL_Intron3_1	CTGACCAGGCAAATGAACAT
LPL	LPL_Intron3_2	CAAACGGGATCACCTCCCTG
LPO	LPO_Intron6_1	GCCAGAACGTGACCGCCACG
LPO	LPO_Intron6_2	GCCGCAGGCCAGATACCCTG
LPO	LPO_Intron7_1	ACTGCTGTACATCATCGTGG
LPO	LPO_Intron7_2	TATACTGCTGTACATCATCG
LPO	LPO_Intron9_1	GCTATAGTAATTGAGCACTG
LPO	LPO_Intron9_2	TATGGTCTCACAGAACCCAG
LYPLA2	LYPLA2_Intron3_1	TGAGGGCACAGCTCACTCAC
LYPLA2	LYPLA2_Intron4_2	CCTTTGTGTCTGCATCCTCG
LYPLA2	LYPLA2_Intron4_1	GCAGCAGTCCCCAAGCCACG
LYPLA2	LYPLA2_Intron5_2	CTGGCTGGAGGCAGAGAAGT
LYPLA2	LYPLA2_Intron5_1	CACGAGAGGCACCTGGCTGG
MACROD2	MACROD2_Intron6_2	GAACTGATAGATGACCCTCG
MACROD2	MACROD2_Intron6_1	TAGCAGGTAAGCTATCCCGG
MACROD2	MACROD2_Intron8_1	GTATTATACCTAGAACACTG
MACROD2	MACROD2_Intron8_2	GTATGATGAAACATGCACAG
MAEL	MAEL_Intron1_2	CAAGCCGCCTGACCTCCTCG
MAEL	MAEL_Intron1_1	AAACAGCCTATAGATTACCA
MAEL	MAEL_Intron5_1	CACGGTTATACTAAGTAGCA
MAEL	MAEL_Intron5_2	GCTGTCCTTTCAAAATGTGG
MAEL	MAEL_Intron9_1	TTATGAAGGAGGTACCACTG
MAEL	MAEL_Intron9_2	TATGCCTGTGACACTAAATG
MAPK8	MAPK8_Intron2_1	CGTTTGTCAAATGATGATGG
MAPK8	MAPK8_Intron2_2	TTTGCTGACGATGATACTTG
MAPK8	MAPK8_Intron4_1	AGAGAGATGAGTACCAATCG
MAPK8	MAPK8_Intron4_2	TCAGTTAGGCAAGGGCACGT
MAPK8	MAPK8_Intron7_2	CTGGGGGAACATCCTAACTC
MAPK8	MAPK8_Intron7_1	CTAGGATGTTGAATGCTCTG
METAP1D	METAP1D_Intron2_1	AAGGTTAACAGACCATCCAG
METAP1D	METAP1D_Intron2_2	ACTGCTGTGGAGCCTAACTG
METAP1D	METAP1D_Intron3_1	ATCTCAGTAAAACATTACAG
METAP1D	METAP1D_Intron3_2	TGTGTAATAAACTTACAACA
METAP1D	METAP1D_Intron5_1	GCTCTGCGTTAACTACACAG
METAP1D	METAP1D_Intron5_2	TGTTTATTCCAAGTAAACCC
METTL2A	METTL2A_Intron3_1	ATGATGCAGTGGCATGTGAC
METTL2A	METTL2A_Intron3_2	CCACTGCATCATACAGGTGA
METTL2A	METTL2A_Intron5_1	GGGTGAGCTTGTAAGGGACT
METTL2A	METTL2A_Intron5_2	TGGGAGGAGCAAGCACGTTG
METTL2B	METTL2B_Intron3_2	AGTGCAGACCAGATATCTGG
METTL2B	METTL2B_Intron3_1	ATCACAGACAAAGATCACAC
METTL2B	METTL2B_Intron5_1	TGGAAGAAGCAAGCACGTTG
METTL2B	METTL2B_Intron5_2	ACTGGAAGAAGCAAGCACGT
MFSD11	MFSD11_Intron2_1	CTTGGAGTCACACTTCCCAA
MFSD11	MFSD11_Intron2_2	GTGTCAGACATTTCTCATGG
MFSD11	MFSD11_Intron13_1	GAAACACAATATAGCCGGGG
MFSD11	MFSD11_Intron13_2	TAAGAAACACAATATAGCCG
MGMT	MGMT_Intron1_2	GGGGCGTGCTGATATCACAG
[truncated: 12,147 more rows]

## Sheet: Supplemental Table S2
# Supplemental Table S2: Alignment of NGS-based sgRNA amplicon sequencing results from the pool of GFP-positive cells to sgRNA sequences
sgRNA	number of reads in the GFP_pool
ATAD3A_Intron4_1	411
OXA1L_Intron1_1	354
VPS4B_Intron1_1	297
QARS_Intron18_1	249
CUL4B_Intron20_1	249
NDUFS6_Intron2_1	240
DPYSL2_Intron7_1	231
NUDT3_Intron1_2	216
PRDX3_Intron6_2	211
PARK7_Intron4_2	206
NXN_Intron3_1	206
P4HB_Intron9_1	201
TAF9B_Intron1_2	201
FMR1_Intron12_1	200
HUWE1_Intron8_1	200
EZH2_Intron4_1	199
TXNDC5_Intron5_1	198
COX6C_Intron2_2	185
CPT1B_Intron14_1	183
CA4_Intron5_1	176
UBE2N_Intron1_1	172
KMT5A_Intron2_1	164
PDHA1_Intron3_1	157
MORF4L1_Intron9_1	156
GSR_Intron2_1	156
ACAT1_Intron1_1	154
ITPA_Intron1_1	152
NAT10_Intron5_1	148
MTAP_Intron7_1	148
FMR1_Intron11_1	148
PARK7_Intron3_1	145
ACOT7_Intron2_2	145
PYGL_Intron4_1	139
ALG12_Intron2_2	139
TARS_Intron1_1	138
CTCF_Intron9_1	134
CYB5R3_Intron1_1	131
MEAF6_Intron1_1	131
KDM1A_Intron8_1	131
PKM_Intron3_1	131
PRDX3_Intron1_2	130
FUBP3_Intron9_1	128
IDI1_Intron4_3	128
PDE12_Intron1_1	128
GAPDH_Intron3_2	127
LARS2_Intron4_1	127
MDH2_Intron4_1	126
NDUFB11_Intron1_2	125
FASN_Intron24_1	125
NSUN2_Intron1_1	125
GARS_Intron1_1	125
TK1_Intron1_1	125
NDUFA10_Intron7_1	124
MPHOSPH8_Intron1_1	124
PPIF_Intron3_1	121
NDUFA7_Intron1_2	118
ECH1_Intron9_1	118
RUVBL1_Intron1_1	118
TARS_Intron9_1	117
ARG2_Intron1_2	116
NSDHL_Intron2_1	114
MAGT1_Intron6_1	114
CANX_Intron14_1	113
P4HB_Intron10_1	113
TAF10_Intron2_2	112
IDH3A_Intron2_1	112
PGAM1_Intron2_3	112
HIBCH_Intron2_1	111
GTF2B_Intron3_2	111
ATAD3B_Intron10_1	110
NDUFV2_Intron1_1	110
HSD17B10_Intron4_1	110
SNW1_Intron12_1	109
DBI_Intron2_2	108
DLAT_Intron4_1	108
ASXL1_Intron1_1	108
SHMT2_Intron8_1	108
NAT10_Intron26_1	107
FUBP3_Intron7_1	107
SETD1B_Intron16_1	107
PPOX_Intron2_1	107
FASN_Intron22_1	106
CERS2_Intron3_1	106
SMS_Intron5_2	106
NDUFA10_Intron9_1	105
SAT2_Intron1_1	105
IDH3A_Intron1_1	105
USP9X_Intron9_1	104
GART_Intron5_1	104
USP22_Intron1_2	102
MDH2_Intron6_1	102
TXNDC9_Intron2_1	102
USP9X_Intron42_1	101
PYCR2_Intron2_1	101
NDUFS8_Intron5_1	101
COX7A2_Intron2_2	101
PFKP_Intron3_2	100
KAT7_Intron1_1	100
FH_Intron3_1	99
CYP51A1_Intron1_1	97
KDM3B_Intron13_1	96
ACLY_Intron22_1	96
IDH3B_Intron2_1	96
NUDT5_Intron2_2	96
SDHA_Intron1_1	95
DPYSL5_Intron11_1	95
GATAD2A_Intron7_1	95
METTL17_Intron12_1	95
UBE2N_Intron1_2	94
HCFC1_Intron14_1	92
GLYR1_Intron10_1	92
CYB5R3_Intron2_1	92
FKBP3_Intron2_1	92
KAT7_Intron7_1	91
PLOD1_Intron7_1	91
ITPA_Intron1_2	91
MOV10L1_Intron18_1	91
SDHA_Intron9_1	90
ALDH7A1_Intron1_1	90
PRMT7_Intron4_1	90
EZH2_Intron3_1	90
SART3_Intron1_1	89
HPRT1_Intron1_1	89
COQ8A_Intron14_1	89
SEPHS1_Intron6_1	88
EPRS_Intron17_1	87
SET_Intron7_1	87
UHRF1_Intron9_1	87
DPYSL2_Intron1_1	86
PIP5K1A_Intron2_1	86
UAP1_Intron10_1	86
PLB1_Intron15_1	86
ATIC_Intron11_1	85
KDM3B_Intron7_1	85
KAT7_Intron8_1	85
CBX8_Intron1_1	85
MTA1_Intron2_1	85
NDUFS6_Intron3_1	84
SDHA_Intron14_1	84
BRD4_Intron5_1	84
SMNDC1_Intron5_2	84
HARS2_Intron3_1	84
COX20_Intron2_1	83
LBR_Intron6_1	83
SNW1_Intron7_1	83
AKAP8L_Intron13_1	83
USP36_Intron14_1	83
ETFA_Intron1_1	82
DDB1_Intron18_1	82
PRDX3_Intron6_1	82
GCSH_Intron2_3	82
CYP7A1_Intron2_2	82
NDUFS3_Intron3_1	81
HUWE1_Intron19_1	81
PPAT_Intron9_1	81
GTF3C4_Intron1_2	80
HADH_Intron2_1	80
IDE_Intron13_1	80
PPA1_Intron3_1	80
DARS2_Intron9_1	79
NXN_Intron7_1	79
LDLR_Intron12_1	79
PKM_Intron8_1	79
AMD1_Intron6_1	79
BAZ1B_Intron17_1	78
PIK3R4_Intron9_1	78
SET_Intron4_1	77
PLCB1_Intron2_1	77
VPS4A_Intron9_1	77
GPHN_Intron6_1	77
ADH5_Intron1_1	76
GLS_Intron13_1	76
PPIF_Intron1_1	76
TXNDC11_Intron2_1	76
GMPS_Intron9_1	75
PHGDH_Intron5_1	75
MTHFD1_Intron14_1	75
CTR9_Intron1_1	75
BRD4_Intron6_1	75
BLVRA_Intron2_1	75
FDPS_Intron10_1	75
TYMS_Intron4_1	75
CYC1_Intron1_1	74
KDM1A_Intron13_1	74
DARS2_Intron11_1	74
EPN1_Intron4_1	74
PNPO_Intron1_2	74
GUCY2D_Intron12_1	74
NOC2L_Intron4_1	73
PLCB3_Intron1_1	73
OSBPL11_Intron12_1	73
PDHB_Intron1_1	73
PRPS1_Intron2_2	73
PPA2_Intron2_1	73
DNMT1_Intron3_1	72
P4HB_Intron7_1	71
PPIF_Intron3_2	71
LYPLA1_Intron1_1	71
CCNA2_Intron1_1	71
FKBP4_Intron1_1	71
RTN4IP1_Intron3_1	71
POR_Intron3_1	71
NAT10_Intron7_1	70
NDUFAB1_Intron1_2	70
RRM1_Intron17_1	69
DPF2_Intron5_2	69
UQCRH_Intron1_1	68
CS_Intron4_1	68
ENO1_Intron6_2	68
USP9X_Intron37_1	68
SMS_Intron7_2	68
BRD4_Intron7_1	68
ADH1C_Intron5_1	68
CS_Intron6_1	67
MTHFD1L_Intron2_1	67
USP9X_Intron10_1	67
COX7B_Intron3_1	67
REXO2_Intron1_1	67
CTBP1_Intron2_2	67
PRDM16_Intron3_1	67
HADHA_Intron10_1	66
OAT_Intron6_1	66
NNT_Intron21_1	66
NDUFS3_Intron4_1	66
ING5_Intron3_2	66
GFPT1_Intron19_1	66
NDUFA5_Intron3_1	65
NXN_Intron3_2	65
FBL_Intron5_1	65
ELAC2_Intron13_1	65
EED_Intron1_1	65
APEH_Intron10_1	65
MSRB2_Intron4_2	65
FASN_Intron32_1	64
GOT2_Intron9_1	64
GOT2_Intron3_1	64
CS_Intron3_1	64
FH_Intron5_1	64
SDHB_Intron7_1	64
CDC73_Intron7_1	64
CNDP2_Intron5_1	64
BEND3_Intron3_1	64
RUVBL1_Intron6_1	63
ALDH9A1_Intron6_1	63
PLCG1_Intron25_1	63
ATAD3B_Intron15_1	63
PFKP_Intron1_1	63
COX5B_Intron2_2	62
GYG1_Intron6_1	62
OSBPL8_Intron6_1	62
RPIA_Intron1_1	62
HCCS_Intron3_2	62
QARS_Intron9_1	62
TRIM28_Intron14_1	61
PSAT1_Intron1_2	61
NDUFA4_Intron1_2	61
GALNT6_Intron7_1	61
GSR_Intron1_1	60
TPI1_Intron5_2	60
TRMT6_Intron10_1	60
GPX4_Intron1_1	60
FKBP9_Intron9_3	60
POMGNT1_Intron20_1	60
SAP30_Intron1_1	60
OBSCN_Intron66_1	60
CAD_Intron20_1	59
SIN3A_Intron5_1	59
MARS_Intron11_1	59
CTR9_Intron20_1	59
UQCRC2_Intron11_1	59
ERI1_Intron1_1	59
METTL17_Intron10_1	59
SNCA_Intron4_1	59
COPRS_Intron1_2	58
HSD17B4_Intron13_1	58
SMARCAD1_Intron7_1	58
BCKDHA_Intron8_1	58
PRDX5_Intron2_1	57
CTCF_Intron8_2	57
MEAF6_Intron3_2	57
TFAM_Intron4_1	57
MTHFD1_Intron21_1	57
DLST_Intron1_1	57
NDUFB8_Intron4_1	57
DAGLA_Intron7_1	57
HCFC1_Intron11_1	56
CERS2_Intron5_1	56
ADSL_Intron11_1	56
COX8A_Intron1_3	56
GMPS_Intron7_1	56
OXCT1_Intron1_1	56
GM2A_Intron3_2	56
AASS_Intron8_1	56
IDH1_Intron4_2	55
LMNA_Intron8_1	55
HADHA_Intron5_1	55
GSTP1_Intron3_1	55
MTHFD1_Intron26_2	55
GANAB_Intron21_1	55
HDAC1_Intron6_2	55
HCFC1_Intron18_1	55
PRIM1_Intron5_1	55
PDHB_Intron5_1	55
GCKR_Intron15_1	55
ODC1_Intron3_1	54
ATAD3A_Intron8_1	54
TXNDC5_Intron3_1	54
BAZ1B_Intron13_1	54
ELOVL5_Intron7_1	54
CTNNB1_Intron4_1	54
ETFB_Intron1_1	54
ALDH18A1_Intron6_1	54
APEH_Intron1_1	54
RARS_Intron3_1	53
TXNDC5_Intron6_1	53
TECR_Intron1_1	53
NonTargeting_control26	53
NOC2L_Intron16_1	53
FH_Intron8_1	53
CMBL_Intron5_2	53
ACLY_Intron25_1	53
NDUFS3_Intron6_1	53
TADA3_Intron2_1	53
COX20_Intron1_1	53
NDUFS7_Intron4_1	53
ECHS1_Intron7_2	52
DR1_Intron3_2	52
NDUFS6_Intron3_2	52
H2AFY_Intron4_1	52
LTA4H_Intron13_1	52
DHTKD1_Intron16_1	52
AKAP8_Intron5_1	52
DDOST_Intron6_1	52
PUS1_Intron2_2	52
GFPT1_Intron13_1	52
DUT_Intron6_2	52
HAT1_Intron4_1	51
CMAS_Intron6_1	51
GTF2B_Intron3_1	51
GSTP1_Intron5_2	51
MTHFD1_Intron13_1	51
TRIM28_Intron12_1	51
NARS2_Intron4_1	51
ACYP1_Intron2_3	51
OCA2_Intron9_1	51
HMGA2_Intron2_2	51
OAT_Intron8_1	50
FH_Intron4_1	50
SCD_Intron1_1	50
KARS_Intron7_1	50
SUCLG1_Intron8_1	50
SNW1_Intron8_1	50
ACLY_Intron16_1	50
ALDH18A1_Intron10_1	50
PDHB_Intron2_1	50
ALG3_Intron5_2	50
AURKA_Intron3_1	50
CETP_Intron8_1	50
P4HB_Intron6_1	49
NAMPT_Intron9_1	49
AARS2_Intron17_1	49
CUL4B_Intron5_1	49
ACAA1_Intron1_2	49
CAD_Intron25_1	49
EP300_Intron30_1	49
ATRX_Intron15_1	49
GPT2_Intron2_1	49
NDUFB5_Intron2_1	49
COX15_Intron1_1	49
CXXC1_Intron1_1	49
P4HB_Intron5_1	48
RUVBL1_Intron2_1	48
UMPS_Intron1_2	48
ACBD7_Intron1_3	48
NCEH1_Intron4_2	48
MSR1_Intron4_2	48
GCSH_Intron2_1	47
PDE12_Intron1_2	47
NDUFA4_Intron3_1	47
NAA40_Intron2_2	47
MTHFD1_Intron19_1	47
SIN3A_Intron12_1	47
NDUFA5_Intron2_1	47
NOC2L_Intron8_1	47
UQCRH_Intron1_2	47
SPTLC2_Intron1_1	47
COX5B_Intron2_1	47
ACLY_Intron10_1	47
INSIG2_Intron5_2	47
ADA_Intron8_1	47
SHMT2_Intron5_1	47
NDUFV1_Intron1_1	46
SET_Intron5_1	46
NT5C3B_Intron1_1	46
CAD_Intron28_1	46
ARID4B_Intron2_1	46
BCAT1_Intron1_1	46
SMNDC1_Intron2_2	46
MME_Intron14_1	46
METTL14_Intron1_1	45
DNMT1_Intron6_1	45
FMR1_Intron1_1	45
UNG_Intron1_1	45
SDHA_Intron13_1	45
RTF1_Intron2_1	45
CS_Intron10_1	45
DDB1_Intron8_1	45
RRM1_Intron18_1	45
USP9X_Intron2_1	45
SCARB1_Intron11_1	45
PAICS_Intron6_1	45
DNMT1_Intron8_1	45
PRPS1_Intron2_1	44
HCFC1_Intron10_1	44
ACP1_Intron2_1	44
CAD_Intron34_1	44
DNMT1_Intron12_1	44
JMJD8_Intron8_1	44
USP3_Intron5_1	44
COX6C_Intron2_1	44
NAGS_Intron3_2	44
HSD11B1L_Intron3_1	44
PADI3_Intron15_1	44
PDSS1_Intron1_1	43
SKP1_Intron4_1	43
FASN_Intron23_1	43
PARP1_Intron1_3	43
EPRS_Intron3_1	43
GAPDH_Intron5_1	43
KDM3B_Intron3_1	43
AGPS_Intron13_1	43
ATAD3B_Intron4_1	43
MIER1_Intron3_1	43
PDHB_Intron4_1	43
ETFA_Intron11_1	43
PYGO2_Intron2_2	43
MAP3K7_Intron7_2	43
LMF1_Intron6_1	43
JMJD6_Intron1_1	43
NME1_Intron3_1	43
CHI3L2_Intron8_1	43
HMGA2_Intron1_1	43
SET_Intron6_1	42
TXNRD1_Intron13_1	42
USP9X_Intron16_1	42
TBL1XR1_Intron3_2	42
NUDT21_Intron4_1	42
ATIC_Intron14_1	42
PYGB_Intron9_1	42
CERS6_Intron7_1	42
ACADSB_Intron9_1	42
NDUFS1_Intron10_1	42
SREBF1_Intron5_1	42
LARS_Intron14_1	42
NDUFA7_Intron1_1	42
ACSM4_Intron1_1	42
CYP26C1_Intron5_1	42
SMNDC1_Intron5_1	41
CAT_Intron1_1	41
ACAT1_Intron5_1	41
AFG3L2_Intron8_1	41
NDUFA1_Intron2_1	41
DLD_Intron4_1	41
NDUFB2_Intron2_3	41
NNT_Intron9_1	41
GCLM_Intron1_1	41
ARID4B_Intron18_1	41
MDH1_Intron2_1	41
PHKA1_Intron10_1	41
PYGO2_Intron2_1	41
BRPF3_Intron9_1	41
GUCY2C_Intron2_1	41
SOD1_Intron1_1	40
GPHN_Intron17_1	40
UQCRC2_Intron13_1	40
DPY30_Intron3_1	40
EPRS_Intron12_1	40
HMGCR_Intron11_1	40
USP9X_Intron5_1	40
VAT1_Intron5_2	40
FUBP3_Intron13_1	40
NXN_Intron7_2	40
PDHA1_Intron1_1	40
CARS2_Intron9_1	40
TXNRD1_Intron2_1	40
LDHA_Intron2_3	40
ACOT7_Intron2_1	40
POFUT1_Intron3_2	40
DPY30_Intron2_2	39
MMADHC_Intron2_1	39
COX7A2_Intron2_1	39
HSD17B4_Intron16_1	39
NAT10_Intron11_1	39
GTF3C4_Intron1_1	39
UBE2N_Intron1_3	39
PRPS1_Intron5_2	39
BSCL2_Intron5_1	39
GYG1_Intron6_2	38
HADHA_Intron3_1	38
DLAT_Intron8_1	38
CAD_Intron13_1	38
RTF1_Intron1_1	38
NRDC_Intron22_1	38
PPIF_Intron1_2	38
ACO2_Intron15_1	38
FBL_Intron4_2	38
MTA2_Intron13_1	38
VAT1_Intron1_2	38
NDUFS5_Intron2_1	38
ACLY_Intron12_1	38
PLOD3_Intron8_1	38
NDUFS6_Intron1_2	38
NDUFB6_Intron2_2	38
ENDOG_Intron1_1	38
PKM_Intron7_1	38
AUH_Intron6_1	38
APRT_Intron3_3	38
IARS_Intron3_1	38
FASN_Intron7_1	37
APEX1_Intron3_1	37
HDAC2_Intron7_1	37
PHGDH_Intron1_1	37
GLO1_Intron1_1	37
SOD1_Intron4_1	37
MARS_Intron18_1	37
RIF1_Intron25_1	37
GSR_Intron4_1	37
DPYSL3_Intron12_1	37
DBI_Intron2_3	37
SV2B_Intron5_1	37
OTC_Intron7_1	37
SULT1C3_Intron3_1	37
NDUFA10_Intron1_1	36
EPRS_Intron18_1	36
NDUFS6_Intron1_1	36
NUDT5_Intron2_3	36
OXCT1_Intron15_1	36
HADHA_Intron14_1	36
HDAC1_Intron6_1	36
LTA4H_Intron15_1	36
NDUFAB1_Intron2_1	36
PYGB_Intron4_1	36
SART3_Intron16_1	36
FMR1_Intron10_1	36
FMR1_Intron8_1	36
GLS_Intron2_1	36
AQP1_Intron2_1	36
COX7B_Intron3_2	35
MDH2_Intron1_1	35
PAICS_Intron4_1	35
CAD_Intron29_1	35
PRMT1_Intron9_1	35
PFKP_Intron3_1	35
MAN2A2_Intron21_1	35
GOT2_Intron2_1	35
AFG3L2_Intron9_1	35
RTF1_Intron8_1	35
SEPHS1_Intron4_1	35
GSS_Intron9_1	35
PLIN3_Intron2_1	35
NDUFV3_Intron1_1	35
GLS_Intron4_1	35
PFKM_Intron10_1	35
ACOT11_Intron9_1	35
P2RX7_Intron9_1	35
HAO2_Intron6_1	35
NDUFAB1_Intron1_1	34
GLYR1_Intron6_1	34
GAPDH_Intron7_2	34
LARS_Intron12_1	34
USP22_Intron9_1	34
RPA1_Intron2_1	34
AFG3L2_Intron14_1	34
H2AFY_Intron4_2	34
NSUN2_Intron4_1	34
CTNNB1_Intron8_1	34
HCFC1_Intron9_1	34
PFKL_Intron12_1	34
PARK7_Intron3_2	34
PAXIP1_Intron18_1	34
HCCS_Intron3_1	34
BCAT2_Intron2_1	34
PI4KB_Intron11_1	34
ALG3_Intron3_1	34
GATAD2A_Intron5_1	34
ASH2L_Intron5_1	34
CTH_Intron1_1	34
PIGK_Intron4_1	34
GARS_Intron6_1	33
IARS2_Intron1_1	33
GLOD4_Intron1_1	33
DHCR24_Intron6_1	33
HUWE1_Intron12_1	33
RTF1_Intron5_1	33
UGGT1_Intron17_1	33
DPF2_Intron4_2	33
KMT2B_Intron11_1	33
GMDS_Intron1_1	33
GATAD2A_Intron10_1	33
NTPCR_Intron3_2	33
UROC1_Intron7_1	33
TRIP12_Intron12_1	32
ALDH18A1_Intron3_1	32
NDUFAF8_Intron1_1	32
LDHA_Intron2_2	32
KMT2A_Intron1_1	32
AHCY_Intron9_1	32
MORF4L1_Intron8_1	32
AFG3L2_Intron6_1	32
BAZ1B_Intron3_1	32
ADH5_Intron5_1	32
SIN3A_Intron9_1	32
GPD2_Intron2_1	32
NAMPT_Intron1_1	32
RETSAT_Intron9_2	32
UQCRB_Intron3_3	32
NDUFS4_Intron2_1	32
SIRT6_Intron1_2	32
PPA2_Intron4_1	32
PDE6C_Intron15_1	32
ANGPTL4_Intron2_2	32
PLA2G4F_Intron8_1	32
GLYR1_Intron7_1	31
PPA2_Intron3_1	31
ENO1_Intron4_1	31
NDUFS6_Intron2_2	31
MDH1_Intron1_1	31
COQ10A_Intron3_1	31
CS_Intron1_1	31
NDUFS8_Intron5_2	31
FMR1_Intron3_1	31
UPB1_Intron7_1	31
UQCRH_Intron3_1	31
KDM1A_Intron18_1	31
AASDHPPT_Intron5_1	31
ADH5_Intron2_1	31
GPI_Intron9_1	31
EHMT1_Intron7_1	31
ADSS_Intron1_2	31
FKBP8_Intron8_1	31
ME1_Intron1_1	31
GLYR1_Intron12_1	31
DNMT1_Intron21_1	31
APOO_Intron1_1	31
COX5A_Intron3_3	31
PRKD1_Intron1_1	31
APEH_Intron12_1	31
PIGG_Intron7_1	31
FKBP3_Intron3_1	31
APOBR_Intron3_1	31
PDE4C_Intron14_1	31
SOD1_Intron4_2	30
PGK1_Intron4_2	30
SDHB_Intron5_1	30
COX8A_Intron1_2	30
SFPQ_Intron1_1	30
KDM1A_Intron11_1	30
RCOR1_Intron4_1	30
NOC2L_Intron7_1	30
PFAS_Intron15_1	30
CAD_Intron10_1	30
NDUFV1_Intron4_1	30
TRIP12_Intron24_1	30
ETFB_Intron4_1	30
UQCRC1_Intron1_1	30
FKBP8_Intron3_1	30
PIP5K1A_Intron14_1	30
SART3_Intron14_1	30
GLYR1_Intron8_1	30
USP7_Intron6_1	30
HARS2_Intron10_1	30
GPAT3_Intron6_1	30
FPGS_Intron2_1	30
SETD6_Intron1_2	30
ACOT7_Intron4_2	30
GLUL_Intron6_3	30
ACSM3_Intron9_1	30
FMO1_Intron2_2	30
COX7C_Intron1_1	29
HSD17B10_Intron2_1	29
TAF9B_Intron1_1	29
NSUN6_Intron1_1	29
ACO1_Intron18_1	29
AURKA_Intron3_2	29
OGT_Intron3_1	29
ST3GAL2_Intron2_2	29
APRT_Intron3_2	29
USP22_Intron1_1	29
CYC1_Intron1_2	29
H2AFY_Intron5_2	29
GLUD1_Intron11_1	29
LTA4H_Intron9_1	29
LARS2_Intron3_1	29
UQCRC2_Intron2_1	29
DUS3L_Intron3_1	29
MBOAT2_Intron1_1	29
CYB5R3_Intron7_1	29
PGLS_Intron1_1	29
CRTC2_Intron1_1	29
MBD3_Intron3_2	29
HARS2_Intron1_1	29
CHID1_Intron12_1	29
PFKP_Intron1_2	29
ALDH1L1_Intron15_1	29
THEM5_Intron1_3	29
NDUFA4_Intron3_2	28
UHRF1_Intron10_1	28
DPYSL5_Intron5_1	28
LBR_Intron10_1	28
PTGES3_Intron6_1	28
COX7C_Intron1_3	28
USP7_Intron24_1	28
RNF40_Intron8_1	28
TRMT6_Intron7_1	28
ACLY_Intron7_1	28
PAXIP1_Intron1_1	28
SUCLA2_Intron5_1	28
PGAM1_Intron2_1	28
MAT2A_Intron7_1	28
GLO1_Intron1_2	28
PGD_Intron12_1	28
ACO2_Intron8_1	28
ATAD2_Intron26_1	28
OXCT1_Intron13_1	28
LARS2_Intron8_1	28
PYGL_Intron1_1	28
GLOD4_Intron9_1	28
SART3_Intron4_1	28
MEN1_Intron8_1	28
COX6B1_Intron3_3	28
TAF1_Intron1_1	28
MEAF6_Intron1_2	28
PRPSAP1_Intron9_1	28
MTA3_Intron13_1	28
IDH3G_Intron12_1	28
COX5A_Intron3_1	28
OGT_Intron18_1	28
QDPR_Intron1_2	28
ESD_Intron10_1	28
GSR_Intron12_1	28
GMPR2_Intron2_1	28
BCOR_Intron3_1	28
PAM_Intron10_1	28
TMCO3_Intron3_1	28
LSS_Intron2_1	28
ANGPTL4_Intron1_1	28
LEP_Intron2_2	28
PAPSS1_Intron5_1	27
CAD_Intron23_1	27
MAGT1_Intron1_1	27
WDR82_Intron6_1	27
ACO2_Intron13_1	27
USP9X_Intron17_1	27
MTHFD1_Intron18_1	27
MTHFD1_Intron4_1	27
PANK3_Intron2_1	27
TAF9B_Intron4_2	27
COPRS_Intron1_1	27
BRD4_Intron3_1	27
CUL4B_Intron11_1	27
NAA40_Intron1_2	27
GLA_Intron5_1	27
TAF12_Intron2_2	27
MBD3_Intron3_1	27
TNFRSF1A_Intron1_2	27
FLAD1_Intron5_2	27
MGAT5_Intron4_1	27
OGT_Intron11_1	27
DCXR_Intron2_2	27
CYP26B1_Intron5_1	27
TFB1M_Intron5_1	27
POR_Intron5_1	27
AK2_Intron1_1	27
MANBAL_Intron3_2	27
AHCYL1_Intron13_1	27
GPHN_Intron7_1	27
HDAC9_Intron9_1	27
ACE_Intron2_2	27
UPP1_Intron5_2	27
ALDH2_Intron10_1	27
RUVBL1_Intron4_1	26
UQCRH_Intron2_2	26
P4HB_Intron3_1	26
LDHB_Intron2_2	26
MMADHC_Intron4_1	26
NNT_Intron17_1	26
RARS_Intron10_1	26
PLCB3_Intron22_1	26
SCD_Intron1_2	26
IMPDH2_Intron4_1	26
PRDX6_Intron2_1	26
PRDX5_Intron3_1	26
RTF1_Intron12_1	26
FUBP3_Intron18_1	26
MDH2_Intron5_1	26
ETFB_Intron5_1	26
ACBD3_Intron5_1	26
NDUFB4_Intron2_1	26
DR1_Intron3_3	26
TFAM_Intron3_1	26
FLVCR1_Intron9_1	26
NNT_Intron16_1	26
TAF1_Intron5_1	26
EYA4_Intron10_1	26
APRT_Intron3_1	26
ADH7_Intron1_1	26
GARS_Intron14_1	25
GLO1_Intron1_3	25
RIF1_Intron24_1	25
NDUFA7_Intron1_3	25
CTCF_Intron5_2	25
PFAS_Intron17_1	25
RPA1_Intron13_1	25
ECHS1_Intron3_1	25
IWS1_Intron7_1	25
NDUFB8_Intron3_2	25
UBR5_Intron54_1	25
SUCLG2_Intron4_1	25
CDC73_Intron5_1	25
BRD7_Intron8_1	25
CTPS1_Intron6_1	25
DPYSL4_Intron11_1	25
CUL4B_Intron8_1	25
MIER2_Intron1_1	25
AKR1A1_Intron8_1	25
MBD3_Intron2_1	25
BAZ1A_Intron7_1	25
OGT_Intron8_1	25
MORF4L1_Intron2_1	25
CERS2_Intron6_1	25
PCGF6_Intron1_1	25
CLYBL_Intron7_1	25
ACOT7_Intron4_1	25
CYP20A1_Intron1_1	25
PLCE1_Intron28_1	25
AKR1C2_Intron5_1	25
PARP1_Intron1_2	24
CNDP2_Intron2_1	24
NDUFA9_Intron5_1	24
RARS_Intron1_1	24
LARS_Intron7_1	24
QARS_Intron23_1	24
PRDX6_Intron4_2	24
GPI_Intron15_1	24
ATAD2_Intron1_1	24
HADHA_Intron16_1	24
FASN_Intron42_1	24
DDB1_Intron21_1	24
RRM2_Intron2_1	24
RRM1_Intron10_1	24
EPRS_Intron15_1	24
HADHA_Intron9_1	24
DPYSL5_Intron6_1	24
EP300_Intron12_1	24
NDUFA1_Intron1_2	24
OGDH_Intron18_1	24
NDUFS2_Intron11_1	24
NDUFS2_Intron12_1	24
SUZ12_Intron12_1	24
PARK7_Intron2_1	24
ELAC2_Intron23_1	24
AKR7A2_Intron3_1	24
RPIA_Intron4_1	24
GALNT10_Intron1_1	24
NT5C3A_Intron1_1	24
PIGO_Intron11_1	24
MBOAT1_Intron1_1	24
COX20_Intron1_2	24
ARG1_Intron4_1	24
HMBS_Intron1_1	23
CNDP2_Intron8_1	23
NNT_Intron13_1	23
PIGK_Intron1_1	23
LIAS_Intron1_2	23
RARS_Intron12_1	23
ALDH18A1_Intron8_1	23
FKBP4_Intron7_1	23
NDUFA1_Intron1_1	23
GMPS_Intron10_1	23
DLST_Intron13_1	23
USP9X_Intron24_1	23
SDHB_Intron6_1	23
GSS_Intron10_1	23
NDUFB5_Intron4_2	23
POLRMT_Intron5_1	23
PUS7_Intron4_1	23
AKAP8L_Intron7_1	23
NAA35_Intron21_1	23
FLCN_Intron9_1	23
SMYD2_Intron8_1	23
SARS2_Intron4_1	23
FLAD1_Intron5_1	23
KEAP1_Intron2_2	23
OGFOD3_Intron7_1	23
SIRT3_Intron5_1	23
TARS_Intron6_1	23
ACSF2_Intron2_1	23
UIMC1_Intron4_1	23
KYAT3_Intron12_1	23
ALDH3A2_Intron1_1	23
BCL6_Intron8_2	23
GPHN_Intron3_1	23
NME1_Intron4_2	23
ST3GAL4_Intron10_2	23
LPL_Intron3_2	23
GFI1_Intron5_1	23
PHOSPHO1_Intron2_2	23
PDE2A_Intron28_1	23
PON1_Intron3_1	23
CYP3A5_Intron4_1	23
CYP4B1_Intron10_1	23
HTR3D_Intron3_3	23
TFB2M_Intron6_1	22
PRDX3_Intron1_1	22
PRMT5_Intron12_1	22
DPYSL2_Intron11_1	22
LYPLA1_Intron7_1	22
MOCS1_Intron1_1	22
GYS1_Intron9_1	22
LDHB_Intron7_2	22
HUWE1_Intron41_1	22
HK2_Intron11_1	22
RTF1_Intron11_1	22
CTR9_Intron23_1	22
SIN3A_Intron2_1	22
SIN3A_Intron3_1	22
NDUFB8_Intron3_1	22
IDH3B_Intron9_1	22
LEO1_Intron11_1	22
PPM1D_Intron5_2	22
EPN1_Intron5_2	22
BRD8_Intron13_1	22
PRPSAP2_Intron7_2	22
PCCB_Intron1_1	22
PRIM1_Intron8_1	22
DCTD_Intron2_3	22
MSL3_Intron1_1	22
USP7_Intron22_1	22
USP7_Intron25_1	22
WARS2_Intron3_1	22
CHTOP_Intron1_1	22
CBX8_Intron4_1	22
HDAC6_Intron7_1	22
JDP2_Intron3_2	22
HDAC7_Intron9_1	22
NAGK_Intron2_1	22
ACADVL_Intron3_1	22
PRMT5_Intron7_1	22
REXO4_Intron1_1	22
TXNIP_Intron4_2	22
STPG4_Intron1_2	22
CTCFL_Intron8_1	22
ADCY4_Intron10_1	22
ST8SIA1_Intron2_3	22
TRIM28_Intron16_1	21
RPA2_Intron5_1	21
NDUFB11_Intron1_3	21
SFPQ_Intron2_1	21
HCFC1_Intron12_1	21
REXO2_Intron1_2	21
PNPT1_Intron13_1	21
KDM1A_Intron1_1	21
PARK7_Intron4_1	21
DGKQ_Intron4_1	21
JADE3_Intron3_3	21
PDE9A_Intron16_1	21
FASN_Intron34_1	21
CS_Intron8_1	21
AHCY_Intron8_1	21
ACO2_Intron14_1	21
HMGCS1_Intron10_2	21
SMPD4_Intron16_1	21
SUPT6H_Intron35_1	21
PYCR1_Intron5_1	21
GNPNAT1_Intron4_2	21
UQCRC1_Intron11_1	21
CMBL_Intron5_1	21
WAC_Intron2_1	21
ARG2_Intron1_1	21
TADA3_Intron4_2	21
FKBP10_Intron9_2	21
ENOPH1_Intron1_1	21
QSOX1_Intron9_1	21
TAF1_Intron34_1	21
INPP5F_Intron3_1	21
TIGAR_Intron4_1	21
FN3K_Intron4_1	21
ACOX1_Intron13_1	21
KDM6A_Intron2_1	21
ITPKC_Intron6_1	21
TRMT1_Intron9_1	21
SMAD4_Intron2_1	21
MANBA_Intron13_1	21
RNF40_Intron2_1	21
OAS3_Intron15_1	21
TKFC_Intron14_1	21
DCAF1_Intron15_1	21
HDAC10_Intron7_1	21
ZNF451_Intron2_1	21
ACO1_Intron15_1	21
ITPR3_Intron5_1	21
NUDT14_Intron1_1	21
ALDH4A1_Intron6_1	21
HSD17B14_Intron8_1	21
CRYZL1_Intron9_1	21
B3GNTL1_Intron6_1	21
PTGIS_Intron2_1	21
IMPDH1_Intron7_1	21
HMGA2_Intron3_1	21
GLDC_Intron17_1	21
ALDH1L1_Intron18_1	21
HKDC1_Intron13_1	21
UGT1A10_Intron1_1	21
KARS_Intron2_1	20
KARS_Intron6_1	20
SUCLG1_Intron4_1	20
SMS_Intron7_1	20
PARK7_Intron2_2	20
RPA1_Intron9_1	20
NARS2_Intron3_1	20
NME3_Intron2_1	20
PDE6B_Intron12_1	20
HDAC3_Intron9_1	20
HK1_Intron12_1	20
LRTOMT_Intron4_3	20
ALDOA_Intron3_1	20
NRDC_Intron14_1	20
COX6A1_Intron2_2	20
PRDX6_Intron2_2	20
HMGCS1_Intron10_3	20
CYC1_Intron6_2	20
HUWE1_Intron4_1	20
RTF1_Intron16_1	20
USP9X_Intron28_1	20
GNS_Intron6_1	20
TRIP12_Intron33_1	20
VRK1_Intron11_1	20
RUVBL2_Intron1_1	20
PUS7_Intron4_2	20
BRD7_Intron2_1	20
ALDH18A1_Intron12_1	20
TXNDC9_Intron2_2	20
CYB5B_Intron1_1	20
PWP1_Intron1_1	20
NIPBL_Intron27_1	20
MVK_Intron9_1	20
OGDHL_Intron8_1	20
LARS_Intron15_1	20
DMAP1_Intron2_1	20
UGP2_Intron8_1	20
NDUFAF3_Intron2_2	20
PGM3_Intron8_1	20
ACYP1_Intron2_1	20
PRPS2_Intron2_1	20
GDPD1_Intron9_1	20
ABHD11_Intron2_2	20
PHF8_Intron13_1	20
TAF10_Intron4_2	20
MCOLN2_Intron12_1	20
PDE2A_Intron21_1	20
APOC1_Intron2_3	20
ALDH1L2_Intron1_1	20
TKTL1_Intron6_1	20
CFTR_Intron14_1	20
PNPLA5_Intron3_2	20
UGT2B28_Intron2_2	20
PGM2_Intron1_1	19
ENO1_Intron10_2	19
GATAD2A_Intron9_1	19
PSAT1_Intron1_1	19
VPS29_Intron2_1	19
NDUFAF4_Intron2_2	19
SEPHS1_Intron6_2	19
SUPT7L_Intron4_1	19
BTD_Intron4_1	19
ADCY4_Intron2_1	19
MTHFD1_Intron26_1	19
DARS2_Intron14_1	19
NDUFB9_Intron3_1	19
PAF1_Intron12_1	19
EARS2_Intron6_2	19
OTUB1_Intron3_1	19
SIRT1_Intron4_2	19
RCOR1_Intron7_1	19
PRPSAP2_Intron10_2	19
CDK9_Intron2_2	19
SMARCAD1_Intron9_1	19
NDUFA5_Intron1_1	19
FMR1_Intron4_1	19
MIER1_Intron10_1	19
MIER1_Intron6_1	19
NDUFA10_Intron5_1	19
PHKB_Intron22_1	19
HDAC6_Intron2_1	19
INPP4A_Intron6_1	19
GSTP1_Intron3_2	19
UBR2_Intron16_1	19
TXNRD1_Intron5_1	19
GYS1_Intron14_1	19
ISYNA1_Intron2_1	19
DGKZ_Intron29_1	19
PGAM5_Intron4_3	19
LGSN_Intron1_2	19
IARS_Intron1_1	19
CIDEA_Intron2_2	19
FMO3_Intron2_2	19
PNPLA5_Intron3_1	19
GLUD1_Intron12_1	18
ACAD9_Intron16_1	18
MPHOSPH8_Intron2_1	18
NAT10_Intron25_1	18
SUCLG2_Intron1_1	18
RRM2_Intron3_1	18
NOC2L_Intron13_1	18
IMPDH2_Intron5_1	18
PGD_Intron11_1	18
PGD_Intron7_1	18
ACO2_Intron17_1	18
KDM1A_Intron6_1	18
EP300_Intron2_1	18
AKR1B1_Intron7_1	18
DLST_Intron14_1	18
ATRX_Intron14_1	18
NSUN2_Intron16_1	18
USP9X_Intron34_1	18
FUBP3_Intron1_1	18
FKBP5_Intron7_1	18
DPF2_Intron4_1	18
ETNK1_Intron1_2	18
RLF_Intron7_1	18
AARS2_Intron19_1	18
METTL9_Intron1_3	18
ITGAV_Intron3_1	18
SUCLA2_Intron10_1	18
NNT_Intron8_1	18
TBL1X_Intron13_1	18
GCLM_Intron2_2	18
CYB561_Intron4_2	18
ARID4B_Intron15_1	18
GALM_Intron2_2	18
FKBP2_Intron2_1	18
RNF40_Intron14_1	18
DHCR7_Intron7_1	18
GALNT5_Intron9_1	18
TXNRD1_Intron10_1	18
UAP1_Intron5_2	18
GPHN_Intron8_1	18
KDM5C_Intron1_1	18
PTGS2_Intron6_2	18
IYD_Intron4_3	18
ARG1_Intron1_2	18
PIK3R5_Intron11_1	18
GRHL2_Intron4_1	18
GOT2_Intron5_1	17
APEX1_Intron3_3	17
PCCB_Intron3_1	17
TKT_Intron11_1	17
METTL3_Intron3_1	17
RRM1_Intron8_1	17
GART_Intron7_1	17
HUWE1_Intron38_1	17
RNF40_Intron12_1	17
NDUFV3_Intron1_3	17
ALDH9A1_Intron5_1	17
SMPD4_Intron12_1	17
MTR_Intron2_1	17
UHRF1_Intron15_1	17
FASN_Intron13_1	17
MAT2A_Intron6_1	17
DHCR24_Intron7_1	17
TXNDC5_Intron7_1	17
RRM1_Intron12_1	17
HADHA_Intron15_1	17
KDM1A_Intron3_1	17
HDAC1_Intron7_2	17
ATIC	17
NDUFV1_Intron9_1	17
NSUN2_Intron10_1	17
LTA4H_Intron16_1	17
DHTKD1_Intron8_1	17
NDUFS5_Intron2_2	17
ADH5_Intron6_1	17
GPT2_Intron10_1	17
STAT5B_Intron4_1	17
PDHX_Intron3_1	17
IDH3B_Intron11_1	17
GSS_Intron2_1	17
PHKA2_Intron11_1	17
NANS_Intron4_1	17
ELOVL2_Intron4_1	17
RPIA_Intron7_1	17
PCCB_Intron13_1	17
MAN1A1_Intron5_1	17
SIN3B_Intron14_1	17
TAF1_Intron20_1	17
FKBP15_Intron9_1	17
PHF10_Intron1_1	17
NPC1_Intron13_1	17
TRRAP_Intron42_1	17
KDM6A_Intron13_1	17
OTUD4_Intron10_1	17
JMJD4_Intron4_2	17
EBPL_Intron1_1	17
IDH2_Intron8_1	17
ALAS1_Intron9_3	17
MDH1_Intron5_1	17
ALDH6A1_Intron4_1	17
ALDH16A1_Intron1_1	17
PTGR2_Intron3_1	17
SDR39U1_Intron2_2	17
LPGAT1_Intron4_1	17
SDSL_Intron3_1	17
TXNRD1_Intron8_1	17
EZH2_Intron2_1	17
INPP1_Intron2_1	17
DPY30_Intron3_2	17
HVCN1_Intron7_1	17
INPP5K_Intron5_1	17
RNF20_Intron2_1	17
SHMT2_Intron2_1	17
ACE_Intron7_2	17
FKBP3_Intron4_1	17
GYG2_Intron4_2	17
UCP3_Intron2_3	17
PARP1_Intron1_1	17
TDRD9_Intron23_1	17
EPRS_Intron5_1	16
PHF10_Intron8_1	16
NDUFV2_Intron4_1	16
ME2_Intron15_1	16
NT5DC4_Intron10_1	16
GSTZ1_Intron1_1	16
DNMT1_Intron25_1	16
BAZ1B_Intron6_1	16
AHCYL2_Intron1_1	16
PLCB1_Intron4_1	16
MAOB_Intron4_1	16
LBR_Intron3_1	16
TRIM28_Intron15_1	16
MARS_Intron12_1	16
EP300_Intron3_1	16
ATAD2_Intron21_1	16
TALDO1_Intron7_1	16
PHB_Intron5_1	16
P4HB_Intron4_1	16
NDUFV2_Intron2_1	16
EXTL3_Intron3_2	16
DOT1L_Intron4_1	16
INPPL1_Intron7_1	16
ACBD3_Intron5_2	16
ACADSB_Intron8_1	16
DLAT_Intron6_1	16
RCOR1_Intron9_1	16
AKAP8_Intron12_1	16
PMM2_Intron7_1	16
COX15_Intron5_1	16
DNMT1_Intron37_1	16
TFB2M_Intron2_1	16
SAP30_Intron1_2	16
PGM2_Intron2_1	16
IARS2_Intron13_1	16
USP7_Intron13_1	16
WBP2_Intron7_1	16
UMPS_Intron1_1	16
ACAT2_Intron3_2	16
GSTCD_Intron2_1	16
ABAT_Intron12_1	16
PIK3CB_Intron10_1	16
UBR2_Intron10_1	16
PRMT7_Intron16_1	16
NDUFAF5_Intron3_1	16
COQ10A_Intron3_2	16
COQ10A_Intron4_2	16
ACO1_Intron13_1	16
POR_Intron12_1	16
PNPLA6_Intron27_1	16
GALK1_Intron7_2	16
CPS1_Intron1_1	16
MAN2B2_Intron1_1	16
UEVLD_Intron4_1	16
NFS1_Intron3_1	16
NDUFC1_Intron4_1	16
HAGHL_Intron2_1	16
RSAD2_Intron4_1	16
CKM_Intron6_2	16
BCO2_Intron10_1	16
CYP2B6_Intron1_1	16
GALNT9_Intron7_1	16
GPX6_Intron4_1	16
MYOCD_Intron6_1	16
KARS_Intron13_1	15
CAD_Intron9_1	15
FH_Intron1_1	15
HDAC9_Intron7_1	15
HCFC1_Intron22_1	15
ADIPOR2_Intron2_2	15
USP9X_Intron12_1	15
UQCRC2_Intron3_1	15
CRLS1_Intron1_1	15
NOC2L_Intron10_1	15
UBR5_Intron19_1	15
LEO1_Intron9_1	15
MTHFD1L_Intron4_1	15
NOC2L_Intron14_1	15
WDR82_Intron5_1	15
MTHFD1_Intron22_1	15
MTHFD1_Intron25_1	15
PGD_Intron4_1	15
CAD_Intron37_1	15
FBL_Intron4_1	15
AFG3L2_Intron5_1	15
PFKL_Intron10_1	15
SUPT6H_Intron19_1	15
COX7A2L_Intron1_1	15
FKBP5_Intron2_1	15
PGK1_Intron8_1	15
SKP1_Intron5_2	15
EHMT1_Intron25_1	15
ACLY_Intron4_1	15
CREBBP_Intron12_1	15
CREBBP_Intron14_1	15
BRMS1_Intron8_1	15
NDUFS1_Intron3_1	15
PTEN_Intron8_1	15
ETNK1_Intron1_1	15
PAPSS1_Intron1_1	15
PHC1_Intron9_1	15
CUL4B_Intron3_1	15
HIBADH_Intron2_2	15
CHPF2_Intron3_2	15
COQ8A_Intron8_1	15
CA2_Intron5_1	15
AUTS2_Intron2_1	15
AUTS2_Intron4_1	15
ACP2_Intron4_1	15
SATB1_Intron10_1	15
XYLT2_Intron7_1	15
SMAD4_Intron10_2	15
CHID1_Intron3_1	15
HDAC6_Intron28_1	15
ADCY6_Intron20_1	15
ALDH1A3_Intron7_1	15
NCOA1_Intron20_1	15
GATAD2A_Intron3_1	15
GATA3_Intron4_2	15
USP16_Intron14_1	15
EDEM2_Intron7_1	15
PRMT5_Intron6_1	15
MAP3K12_Intron12_2	15
MUTYH_Intron13_1	15
ITPR2_Intron3_1	15
PDE6C_Intron8_1	15
PLA2G4E_Intron9_1	15
PRKAA1_Intron3_3	15
NT5C2_Intron8_1	15
ALDH2_Intron6_1	15
FOLH1_Intron11_1	15
HYAL1_Intron2_1	15
PRDM14_Intron6_1	15
IL4I1_Intron7_1	15
APOB_Intron16_1	15
FTCD_Intron12_1	15
GUCY2C_Intron16_1	15
TBXAS1_Intron12_1	15
HK1_Intron13_1	14
CAD_Intron16_1	14
GANAB_Intron7_1	14
HDAC2_Intron7_2	14
THEM6_Intron1_3	14
PIGX_Intron3_2	14
FOLH1_Intron13_1	14
SREBF2_Intron4_1	14
MTR_Intron7_1	14
DDB1_Intron3_1	14
SFPQ_Intron7_1	14
ATIC_Intron10_1	14
HK2_Intron3_1	14
PLCG1_Intron23_1	14
ACP1_Intron5_2	14
LTA4H_Intron1_1	14
HCFC1_Intron21_1	14
NDUFB9_Intron2_2	14
PYGL_Intron8_1	14
SUPT6H_Intron28_1	14
SKP1_Intron5_1	14
ACLY_Intron17_1	14
ACLY_Intron24_1	14
CREBBP_Intron2_1	14
CAT_Intron12_1	14
FKBP9_Intron9_2	14
DLAT_Intron1_1	14
PCBD1_Intron1_1	14
ALG8_Intron2_1	14
KAT7_Intron5_1	14
ENOPH1_Intron2_2	14
ST6GALNAC6_Intron3_1	14
GLYR1_Intron4_1	14
NIPBL_Intron42_1	14
KDM4B_Intron5_1	14
FUCA1_Intron5_1	14
METTL8_Intron4_2	14
BRCA2_Intron26_1	14
SMNDC1_Intron2_1	14
ELOVL4_Intron5_1	14
COX5A_Intron3_2	14
CTBP1_Intron2_1	14
UMPS_Intron4_2	14
LDB1_Intron10_1	14
NSD2_Intron4_1	14
USP21_Intron8_1	14
ADSL_Intron12_1	14
TARS_Intron4_1	14
CA8_Intron4_1	14
ACOX3_Intron9_1	14
MTHFSD_Intron3_1	14
ING3_Intron3_1	14
GCH1_Intron2_3	14
ITPR3_Intron45_1	14
PCCA_Intron14_1	14
ASNS_Intron8_1	14
ACTL6A_Intron13_1	14
ALKBH6_Intron3_1	14
LMNA_Intron2_1	14
TRMT13_Intron1_1	14
REXO4_Intron4_1	14
RPA2_Intron3_1	14
HOGA1_Intron3_1	14
DGKI_Intron2_1	14
DGKG_Intron14_1	14
PAX7_Intron7_2	14
PKD2L1_Intron12_1	14
FASN_Intron12_1	13
ACLY_Intron2_1	13
MDH1_Intron4_1	13
CTCF_Intron8_1	13
EPRS_Intron22_1	13
CTNNB1_Intron6_1	13
PHGDH_Intron10_1	13
UQCRH_Intron2_1	13
UQCRH_Intron3_2	13
CAD_Intron33_1	13
RPA1_Intron16_1	13
HUWE1_Intron9_1	13
GMPS_Intron1_1	13
USP9X_Intron31_1	13
CTNNB1_Intron11_1	13
ATAD3B_Intron7_1	13
SDHB_Intron4_1	13
RUVBL2_Intron3_1	13
MUT_Intron12_1	13
STAT5B_Intron13_1	13
IP6K1_Intron5_1	13
RIF1_Intron33_1	13
SMS_Intron5_1	13
KDM5A_Intron1_1	13
PMVK_Intron2_1	13
PIR_Intron3_1	13
AKR7A2_Intron2_2	13
SETDB1_Intron4_1	13
CDK9_Intron6_1	13
GLYR1_Intron15_1	13
UCKL1_Intron3_1	13
PWP1_Intron13_1	13
NIPBL_Intron7_1	13
GATA2_Intron4_2	13
MTA3_Intron9_1	13
SFXN5_Intron2_1	13
CRYZ_Intron3_1	13
FLAD1_Intron1_1	13
HLCS_Intron9_1	13
GLS_Intron10_1	13
GLS_Intron14_1	13
MAT2B_Intron6_1	13
NTMT1_Intron2_1	13
PDE8A_Intron21_1	13
MGAT4A_Intron4_1	13
LIPE_Intron4_1	13
SRCAP_Intron18_1	13
DPYSL3_Intron11_1	13
ENOX2_Intron15_1	13
ASNS_Intron13_1	13
ACTL6A_Intron10_1	13
SGPL1_Intron2_2	13
LRTOMT_Intron4_1	13
CDK1_Intron6_1	13
EYA3_Intron2_1	13
PHF20_Intron4_1	13
NT5DC2_Intron10_1	13
UGT3A2_Intron4_2	13
IARS_Intron2_1	13
HR_Intron16_1	13
PRIM2_Intron3_2	13
COX7A2_Intron3_1	13
ALDH2_Intron5_1	13
SV2B_Intron6_1	13
ENO4_Intron8_1	13
ACP7_Intron10_1	13
ABHD12B_Intron11_2	13
MDH1B_Intron2_1	13
ACSL5_Intron13_1	13
GLYATL1_Intron3_2	13
MOV10L1_Intron25_1	13
PIK3CG_Intron10_1	13
ATAD3B_Intron9_1	12
ENTPD3_Intron10_1	12
HUWE1_Intron7_1	12
CHTOP_Intron1_2	12
ECHS1_Intron7_1	12
SMAD4_Intron10_1	12
PLB1_Intron10_1	12
IDH1_Intron4_3	12
COX7C_Intron1_2	12
PLA2G16_Intron1_2	12
ASRGL1_Intron3_1	12
AGXT2_Intron4_1	12
NonTargeting_control49	12
PTGES3_Intron5_1	12
RRM2_Intron1_1	12
RRM2_Intron7_1	12
GANAB_Intron20_1	12
PFAS_Intron23_1	12
HUWE1_Intron66_1	12
SDHA_Intron3_1	12
PLCG1_Intron10_1	12
ADIPOR2_Intron2_1	12
DARS2_Intron4_1	12
KMT2D_Intron49_1	12
TTYH3_Intron3_1	12
SIN3A_Intron8_1	12
ADIPOR1_Intron2_2	12
DOT1L_Intron6_1	12
ELAC2_Intron17_1	12
GPD2_Intron11_1	12
PGK1_Intron4_1	12
PGK1_Intron7_1	12
MUT_Intron3_1	12
IDH3B_Intron1_1	12
NDUFS8_Intron6_1	12
KANSL3_Intron6_1	12
CHPT1_Intron1_1	12
PAXIP1_Intron6_1	12
DLAT_Intron10_1	12
DLAT_Intron12_1	12
DCK_Intron2_1	12
OSBPL11_Intron4_1	12
RRM2B_Intron1_1	12
PKD1_Intron8_1	12
IFI30_Intron1_1	12
CYB5B_Intron2_1	12
UQCRB_Intron3_1	12
CNDP2_Intron9_1	12
ATF7IP_Intron6_1	12
GLA_Intron6_1	12
MYSM1_Intron16_1	12
MAN2C1_Intron10_1	12
SREBF1_Intron7_1	12
CYBA_Intron5_1	12
ACADS_Intron8_1	12
MVK_Intron9_2	12
IDH2_Intron2_1	12
CDO1_Intron4_2	12
VPS29_Intron1_2	12
UGP2_Intron3_1	12
GADL1_Intron14_1	12
ALDH6A1_Intron2_1	12
NT5C3B_Intron2_1	12
DPAGT1_Intron7_2	12
AGL_Intron26_1	12
TARS_Intron10_1	12
HDAC7_Intron8_1	12
ETFA_Intron9_1	12
BRCC3_Intron1_1	12
AMDHD2_Intron6_2	12
ATG5_Intron6_2	12
AUH_Intron7_1	12
CYBB_Intron7_1	12
MAN1B1_Intron1_1	12
ENOX2_Intron10_1	12
ASNS_Intron4_1	12
ABHD11_Intron3_2	12
JADE3_Intron3_1	12
DHRS2_Intron3_1	12
RPA2_Intron1_1	12
PDE2A_Intron14_1	12
ABHD1_Intron1_1	12
DUOX1_Intron13_1	12
EPX_Intron5_2	12
GLYAT_Intron3_1	12
HOGA1_Intron3_2	12
ACPP_Intron5_1	12
GGT5_Intron10_1	12
HNF4A_Intron4_1	12
RAPGEF3_Intron26_1	12
AWAT2_Intron3_3	12
CPT1C_Intron8_1	12
P2RX7_Intron12_1	12
CYP3A4_Intron12_1	12
FABP2_Intron3_1	12
COX8A_Intron1_1	11
ENO1_Intron4_2	11
ISCA2_Intron2_3	11
FMR1_Intron7_1	11
GATAD2A_Intron6_1	11
CARS2_Intron13_1	11
ACOT7_Intron8_2	11
HSD17B4_Intron20_1	11
CYB5B_Intron3_2	11
ECHS1_Intron3_2	11
LDHB_Intron2_1	11
MTHFD1_Intron15_1	11
PYGB_Intron7_1	11
VPS4B_Intron9_2	11
BCKDHA_Intron2_1	11
KARS_Intron10_1	11
CAD_Intron38_1	11
CAD_Intron40_1	11
EP300_Intron18_1	11
ATAD2_Intron27_1	11
PLCG1_Intron20_1	11
TALDO1_Intron7_2	11
PYGB_Intron15_1	11
SUPT6H_Intron8_1	11
TRIP12_Intron32_1	11
YEATS2_Intron3_1	11
COASY_Intron5_1	11
MUT_Intron5_1	11
GPI_Intron12_1	11
RIF1_Intron28_1	11
CDC73_Intron10_1	11
COX11_Intron1_1	11
PIR_Intron8_1	11
PDXK_Intron1_1	11
PKD1_Intron42_1	11
NDUFB2_Intron2_2	11
USP15_Intron17_1	11
PRTFDC1_Intron8_1	11
MAN2A1_Intron11_1	11
PDSS1_Intron8_1	11
NUDT12_Intron6_2	11
PIK3C3_Intron8_1	11
NUDT9_Intron5_1	11
MTR_Intron6_1	11
NAXD_Intron6_1	11
RNF40_Intron9_1	11
KDM2A_Intron10_1	11
POMT2_Intron15_1	11
SGF29_Intron2_2	11
GK5_Intron4_1	11
NIT2_Intron2_2	11
SIRT7_Intron1_1	11
SIRT7_Intron2_1	11
GUSB_Intron6_1	11
DIRC2_Intron5_1	11
AHCYL2_Intron14_1	11
TARS_Intron8_1	11
BAZ2A_Intron12_1	11
ETFA_Intron2_1	11
MAP3K7_Intron3_2	11
MAP3K7_Intron5_2	11
MAP3K7_Intron7_1	11
ATG5_Intron2_2	11
PDK3_Intron9_1	11
NDST2_Intron3_1	11
NQO1_Intron3_2	11
NQO1_Intron5_2	11
STARD13_Intron4_1	11
LMNA_Intron3_1	11
LMNA_Intron9_1	11
APOBEC3B_Intron7_1	11
HDAC9_Intron6_1	11
SMOX_Intron7_1	11
PLCB4_Intron4_1	11
ALDH1A2_Intron3_1	11
STAT5A_Intron14_1	11
NDUFA4L2_Intron4_1	11
CA7_Intron5_1	11
ACSL5_Intron14_1	11
HEPHL1_Intron15_2	11
ALPI_Intron6_1	11
PLA2G4F_Intron9_1	11
OGDH_Intron2_1	10
VPS29_Intron2_2	10
ALDH6A1_Intron3_1	10
UHRF1_Intron3_1	10
MAT2B_Intron1_1	10
NonTargeting_control36	10
COLGALT2_Intron3_1	10
PYCR2_Intron4_1	10
CYP11B2_Intron8_2	10
RPA1_Intron8_1	10
PLIN3_Intron4_1	10
TPCN2_Intron2_1	10
CNGB3_Intron11_1	10
FKBP4_Intron9_1	10
MTHFD1_Intron22_2	10
GOT2_Intron6_1	10
EPRS_Intron28_1	10
ODC1_Intron10_1	10
ODC1_Intron7_1	10
GTF3C4_Intron2_1	10
AKR1B1_Intron8_1	10
ATAD2_Intron14_1	10
NME4_Intron2_2	10
ATRX_Intron3_1	10
RARS_Intron7_1	10
KMT2D_Intron12_1	10
MDH2_Intron8_1	10
OGDH_Intron5_1	10
SETD2_Intron10_1	10
SETD2_Intron16_1	10
TXNDC12_Intron4_3	10
NDUFA8_Intron1_2	10
FAM129B_Intron6_1	10
CREBBP_Intron27_1	10
ACAA2_Intron6_1	10
TRUB1_Intron3_2	10
TK1_Intron4_1	10
PCCB_Intron2_1	10
GLTP_Intron4_2	10
SIN3B_Intron3_1	10
EP400_Intron2_1	10
SAP30_Intron2_1	10
PTGR1_Intron9_1	10
NDUFAF2_Intron3_3	10
IDH3G_Intron3_1	10
FDXR_Intron2_1	10
PHYH_Intron6_1	10
LPIN3_Intron12_1	10
CTBP1_Intron5_1	10
CTBP1_Intron5_2	10
ANKH_Intron3_1	10
ATM_Intron61_1	10
DGKH_Intron1_1	10
MCAT_Intron3_1	10
ST3GAL1_Intron5_2	10
NDUFAF3_Intron2_1	10
NDOR1_Intron12_1	10
KMT2E_Intron21_1	10
ADSL_Intron10_1	10
ADSL_Intron2_1	10
PLCD1_Intron12_1	10
ABHD3_Intron1_2	10
GALE_Intron6_1	10
PDE11A_Intron12_1	10
PFKFB4_Intron8_1	10
PIGN_Intron20_1	10
GSR_Intron8_1	10
ING3_Intron11_1	10
FUK_Intron7_1	10
PIGO_Intron7_1	10
ACACB_Intron24_1	10
ACACB_Intron39_1	10
NRF1_Intron7_1	10
MAP3K7_Intron5_1	10
DPM2_Intron1_1	10
IDH3A_Intron5_1	10
IDH3A_Intron9_1	10
ENPP2_Intron18_1	10
ABHD11_Intron4_2	10
PPA1_Intron2_1	10
PHF8_Intron16_1	10
DUS2_Intron14_1	10
PLCL2_Intron1_2	10
CP_Intron9_2	10
ACOT7_Intron8_1	10
ACSBG1_Intron8_1	10
NDUFS7_Intron5_2	10
ALDH1A2_Intron6_1	10
AQP4_Intron2_1	10
EPHX2_Intron6_1	10
PADI2_Intron7_1	10
PLCE1_Intron20_1	10
PGM5_Intron5_1	10
AKR1D1_Intron2_1	10
ADHFE1_Intron11_1	10
SOAT2_Intron14_1	10
CETP_Intron13_1	10
PLB1_Intron29_1	10
PRMT8_Intron3_1	10
SI_Intron46_1	10
SMYD1_Intron7_1	10
NUDT5_Intron2_1	9
AKR1C2_Intron7_1	9
ETFDH_Intron6_1	9
ACBD4_Intron7_1	9
HADHA_Intron13_1	9
MTHFD1_Intron17_1	9
LIPJ_Intron10_1	9
FDXR_Intron5_1	9
MAN2A2_Intron1_1	9
MEAF6_Intron6_1	9
LPIN1_Intron18_1	9
CNP_Intron3_3	9
NonTargeting_control39	9
ATIC_Intron12_1	9
HK2_Intron4_1	9
CTCF_Intron9_2	9
LYPLA1_Intron8_1	9
OXCT1_Intron16_1	9
USP9X_Intron23_1	9
LTA4H_Intron7_1	9
SELENOI_Intron1_1	9
PFKL_Intron16_1	9
HPRT1_Intron5_1	9
OGDH_Intron8_1	9
TRIP12_Intron16_1	9
SIN3A_Intron14_1	9
HIF1AN_Intron7_1	9
PGK1_Intron7_2	9
PRMT1_Intron2_1	9
CCNB1_Intron5_1	9
NAMPT_Intron3_1	9
MCRS1_Intron4_1	9
HSDL1_Intron5_2	9
DPYSL4_Intron10_1	9
HSD17B4_Intron17_1	9
CUL4B_Intron15_1	9
PHF19_Intron2_3	9
FOXO1_Intron1_1	9
CARM1_Intron4_1	9
YEATS4_Intron1_1	9
ACOT9_Intron11_2	9
AACS_Intron5_1	9
NDUFA5_Intron4_1	9
TTYH2_Intron3_1	9
NAA30_Intron3_2	9
MTR_Intron1_1	9
MTR_Intron5_1	9
MTR_Intron8_1	9
DHODH_Intron1_1	9
SARS2_Intron7_1	9
MANBA_Intron10_1	9
OGT_Intron14_1	9
TRMT2A_Intron5_1	9
KDM1B_Intron10_1	9
LPCAT3_Intron3_1	9
AADAT_Intron12_1	9
EED_Intron2_1	9
PRMT9_Intron1_1	9
GALE_Intron10_1	9
WDR5_Intron2_1	9
TXNDC17_Intron3_3	9
ITPKB_Intron1_1	9
AMPD2_Intron10_1	9
KDSR_Intron6_1	9
PC_Intron17_1	9
SDSL_Intron3_2	9
MFSD11_Intron2_2	9
CDADC1_Intron2_1	9
FPGS_Intron6_1	9
ACO1_Intron16_1	9
ACACB_Intron26_1	9
NRF1_Intron6_1	9
MTRR_Intron5_1	9
PCCA_Intron5_1	9
HCN2_Intron5_1	9
NUDT8_Intron2_3	9
ABHD11_Intron2_1	9
PIGX_Intron6_1	9
PLA2G4B_Intron19_1	9
NME1_Intron3_2	9
OCA2_Intron13_1	9
POFUT1_Intron3_1	9
GFI1_Intron4_2	9
APOBEC3G_Intron7_1	9
PHYKPL_Intron8_1	9
EHD1_Intron4_1	9
IRF4_Intron2_1	9
GUCY2D_Intron3_1	9
DUOX1_Intron32_1	9
CYP2W1_Intron5_1	9
ACSM1_Intron7_1	9
ALPI_Intron6_2	9
ECHDC2_Intron6_1	9
GSTA5_Intron6_1	9
NALCN_Intron25_1	9
PAH_Intron5_1	9
PDE1C_Intron6_1	9
PLA2G4C_Intron14_2	9
TARS_Intron13_1	8
LACTB2_Intron5_1	8
TALDO1_Intron7_3	8
BLVRA_Intron2_3	8
PDHA1_Intron2_1	8
ATAD3A_Intron15_1	8
PFAS_Intron12_1	8
NDUFB11_Intron1_1	8
FKBP4_Intron8_1	8
PRKAA1_Intron3_2	8
DLST_Intron9_1	8
PMM2_Intron1_1	8
HMGA2_Intron1_2	8
INPP4A_Intron19_1	8
PLOD1_Intron14_1	8
STAT5A_Intron13_1	8
FKBP4_Intron6_1	8
EPRS_Intron13_1	8
EPRS_Intron19_1	8
KARS_Intron5_1	8
CAD_Intron21_1	8
ACO2_Intron12_1	8
HUWE1_Intron58_1	8
SDHA_Intron2_1	8
KDM3B_Intron15_1	8
KDM3B_Intron5_1	8
PLCG1_Intron7_1	8
ZMPSTE24_Intron7_1	8
CTR9_Intron9_1	8
SEPHS1_Intron3_1	8
HSD17B10_Intron1_1	8
SUPT6H_Intron27_1	8
GNS_Intron9_1	8
EARS2_Intron8_1	8
SETD1A_Intron18_1	8
FKBP5_Intron4_1	8
IDE_Intron24_1	8
UROD_Intron7_1	8
UQCRC1_Intron3_1	8
HIF1AN_Intron1_1	8
SOAT1_Intron3_1	8
EHMT1_Intron15_1	8
DTYMK_Intron3_2	8
ACLY_Intron20_1	8
UCK2_Intron1_2	8
RARS2_Intron4_1	8
CASP2_Intron2_1	8
POLRMT_Intron3_1	8
PHKA2_Intron5_1	8
ARG2_Intron4_1	8
KDM5A_Intron27_1	8
TADA3_Intron6_1	8
DGKD_Intron21_1	8
DGKD_Intron22_1	8
NARS2_Intron11_1	8
BRD7_Intron12_1	8
MRGBP_Intron2_3	8
CTPS1_Intron8_1	8
PIP5K1C_Intron5_1	8
PAICS_Intron5_1	8
IP6K2_Intron5_2	8
DNMT1_Intron29_1	8
CARM1_Intron3_1	8
MBOAT2_Intron9_1	8
PNPT1_Intron3_1	8
FLCN_Intron6_1	8
HIBADH_Intron5_1	8
PRTFDC1_Intron1_1	8
SHMT1_Intron2_2	8
NTHL1_Intron3_2	8
BCAT2_Intron1_1	8
ATAD3A_Intron9_1	8
ACOX1_Intron6_1	8
KAT8_Intron6_1	8
KAT2B_Intron12_1	8
QTRT1_Intron1_1	8
PIK3C3_Intron14_1	8
USP7_Intron4_1	8
KDM6B_Intron9_1	8
CPE_Intron8_1	8
IMPA1_Intron2_1	8
NUDT9_Intron5_2	8
NADSYN1_Intron19_1	8
ALG6_Intron6_1	8
SYNJ2_Intron10_1	8
EGLN3_Intron1_1	8
THEM6_Intron1_2	8
ETHE1_Intron1_1	8
TPCN1_Intron11_1	8
WDR5_Intron7_1	8
GUSB_Intron1_1	8
ABAT_Intron11_1	8
GMDS_Intron4_1	8
ENPP1_Intron18_1	8
BAZ2A_Intron13_1	8
LIPE_Intron5_1	8
MGAT5B_Intron7_1	8
KDM3A_Intron15_1	8
KDM3A_Intron6_1	8
NSDHL_Intron7_1	8
FUT8_Intron6_2	8
GNAS_Intron11_1	8
GCH1_Intron2_2	8
DGKZ_Intron13_1	8
PCCA_Intron1_1	8
HCN2_Intron4_1	8
NR1H3_Intron8_2	8
DGAT1_Intron2_2	8
ALDH3A2_Intron9_1	8
OBSCN_Intron73_1	8
LRTOMT_Intron4_2	8
ENPP2_Intron16_1	8
TAF10_Intron2_1	8
GPHN_Intron12_1	8
GPHN_Intron15_1	8
FAAH2_Intron8_2	8
EPHX4_Intron1_1	8
MAP3K12_Intron14_2	8
NT5C1A_Intron1_1	8
[truncated: 12,132 more rows]

## Sheet: Supplemental Table S3
# Supplemental Table S3: Result from NGS-based multiplex sgRNA amplicon sequencing on isolated clonal cell lines in arrayed format
# All sgRNA reads detected in each well are shown in the table. In the majority of wells, multiple sgRNAs can be detected due to sample and primer-crosscontamination and not due to truly polyclonal wells or clones expressing two sgRNAs, which would result in wells with two sgRNAs accounting for roughly 50% of all reads in that well.
# Only high confidence wells were annotated. To do so, for each sgRNA and well the percentages of all reads for the respective well (Percent_Reads_Well) and sgRNA (Percent_Reads_sgRNA) wer calculated. Wells were only annotated with a sgRNA (MappedsgRNA) if that sgRNA has more than 10 reads in the respective well OR 3 reads or more when these constitute more than 50% of all reads of that sgRNA in …
# This results in 479 single guide wells and 60 multi guide wells.
Barcode	Well	Plate	sgRNA	Gene	Reads	Reads_sgRNA_Sum	Reads_Well_Sum	Rank	Percent_Reads_Well	Percent_Reads_sgRNA	MappedGene	MappedsgRNA	Mapped_sgRNAs_per_Well	filename of the tiff image, "f01" in the filename refers to the field of view, for each well five fields of view are available f01-f05
A1_F1R1	A1	Plate 1	MUT_Intron3_1	MUT	33	43	46	1	71.7	76.7	MUT	MUT_Intron3_1	1	Plate1_r01c01f01p01-ch1sk1fk1fl1.tiff
A1_F1R1	A1	Plate 1	UQCRC2_Intron13_1	UQCRC2	2	58	46	2	4.3	3.4	MUT	MUT_Intron3_1	1	Plate1_r01c01f01p01-ch1sk1fk1fl1.tiff
A1_F1R1	A1	Plate 1	LARS2_Intron4_1	LARS2	1	98	46	3	2.2	1	MUT	MUT_Intron3_1	1	Plate1_r01c01f01p01-ch1sk1fk1fl1.tiff
A1_F1R1	A1	Plate 1	GATAD2A_Intron7_1	GATAD2A	1	58	46	4	2.2	1.7	MUT	MUT_Intron3_1	1	Plate1_r01c01f01p01-ch1sk1fk1fl1.tiff
A1_F1R1	A1	Plate 1	ASXL1_Intron1_1	ASXL1	1	75	46	>4	2.2	1.3	MUT	MUT_Intron3_1	1	Plate1_r01c01f01p01-ch1sk1fk1fl1.tiff
A1_F1R1	A1	Plate 1	PPA1_Intron3_1	PPA1	1	27	46	>4	2.2	3.7	MUT	MUT_Intron3_1	1	Plate1_r01c01f01p01-ch1sk1fk1fl1.tiff
A1_F1R1	A1	Plate 1	QARS_Intron3_1	QARS	1	36	46	>4	2.2	2.8	MUT	MUT_Intron3_1	1	Plate1_r01c01f01p01-ch1sk1fk1fl1.tiff
A1_F1R1	A1	Plate 1	PSAT1_Intron1_2	PSAT1	1	52	46	>4	2.2	1.9	MUT	MUT_Intron3_1	1	Plate1_r01c01f01p01-ch1sk1fk1fl1.tiff
A1_F1R1	A1	Plate 1	ATAD3A_Intron4_1	ATAD3A	1	185	46	>4	2.2	0.5	MUT	MUT_Intron3_1	1	Plate1_r01c01f01p01-ch1sk1fk1fl1.tiff
A1_F1R1	A1	Plate 1	N6AMT1_Intron3_2	N6AMT1	1	51	46	>4	2.2	2	MUT	MUT_Intron3_1	1	Plate1_r01c01f01p01-ch1sk1fk1fl1.tiff
A1_F1R1	A1	Plate 1	CS_Intron3_1	CS	1	53	46	>4	2.2	1.9	MUT	MUT_Intron3_1	1	Plate1_r01c01f01p01-ch1sk1fk1fl1.tiff
A1_F1R1	A1	Plate 1	HADHA_Intron14_1	HADHA	1	43	46	>4	2.2	2.3	MUT	MUT_Intron3_1	1	Plate1_r01c01f01p01-ch1sk1fk1fl1.tiff
A1_F1R1	A1	Plate 1	ALDH1A3_Intron7_1	ALDH1A3	1	18	46	>4	2.2	5.6	MUT	MUT_Intron3_1	1	Plate1_r01c01f01p01-ch1sk1fk1fl1.tiff
A1_F1R2	A1	Plate 4	IDH3A_Intron2_1	IDH3A	12	59	26	1	46.2	20.3	IDH3A	IDH3A_Intron2_1	1	Plate4_r01c01f01p01-ch1sk1fk1fl1.tiff
A1_F1R2	A1	Plate 4	HADHA_Intron15_1	HADHA	2	59	26	2	7.7	3.4	IDH3A	IDH3A_Intron2_1	1	Plate4_r01c01f01p01-ch1sk1fk1fl1.tiff
A1_F1R2	A1	Plate 4	CTR9_Intron1_1	CTR9	1	180	26	3	3.8	0.6	IDH3A	IDH3A_Intron2_1	1	Plate4_r01c01f01p01-ch1sk1fk1fl1.tiff
A1_F1R2	A1	Plate 4	JADE3_Intron3_1	JADE3	1	14	26	4	3.8	7.1	IDH3A	IDH3A_Intron2_1	1	Plate4_r01c01f01p01-ch1sk1fk1fl1.tiff
A1_F1R2	A1	Plate 4	QARS_Intron18_1	QARS	1	79	26	>4	3.8	1.3	IDH3A	IDH3A_Intron2_1	1	Plate4_r01c01f01p01-ch1sk1fk1fl1.tiff
A1_F1R2	A1	Plate 4	RUVBL1_Intron6_1	RUVBL1	1	10	26	>4	3.8	10	IDH3A	IDH3A_Intron2_1	1	Plate4_r01c01f01p01-ch1sk1fk1fl1.tiff
A1_F1R2	A1	Plate 4	AGPS_Intron13_1	AGPS	1	21	26	>4	3.8	4.8	IDH3A	IDH3A_Intron2_1	1	Plate4_r01c01f01p01-ch1sk1fk1fl1.tiff
A1_F1R2	A1	Plate 4	IDH1_Intron4_2	IDH1	1	104	26	>4	3.8	1	IDH3A	IDH3A_Intron2_1	1	Plate4_r01c01f01p01-ch1sk1fk1fl1.tiff
A1_F1R2	A1	Plate 4	PHF8_Intron21_1	PHF8	1	57	26	>4	3.8	1.8	IDH3A	IDH3A_Intron2_1	1	Plate4_r01c01f01p01-ch1sk1fk1fl1.tiff
A1_F1R2	A1	Plate 4	PLA2G4F_Intron8_1	PLA2G4F	1	28	26	>4	3.8	3.6	IDH3A	IDH3A_Intron2_1	1	Plate4_r01c01f01p01-ch1sk1fk1fl1.tiff
A1_F1R2	A1	Plate 4	SIRT7_Intron1_1	SIRT7	1	10	26	>4	3.8	10	IDH3A	IDH3A_Intron2_1	1	Plate4_r01c01f01p01-ch1sk1fk1fl1.tiff
A1_F1R2	A1	Plate 4	N6AMT1_Intron3_2	N6AMT1	1	51	26	>4	3.8	2	IDH3A	IDH3A_Intron2_1	1	Plate4_r01c01f01p01-ch1sk1fk1fl1.tiff
A1_F1R2	A1	Plate 4	CS_Intron3_1	CS	1	53	26	>4	3.8	1.9	IDH3A	IDH3A_Intron2_1	1	Plate4_r01c01f01p01-ch1sk1fk1fl1.tiff
A1_F1R2	A1	Plate 4	UQCRC2_Intron13_1	UQCRC2	1	58	26	>4	3.8	1.7	IDH3A	IDH3A_Intron2_1	1	Plate4_r01c01f01p01-ch1sk1fk1fl1.tiff
A1_F1R3	A1	Plate 7	CS_Intron6_1	CS	6	190	13	1	46.2	3.2				Plate7_r01c01f01p01-ch1sk1fk1fl1.tiff
A1_F1R3	A1	Plate 7	AGL_Intron26_1	AGL	1	32	13	2	7.7	3.1				Plate7_r01c01f01p01-ch1sk1fk1fl1.tiff
A1_F1R3	A1	Plate 7	UBE2N_Intron1_2	UBE2N	1	57	13	3	7.7	1.8				Plate7_r01c01f01p01-ch1sk1fk1fl1.tiff
A1_F1R3	A1	Plate 7	FASN_Intron22_1	FASN	1	55	13	4	7.7	1.8				Plate7_r01c01f01p01-ch1sk1fk1fl1.tiff
A1_F1R3	A1	Plate 7	BCOR_Intron3_1	BCOR	1	15	13	>4	7.7	6.7				Plate7_r01c01f01p01-ch1sk1fk1fl1.tiff
A1_F1R3	A1	Plate 7	PSAT1_Intron1_2	PSAT1	1	52	13	>4	7.7	1.9				Plate7_r01c01f01p01-ch1sk1fk1fl1.tiff
A1_F1R3	A1	Plate 7	OXA1L_Intron1_1	OXA1L	1	74	13	>4	7.7	1.4				Plate7_r01c01f01p01-ch1sk1fk1fl1.tiff
A1_F1R3	A1	Plate 7	MAT2B_Intron6_1	MAT2B	1	44	13	>4	7.7	2.3				Plate7_r01c01f01p01-ch1sk1fk1fl1.tiff
A1_F2R1	A1	Plate 2	NDUFA10_Intron9_1	NDUFA10	43	50	56	1	76.8	86	NDUFA10	NDUFA10_Intron9_1	1	Plate2_r01c01f01p01-ch1sk1fk1fl1.tiff
A1_F2R1	A1	Plate 2	DOT1L_Intron4_1	DOT1L	2	85	56	2	3.6	2.4	NDUFA10	NDUFA10_Intron9_1	1	Plate2_r01c01f01p01-ch1sk1fk1fl1.tiff
A1_F2R1	A1	Plate 2	RNF8_Intron1_1	RNF8	1	62	56	3	1.8	1.6	NDUFA10	NDUFA10_Intron9_1	1	Plate2_r01c01f01p01-ch1sk1fk1fl1.tiff
A1_F2R1	A1	Plate 2	GSR_Intron4_1	GSR	1	82	56	4	1.8	1.2	NDUFA10	NDUFA10_Intron9_1	1	Plate2_r01c01f01p01-ch1sk1fk1fl1.tiff
A1_F2R1	A1	Plate 2	DPYSL2_Intron7_1	DPYSL2	1	116	56	>4	1.8	0.9	NDUFA10	NDUFA10_Intron9_1	1	Plate2_r01c01f01p01-ch1sk1fk1fl1.tiff
A1_F2R1	A1	Plate 2	DPYSL5_Intron11_1	DPYSL5	1	56	56	>4	1.8	1.8	NDUFA10	NDUFA10_Intron9_1	1	Plate2_r01c01f01p01-ch1sk1fk1fl1.tiff
A1_F2R1	A1	Plate 2	CTR9_Intron1_1	CTR9	1	180	56	>4	1.8	0.6	NDUFA10	NDUFA10_Intron9_1	1	Plate2_r01c01f01p01-ch1sk1fk1fl1.tiff
A1_F2R1	A1	Plate 2	FASN_Intron22_1	FASN	1	55	56	>4	1.8	1.8	NDUFA10	NDUFA10_Intron9_1	1	Plate2_r01c01f01p01-ch1sk1fk1fl1.tiff
A1_F2R1	A1	Plate 2	GAPDH_Intron3_2	GAPDH	1	71	56	>4	1.8	1.4	NDUFA10	NDUFA10_Intron9_1	1	Plate2_r01c01f01p01-ch1sk1fk1fl1.tiff
A1_F2R1	A1	Plate 2	MAOB_Intron4_1	MAOB	1	36	56	>4	1.8	2.8	NDUFA10	NDUFA10_Intron9_1	1	Plate2_r01c01f01p01-ch1sk1fk1fl1.tiff
A1_F2R1	A1	Plate 2	FH_Intron8_1	FH	1	29	56	>4	1.8	3.4	NDUFA10	NDUFA10_Intron9_1	1	Plate2_r01c01f01p01-ch1sk1fk1fl1.tiff
A1_F2R1	A1	Plate 2	TXNDC5_Intron6_1	TXNDC5	1	32	56	>4	1.8	3.1	NDUFA10	NDUFA10_Intron9_1	1	Plate2_r01c01f01p01-ch1sk1fk1fl1.tiff
A1_F2R1	A1	Plate 2	RRM1_Intron17_1	RRM1	1	60	56	>4	1.8	1.7	NDUFA10	NDUFA10_Intron9_1	1	Plate2_r01c01f01p01-ch1sk1fk1fl1.tiff
A1_F2R2	A1	Plate 5	MAOB_Intron4_1	MAOB	19	36	28	1	67.9	52.8	MAOB	MAOB_Intron4_1	1	Plate5_r01c01f01p01-ch1sk1fk1fl1.tiff
A1_F2R2	A1	Plate 5	CYB5R3_Intron2_1	CYB5R3	1	270	28	2	3.6	0.4	MAOB	MAOB_Intron4_1	1	Plate5_r01c01f01p01-ch1sk1fk1fl1.tiff
A1_F2R2	A1	Plate 5	ING3_Intron11_1	ING3	1	47	28	3	3.6	2.1	MAOB	MAOB_Intron4_1	1	Plate5_r01c01f01p01-ch1sk1fk1fl1.tiff
A1_F2R2	A1	Plate 5	SYNJ2_Intron10_1	SYNJ2	1	18	28	4	3.6	5.6	MAOB	MAOB_Intron4_1	1	Plate5_r01c01f01p01-ch1sk1fk1fl1.tiff
A1_F2R2	A1	Plate 5	PHYH_Intron6_1	PHYH	1	13	28	>4	3.6	7.7	MAOB	MAOB_Intron4_1	1	Plate5_r01c01f01p01-ch1sk1fk1fl1.tiff
A1_F2R2	A1	Plate 5	PPAT_Intron9_1	PPAT	1	78	28	>4	3.6	1.3	MAOB	MAOB_Intron4_1	1	Plate5_r01c01f01p01-ch1sk1fk1fl1.tiff
A1_F2R2	A1	Plate 5	PIGK_Intron4_1	PIGK	1	5	28	>4	3.6	20	MAOB	MAOB_Intron4_1	1	Plate5_r01c01f01p01-ch1sk1fk1fl1.tiff
A1_F2R2	A1	Plate 5	HIBCH_Intron2_1	HIBCH	1	22	28	>4	3.6	4.5	MAOB	MAOB_Intron4_1	1	Plate5_r01c01f01p01-ch1sk1fk1fl1.tiff
A1_F2R2	A1	Plate 5	DOT1L_Intron4_1	DOT1L	1	85	28	>4	3.6	1.2	MAOB	MAOB_Intron4_1	1	Plate5_r01c01f01p01-ch1sk1fk1fl1.tiff
A1_F2R2	A1	Plate 5	PLA2G16_Intron1_1	PLA2G16	1	15	28	>4	3.6	6.7	MAOB	MAOB_Intron4_1	1	Plate5_r01c01f01p01-ch1sk1fk1fl1.tiff
A1_F2R3	A1	Plate 8	MAT2B_Intron6_1	MAT2B	23	44	26	1	88.5	52.3	MAT2B	MAT2B_Intron6_1	1	Plate8_r01c01f01p01-ch1sk1fk1fl1.tiff
A1_F2R3	A1	Plate 8	PDHB_Intron1_1	PDHB	1	30	26	2	3.8	3.3	MAT2B	MAT2B_Intron6_1	1	Plate8_r01c01f01p01-ch1sk1fk1fl1.tiff
A1_F2R3	A1	Plate 8	OBSCN_Intron66_1	OBSCN	1	26	26	3	3.8	3.8	MAT2B	MAT2B_Intron6_1	1	Plate8_r01c01f01p01-ch1sk1fk1fl1.tiff
A1_F2R3	A1	Plate 8	PARK7_Intron4_2	PARK7	1	139	26	4	3.8	0.7	MAT2B	MAT2B_Intron6_1	1	Plate8_r01c01f01p01-ch1sk1fk1fl1.tiff
A1_F3R1	A1	Plate 3	CERS2_Intron3_1	CERS2	32	38	37	1	86.5	84.2	CERS2	CERS2_Intron3_1	1	Plate3_r01c01f01p01-ch1sk1fk1fl1.tiff
A1_F3R1	A1	Plate 3	DARS2_Intron9_1	DARS2	1	80	37	2	2.7	1.3	CERS2	CERS2_Intron3_1	1	Plate3_r01c01f01p01-ch1sk1fk1fl1.tiff
A1_F3R1	A1	Plate 3	MTHFD1_Intron22_2	MTHFD1	1	74	37	3	2.7	1.4	CERS2	CERS2_Intron3_1	1	Plate3_r01c01f01p01-ch1sk1fk1fl1.tiff
A1_F3R1	A1	Plate 3	NXN_Intron7_1	NXN	1	85	37	4	2.7	1.2	CERS2	CERS2_Intron3_1	1	Plate3_r01c01f01p01-ch1sk1fk1fl1.tiff
A1_F3R1	A1	Plate 3	CS_Intron6_1	CS	1	190	37	>4	2.7	0.5	CERS2	CERS2_Intron3_1	1	Plate3_r01c01f01p01-ch1sk1fk1fl1.tiff
A1_F3R1	A1	Plate 3	IDH1_Intron4_2	IDH1	1	104	37	>4	2.7	1	CERS2	CERS2_Intron3_1	1	Plate3_r01c01f01p01-ch1sk1fk1fl1.tiff
A1_F3R2	A1	Plate 6	IDE_Intron13_1	IDE	20	94	24	1	83.3	21.3	IDE	IDE_Intron13_1	1	Plate6_r01c01f01p01-ch1sk1fk1fl1.tiff
A1_F3R2	A1	Plate 6	DPYSL2_Intron7_1	DPYSL2	1	116	24	2	4.2	0.9	IDE	IDE_Intron13_1	1	Plate6_r01c01f01p01-ch1sk1fk1fl1.tiff
A1_F3R2	A1	Plate 6	PARK7_Intron3_2	PARK7	1	14	24	3	4.2	7.1	IDE	IDE_Intron13_1	1	Plate6_r01c01f01p01-ch1sk1fk1fl1.tiff
A1_F3R2	A1	Plate 6	GFPT1_Intron13_1	GFPT1	1	29	24	4	4.2	3.4	IDE	IDE_Intron13_1	1	Plate6_r01c01f01p01-ch1sk1fk1fl1.tiff
A1_F3R2	A1	Plate 6	IDH1_Intron4_2	IDH1	1	104	24	>4	4.2	1	IDE	IDE_Intron13_1	1	Plate6_r01c01f01p01-ch1sk1fk1fl1.tiff
A1_F3R3	A1	Plate 9	CERS2_Intron3_1	CERS2	1	38	3	1	33.3	2.6
A1_F3R3	A1	Plate 9	RPA2_Intron3_1	RPA2	1	34	3	2	33.3	2.9
A1_F3R3	A1	Plate 9	ADSL_Intron2_1	ADSL	1	9	3	3	33.3	11.1
A10_F1R1	A10	Plate 1	CYP7A1_Intron2_2	CYP7A1	17	82	54	1	31.5	20.7	CYP7A1;KMT5A	CYP7A1_Intron2_2;KMT5A_Intron2_1	2	Plate1_r01c10f01p01-ch1sk1fk1fl1.tiff
A10_F1R1	A10	Plate 1	KMT5A_Intron2_1	KMT5A	15	141	54	2	27.8	10.6	CYP7A1;KMT5A	CYP7A1_Intron2_2;KMT5A_Intron2_1	2	Plate1_r01c10f01p01-ch1sk1fk1fl1.tiff
A10_F1R1	A10	Plate 1	RNF8_Intron1_1	RNF8	3	62	54	3	5.6	4.8	CYP7A1;KMT5A	CYP7A1_Intron2_2;KMT5A_Intron2_1	2	Plate1_r01c10f01p01-ch1sk1fk1fl1.tiff
A10_F1R1	A10	Plate 1	AKR1C2_Intron5_1	AKR1C2	3	30	54	4	5.6	10	CYP7A1;KMT5A	CYP7A1_Intron2_2;KMT5A_Intron2_1	2	Plate1_r01c10f01p01-ch1sk1fk1fl1.tiff
A10_F1R1	A10	Plate 1	NDUFA10_Intron5_1	NDUFA10	1	26	54	>4	1.9	3.8	CYP7A1;KMT5A	CYP7A1_Intron2_2;KMT5A_Intron2_1	2	Plate1_r01c10f01p01-ch1sk1fk1fl1.tiff
A10_F1R1	A10	Plate 1	JADE3_Intron3_3	JADE3	1	31	54	>4	1.9	3.2	CYP7A1;KMT5A	CYP7A1_Intron2_2;KMT5A_Intron2_1	2	Plate1_r01c10f01p01-ch1sk1fk1fl1.tiff
A10_F1R1	A10	Plate 1	DARS2_Intron9_1	DARS2	1	80	54	>4	1.9	1.3	CYP7A1;KMT5A	CYP7A1_Intron2_2;KMT5A_Intron2_1	2	Plate1_r01c10f01p01-ch1sk1fk1fl1.tiff
A10_F1R1	A10	Plate 1	PDHA1_Intron3_1	PDHA1	1	51	54	>4	1.9	2	CYP7A1;KMT5A	CYP7A1_Intron2_2;KMT5A_Intron2_1	2	Plate1_r01c10f01p01-ch1sk1fk1fl1.tiff
A10_F1R1	A10	Plate 1	PFKP_Intron3_2	PFKP	1	51	54	>4	1.9	2	CYP7A1;KMT5A	CYP7A1_Intron2_2;KMT5A_Intron2_1	2	Plate1_r01c10f01p01-ch1sk1fk1fl1.tiff
A10_F1R1	A10	Plate 1	AHCY_Intron5_1	AHCY	1	1	54	>4	1.9	100	CYP7A1;KMT5A	CYP7A1_Intron2_2;KMT5A_Intron2_1	2	Plate1_r01c10f01p01-ch1sk1fk1fl1.tiff
A10_F1R1	A10	Plate 1	PPA2_Intron3_1	PPA2	1	92	54	>4	1.9	1.1	CYP7A1;KMT5A	CYP7A1_Intron2_2;KMT5A_Intron2_1	2	Plate1_r01c10f01p01-ch1sk1fk1fl1.tiff
A10_F1R1	A10	Plate 1	PPA1_Intron3_1	PPA1	1	27	54	>4	1.9	3.7	CYP7A1;KMT5A	CYP7A1_Intron2_2;KMT5A_Intron2_1	2	Plate1_r01c10f01p01-ch1sk1fk1fl1.tiff
A10_F1R1	A10	Plate 1	NDUFA4_Intron3_2	NDUFA4	1	34	54	>4	1.9	2.9	CYP7A1;KMT5A	CYP7A1_Intron2_2;KMT5A_Intron2_1	2	Plate1_r01c10f01p01-ch1sk1fk1fl1.tiff
A10_F1R1	A10	Plate 1	DPYSL5_Intron11_1	DPYSL5	1	56	54	>4	1.9	1.8	CYP7A1;KMT5A	CYP7A1_Intron2_2;KMT5A_Intron2_1	2	Plate1_r01c10f01p01-ch1sk1fk1fl1.tiff
A10_F1R1	A10	Plate 1	DPYSL2_Intron7_1	DPYSL2	1	116	54	>4	1.9	0.9	CYP7A1;KMT5A	CYP7A1_Intron2_2;KMT5A_Intron2_1	2	Plate1_r01c10f01p01-ch1sk1fk1fl1.tiff
A10_F1R1	A10	Plate 1	WDR82_Intron6_1	WDR82	1	17	54	>4	1.9	5.9	CYP7A1;KMT5A	CYP7A1_Intron2_2;KMT5A_Intron2_1	2	Plate1_r01c10f01p01-ch1sk1fk1fl1.tiff
A10_F1R1	A10	Plate 1	GANAB_Intron21_1	GANAB	1	90	54	>4	1.9	1.1	CYP7A1;KMT5A	CYP7A1_Intron2_2;KMT5A_Intron2_1	2	Plate1_r01c10f01p01-ch1sk1fk1fl1.tiff
A10_F1R1	A10	Plate 1	QARS_Intron3_1	QARS	1	36	54	>4	1.9	2.8	CYP7A1;KMT5A	CYP7A1_Intron2_2;KMT5A_Intron2_1	2	Plate1_r01c10f01p01-ch1sk1fk1fl1.tiff
A10_F1R1	A10	Plate 1	COX6C_Intron2_2	COX6C	1	74	54	>4	1.9	1.4	CYP7A1;KMT5A	CYP7A1_Intron2_2;KMT5A_Intron2_1	2	Plate1_r01c10f01p01-ch1sk1fk1fl1.tiff
A10_F1R1	A10	Plate 1	SET_Intron6_1	SET	1	39	54	>4	1.9	2.6	CYP7A1;KMT5A	CYP7A1_Intron2_2;KMT5A_Intron2_1	2	Plate1_r01c10f01p01-ch1sk1fk1fl1.tiff
A10_F1R2	A10	Plate 4	ACLY_Intron10_1	ACLY	2	56	11	1	18.2	3.6				Plate4_r01c10f01p01-ch1sk1fk1fl1.tiff
A10_F1R2	A10	Plate 4	KMT5A_Intron2_1	KMT5A	1	141	11	2	9.1	0.7				Plate4_r01c10f01p01-ch1sk1fk1fl1.tiff
A10_F1R2	A10	Plate 4	DPYSL2_Intron7_1	DPYSL2	1	116	11	3	9.1	0.9				Plate4_r01c10f01p01-ch1sk1fk1fl1.tiff
A10_F1R2	A10	Plate 4	GFPT1_Intron13_1	GFPT1	1	29	11	4	9.1	3.4				Plate4_r01c10f01p01-ch1sk1fk1fl1.tiff
A10_F1R2	A10	Plate 4	NSDHL_Intron2_1	NSDHL	1	5	11	>4	9.1	20				Plate4_r01c10f01p01-ch1sk1fk1fl1.tiff
A10_F1R2	A10	Plate 4	HCFC1_Intron14_1	HCFC1	1	1	11	>4	9.1	100				Plate4_r01c10f01p01-ch1sk1fk1fl1.tiff
A10_F1R2	A10	Plate 4	PARK7_Intron4_2	PARK7	1	139	11	>4	9.1	0.7				Plate4_r01c10f01p01-ch1sk1fk1fl1.tiff
A10_F1R2	A10	Plate 4	USP9X_Intron25_1	USP9X	1	1	11	>4	9.1	100				Plate4_r01c10f01p01-ch1sk1fk1fl1.tiff
A10_F1R2	A10	Plate 4	NME7_Intron9_1	NME7	1	1	11	>4	9.1	100				Plate4_r01c10f01p01-ch1sk1fk1fl1.tiff
A10_F1R2	A10	Plate 4	SIRT1_Intron4_2	SIRT1	1	5	11	>4	9.1	20				Plate4_r01c10f01p01-ch1sk1fk1fl1.tiff
A10_F1R3	A10	Plate 7	SMNDC1_Intron2_1	SMNDC1	5	7	15	1	33.3	71.4				Plate7_r01c10f01p01-ch1sk1fk1fl1.tiff
A10_F1R3	A10	Plate 7	NXN_Intron7_1	NXN	2	85	15	2	13.3	2.4				Plate7_r01c10f01p01-ch1sk1fk1fl1.tiff
A10_F1R3	A10	Plate 7	MTHFD1_Intron22_2	MTHFD1	2	74	15	3	13.3	2.7				Plate7_r01c10f01p01-ch1sk1fk1fl1.tiff
A10_F1R3	A10	Plate 7	ACLY_Intron10_1	ACLY	1	56	15	4	6.7	1.8				Plate7_r01c10f01p01-ch1sk1fk1fl1.tiff
A10_F1R3	A10	Plate 7	OXCT1_Intron1_1	OXCT1	1	34	15	>4	6.7	2.9				Plate7_r01c10f01p01-ch1sk1fk1fl1.tiff
A10_F1R3	A10	Plate 7	LMF1_Intron6_1	LMF1	1	39	15	>4	6.7	2.6				Plate7_r01c10f01p01-ch1sk1fk1fl1.tiff
A10_F1R3	A10	Plate 7	RLF_Intron7_1	RLF	1	43	15	>4	6.7	2.3				Plate7_r01c10f01p01-ch1sk1fk1fl1.tiff
A10_F1R3	A10	Plate 7	PSAT1_Intron1_2	PSAT1	1	52	15	>4	6.7	1.9				Plate7_r01c10f01p01-ch1sk1fk1fl1.tiff
A10_F1R3	A10	Plate 7	SUCLA2_Intron5_1	SUCLA2	1	66	15	>4	6.7	1.5				Plate7_r01c10f01p01-ch1sk1fk1fl1.tiff
A10_F2R1	A10	Plate 2	GSR_Intron4_1	GSR	47	82	55	1	85.5	57.3	GSR	GSR_Intron4_1	1	Plate2_r01c10f01p01-ch1sk1fk1fl1.tiff
A10_F2R1	A10	Plate 2	LARS2_Intron4_1	LARS2	1	98	55	2	1.8	1	GSR	GSR_Intron4_1	1	Plate2_r01c10f01p01-ch1sk1fk1fl1.tiff
A10_F2R1	A10	Plate 2	PCGF6_Intron1_1	PCGF6	1	56	55	3	1.8	1.8	GSR	GSR_Intron4_1	1	Plate2_r01c10f01p01-ch1sk1fk1fl1.tiff
A10_F2R1	A10	Plate 2	ASXL1_Intron1_1	ASXL1	1	75	55	4	1.8	1.3	GSR	GSR_Intron4_1	1	Plate2_r01c10f01p01-ch1sk1fk1fl1.tiff
A10_F2R1	A10	Plate 2	DPYSL2_Intron7_1	DPYSL2	1	116	55	>4	1.8	0.9	GSR	GSR_Intron4_1	1	Plate2_r01c10f01p01-ch1sk1fk1fl1.tiff
A10_F2R1	A10	Plate 2	COX7A2_Intron2_1	COX7A2	1	31	55	>4	1.8	3.2	GSR	GSR_Intron4_1	1	Plate2_r01c10f01p01-ch1sk1fk1fl1.tiff
A10_F2R1	A10	Plate 2	NSUN2_Intron4_1	NSUN2	1	65	55	>4	1.8	1.5	GSR	GSR_Intron4_1	1	Plate2_r01c10f01p01-ch1sk1fk1fl1.tiff
A10_F2R1	A10	Plate 2	MBOAT2_Intron9_1	MBOAT2	1	49	55	>4	1.8	2	GSR	GSR_Intron4_1	1	Plate2_r01c10f01p01-ch1sk1fk1fl1.tiff
A10_F2R1	A10	Plate 2	PDE9A_Intron16_1	PDE9A	1	42	55	>4	1.8	2.4	GSR	GSR_Intron4_1	1	Plate2_r01c10f01p01-ch1sk1fk1fl1.tiff
A10_F2R2	A10	Plate 5	COX7A2_Intron2_1	COX7A2	22	31	27	1	81.5	71	COX7A2	COX7A2_Intron2_1	1	Plate5_r01c10f01p01-ch1sk1fk1fl1.tiff
A10_F2R2	A10	Plate 5	ACAT1_Intron5_1	ACAT1	1	19	27	2	3.7	5.3	COX7A2	COX7A2_Intron2_1	1	Plate5_r01c10f01p01-ch1sk1fk1fl1.tiff
A10_F2R2	A10	Plate 5	ATAD3A_Intron4_1	ATAD3A	1	185	27	3	3.7	0.5	COX7A2	COX7A2_Intron2_1	1	Plate5_r01c10f01p01-ch1sk1fk1fl1.tiff
A10_F2R2	A10	Plate 5	FN3K_Intron4_1	FN3K	1	42	27	4	3.7	2.4	COX7A2	COX7A2_Intron2_1	1	Plate5_r01c10f01p01-ch1sk1fk1fl1.tiff
A10_F2R2	A10	Plate 5	HADHA_Intron10_1	HADHA	1	42	27	>4	3.7	2.4	COX7A2	COX7A2_Intron2_1	1	Plate5_r01c10f01p01-ch1sk1fk1fl1.tiff
A10_F2R2	A10	Plate 5	MAP3K12_Intron14_2	MAP3K12	1	27	27	>4	3.7	3.7	COX7A2	COX7A2_Intron2_1	1	Plate5_r01c10f01p01-ch1sk1fk1fl1.tiff
A10_F3R1	A10	Plate 3	CS_Intron6_1	CS	35	190	56	1	62.5	18.4	CS	CS_Intron6_1	1	Plate3_r01c10f01p01-ch1sk1fk1fl1.tiff
A10_F3R1	A10	Plate 3	CTNNB1_Intron4_1	CTNNB1	9	70	56	2	16.1	12.9	CS	CS_Intron6_1	1	Plate3_r01c10f01p01-ch1sk1fk1fl1.tiff
A10_F3R1	A10	Plate 3	SET_Intron6_1	SET	4	39	56	3	7.1	10.3	CS	CS_Intron6_1	1	Plate3_r01c10f01p01-ch1sk1fk1fl1.tiff
A10_F3R1	A10	Plate 3	PPA1_Intron3_1	PPA1	1	27	56	4	1.8	3.7	CS	CS_Intron6_1	1	Plate3_r01c10f01p01-ch1sk1fk1fl1.tiff
A10_F3R1	A10	Plate 3	AKR1C2_Intron5_1	AKR1C2	1	30	56	>4	1.8	3.3	CS	CS_Intron6_1	1	Plate3_r01c10f01p01-ch1sk1fk1fl1.tiff
A10_F3R1	A10	Plate 3	GMPS_Intron10_1	GMPS	1	21	56	>4	1.8	4.8	CS	CS_Intron6_1	1	Plate3_r01c10f01p01-ch1sk1fk1fl1.tiff
A10_F3R1	A10	Plate 3	NDUFB11_Intron1_2	NDUFB11	1	7	56	>4	1.8	14.3	CS	CS_Intron6_1	1	Plate3_r01c10f01p01-ch1sk1fk1fl1.tiff
A10_F3R1	A10	Plate 3	PRIM1_Intron5_1	PRIM1	1	62	56	>4	1.8	1.6	CS	CS_Intron6_1	1	Plate3_r01c10f01p01-ch1sk1fk1fl1.tiff
A10_F3R1	A10	Plate 3	CA4_Intron5_1	CA4	1	33	56	>4	1.8	3	CS	CS_Intron6_1	1	Plate3_r01c10f01p01-ch1sk1fk1fl1.tiff
A10_F3R1	A10	Plate 3	GLYR1_Intron12_1	GLYR1	1	35	56	>4	1.8	2.9	CS	CS_Intron6_1	1	Plate3_r01c10f01p01-ch1sk1fk1fl1.tiff
A10_F3R1	A10	Plate 3	ATAD3B_Intron7_1	ATAD3B	1	31	56	>4	1.8	3.2	CS	CS_Intron6_1	1	Plate3_r01c10f01p01-ch1sk1fk1fl1.tiff
A10_F3R2	A10	Plate 6	LTA4H_Intron16_1	LTA4H	8	13	28	1	28.6	61.5				Plate6_r01c10f01p01-ch1sk1fk1fl1.tiff
A10_F3R2	A10	Plate 6	RUVBL1_Intron6_1	RUVBL1	6	10	28	2	21.4	60				Plate6_r01c10f01p01-ch1sk1fk1fl1.tiff
A10_F3R2	A10	Plate 6	HSD17B4_Intron19_1	HSD17B4	4	5	28	3	14.3	80				Plate6_r01c10f01p01-ch1sk1fk1fl1.tiff
A10_F3R2	A10	Plate 6	NDUFB11_Intron1_2	NDUFB11	4	7	28	4	14.3	57.1				Plate6_r01c10f01p01-ch1sk1fk1fl1.tiff
A10_F3R2	A10	Plate 6	RRM1_Intron12_1	RRM1	1	8	28	>4	3.6	12.5				Plate6_r01c10f01p01-ch1sk1fk1fl1.tiff
A10_F3R2	A10	Plate 6	SUPT6H_Intron28_1	SUPT6H	1	25	28	>4	3.6	4				Plate6_r01c10f01p01-ch1sk1fk1fl1.tiff
A10_F3R2	A10	Plate 6	CPT1B_Intron14_1	CPT1B	1	26	28	>4	3.6	3.8				Plate6_r01c10f01p01-ch1sk1fk1fl1.tiff
A10_F3R2	A10	Plate 6	PUS7_Intron11_2	PUS7	1	9	28	>4	3.6	11.1				Plate6_r01c10f01p01-ch1sk1fk1fl1.tiff
A10_F3R2	A10	Plate 6	NDUFA8_Intron1_2	NDUFA8	1	39	28	>4	3.6	2.6				Plate6_r01c10f01p01-ch1sk1fk1fl1.tiff
A10_F3R2	A10	Plate 6	RTN4IP1_Intron3_1	RTN4IP1	1	20	28	>4	3.6	5				Plate6_r01c10f01p01-ch1sk1fk1fl1.tiff
A10_F3R3	A10	Plate 9	PUS7_Intron11_2	PUS7	1	9	2	1	50	11.1
A10_F3R3	A10	Plate 9	PUS1_Intron2_2	PUS1	1	23	2	2	50	4.3
A11_F1R1	A11	Plate 1	ASXL1_Intron1_1	ASXL1	16	75	42	1	38.1	21.3	ASXL1;GALNT6	ASXL1_Intron1_1;GALNT6_Intron7_1	2	Plate1_r01c11f01p01-ch1sk1fk1fl1.tiff
A11_F1R1	A11	Plate 1	GALNT6_Intron7_1	GALNT6	13	78	42	2	31	16.7	ASXL1;GALNT6	ASXL1_Intron1_1;GALNT6_Intron7_1	2	Plate1_r01c11f01p01-ch1sk1fk1fl1.tiff
A11_F1R1	A11	Plate 1	LARS2_Intron4_1	LARS2	1	98	42	3	2.4	1	ASXL1;GALNT6	ASXL1_Intron1_1;GALNT6_Intron7_1	2	Plate1_r01c11f01p01-ch1sk1fk1fl1.tiff
A11_F1R1	A11	Plate 1	GATAD2A_Intron7_1	GATAD2A	1	58	42	4	2.4	1.7	ASXL1;GALNT6	ASXL1_Intron1_1;GALNT6_Intron7_1	2	Plate1_r01c11f01p01-ch1sk1fk1fl1.tiff
A11_F1R1	A11	Plate 1	CUL4B_Intron20_1	CUL4B	1	94	42	>4	2.4	1.1	ASXL1;GALNT6	ASXL1_Intron1_1;GALNT6_Intron7_1	2	Plate1_r01c11f01p01-ch1sk1fk1fl1.tiff
A11_F1R1	A11	Plate 1	PRIM1_Intron5_1	PRIM1	1	62	42	>4	2.4	1.6	ASXL1;GALNT6	ASXL1_Intron1_1;GALNT6_Intron7_1	2	Plate1_r01c11f01p01-ch1sk1fk1fl1.tiff
A11_F1R1	A11	Plate 1	OAT_Intron8_1	OAT	1	11	42	>4	2.4	9.1	ASXL1;GALNT6	ASXL1_Intron1_1;GALNT6_Intron7_1	2	Plate1_r01c11f01p01-ch1sk1fk1fl1.tiff
A11_F1R1	A11	Plate 1	ACLY_Intron7_1	ACLY	1	68	42	>4	2.4	1.5	ASXL1;GALNT6	ASXL1_Intron1_1;GALNT6_Intron7_1	2	Plate1_r01c11f01p01-ch1sk1fk1fl1.tiff
A11_F1R1	A11	Plate 1	ECHS1_Intron7_2	ECHS1	1	27	42	>4	2.4	3.7	ASXL1;GALNT6	ASXL1_Intron1_1;GALNT6_Intron7_1	2	Plate1_r01c11f01p01-ch1sk1fk1fl1.tiff
A11_F1R1	A11	Plate 1	FMR1_Intron12_1	FMR1	1	112	42	>4	2.4	0.9	ASXL1;GALNT6	ASXL1_Intron1_1;GALNT6_Intron7_1	2	Plate1_r01c11f01p01-ch1sk1fk1fl1.tiff
A11_F1R1	A11	Plate 1	CS_Intron10_1	CS	1	66	42	>4	2.4	1.5	ASXL1;GALNT6	ASXL1_Intron1_1;GALNT6_Intron7_1	2	Plate1_r01c11f01p01-ch1sk1fk1fl1.tiff
A11_F1R1	A11	Plate 1	PANK3_Intron2_1	PANK3	1	47	42	>4	2.4	2.1	ASXL1;GALNT6	ASXL1_Intron1_1;GALNT6_Intron7_1	2	Plate1_r01c11f01p01-ch1sk1fk1fl1.tiff
A11_F1R1	A11	Plate 1	SOD1_Intron1_1	SOD1	1	18	42	>4	2.4	5.6	ASXL1;GALNT6	ASXL1_Intron1_1;GALNT6_Intron7_1	2	Plate1_r01c11f01p01-ch1sk1fk1fl1.tiff
A11_F1R1	A11	Plate 1	HADHA_Intron5_1	HADHA	1	38	42	>4	2.4	2.6	ASXL1;GALNT6	ASXL1_Intron1_1;GALNT6_Intron7_1	2	Plate1_r01c11f01p01-ch1sk1fk1fl1.tiff
A11_F1R1	A11	Plate 1	PARK7_Intron4_2	PARK7	1	139	42	>4	2.4	0.7	ASXL1;GALNT6	ASXL1_Intron1_1;GALNT6_Intron7_1	2	Plate1_r01c11f01p01-ch1sk1fk1fl1.tiff
A11_F1R2	A11	Plate 4	ABHD11_Intron3_2	ABHD11	17	21	24	1	70.8	81	ABHD11	ABHD11_Intron3_2	1	Plate4_r01c11f01p01-ch1sk1fk1fl1.tiff
A11_F1R2	A11	Plate 4	AMD1_Intron6_1	AMD1	2	10	24	2	8.3	20	ABHD11	ABHD11_Intron3_2	1	Plate4_r01c11f01p01-ch1sk1fk1fl1.tiff
A11_F1R2	A11	Plate 4	COX6C_Intron2_2	COX6C	1	74	24	3	4.2	1.4	ABHD11	ABHD11_Intron3_2	1	Plate4_r01c11f01p01-ch1sk1fk1fl1.tiff
A11_F1R2	A11	Plate 4	AQP1_Intron2_1	AQP1	1	30	24	4	4.2	3.3	ABHD11	ABHD11_Intron3_2	1	Plate4_r01c11f01p01-ch1sk1fk1fl1.tiff
A11_F1R2	A11	Plate 4	PFKP_Intron3_1	PFKP	1	20	24	>4	4.2	5	ABHD11	ABHD11_Intron3_2	1	Plate4_r01c11f01p01-ch1sk1fk1fl1.tiff
A11_F1R2	A11	Plate 4	JADE3_Intron3_1	JADE3	1	14	24	>4	4.2	7.1	ABHD11	ABHD11_Intron3_2	1	Plate4_r01c11f01p01-ch1sk1fk1fl1.tiff
A11_F1R2	A11	Plate 4	PHF10_Intron6_1	PHF10	1	35	24	>4	4.2	2.9	ABHD11	ABHD11_Intron3_2	1	Plate4_r01c11f01p01-ch1sk1fk1fl1.tiff
A11_F1R3	A11	Plate 7	AGL_Intron26_1	AGL	21	32	26	1	80.8	65.6	AGL	AGL_Intron26_1	1	Plate7_r01c11f01p01-ch1sk1fk1fl1.tiff
A11_F1R3	A11	Plate 7	EHMT1_Intron25_1	EHMT1	1	34	26	2	3.8	2.9	AGL	AGL_Intron26_1	1	Plate7_r01c11f01p01-ch1sk1fk1fl1.tiff
A11_F1R3	A11	Plate 7	POFUT1_Intron3_2	POFUT1	1	35	26	3	3.8	2.9	AGL	AGL_Intron26_1	1	Plate7_r01c11f01p01-ch1sk1fk1fl1.tiff
A11_F1R3	A11	Plate 7	TK1_Intron1_1	TK1	1	15	26	4	3.8	6.7	AGL	AGL_Intron26_1	1	Plate7_r01c11f01p01-ch1sk1fk1fl1.tiff
A11_F1R3	A11	Plate 7	ECHS1_Intron7_2	ECHS1	1	27	26	>4	3.8	3.7	AGL	AGL_Intron26_1	1	Plate7_r01c11f01p01-ch1sk1fk1fl1.tiff
A11_F1R3	A11	Plate 7	FMR1_Intron12_1	FMR1	1	112	26	>4	3.8	0.9	AGL	AGL_Intron26_1	1	Plate7_r01c11f01p01-ch1sk1fk1fl1.tiff
A11_F2R1	A11	Plate 2	CS_Intron10_1	CS	18	66	26	1	69.2	27.3	CS	CS_Intron10_1	1	Plate2_r01c11f01p01-ch1sk1fk1fl1.tiff
A11_F2R1	A11	Plate 2	QARS_Intron3_1	QARS	1	36	26	2	3.8	2.8	CS	CS_Intron10_1	1	Plate2_r01c11f01p01-ch1sk1fk1fl1.tiff
A11_F2R1	A11	Plate 2	CTR9_Intron1_1	CTR9	1	180	26	3	3.8	0.6	CS	CS_Intron10_1	1	Plate2_r01c11f01p01-ch1sk1fk1fl1.tiff
A11_F2R1	A11	Plate 2	GSS_Intron2_1	GSS	1	47	26	4	3.8	2.1	CS	CS_Intron10_1	1	Plate2_r01c11f01p01-ch1sk1fk1fl1.tiff
A11_F2R1	A11	Plate 2	MARS_Intron12_1	MARS	1	36	26	>4	3.8	2.8	CS	CS_Intron10_1	1	Plate2_r01c11f01p01-ch1sk1fk1fl1.tiff
A11_F2R1	A11	Plate 2	PDE9A_Intron16_1	PDE9A	1	42	26	>4	3.8	2.4	CS	CS_Intron10_1	1	Plate2_r01c11f01p01-ch1sk1fk1fl1.tiff
A11_F2R1	A11	Plate 2	CUL4B_Intron20_1	CUL4B	1	94	26	>4	3.8	1.1	CS	CS_Intron10_1	1	Plate2_r01c11f01p01-ch1sk1fk1fl1.tiff
A11_F2R1	A11	Plate 2	RTF1_Intron2_1	RTF1	1	45	26	>4	3.8	2.2	CS	CS_Intron10_1	1	Plate2_r01c11f01p01-ch1sk1fk1fl1.tiff
A11_F2R1	A11	Plate 2	SOD1_Intron1_1	SOD1	1	18	26	>4	3.8	5.6	CS	CS_Intron10_1	1	Plate2_r01c11f01p01-ch1sk1fk1fl1.tiff
A11_F2R2	A11	Plate 5	NSDHL_Intron2_1	NSDHL	2	5	5	1	40	40				Plate5_r01c11f01p01-ch1sk1fk1fl1.tiff
A11_F2R2	A11	Plate 5	SEPHS1_Intron6_1	SEPHS1	1	84	5	2	20	1.2				Plate5_r01c11f01p01-ch1sk1fk1fl1.tiff
A11_F2R2	A11	Plate 5	SDHA_Intron14_1	SDHA	1	56	5	3	20	1.8				Plate5_r01c11f01p01-ch1sk1fk1fl1.tiff
A11_F2R2	A11	Plate 5	RTF1_Intron2_1	RTF1	1	45	5	4	20	2.2				Plate5_r01c11f01p01-ch1sk1fk1fl1.tiff
A11_F2R3	A11	Plate 8	BCOR_Intron3_1	BCOR	1	15	1	1	100	6.7
A11_F3R1	A11	Plate 3	NAT10_Intron7_1	NAT10	23	27	56	1	41.1	85.2	NAT10;NDUFA10	NAT10_Intron7_1;NDUFA10_Intron5_1	2	Plate3_r01c11f01p01-ch1sk1fk1fl1.tiff
A11_F3R1	A11	Plate 3	NDUFA10_Intron5_1	NDUFA10	22	26	56	2	39.3	84.6	NAT10;NDUFA10	NAT10_Intron7_1;NDUFA10_Intron5_1	2	Plate3_r01c11f01p01-ch1sk1fk1fl1.tiff
A11_F3R1	A11	Plate 3	GARS_Intron6_1	GARS	2	20	56	3	3.6	10	NAT10;NDUFA10	NAT10_Intron7_1;NDUFA10_Intron5_1	2	Plate3_r01c11f01p01-ch1sk1fk1fl1.tiff
A11_F3R1	A11	Plate 3	EPHX4_Intron1_1	EPHX4	2	43	56	4	3.6	4.7	NAT10;NDUFA10	NAT10_Intron7_1;NDUFA10_Intron5_1	2	Plate3_r01c11f01p01-ch1sk1fk1fl1.tiff
A11_F3R1	A11	Plate 3	DPYSL5_Intron11_1	DPYSL5	1	56	56	>4	1.8	1.8	NAT10;NDUFA10	NAT10_Intron7_1;NDUFA10_Intron5_1	2	Plate3_r01c11f01p01-ch1sk1fk1fl1.tiff
A11_F3R1	A11	Plate 3	FASN_Intron22_1	FASN	1	55	56	>4	1.8	1.8	NAT10;NDUFA10	NAT10_Intron7_1;NDUFA10_Intron5_1	2	Plate3_r01c11f01p01-ch1sk1fk1fl1.tiff
A11_F3R1	A11	Plate 3	SREBF1_Intron7_1	SREBF1	1	15	56	>4	1.8	6.7	NAT10;NDUFA10	NAT10_Intron7_1;NDUFA10_Intron5_1	2	Plate3_r01c11f01p01-ch1sk1fk1fl1.tiff
A11_F3R1	A11	Plate 3	NDUFS6_Intron2_2	NDUFS6	1	40	56	>4	1.8	2.5	NAT10;NDUFA10	NAT10_Intron7_1;NDUFA10_Intron5_1	2	Plate3_r01c11f01p01-ch1sk1fk1fl1.tiff
A11_F3R1	A11	Plate 3	PRPS1_Intron2_2	PRPS1	1	139	56	>4	1.8	0.7	NAT10;NDUFA10	NAT10_Intron7_1;NDUFA10_Intron5_1	2	Plate3_r01c11f01p01-ch1sk1fk1fl1.tiff
A11_F3R1	A11	Plate 3	GMPS_Intron10_1	GMPS	1	21	56	>4	1.8	4.8	NAT10;NDUFA10	NAT10_Intron7_1;NDUFA10_Intron5_1	2	Plate3_r01c11f01p01-ch1sk1fk1fl1.tiff
A11_F3R1	A11	Plate 3	PDE9A_Intron16_1	PDE9A	1	42	56	>4	1.8	2.4	NAT10;NDUFA10	NAT10_Intron7_1;NDUFA10_Intron5_1	2	Plate3_r01c11f01p01-ch1sk1fk1fl1.tiff
A11_F3R2	A11	Plate 6	COX7A2_Intron2_1	COX7A2	1	31	10	1	10	3.2				Plate6_r01c11f01p01-ch1sk1fk1fl1.tiff
A11_F3R2	A11	Plate 6	FASN_Intron40_1	FASN	1	1	10	2	10	100				Plate6_r01c11f01p01-ch1sk1fk1fl1.tiff
A11_F3R2	A11	Plate 6	CS_Intron5_1	CS	1	1	10	3	10	100				Plate6_r01c11f01p01-ch1sk1fk1fl1.tiff
A11_F3R2	A11	Plate 6	ST8SIA1_Intron2_3	ST8SIA1	1	11	10	4	10	9.1				Plate6_r01c11f01p01-ch1sk1fk1fl1.tiff
A11_F3R2	A11	Plate 6	NDUFS6_Intron3_1	NDUFS6	1	43	10	>4	10	2.3				Plate6_r01c11f01p01-ch1sk1fk1fl1.tiff
A11_F3R2	A11	Plate 6	RUVBL1_Intron4_1	RUVBL1	1	1	10	>4	10	100				Plate6_r01c11f01p01-ch1sk1fk1fl1.tiff
A11_F3R2	A11	Plate 6	CNDP2_Intron3_1	CNDP2	1	2	10	>4	10	50				Plate6_r01c11f01p01-ch1sk1fk1fl1.tiff
A11_F3R2	A11	Plate 6	PRPS1_Intron2_2	PRPS1	1	139	10	>4	10	0.7				Plate6_r01c11f01p01-ch1sk1fk1fl1.tiff
A11_F3R2	A11	Plate 6	PGM2_Intron1_1	PGM2	1	1	10	>4	10	100				Plate6_r01c11f01p01-ch1sk1fk1fl1.tiff
A11_F3R2	A11	Plate 6	QARS_Intron18_1	QARS	1	79	10	>4	10	1.3				Plate6_r01c11f01p01-ch1sk1fk1fl1.tiff
A11_F3R3	A11	Plate 9	EPHX2_Intron6_1	EPHX2	1	25	1	1	100	4
A12_F1R1	A12	Plate 1	QARS_Intron3_1	QARS	29	36	33	1	87.9	80.6	QARS	QARS_Intron3_1	1	Plate1_r01c12f01p01-ch1sk1fk1fl1.tiff
A12_F1R1	A12	Plate 1	LTA4H_Intron16_1	LTA4H	1	13	33	2	3	7.7	QARS	QARS_Intron3_1	1	Plate1_r01c12f01p01-ch1sk1fk1fl1.tiff
A12_F1R1	A12	Plate 1	PLCB1_Intron2_1	PLCB1	1	42	33	3	3	2.4	QARS	QARS_Intron3_1	1	Plate1_r01c12f01p01-ch1sk1fk1fl1.tiff
A12_F1R1	A12	Plate 1	COQ10A_Intron3_1	COQ10A	1	50	33	4	3	2	QARS	QARS_Intron3_1	1	Plate1_r01c12f01p01-ch1sk1fk1fl1.tiff
A12_F1R1	A12	Plate 1	METTL17_Intron12_1	METTL17	1	1	33	>4	3	100	QARS	QARS_Intron3_1	1	Plate1_r01c12f01p01-ch1sk1fk1fl1.tiff
A12_F1R2	A12	Plate 4	PPA1_Intron3_1	PPA1	1	27	4	1	25	3.7				Plate4_r01c12f01p01-ch1sk1fk1fl1.tiff
A12_F1R2	A12	Plate 4	SUPT6H_Intron28_1	SUPT6H	1	25	4	2	25	4				Plate4_r01c12f01p01-ch1sk1fk1fl1.tiff
A12_F1R2	A12	Plate 4	HSD17B4_Intron19_1	HSD17B4	1	5	4	3	25	20				Plate4_r01c12f01p01-ch1sk1fk1fl1.tiff
A12_F1R2	A12	Plate 4	PARK7_Intron4_2	PARK7	1	139	4	4	25	0.7				Plate4_r01c12f01p01-ch1sk1fk1fl1.tiff
A12_F1R3	A12	Plate 7	PSAT1_Intron1_2	PSAT1	1	52	3	1	33.3	1.9				Plate7_r01c12f01p01-ch1sk1fk1fl1.tiff
A12_F1R3	A12	Plate 7	MAT2B_Intron6_1	MAT2B	1	44	3	2	33.3	2.3				Plate7_r01c12f01p01-ch1sk1fk1fl1.tiff
A12_F1R3	A12	Plate 7	GCKR_Intron15_1	GCKR	1	27	3	3	33.3	3.7				Plate7_r01c12f01p01-ch1sk1fk1fl1.tiff
A12_F2R1	A12	Plate 2	MBD3_Intron2_1	MBD3	7	9	13	1	53.8	77.8	MBD3	MBD3_Intron2_1	1	Plate2_r01c12f01p01-ch1sk1fk1fl1.tiff
A12_F2R1	A12	Plate 2	GATAD2A_Intron7_1	GATAD2A	1	58	13	2	7.7	1.7	MBD3	MBD3_Intron2_1	1	Plate2_r01c12f01p01-ch1sk1fk1fl1.tiff
A12_F2R1	A12	Plate 2	WDR82_Intron6_1	WDR82	1	17	13	3	7.7	5.9	MBD3	MBD3_Intron2_1	1	Plate2_r01c12f01p01-ch1sk1fk1fl1.tiff
A12_F2R1	A12	Plate 2	OAT_Intron6_1	OAT	1	121	13	4	7.7	0.8	MBD3	MBD3_Intron2_1	1	Plate2_r01c12f01p01-ch1sk1fk1fl1.tiff
A12_F2R1	A12	Plate 2	APOO_Intron1_1	APOO	1	32	13	>4	7.7	3.1	MBD3	MBD3_Intron2_1	1	Plate2_r01c12f01p01-ch1sk1fk1fl1.tiff
A12_F2R1	A12	Plate 2	PRIM1_Intron5_1	PRIM1	1	62	13	>4	7.7	1.6	MBD3	MBD3_Intron2_1	1	Plate2_r01c12f01p01-ch1sk1fk1fl1.tiff
A12_F2R1	A12	Plate 2	CS_Intron6_1	CS	1	190	13	>4	7.7	0.5	MBD3	MBD3_Intron2_1	1	Plate2_r01c12f01p01-ch1sk1fk1fl1.tiff
A12_F2R2	A12	Plate 5	FAM129B_Intron6_1	FAM129B	6	35	10	1	60	17.1	FAM129B	FAM129B_Intron6_1	1	Plate5_r01c12f01p01-ch1sk1fk1fl1.tiff
A12_F2R2	A12	Plate 5	LTA4H_Intron16_1	LTA4H	1	13	10	2	10	7.7	FAM129B	FAM129B_Intron6_1	1	Plate5_r01c12f01p01-ch1sk1fk1fl1.tiff
A12_F2R2	A12	Plate 5	HADHA_Intron15_1	HADHA	1	59	10	3	10	1.7	FAM129B	FAM129B_Intron6_1	1	Plate5_r01c12f01p01-ch1sk1fk1fl1.tiff
A12_F2R2	A12	Plate 5	KARS_Intron7_1	KARS	1	56	10	4	10	1.8	FAM129B	FAM129B_Intron6_1	1	Plate5_r01c12f01p01-ch1sk1fk1fl1.tiff
A12_F2R2	A12	Plate 5	PARK7_Intron4_2	PARK7	1	139	10	>4	10	0.7	FAM129B	FAM129B_Intron6_1	1	Plate5_r01c12f01p01-ch1sk1fk1fl1.tiff
A12_F2R3	A12	Plate 8	COX5B_Intron2_2	COX5B	1	11	2	1	50	9.1
A12_F2R3	A12	Plate 8	EPHX2_Intron6_1	EPHX2	1	25	2	2	50	4
A12_F3R1	A12	Plate 3	PLCB1_Intron2_1	PLCB1	14	42	14	1	100	33.3	PLCB1	PLCB1_Intron2_1	1	Plate3_r01c12f01p01-ch1sk1fk1fl1.tiff
A12_F3R2	A12	Plate 6	SGF29_Intron9_1	SGF29	1	52	3	1	33.3	1.9				Plate6_r01c12f01p01-ch1sk1fk1fl1.tiff
A12_F3R2	A12	Plate 6	IDE_Intron13_1	IDE	1	94	3	2	33.3	1.1				Plate6_r01c12f01p01-ch1sk1fk1fl1.tiff
A12_F3R2	A12	Plate 6	GARS_Intron1_1	GARS	1	62	3	3	33.3	1.6				Plate6_r01c12f01p01-ch1sk1fk1fl1.tiff
A2_F1R1	A2	Plate 1	PANK3_Intron2_1	PANK3	39	47	84	1	46.4	83	PANK3;PDE9A	PANK3_Intron2_1;PDE9A_Intron16_1	2	Plate1_r01c02f01p01-ch1sk1fk1fl1.tiff
A2_F1R1	A2	Plate 1	PDE9A_Intron16_1	PDE9A	29	42	84	2	34.5	69	PANK3;PDE9A	PANK3_Intron2_1;PDE9A_Intron16_1	2	Plate1_r01c02f01p01-ch1sk1fk1fl1.tiff
A2_F1R1	A2	Plate 1	PFKP_Intron3_2	PFKP	1	51	84	3	1.2	2	PANK3;PDE9A	PANK3_Intron2_1;PDE9A_Intron16_1	2	Plate1_r01c02f01p01-ch1sk1fk1fl1.tiff
A2_F1R1	A2	Plate 1	KMT5A_Intron2_1	KMT5A	1	141	84	4	1.2	0.7	PANK3;PDE9A	PANK3_Intron2_1;PDE9A_Intron16_1	2	Plate1_r01c02f01p01-ch1sk1fk1fl1.tiff
A2_F1R1	A2	Plate 1	GSR_Intron4_1	GSR	1	82	84	>4	1.2	1.2	PANK3;PDE9A	PANK3_Intron2_1;PDE9A_Intron16_1	2	Plate1_r01c02f01p01-ch1sk1fk1fl1.tiff
A2_F1R1	A2	Plate 1	COX6C_Intron2_2	COX6C	1	74	84	>4	1.2	1.4	PANK3;PDE9A	PANK3_Intron2_1;PDE9A_Intron16_1	2	Plate1_r01c02f01p01-ch1sk1fk1fl1.tiff
A2_F1R1	A2	Plate 1	CTR9_Intron1_1	CTR9	1	180	84	>4	1.2	0.6	PANK3;PDE9A	PANK3_Intron2_1;PDE9A_Intron16_1	2	Plate1_r01c02f01p01-ch1sk1fk1fl1.tiff
A2_F1R1	A2	Plate 1	FASN_Intron22_1	FASN	1	55	84	>4	1.2	1.8	PANK3;PDE9A	PANK3_Intron2_1;PDE9A_Intron16_1	2	Plate1_r01c02f01p01-ch1sk1fk1fl1.tiff
A2_F1R1	A2	Plate 1	SUPT6H_Intron28_1	SUPT6H	1	25	84	>4	1.2	4	PANK3;PDE9A	PANK3_Intron2_1;PDE9A_Intron16_1	2	Plate1_r01c02f01p01-ch1sk1fk1fl1.tiff
A2_F1R1	A2	Plate 1	NXN_Intron7_1	NXN	1	85	84	>4	1.2	1.2	PANK3;PDE9A	PANK3_Intron2_1;PDE9A_Intron16_1	2	Plate1_r01c02f01p01-ch1sk1fk1fl1.tiff
A2_F1R1	A2	Plate 1	PYGL_Intron4_1	PYGL	1	121	84	>4	1.2	0.8	PANK3;PDE9A	PANK3_Intron2_1;PDE9A_Intron16_1	2	Plate1_r01c02f01p01-ch1sk1fk1fl1.tiff
A2_F1R1	A2	Plate 1	DLAT_Intron4_1	DLAT	1	65	84	>4	1.2	1.5	PANK3;PDE9A	PANK3_Intron2_1;PDE9A_Intron16_1	2	Plate1_r01c02f01p01-ch1sk1fk1fl1.tiff
A2_F1R1	A2	Plate 1	TARS_Intron1_1	TARS	1	86	84	>4	1.2	1.2	PANK3;PDE9A	PANK3_Intron2_1;PDE9A_Intron16_1	2	Plate1_r01c02f01p01-ch1sk1fk1fl1.tiff
A2_F1R1	A2	Plate 1	NT5C3A_Intron1_1	NT5C3A	1	85	84	>4	1.2	1.2	PANK3;PDE9A	PANK3_Intron2_1;PDE9A_Intron16_1	2	Plate1_r01c02f01p01-ch1sk1fk1fl1.tiff
A2_F1R1	A2	Plate 1	CHST13_Intron2_1	CHST13	1	21	84	>4	1.2	4.8	PANK3;PDE9A	PANK3_Intron2_1;PDE9A_Intron16_1	2	Plate1_r01c02f01p01-ch1sk1fk1fl1.tiff
A2_F1R1	A2	Plate 1	OSBPL11_Intron12_1	OSBPL11	1	74	84	>4	1.2	1.4	PANK3;PDE9A	PANK3_Intron2_1;PDE9A_Intron16_1	2	Plate1_r01c02f01p01-ch1sk1fk1fl1.tiff
A2_F1R1	A2	Plate 1	FH_Intron3_1	FH	1	100	84	>4	1.2	1	PANK3;PDE9A	PANK3_Intron2_1;PDE9A_Intron16_1	2	Plate1_r01c02f01p01-ch1sk1fk1fl1.tiff
A2_F1R1	A2	Plate 1	NME1_Intron3_2	NME1	1	44	84	>4	1.2	2.3	PANK3;PDE9A	PANK3_Intron2_1;PDE9A_Intron16_1	2	Plate1_r01c02f01p01-ch1sk1fk1fl1.tiff
A2_F1R2	A2	Plate 4	SUPT6H_Intron28_1	SUPT6H	20	25	32	1	62.5	80	SUPT6H	SUPT6H_Intron28_1	1	Plate4_r01c02f01p01-ch1sk1fk1fl1.tiff
A2_F1R2	A2	Plate 4	INPP5D_Intron17_1	INPP5D	2	2	32	2	6.3	100	SUPT6H	SUPT6H_Intron28_1	1	Plate4_r01c02f01p01-ch1sk1fk1fl1.tiff
A2_F1R2	A2	Plate 4	COX7A2_Intron2_1	COX7A2	1	31	32	3	3.1	3.2	SUPT6H	SUPT6H_Intron28_1	1	Plate4_r01c02f01p01-ch1sk1fk1fl1.tiff
A2_F1R2	A2	Plate 4	PFKP_Intron3_2	PFKP	1	51	32	4	3.1	2	SUPT6H	SUPT6H_Intron28_1	1	Plate4_r01c02f01p01-ch1sk1fk1fl1.tiff
A2_F1R2	A2	Plate 4	JADE3_Intron3_1	JADE3	1	14	32	>4	3.1	7.1	SUPT6H	SUPT6H_Intron28_1	1	Plate4_r01c02f01p01-ch1sk1fk1fl1.tiff
A2_F1R2	A2	Plate 4	NDUFA8_Intron1_2	NDUFA8	1	39	32	>4	3.1	2.6	SUPT6H	SUPT6H_Intron28_1	1	Plate4_r01c02f01p01-ch1sk1fk1fl1.tiff
A2_F1R2	A2	Plate 4	GLYR1_Intron10_1	GLYR1	1	49	32	>4	3.1	2	SUPT6H	SUPT6H_Intron28_1	1	Plate4_r01c02f01p01-ch1sk1fk1fl1.tiff
A2_F1R2	A2	Plate 4	TFB2M_Intron6_1	TFB2M	1	1	32	>4	3.1	100	SUPT6H	SUPT6H_Intron28_1	1	Plate4_r01c02f01p01-ch1sk1fk1fl1.tiff
A2_F1R2	A2	Plate 4	AURKA_Intron7_2	AURKA	1	1	32	>4	3.1	100	SUPT6H	SUPT6H_Intron28_1	1	Plate4_r01c02f01p01-ch1sk1fk1fl1.tiff
A2_F1R2	A2	Plate 4	FABP6_Intron6_1	FABP6	1	1	32	>4	3.1	100	SUPT6H	SUPT6H_Intron28_1	1	Plate4_r01c02f01p01-ch1sk1fk1fl1.tiff
A2_F1R2	A2	Plate 4	TPI1_Intron5_2	TPI1	1	11	32	>4	3.1	9.1	SUPT6H	SUPT6H_Intron28_1	1	Plate4_r01c02f01p01-ch1sk1fk1fl1.tiff
A2_F1R2	A2	Plate 4	PARK7_Intron4_2	PARK7	1	139	32	>4	3.1	0.7	SUPT6H	SUPT6H_Intron28_1	1	Plate4_r01c02f01p01-ch1sk1fk1fl1.tiff
A2_F1R3	A2	Plate 7	RPA2_Intron3_1	RPA2	23	34	28	1	82.1	67.6	RPA2	RPA2_Intron3_1	1	Plate7_r01c02f01p01-ch1sk1fk1fl1.tiff
A2_F1R3	A2	Plate 7	ACLY_Intron10_1	ACLY	1	56	28	2	3.6	1.8	RPA2	RPA2_Intron3_1	1	Plate7_r01c02f01p01-ch1sk1fk1fl1.tiff
A2_F1R3	A2	Plate 7	AGL_Intron26_1	AGL	1	32	28	3	3.6	3.1	RPA2	RPA2_Intron3_1	1	Plate7_r01c02f01p01-ch1sk1fk1fl1.tiff
A2_F1R3	A2	Plate 7	NDUFA1_Intron2_1	NDUFA1	1	12	28	4	3.6	8.3	RPA2	RPA2_Intron3_1	1	Plate7_r01c02f01p01-ch1sk1fk1fl1.tiff
A2_F1R3	A2	Plate 7	GLA_Intron6_1	GLA	1	18	28	>4	3.6	5.6	RPA2	RPA2_Intron3_1	1	Plate7_r01c02f01p01-ch1sk1fk1fl1.tiff
A2_F1R3	A2	Plate 7	MAT2B_Intron6_1	MAT2B	1	44	28	>4	3.6	2.3	RPA2	RPA2_Intron3_1	1	Plate7_r01c02f01p01-ch1sk1fk1fl1.tiff
A2_F2R1	A2	Plate 2	DPYSL5_Intron11_1	DPYSL5	39	56	54	1	72.2	69.6	DPYSL5	DPYSL5_Intron11_1	1	Plate2_r01c02f01p01-ch1sk1fk1fl1.tiff
A2_F2R1	A2	Plate 2	SOD1_Intron1_1	SOD1	3	18	54	2	5.6	16.7	DPYSL5	DPYSL5_Intron11_1	1	Plate2_r01c02f01p01-ch1sk1fk1fl1.tiff
A2_F2R1	A2	Plate 2	MUT_Intron3_1	MUT	2	43	54	3	3.7	4.7	DPYSL5	DPYSL5_Intron11_1	1	Plate2_r01c02f01p01-ch1sk1fk1fl1.tiff
A2_F2R1	A2	Plate 2	CYP7A1_Intron2_2	CYP7A1	1	82	54	4	1.9	1.2	DPYSL5	DPYSL5_Intron11_1	1	Plate2_r01c02f01p01-ch1sk1fk1fl1.tiff
A2_F2R1	A2	Plate 2	GSR_Intron4_1	GSR	1	82	54	>4	1.9	1.2	DPYSL5	DPYSL5_Intron11_1	1	Plate2_r01c02f01p01-ch1sk1fk1fl1.tiff
A2_F2R1	A2	Plate 2	FMR1_Intron12_1	FMR1	1	112	54	>4	1.9	0.9	DPYSL5	DPYSL5_Intron11_1	1	Plate2_r01c02f01p01-ch1sk1fk1fl1.tiff
A2_F2R1	A2	Plate 2	PANK3_Intron2_1	PANK3	1	47	54	>4	1.9	2.1	DPYSL5	DPYSL5_Intron11_1	1	Plate2_r01c02f01p01-ch1sk1fk1fl1.tiff
A2_F2R1	A2	Plate 2	GAPDH_Intron3_2	GAPDH	1	71	54	>4	1.9	1.4	DPYSL5	DPYSL5_Intron11_1	1	Plate2_r01c02f01p01-ch1sk1fk1fl1.tiff
A2_F2R1	A2	Plate 2	HUWE1_Intron8_1	HUWE1	1	142	54	>4	1.9	0.7	DPYSL5	DPYSL5_Intron11_1	1	Plate2_r01c02f01p01-ch1sk1fk1fl1.tiff
A2_F2R1	A2	Plate 2	PDE9A_Intron16_1	PDE9A	1	42	54	>4	1.9	2.4	DPYSL5	DPYSL5_Intron11_1	1	Plate2_r01c02f01p01-ch1sk1fk1fl1.tiff
A2_F2R1	A2	Plate 2	GFPT1_Intron19_1	GFPT1	1	85	54	>4	1.9	1.2	DPYSL5	DPYSL5_Intron11_1	1	Plate2_r01c02f01p01-ch1sk1fk1fl1.tiff
A2_F2R1	A2	Plate 2	GARS_Intron1_1	GARS	1	62	54	>4	1.9	1.6	DPYSL5	DPYSL5_Intron11_1	1	Plate2_r01c02f01p01-ch1sk1fk1fl1.tiff
A2_F2R1	A2	Plate 2	HADHA_Intron14_1	HADHA	1	43	54	>4	1.9	2.3	DPYSL5	DPYSL5_Intron11_1	1	Plate2_r01c02f01p01-ch1sk1fk1fl1.tiff
A2_F2R2	A2	Plate 5	SDHB_Intron5_1	SDHB	23	87	29	1	79.3	26.4	SDHB	SDHB_Intron5_1	1	Plate5_r01c02f01p01-ch1sk1fk1fl1.tiff
A2_F2R2	A2	Plate 5	PDE12_Intron1_2	PDE12	1	36	29	2	3.4	2.8	SDHB	SDHB_Intron5_1	1	Plate5_r01c02f01p01-ch1sk1fk1fl1.tiff
A2_F2R2	A2	Plate 5	PLOD1_Intron7_1	PLOD1	1	9	29	3	3.4	11.1	SDHB	SDHB_Intron5_1	1	Plate5_r01c02f01p01-ch1sk1fk1fl1.tiff
A2_F2R2	A2	Plate 5	COX7A2_Intron2_2	COX7A2	1	28	29	4	3.4	3.6	SDHB	SDHB_Intron5_1	1	Plate5_r01c02f01p01-ch1sk1fk1fl1.tiff
A2_F2R2	A2	Plate 5	TARS2_Intron1_1	TARS2	1	1	29	>4	3.4	100	SDHB	SDHB_Intron5_1	1	Plate5_r01c02f01p01-ch1sk1fk1fl1.tiff
A2_F2R2	A2	Plate 5	CYB5R3_Intron2_1	CYB5R3	1	270	29	>4	3.4	0.4	SDHB	SDHB_Intron5_1	1	Plate5_r01c02f01p01-ch1sk1fk1fl1.tiff
A2_F2R2	A2	Plate 5	HUWE1_Intron8_1	HUWE1	1	142	29	>4	3.4	0.7	SDHB	SDHB_Intron5_1	1	Plate5_r01c02f01p01-ch1sk1fk1fl1.tiff
A2_F2R3	A2	Plate 8	IDH1_Intron4_2	IDH1	10	104	24	1	41.7	9.6				Plate8_r01c02f01p01-ch1sk1fk1fl1.tiff
A2_F2R3	A2	Plate 8	BCOR_Intron3_1	BCOR	10	15	24	2	41.7	66.7				Plate8_r01c02f01p01-ch1sk1fk1fl1.tiff
A2_F2R3	A2	Plate 8	EDEM2_Intron7_1	EDEM2	1	20	24	3	4.2	5				Plate8_r01c02f01p01-ch1sk1fk1fl1.tiff
A2_F2R3	A2	Plate 8	DNMT1_Intron37_1	DNMT1	1	2	24	4	4.2	50				Plate8_r01c02f01p01-ch1sk1fk1fl1.tiff
A2_F2R3	A2	Plate 8	TARS_Intron9_1	TARS	1	22	24	>4	4.2	4.5				Plate8_r01c02f01p01-ch1sk1fk1fl1.tiff
A2_F2R3	A2	Plate 8	DPYSL5_Intron11_1	DPYSL5	1	56	24	>4	4.2	1.8				Plate8_r01c02f01p01-ch1sk1fk1fl1.tiff
A2_F3R1	A2	Plate 3	ATAD3B_Intron7_1	ATAD3B	20	31	28	1	71.4	64.5	ATAD3B	ATAD3B_Intron7_1	1	Plate3_r01c02f01p01-ch1sk1fk1fl1.tiff
A2_F3R1	A2	Plate 3	MUT_Intron3_1	MUT	2	43	28	2	7.1	4.7	ATAD3B	ATAD3B_Intron7_1	1	Plate3_r01c02f01p01-ch1sk1fk1fl1.tiff
A2_F3R1	A2	Plate 3	SREBF2_Intron4_1	SREBF2	1	45	28	3	3.6	2.2	ATAD3B	ATAD3B_Intron7_1	1	Plate3_r01c02f01p01-ch1sk1fk1fl1.tiff
A2_F3R1	A2	Plate 3	FMO3_Intron2_2	FMO3	1	20	28	4	3.6	5	ATAD3B	ATAD3B_Intron7_1	1	Plate3_r01c02f01p01-ch1sk1fk1fl1.tiff
A2_F3R1	A2	Plate 3	DHRS2_Intron3_1	DHRS2	1	7	28	>4	3.6	14.3	ATAD3B	ATAD3B_Intron7_1	1	Plate3_r01c02f01p01-ch1sk1fk1fl1.tiff
A2_F3R1	A2	Plate 3	ATAD3A_Intron4_1	ATAD3A	1	185	28	>4	3.6	0.5	ATAD3B	ATAD3B_Intron7_1	1	Plate3_r01c02f01p01-ch1sk1fk1fl1.tiff
A2_F3R1	A2	Plate 3	PYGO2_Intron2_2	PYGO2	1	87	28	>4	3.6	1.1	ATAD3B	ATAD3B_Intron7_1	1	Plate3_r01c02f01p01-ch1sk1fk1fl1.tiff
A2_F3R1	A2	Plate 3	CERS2_Intron3_1	CERS2	1	38	28	>4	3.6	2.6	ATAD3B	ATAD3B_Intron7_1	1	Plate3_r01c02f01p01-ch1sk1fk1fl1.tiff
A2_F3R2	A2	Plate 6	DOT1L_Intron4_1	DOT1L	13	85	25	1	52	15.3	DOT1L	DOT1L_Intron4_1	1	Plate6_r01c02f01p01-ch1sk1fk1fl1.tiff
A2_F3R2	A2	Plate 6	CERS2_Intron5_1	CERS2	4	60	25	2	16	6.7	DOT1L	DOT1L_Intron4_1	1	Plate6_r01c02f01p01-ch1sk1fk1fl1.tiff
A2_F3R2	A2	Plate 6	NUDT14_Intron1_1	NUDT14	3	61	25	3	12	4.9	DOT1L	DOT1L_Intron4_1	1	Plate6_r01c02f01p01-ch1sk1fk1fl1.tiff
A2_F3R2	A2	Plate 6	NDUFS6_Intron2_1	NDUFS6	1	54	25	4	4	1.9	DOT1L	DOT1L_Intron4_1	1	Plate6_r01c02f01p01-ch1sk1fk1fl1.tiff
A2_F3R2	A2	Plate 6	SET_Intron4_1	SET	1	40	25	>4	4	2.5	DOT1L	DOT1L_Intron4_1	1	Plate6_r01c02f01p01-ch1sk1fk1fl1.tiff
A2_F3R2	A2	Plate 6	APEH_Intron10_1	APEH	1	7	25	>4	4	14.3	DOT1L	DOT1L_Intron4_1	1	Plate6_r01c02f01p01-ch1sk1fk1fl1.tiff
A2_F3R2	A2	Plate 6	SNCA_Intron4_1	SNCA	1	25	25	>4	4	4	DOT1L	DOT1L_Intron4_1	1	Plate6_r01c02f01p01-ch1sk1fk1fl1.tiff
A2_F3R2	A2	Plate 6	PARK7_Intron4_2	PARK7	1	139	25	>4	4	0.7	DOT1L	DOT1L_Intron4_1	1	Plate6_r01c02f01p01-ch1sk1fk1fl1.tiff
A2_F3R3	A2	Plate 9	TARS_Intron9_1	TARS	1	22	3	1	33.3	4.5
A2_F3R3	A2	Plate 9	PYGO2_Intron2_2	PYGO2	1	87	3	2	33.3	1.1
A2_F3R3	A2	Plate 9	MAT2B_Intron6_1	MAT2B	1	44	3	3	33.3	2.3
A3_F1R1	A3	Plate 1	CTR9_Intron1_1	CTR9	40	180	65	1	61.5	22.2	CTR9	CTR9_Intron1_1	1	Plate1_r01c03f01p01-ch1sk1fk1fl1.tiff
A3_F1R1	A3	Plate 1	CYB5R3_Intron2_1	CYB5R3	2	270	65	2	3.1	0.7	CTR9	CTR9_Intron1_1	1	Plate1_r01c03f01p01-ch1sk1fk1fl1.tiff
A3_F1R1	A3	Plate 1	P4HB_Intron9_1	P4HB	2	60	65	3	3.1	3.3	CTR9	CTR9_Intron1_1	1	Plate1_r01c03f01p01-ch1sk1fk1fl1.tiff
A3_F1R1	A3	Plate 1	CYP7A1_Intron2_2	CYP7A1	2	82	65	4	3.1	2.4	CTR9	CTR9_Intron1_1	1	Plate1_r01c03f01p01-ch1sk1fk1fl1.tiff
A3_F1R1	A3	Plate 1	P4HB_Intron10_1	P4HB	2	47	65	>4	3.1	4.3	CTR9	CTR9_Intron1_1	1	Plate1_r01c03f01p01-ch1sk1fk1fl1.tiff
A3_F1R1	A3	Plate 1	LARS2_Intron4_1	LARS2	1	98	65	>4	1.5	1	CTR9	CTR9_Intron1_1	1	Plate1_r01c03f01p01-ch1sk1fk1fl1.tiff
A3_F1R1	A3	Plate 1	DARS2_Intron9_1	DARS2	1	80	65	>4	1.5	1.3	CTR9	CTR9_Intron1_1	1	Plate1_r01c03f01p01-ch1sk1fk1fl1.tiff
A3_F1R1	A3	Plate 1	ARG1_Intron4_1	ARG1	1	47	65	>4	1.5	2.1	CTR9	CTR9_Intron1_1	1	Plate1_r01c03f01p01-ch1sk1fk1fl1.tiff
A3_F1R1	A3	Plate 1	FKBP15_Intron9_1	FKBP15	1	6	65	>4	1.5	16.7	CTR9	CTR9_Intron1_1	1	Plate1_r01c03f01p01-ch1sk1fk1fl1.tiff
A3_F1R1	A3	Plate 1	BAZ1B_Intron17_1	BAZ1B	1	32	65	>4	1.5	3.1	CTR9	CTR9_Intron1_1	1	Plate1_r01c03f01p01-ch1sk1fk1fl1.tiff
A3_F1R1	A3	Plate 1	PDHA1_Intron2_1	PDHA1	1	23	65	>4	1.5	4.3	CTR9	CTR9_Intron1_1	1	Plate1_r01c03f01p01-ch1sk1fk1fl1.tiff
A3_F1R1	A3	Plate 1	MTR_Intron7_1	MTR	1	57	65	>4	1.5	1.8	CTR9	CTR9_Intron1_1	1	Plate1_r01c03f01p01-ch1sk1fk1fl1.tiff
A3_F1R1	A3	Plate 1	COX6C_Intron2_2	COX6C	1	74	65	>4	1.5	1.4	CTR9	CTR9_Intron1_1	1	Plate1_r01c03f01p01-ch1sk1fk1fl1.tiff
A3_F1R1	A3	Plate 1	DPYSL5_Intron11_1	DPYSL5	1	56	65	>4	1.5	1.8	CTR9	CTR9_Intron1_1	1	Plate1_r01c03f01p01-ch1sk1fk1fl1.tiff
A3_F1R1	A3	Plate 1	SET_Intron6_1	SET	1	39	65	>4	1.5	2.6	CTR9	CTR9_Intron1_1	1	Plate1_r01c03f01p01-ch1sk1fk1fl1.tiff
A3_F1R1	A3	Plate 1	CTNNB1_Intron4_1	CTNNB1	1	70	65	>4	1.5	1.4	CTR9	CTR9_Intron1_1	1	Plate1_r01c03f01p01-ch1sk1fk1fl1.tiff
A3_F1R1	A3	Plate 1	PRIM1_Intron5_1	PRIM1	1	62	65	>4	1.5	1.6	CTR9	CTR9_Intron1_1	1	Plate1_r01c03f01p01-ch1sk1fk1fl1.tiff
A3_F1R1	A3	Plate 1	ATAD3B_Intron7_1	ATAD3B	1	31	65	>4	1.5	3.2	CTR9	CTR9_Intron1_1	1	Plate1_r01c03f01p01-ch1sk1fk1fl1.tiff
A3_F1R1	A3	Plate 1	MUT_Intron3_1	MUT	1	43	65	>4	1.5	2.3	CTR9	CTR9_Intron1_1	1	Plate1_r01c03f01p01-ch1sk1fk1fl1.tiff
A3_F1R1	A3	Plate 1	PNPO_Intron1_2	PNPO	1	52	65	>4	1.5	1.9	CTR9	CTR9_Intron1_1	1	Plate1_r01c03f01p01-ch1sk1fk1fl1.tiff
A3_F1R1	A3	Plate 1	PDE9A_Intron16_1	PDE9A	1	42	65	>4	1.5	2.4	CTR9	CTR9_Intron1_1	1	Plate1_r01c03f01p01-ch1sk1fk1fl1.tiff
A3_F1R1	A3	Plate 1	PARK7_Intron4_2	PARK7	1	139	65	>4	1.5	0.7	CTR9	CTR9_Intron1_1	1	Plate1_r01c03f01p01-ch1sk1fk1fl1.tiff
A3_F1R2	A3	Plate 4	PHF8_Intron21_1	PHF8	43	57	56	1	76.8	75.4	PHF8	PHF8_Intron21_1	1	Plate4_r01c03f01p01-ch1sk1fk1fl1.tiff
A3_F1R2	A3	Plate 4	PARK7_Intron4_2	PARK7	2	139	56	2	3.6	1.4	PHF8	PHF8_Intron21_1	1	Plate4_r01c03f01p01-ch1sk1fk1fl1.tiff
A3_F1R2	A3	Plate 4	QSOX1_Intron9_1	QSOX1	1	21	56	3	1.8	4.8	PHF8	PHF8_Intron21_1	1	Plate4_r01c03f01p01-ch1sk1fk1fl1.tiff
A3_F1R2	A3	Plate 4	COX7A2_Intron2_1	COX7A2	1	31	56	4	1.8	3.2	PHF8	PHF8_Intron21_1	1	Plate4_r01c03f01p01-ch1sk1fk1fl1.tiff
A3_F1R2	A3	Plate 4	SMOX_Intron7_1	SMOX	1	57	56	>4	1.8	1.8	PHF8	PHF8_Intron21_1	1	Plate4_r01c03f01p01-ch1sk1fk1fl1.tiff
A3_F1R2	A3	Plate 4	MTR_Intron7_1	MTR	1	57	56	>4	1.8	1.8	PHF8	PHF8_Intron21_1	1	Plate4_r01c03f01p01-ch1sk1fk1fl1.tiff
A3_F1R2	A3	Plate 4	EZH2_Intron4_1	EZH2	1	90	56	>4	1.8	1.1	PHF8	PHF8_Intron21_1	1	Plate4_r01c03f01p01-ch1sk1fk1fl1.tiff
A3_F1R2	A3	Plate 4	NNT_Intron9_1	NNT	1	30	56	>4	1.8	3.3	PHF8	PHF8_Intron21_1	1	Plate4_r01c03f01p01-ch1sk1fk1fl1.tiff
A3_F1R2	A3	Plate 4	CTR9_Intron1_1	CTR9	1	180	56	>4	1.8	0.6	PHF8	PHF8_Intron21_1	1	Plate4_r01c03f01p01-ch1sk1fk1fl1.tiff
A3_F1R2	A3	Plate 4	ACAT1_Intron5_1	ACAT1	1	19	56	>4	1.8	5.3	PHF8	PHF8_Intron21_1	1	Plate4_r01c03f01p01-ch1sk1fk1fl1.tiff
A3_F1R2	A3	Plate 4	HTR3D_Intron3_3	HTR3D	1	13	56	>4	1.8	7.7	PHF8	PHF8_Intron21_1	1	Plate4_r01c03f01p01-ch1sk1fk1fl1.tiff
A3_F1R2	A3	Plate 4	CS_Intron6_1	CS	1	190	56	>4	1.8	0.5	PHF8	PHF8_Intron21_1	1	Plate4_r01c03f01p01-ch1sk1fk1fl1.tiff
A3_F1R2	A3	Plate 4	HADHA_Intron15_1	HADHA	1	59	56	>4	1.8	1.7	PHF8	PHF8_Intron21_1	1	Plate4_r01c03f01p01-ch1sk1fk1fl1.tiff
A3_F1R3	A3	Plate 7	PARK7_Intron4_2	PARK7	55	139	64	1	85.9	39.6	PARK7	PARK7_Intron4_2	1	Plate7_r01c03f01p01-ch1sk1fk1fl1.tiff
A3_F1R3	A3	Plate 7	CTR9_Intron1_1	CTR9	2	180	64	2	3.1	1.1	PARK7	PARK7_Intron4_2	1	Plate7_r01c03f01p01-ch1sk1fk1fl1.tiff
A3_F1R3	A3	Plate 7	ACLY_Intron10_1	ACLY	1	56	64	3	1.6	1.8	PARK7	PARK7_Intron4_2	1	Plate7_r01c03f01p01-ch1sk1fk1fl1.tiff
A3_F1R3	A3	Plate 7	PAPSS2_Intron3_1	PAPSS2	1	18	64	4	1.6	5.6	PARK7	PARK7_Intron4_2	1	Plate7_r01c03f01p01-ch1sk1fk1fl1.tiff
A3_F1R3	A3	Plate 7	ALDH9A1_Intron6_1	ALDH9A1	1	101	64	>4	1.6	1	PARK7	PARK7_Intron4_2	1	Plate7_r01c03f01p01-ch1sk1fk1fl1.tiff
A3_F1R3	A3	Plate 7	USP9X_Intron42_1	USP9X	1	40	64	>4	1.6	2.5	PARK7	PARK7_Intron4_2	1	Plate7_r01c03f01p01-ch1sk1fk1fl1.tiff
A3_F1R3	A3	Plate 7	KDM3B_Intron6_1	KDM3B	1	32	64	>4	1.6	3.1	PARK7	PARK7_Intron4_2	1	Plate7_r01c03f01p01-ch1sk1fk1fl1.tiff
A3_F1R3	A3	Plate 7	MAT2B_Intron6_1	MAT2B	1	44	64	>4	1.6	2.3	PARK7	PARK7_Intron4_2	1	Plate7_r01c03f01p01-ch1sk1fk1fl1.tiff
A3_F1R3	A3	Plate 7	PHF8_Intron21_1	PHF8	1	57	64	>4	1.6	1.8	PARK7	PARK7_Intron4_2	1	Plate7_r01c03f01p01-ch1sk1fk1fl1.tiff
A3_F2R1	A3	Plate 2	GATAD2A_Intron7_1	GATAD2A	12	58	21	1	57.1	20.7	GATAD2A	GATAD2A_Intron7_1	1	Plate2_r01c03f01p01-ch1sk1fk1fl1.tiff
A3_F2R1	A3	Plate 2	MEAF6_Intron1_2	MEAF6	1	11	21	2	4.8	9.1	GATAD2A	GATAD2A_Intron7_1	1	Plate2_r01c03f01p01-ch1sk1fk1fl1.tiff
A3_F2R1	A3	Plate 2	AKR1C2_Intron5_1	AKR1C2	1	30	21	3	4.8	3.3	GATAD2A	GATAD2A_Intron7_1	1	Plate2_r01c03f01p01-ch1sk1fk1fl1.tiff
A3_F2R1	A3	Plate 2	DPYSL5_Intron11_1	DPYSL5	1	56	21	4	4.8	1.8	GATAD2A	GATAD2A_Intron7_1	1	Plate2_r01c03f01p01-ch1sk1fk1fl1.tiff
A3_F2R1	A3	Plate 2	GARS_Intron6_1	GARS	1	20	21	>4	4.8	5	GATAD2A	GATAD2A_Intron7_1	1	Plate2_r01c03f01p01-ch1sk1fk1fl1.tiff
A3_F2R1	A3	Plate 2	HADHA_Intron10_1	HADHA	1	42	21	>4	4.8	2.4	GATAD2A	GATAD2A_Intron7_1	1	Plate2_r01c03f01p01-ch1sk1fk1fl1.tiff
A3_F2R1	A3	Plate 2	CERS2_Intron3_1	CERS2	1	38	21	>4	4.8	2.6	GATAD2A	GATAD2A_Intron7_1	1	Plate2_r01c03f01p01-ch1sk1fk1fl1.tiff
A3_F2R1	A3	Plate 2	OSBPL11_Intron12_1	OSBPL11	1	74	21	>4	4.8	1.4	GATAD2A	GATAD2A_Intron7_1	1	Plate2_r01c03f01p01-ch1sk1fk1fl1.tiff
A3_F2R1	A3	Plate 2	FH_Intron3_1	FH	1	100	21	>4	4.8	1	GATAD2A	GATAD2A_Intron7_1	1	Plate2_r01c03f01p01-ch1sk1fk1fl1.tiff
A3_F2R1	A3	Plate 2	PLCB1_Intron2_1	PLCB1	1	42	21	>4	4.8	2.4	GATAD2A	GATAD2A_Intron7_1	1	Plate2_r01c03f01p01-ch1sk1fk1fl1.tiff
A3_F2R2	A3	Plate 5	LDHB_Intron2_1	LDHB	6	6	10	1	60	100	LDHB	LDHB_Intron2_1	1	Plate5_r01c03f01p01-ch1sk1fk1fl1.tiff
A3_F2R2	A3	Plate 5	SART3_Intron4_1	SART3	1	21	10	2	10	4.8	LDHB	LDHB_Intron2_1	1	Plate5_r01c03f01p01-ch1sk1fk1fl1.tiff
A3_F2R2	A3	Plate 5	ACAA1_Intron1_2	ACAA1	1	28	10	3	10	3.6	LDHB	LDHB_Intron2_1	1	Plate5_r01c03f01p01-ch1sk1fk1fl1.tiff
A3_F2R2	A3	Plate 5	CYB5R3_Intron2_1	CYB5R3	1	270	10	4	10	0.4	LDHB	LDHB_Intron2_1	1	Plate5_r01c03f01p01-ch1sk1fk1fl1.tiff
A3_F2R2	A3	Plate 5	MAOB_Intron4_1	MAOB	1	36	10	>4	10	2.8	LDHB	LDHB_Intron2_1	1	Plate5_r01c03f01p01-ch1sk1fk1fl1.tiff
A3_F2R3	A3	Plate 8	PSAT1_Intron1_2	PSAT1	6	52	7	1	85.7	11.5	PSAT1	PSAT1_Intron1_2	1	Plate8_r01c03f01p01-ch1sk1fk1fl1.tiff
A3_F2R3	A3	Plate 8	HADHA_Intron15_1	HADHA	1	59	7	2	14.3	1.7	PSAT1	PSAT1_Intron1_2	1	Plate8_r01c03f01p01-ch1sk1fk1fl1.tiff
A3_F3R1	A3	Plate 3	MTHFD1_Intron22_2	MTHFD1	3	74	12	1	25	4.1				Plate3_r01c03f01p01-ch1sk1fk1fl1.tiff
A3_F3R1	A3	Plate 3	AKR1C2_Intron5_1	AKR1C2	2	30	12	2	16.7	6.7				Plate3_r01c03f01p01-ch1sk1fk1fl1.tiff
A3_F3R1	A3	Plate 3	H2AFY_Intron4_2	H2AFY	1	31	12	3	8.3	3.2				Plate3_r01c03f01p01-ch1sk1fk1fl1.tiff
A3_F3R1	A3	Plate 3	CTBP1_Intron2_1	CTBP1	1	4	12	4	8.3	25				Plate3_r01c03f01p01-ch1sk1fk1fl1.tiff
A3_F3R1	A3	Plate 3	ALDH7A1_Intron1_1	ALDH7A1	1	81	12	>4	8.3	1.2				Plate3_r01c03f01p01-ch1sk1fk1fl1.tiff
A3_F3R1	A3	Plate 3	PPA1_Intron3_1	PPA1	1	27	12	>4	8.3	3.7				Plate3_r01c03f01p01-ch1sk1fk1fl1.tiff
A3_F3R1	A3	Plate 3	GSR_Intron4_1	GSR	1	82	12	>4	8.3	1.2				Plate3_r01c03f01p01-ch1sk1fk1fl1.tiff
A3_F3R1	A3	Plate 3	DPYSL5_Intron11_1	DPYSL5	1	56	12	>4	8.3	1.8				Plate3_r01c03f01p01-ch1sk1fk1fl1.tiff
A3_F3R1	A3	Plate 3	SREBF1_Intron7_1	SREBF1	1	15	12	>4	8.3	6.7				Plate3_r01c03f01p01-ch1sk1fk1fl1.tiff
A3_F3R2	A3	Plate 6	AGPS_Intron13_1	AGPS	14	21	29	1	48.3	66.7	AGPS;SYNJ2	AGPS_Intron13_1;SYNJ2_Intron10_1	2	Plate6_r01c03f01p01-ch1sk1fk1fl1.tiff
A3_F3R2	A3	Plate 6	SYNJ2_Intron10_1	SYNJ2	11	18	29	2	37.9	61.1	AGPS;SYNJ2	AGPS_Intron13_1;SYNJ2_Intron10_1	2	Plate6_r01c03f01p01-ch1sk1fk1fl1.tiff
A3_F3R2	A3	Plate 6	ALDH7A1_Intron1_1	ALDH7A1	1	81	29	3	3.4	1.2	AGPS;SYNJ2	AGPS_Intron13_1;SYNJ2_Intron10_1	2	Plate6_r01c03f01p01-ch1sk1fk1fl1.tiff
A3_F3R2	A3	Plate 6	GANAB_Intron21_1	GANAB	1	90	29	4	3.4	1.1	AGPS;SYNJ2	AGPS_Intron13_1;SYNJ2_Intron10_1	2	Plate6_r01c03f01p01-ch1sk1fk1fl1.tiff
A3_F3R2	A3	Plate 6	NDUFA8_Intron1_2	NDUFA8	1	39	29	>4	3.4	2.6	AGPS;SYNJ2	AGPS_Intron13_1;SYNJ2_Intron10_1	2	Plate6_r01c03f01p01-ch1sk1fk1fl1.tiff
A3_F3R2	A3	Plate 6	PHF8_Intron21_1	PHF8	1	57	29	>4	3.4	1.8	AGPS;SYNJ2	AGPS_Intron13_1;SYNJ2_Intron10_1	2	Plate6_r01c03f01p01-ch1sk1fk1fl1.tiff
A3_F3R3	A3	Plate 9	BCOR_Intron3_1	BCOR	1	15	3	1	33.3	6.7
A3_F3R3	A3	Plate 9	PSAT1_Intron1_2	PSAT1	1	52	3	2	33.3	1.9
A3_F3R3	A3	Plate 9	NDUFA1_Intron2_1	NDUFA1	1	12	3	3	33.3	8.3
A4_F1R1	A4	Plate 1	OAS3_Intron15_1	OAS3	25	39	37	1	67.6	64.1	OAS3	OAS3_Intron15_1	1	Plate1_r01c04f01p01-ch1sk1fk1fl1.tiff
A4_F1R1	A4	Plate 1	HADH_Intron2_1	HADH	2	148	37	2	5.4	1.4	OAS3	OAS3_Intron15_1	1	Plate1_r01c04f01p01-ch1sk1fk1fl1.tiff
A4_F1R1	A4	Plate 1	PDHB_Intron5_1	PDHB	1	22	37	3	2.7	4.5	OAS3	OAS3_Intron15_1	1	Plate1_r01c04f01p01-ch1sk1fk1fl1.tiff
A4_F1R1	A4	Plate 1	UST_Intron3_1	UST	1	1	37	4	2.7	100	OAS3	OAS3_Intron15_1	1	Plate1_r01c04f01p01-ch1sk1fk1fl1.tiff
A4_F1R1	A4	Plate 1	PFKM_Intron10_1	PFKM	1	18	37	>4	2.7	5.6	OAS3	OAS3_Intron15_1	1	Plate1_r01c04f01p01-ch1sk1fk1fl1.tiff
A4_F1R1	A4	Plate 1	ALDH9A1_Intron6_1	ALDH9A1	1	101	37	>4	2.7	1	OAS3	OAS3_Intron15_1	1	Plate1_r01c04f01p01-ch1sk1fk1fl1.tiff
A4_F1R1	A4	Plate 1	CTR9_Intron1_1	CTR9	1	180	37	>4	2.7	0.6	OAS3	OAS3_Intron15_1	1	Plate1_r01c04f01p01-ch1sk1fk1fl1.tiff
A4_F1R1	A4	Plate 1	PRIM1_Intron5_1	PRIM1	1	62	37	>4	2.7	1.6	OAS3	OAS3_Intron15_1	1	Plate1_r01c04f01p01-ch1sk1fk1fl1.tiff
A4_F1R1	A4	Plate 1	MUT_Intron3_1	MUT	1	43	37	>4	2.7	2.3	OAS3	OAS3_Intron15_1	1	Plate1_r01c04f01p01-ch1sk1fk1fl1.tiff
A4_F1R1	A4	Plate 1	SMOX_Intron7_1	SMOX	1	57	37	>4	2.7	1.8	OAS3	OAS3_Intron15_1	1	Plate1_r01c04f01p01-ch1sk1fk1fl1.tiff
A4_F1R1	A4	Plate 1	EPHX2_Intron6_1	EPHX2	1	25	37	>4	2.7	4	OAS3	OAS3_Intron15_1	1	Plate1_r01c04f01p01-ch1sk1fk1fl1.tiff
A4_F1R1	A4	Plate 1	CA8_Intron4_1	CA8	1	30	37	>4	2.7	3.3	OAS3	OAS3_Intron15_1	1	Plate1_r01c04f01p01-ch1sk1fk1fl1.tiff
A4_F1R2	A4	Plate 4	PDHB_Intron5_1	PDHB	14	22	21	1	66.7	63.6	PDHB	PDHB_Intron5_1	1	Plate4_r01c04f01p01-ch1sk1fk1fl1.tiff
A4_F1R2	A4	Plate 4	ACAT1_Intron5_1	ACAT1	2	19	21	2	9.5	10.5	PDHB	PDHB_Intron5_1	1	Plate4_r01c04f01p01-ch1sk1fk1fl1.tiff
A4_F1R2	A4	Plate 4	TALDO1_Intron7_1	TALDO1	1	45	21	3	4.8	2.2	PDHB	PDHB_Intron5_1	1	Plate4_r01c04f01p01-ch1sk1fk1fl1.tiff
A4_F1R2	A4	Plate 4	HAGHL_Intron2_1	HAGHL	1	14	21	4	4.8	7.1	PDHB	PDHB_Intron5_1	1	Plate4_r01c04f01p01-ch1sk1fk1fl1.tiff
A4_F1R2	A4	Plate 4	GCSH_Intron2_3	GCSH	1	43	21	>4	4.8	2.3	PDHB	PDHB_Intron5_1	1	Plate4_r01c04f01p01-ch1sk1fk1fl1.tiff
A4_F1R2	A4	Plate 4	NDUFA8_Intron1_2	NDUFA8	1	39	21	>4	4.8	2.6	PDHB	PDHB_Intron5_1	1	Plate4_r01c04f01p01-ch1sk1fk1fl1.tiff
A4_F1R2	A4	Plate 4	NXN_Intron3_1	NXN	1	51	21	>4	4.8	2	PDHB	PDHB_Intron5_1	1	Plate4_r01c04f01p01-ch1sk1fk1fl1.tiff
A4_F1R3	A4	Plate 7	NDUFA1_Intron2_1	NDUFA1	9	12	14	1	64.3	75	NDUFA1	NDUFA1_Intron2_1	1	Plate7_r01c04f01p01-ch1sk1fk1fl1.tiff
A4_F1R3	A4	Plate 7	TALDO1_Intron7_1	TALDO1	1	45	14	2	7.1	2.2	NDUFA1	NDUFA1_Intron2_1	1	Plate7_r01c04f01p01-ch1sk1fk1fl1.tiff
A4_F1R3	A4	Plate 7	HADH_Intron2_1	HADH	1	148	14	3	7.1	0.7	NDUFA1	NDUFA1_Intron2_1	1	Plate7_r01c04f01p01-ch1sk1fk1fl1.tiff
A4_F1R3	A4	Plate 7	PSAT1_Intron1_2	PSAT1	1	52	14	4	7.1	1.9	NDUFA1	NDUFA1_Intron2_1	1	Plate7_r01c04f01p01-ch1sk1fk1fl1.tiff
A4_F1R3	A4	Plate 7	MTHFD1_Intron22_2	MTHFD1	1	74	14	>4	7.1	1.4	NDUFA1	NDUFA1_Intron2_1	1	Plate7_r01c04f01p01-ch1sk1fk1fl1.tiff
A4_F1R3	A4	Plate 7	GFPT1_Intron19_1	GFPT1	1	85	14	>4	7.1	1.2	NDUFA1	NDUFA1_Intron2_1	1	Plate7_r01c04f01p01-ch1sk1fk1fl1.tiff
A4_F2R1	A4	Plate 2	CYB5R3_Intron2_1	CYB5R3	39	270	46	1	84.8	14.4	CYB5R3	CYB5R3_Intron2_1	1	Plate2_r01c04f01p01-ch1sk1fk1fl1.tiff
A4_F2R1	A4	Plate 2	TADA3_Intron6_1	TADA3	1	44	46	2	2.2	2.3	CYB5R3	CYB5R3_Intron2_1	1	Plate2_r01c04f01p01-ch1sk1fk1fl1.tiff
A4_F2R1	A4	Plate 2	IDH3B_Intron2_1	IDH3B	1	49	46	3	2.2	2	CYB5R3	CYB5R3_Intron2_1	1	Plate2_r01c04f01p01-ch1sk1fk1fl1.tiff
A4_F2R1	A4	Plate 2	DPYSL5_Intron11_1	DPYSL5	1	56	46	4	2.2	1.8	CYB5R3	CYB5R3_Intron2_1	1	Plate2_r01c04f01p01-ch1sk1fk1fl1.tiff
A4_F2R1	A4	Plate 2	FASN_Intron22_1	FASN	1	55	46	>4	2.2	1.8	CYB5R3	CYB5R3_Intron2_1	1	Plate2_r01c04f01p01-ch1sk1fk1fl1.tiff
A4_F2R1	A4	Plate 2	PKM_Intron3_1	PKM	1	72	46	>4	2.2	1.4	CYB5R3	CYB5R3_Intron2_1	1	Plate2_r01c04f01p01-ch1sk1fk1fl1.tiff
A4_F2R1	A4	Plate 2	RRM1_Intron17_1	RRM1	1	60	46	>4	2.2	1.7	CYB5R3	CYB5R3_Intron2_1	1	Plate2_r01c04f01p01-ch1sk1fk1fl1.tiff
A4_F2R1	A4	Plate 2	TAF9B_Intron1_2	TAF9B	1	87	46	>4	2.2	1.1	CYB5R3	CYB5R3_Intron2_1	1	Plate2_r01c04f01p01-ch1sk1fk1fl1.tiff
A4_F2R2	A4	Plate 5	FAM129B_Intron6_1	FAM129B	20	35	25	1	80	57.1	FAM129B	FAM129B_Intron6_1	1	Plate5_r01c04f01p01-ch1sk1fk1fl1.tiff
A4_F2R2	A4	Plate 5	PLCG1_Intron7_1	PLCG1	1	13	25	2	4	7.7	FAM129B	FAM129B_Intron6_1	1	Plate5_r01c04f01p01-ch1sk1fk1fl1.tiff
A4_F2R2	A4	Plate 5	SET_Intron4_1	SET	1	40	25	3	4	2.5	FAM129B	FAM129B_Intron6_1	1	Plate5_r01c04f01p01-ch1sk1fk1fl1.tiff
A4_F2R2	A4	Plate 5	HADH_Intron2_1	HADH	1	148	25	4	4	0.7	FAM129B	FAM129B_Intron6_1	1	Plate5_r01c04f01p01-ch1sk1fk1fl1.tiff
A4_F2R2	A4	Plate 5	IDH3B_Intron2_1	IDH3B	1	49	25	>4	4	2	FAM129B	FAM129B_Intron6_1	1	Plate5_r01c04f01p01-ch1sk1fk1fl1.tiff
A4_F2R2	A4	Plate 5	DPYSL2_Intron7_1	DPYSL2	1	116	25	>4	4	0.9	FAM129B	FAM129B_Intron6_1	1	Plate5_r01c04f01p01-ch1sk1fk1fl1.tiff
A4_F2R3	A4	Plate 8	COX5B_Intron2_2	COX5B	6	11	14	1	42.9	54.5				Plate8_r01c04f01p01-ch1sk1fk1fl1.tiff
A4_F2R3	A4	Plate 8	RUVBL1_Intron2_1	RUVBL1	4	80	14	2	28.6	5				Plate8_r01c04f01p01-ch1sk1fk1fl1.tiff
A4_F2R3	A4	Plate 8	UNG_Intron1_1	UNG	1	8	14	3	7.1	12.5				Plate8_r01c04f01p01-ch1sk1fk1fl1.tiff
A4_F2R3	A4	Plate 8	TXNDC9_Intron2_1	TXNDC9	1	32	14	4	7.1	3.1				Plate8_r01c04f01p01-ch1sk1fk1fl1.tiff
A4_F2R3	A4	Plate 8	TARS_Intron1_1	TARS	1	86	14	>4	7.1	1.2				Plate8_r01c04f01p01-ch1sk1fk1fl1.tiff
A4_F2R3	A4	Plate 8	IDH1_Intron4_2	IDH1	1	104	14	>4	7.1	1				Plate8_r01c04f01p01-ch1sk1fk1fl1.tiff
A4_F3R1	A4	Plate 3	AKR1C2_Intron5_1	AKR1C2	15	30	24	1	62.5	50	AKR1C2	AKR1C2_Intron5_1	1	Plate3_r01c04f01p01-ch1sk1fk1fl1.tiff
A4_F3R1	A4	Plate 3	PIK3C3_Intron8_1	PIK3C3	1	7	24	2	4.2	14.3	AKR1C2	AKR1C2_Intron5_1	1	Plate3_r01c04f01p01-ch1sk1fk1fl1.tiff
A4_F3R1	A4	Plate 3	PLOD1_Intron7_1	PLOD1	1	9	24	3	4.2	11.1	AKR1C2	AKR1C2_Intron5_1	1	Plate3_r01c04f01p01-ch1sk1fk1fl1.tiff
A4_F3R1	A4	Plate 3	CAT_Intron1_1	CAT	1	102	24	4	4.2	1	AKR1C2	AKR1C2_Intron5_1	1	Plate3_r01c04f01p01-ch1sk1fk1fl1.tiff
A4_F3R1	A4	Plate 3	GSR_Intron4_1	GSR	1	82	24	>4	4.2	1.2	AKR1C2	AKR1C2_Intron5_1	1	Plate3_r01c04f01p01-ch1sk1fk1fl1.tiff
A4_F3R1	A4	Plate 3	SET_Intron6_1	SET	1	39	24	>4	4.2	2.6	AKR1C2	AKR1C2_Intron5_1	1	Plate3_r01c04f01p01-ch1sk1fk1fl1.tiff
A4_F3R1	A4	Plate 3	FASN_Intron22_1	FASN	1	55	24	>4	4.2	1.8	AKR1C2	AKR1C2_Intron5_1	1	Plate3_r01c04f01p01-ch1sk1fk1fl1.tiff
A4_F3R1	A4	Plate 3	SREBF1_Intron7_1	SREBF1	1	15	24	>4	4.2	6.7	AKR1C2	AKR1C2_Intron5_1	1	Plate3_r01c04f01p01-ch1sk1fk1fl1.tiff
A4_F3R1	A4	Plate 3	PARK7_Intron3_2	PARK7	1	14	24	>4	4.2	7.1	AKR1C2	AKR1C2_Intron5_1	1	Plate3_r01c04f01p01-ch1sk1fk1fl1.tiff
A4_F3R1	A4	Plate 3	PLCB1_Intron2_1	PLCB1	1	42	24	>4	4.2	2.4	AKR1C2	AKR1C2_Intron5_1	1	Plate3_r01c04f01p01-ch1sk1fk1fl1.tiff
A4_F3R2	A4	Plate 6	PARK7_Intron3_2	PARK7	8	14	23	1	34.8	57.1				Plate6_r01c04f01p01-ch1sk1fk1fl1.tiff
A4_F3R2	A4	Plate 6	ADH1C_Intron5_1	ADH1C	7	9	23	2	30.4	77.8				Plate6_r01c04f01p01-ch1sk1fk1fl1.tiff
A4_F3R2	A4	Plate 6	JADE3_Intron3_1	JADE3	2	14	23	3	8.7	14.3				Plate6_r01c04f01p01-ch1sk1fk1fl1.tiff
A4_F3R2	A4	Plate 6	SIN3A_Intron6_1	SIN3A	1	1	23	4	4.3	100				Plate6_r01c04f01p01-ch1sk1fk1fl1.tiff
A4_F3R2	A4	Plate 6	CDC73_Intron7_1	CDC73	1	17	23	>4	4.3	5.9				Plate6_r01c04f01p01-ch1sk1fk1fl1.tiff
A4_F3R2	A4	Plate 6	PLA2G16_Intron3_1	PLA2G16	1	9	23	>4	4.3	11.1				Plate6_r01c04f01p01-ch1sk1fk1fl1.tiff
A4_F3R2	A4	Plate 6	NDUFB11_Intron1_2	NDUFB11	1	7	23	>4	4.3	14.3				Plate6_r01c04f01p01-ch1sk1fk1fl1.tiff
A4_F3R2	A4	Plate 6	DOT1L_Intron4_1	DOT1L	1	85	23	>4	4.3	1.2				Plate6_r01c04f01p01-ch1sk1fk1fl1.tiff
A4_F3R2	A4	Plate 6	HADHA_Intron15_1	HADHA	1	59	23	>4	4.3	1.7				Plate6_r01c04f01p01-ch1sk1fk1fl1.tiff
A4_F3R3	A4	Plate 9	PNPO_Intron1_2	PNPO	1	52	1	1	100	1.9
A5_F1R1	A5	Plate 1	PRIM1_Intron5_1	PRIM1	51	62	63	1	81	82.3	PRIM1	PRIM1_Intron5_1	1	Plate1_r01c05f01p01-ch1sk1fk1fl1.tiff
A5_F1R1	A5	Plate 1	OAS3_Intron15_1	OAS3	4	39	63	2	6.3	10.3	PRIM1	PRIM1_Intron5_1	1	Plate1_r01c05f01p01-ch1sk1fk1fl1.tiff
A5_F1R1	A5	Plate 1	NDUFAF8_Intron1_1	NDUFAF8	1	26	63	3	1.6	3.8	PRIM1	PRIM1_Intron5_1	1	Plate1_r01c05f01p01-ch1sk1fk1fl1.tiff
A5_F1R1	A5	Plate 1	RNF8_Intron1_1	RNF8	1	62	63	4	1.6	1.6	PRIM1	PRIM1_Intron5_1	1	Plate1_r01c05f01p01-ch1sk1fk1fl1.tiff
A5_F1R1	A5	Plate 1	ABHD11_Intron3_2	ABHD11	1	21	63	>4	1.6	4.8	PRIM1	PRIM1_Intron5_1	1	Plate1_r01c05f01p01-ch1sk1fk1fl1.tiff
A5_F1R1	A5	Plate 1	OXA1L_Intron1_1	OXA1L	1	74	63	>4	1.6	1.4	PRIM1	PRIM1_Intron5_1	1	Plate1_r01c05f01p01-ch1sk1fk1fl1.tiff
A5_F1R1	A5	Plate 1	PPIF_Intron3_1	PPIF	1	52	63	>4	1.6	1.9	PRIM1	PRIM1_Intron5_1	1	Plate1_r01c05f01p01-ch1sk1fk1fl1.tiff
A5_F1R1	A5	Plate 1	PDE9A_Intron16_1	PDE9A	1	42	63	>4	1.6	2.4	PRIM1	PRIM1_Intron5_1	1	Plate1_r01c05f01p01-ch1sk1fk1fl1.tiff
A5_F1R1	A5	Plate 1	ACLY_Intron22_1	ACLY	1	140	63	>4	1.6	0.7	PRIM1	PRIM1_Intron5_1	1	Plate1_r01c05f01p01-ch1sk1fk1fl1.tiff
A5_F1R1	A5	Plate 1	MBD3_Intron2_1	MBD3	1	9	63	>4	1.6	11.1	PRIM1	PRIM1_Intron5_1	1	Plate1_r01c05f01p01-ch1sk1fk1fl1.tiff
A5_F1R2	A5	Plate 4	CDC73_Intron7_1	CDC73	16	17	25	1	64	94.1	CDC73	CDC73_Intron7_1	1	Plate4_r01c05f01p01-ch1sk1fk1fl1.tiff
A5_F1R2	A5	Plate 4	ALG3_Intron3_2	ALG3	1	15	25	2	4	6.7	CDC73	CDC73_Intron7_1	1	Plate4_r01c05f01p01-ch1sk1fk1fl1.tiff
A5_F1R2	A5	Plate 4	RARS_Intron3_1	RARS	1	1	25	3	4	100	CDC73	CDC73_Intron7_1	1	Plate4_r01c05f01p01-ch1sk1fk1fl1.tiff
A5_F1R2	A5	Plate 4	TIGAR_Intron4_1	TIGAR	1	43	25	4	4	2.3	CDC73	CDC73_Intron7_1	1	Plate4_r01c05f01p01-ch1sk1fk1fl1.tiff
A5_F1R2	A5	Plate 4	VPS29_Intron2_2	VPS29	1	1	25	>4	4	100	CDC73	CDC73_Intron7_1	1	Plate4_r01c05f01p01-ch1sk1fk1fl1.tiff
A5_F1R2	A5	Plate 4	NDUFV1_Intron1_1	NDUFV1	1	1	25	>4	4	100	CDC73	CDC73_Intron7_1	1	Plate4_r01c05f01p01-ch1sk1fk1fl1.tiff
A5_F1R2	A5	Plate 4	VPS4B_Intron1_1	VPS4B	1	84	25	>4	4	1.2	CDC73	CDC73_Intron7_1	1	Plate4_r01c05f01p01-ch1sk1fk1fl1.tiff
A5_F1R2	A5	Plate 4	P4HB_Intron6_1	P4HB	1	103	25	>4	4	1	CDC73	CDC73_Intron7_1	1	Plate4_r01c05f01p01-ch1sk1fk1fl1.tiff
A5_F1R2	A5	Plate 4	AGPS_Intron13_1	AGPS	1	21	25	>4	4	4.8	CDC73	CDC73_Intron7_1	1	Plate4_r01c05f01p01-ch1sk1fk1fl1.tiff
A5_F1R2	A5	Plate 4	IDH3A_Intron2_1	IDH3A	1	59	25	>4	4	1.7	CDC73	CDC73_Intron7_1	1	Plate4_r01c05f01p01-ch1sk1fk1fl1.tiff
A5_F1R3	A5	Plate 7	IDH1_Intron4_2	IDH1	19	104	25	1	76	18.3	IDH1	IDH1_Intron4_2	1	Plate7_r01c05f01p01-ch1sk1fk1fl1.tiff
A5_F1R3	A5	Plate 7	MAT2B_Intron6_1	MAT2B	2	44	25	2	8	4.5	IDH1	IDH1_Intron4_2	1	Plate7_r01c05f01p01-ch1sk1fk1fl1.tiff
A5_F1R3	A5	Plate 7	ENO1_Intron6_2	ENO1	1	22	25	3	4	4.5	IDH1	IDH1_Intron4_2	1	Plate7_r01c05f01p01-ch1sk1fk1fl1.tiff
A5_F1R3	A5	Plate 7	AGL_Intron26_1	AGL	1	32	25	4	4	3.1	IDH1	IDH1_Intron4_2	1	Plate7_r01c05f01p01-ch1sk1fk1fl1.tiff
A5_F1R3	A5	Plate 7	NXN_Intron7_1	NXN	1	85	25	>4	4	1.2	IDH1	IDH1_Intron4_2	1	Plate7_r01c05f01p01-ch1sk1fk1fl1.tiff
A5_F1R3	A5	Plate 7	UQCRC2_Intron11_1	UQCRC2	1	86	25	>4	4	1.2	IDH1	IDH1_Intron4_2	1	Plate7_r01c05f01p01-ch1sk1fk1fl1.tiff
A5_F2R1	A5	Plate 2	DARS2_Intron9_1	DARS2	46	80	58	1	79.3	57.5	DARS2	DARS2_Intron9_1	1	Plate2_r01c05f01p01-ch1sk1fk1fl1.tiff
A5_F2R1	A5	Plate 2	LACTB2_Intron5_1	LACTB2	1	1	58	2	1.7	100	DARS2	DARS2_Intron9_1	1	Plate2_r01c05f01p01-ch1sk1fk1fl1.tiff
A5_F2R1	A5	Plate 2	ITGAV_Intron3_1	ITGAV	1	65	58	3	1.7	1.5	DARS2	DARS2_Intron9_1	1	Plate2_r01c05f01p01-ch1sk1fk1fl1.tiff
A5_F2R1	A5	Plate 2	FUBP3_Intron7_1	FUBP3	1	15	58	4	1.7	6.7	DARS2	DARS2_Intron9_1	1	Plate2_r01c05f01p01-ch1sk1fk1fl1.tiff
A5_F2R1	A5	Plate 2	NDUFA10_Intron5_1	NDUFA10	1	26	58	>4	1.7	3.8	DARS2	DARS2_Intron9_1	1	Plate2_r01c05f01p01-ch1sk1fk1fl1.tiff
A5_F2R1	A5	Plate 2	AKR1C2_Intron5_1	AKR1C2	1	30	58	>4	1.7	3.3	DARS2	DARS2_Intron9_1	1	Plate2_r01c05f01p01-ch1sk1fk1fl1.tiff
A5_F2R1	A5	Plate 2	CYB5R3_Intron2_1	CYB5R3	1	270	58	>4	1.7	0.4	DARS2	DARS2_Intron9_1	1	Plate2_r01c05f01p01-ch1sk1fk1fl1.tiff
A5_F2R1	A5	Plate 2	CUL4B_Intron20_1	CUL4B	1	94	58	>4	1.7	1.1	DARS2	DARS2_Intron9_1	1	Plate2_r01c05f01p01-ch1sk1fk1fl1.tiff
A5_F2R1	A5	Plate 2	GMPS_Intron10_1	GMPS	1	21	58	>4	1.7	4.8	DARS2	DARS2_Intron9_1	1	Plate2_r01c05f01p01-ch1sk1fk1fl1.tiff
A5_F2R1	A5	Plate 2	GLOD4_Intron1_1	GLOD4	1	42	58	>4	1.7	2.4	DARS2	DARS2_Intron9_1	1	Plate2_r01c05f01p01-ch1sk1fk1fl1.tiff
A5_F2R1	A5	Plate 2	PDE9A_Intron16_1	PDE9A	1	42	58	>4	1.7	2.4	DARS2	DARS2_Intron9_1	1	Plate2_r01c05f01p01-ch1sk1fk1fl1.tiff
A5_F2R1	A5	Plate 2	EPHX2_Intron6_1	EPHX2	1	25	58	>4	1.7	4	DARS2	DARS2_Intron9_1	1	Plate2_r01c05f01p01-ch1sk1fk1fl1.tiff
A5_F2R1	A5	Plate 2	GARS_Intron1_1	GARS	1	62	58	>4	1.7	1.6	DARS2	DARS2_Intron9_1	1	Plate2_r01c05f01p01-ch1sk1fk1fl1.tiff
A5_F2R2	A5	Plate 5	NDUFA8_Intron1_2	NDUFA8	16	39	30	1	53.3	41	NDUFA8	NDUFA8_Intron1_2	1	Plate5_r01c05f01p01-ch1sk1fk1fl1.tiff
A5_F2R2	A5	Plate 5	AMD1_Intron6_1	AMD1	7	10	30	2	23.3	70	NDUFA8	NDUFA8_Intron1_2	1	Plate5_r01c05f01p01-ch1sk1fk1fl1.tiff
A5_F2R2	A5	Plate 5	HSD17B10_Intron2_1	HSD17B10	1	12	30	3	3.3	8.3	NDUFA8	NDUFA8_Intron1_2	1	Plate5_r01c05f01p01-ch1sk1fk1fl1.tiff
A5_F2R2	A5	Plate 5	SDHA_Intron14_1	SDHA	1	56	30	4	3.3	1.8	NDUFA8	NDUFA8_Intron1_2	1	Plate5_r01c05f01p01-ch1sk1fk1fl1.tiff
A5_F2R2	A5	Plate 5	GSS_Intron2_1	GSS	1	47	30	>4	3.3	2.1	NDUFA8	NDUFA8_Intron1_2	1	Plate5_r01c05f01p01-ch1sk1fk1fl1.tiff
A5_F2R2	A5	Plate 5	CYB5R3_Intron2_1	CYB5R3	1	270	30	>4	3.3	0.4	NDUFA8	NDUFA8_Intron1_2	1	Plate5_r01c05f01p01-ch1sk1fk1fl1.tiff
A5_F2R2	A5	Plate 5	MAOB_Intron4_1	MAOB	1	36	30	>4	3.3	2.8	NDUFA8	NDUFA8_Intron1_2	1	Plate5_r01c05f01p01-ch1sk1fk1fl1.tiff
A5_F2R2	A5	Plate 5	FAM129B_Intron6_1	FAM129B	1	35	30	>4	3.3	2.9	NDUFA8	NDUFA8_Intron1_2	1	Plate5_r01c05f01p01-ch1sk1fk1fl1.tiff
A5_F2R2	A5	Plate 5	HADHA_Intron15_1	HADHA	1	59	30	>4	3.3	1.7	NDUFA8	NDUFA8_Intron1_2	1	Plate5_r01c05f01p01-ch1sk1fk1fl1.tiff
A5_F2R3	A5	Plate 8	TARS_Intron9_1	TARS	8	22	16	1	50	36.4				Plate8_r01c05f01p01-ch1sk1fk1fl1.tiff
A5_F2R3	A5	Plate 8	ADSL_Intron2_1	ADSL	4	9	16	2	25	44.4				Plate8_r01c05f01p01-ch1sk1fk1fl1.tiff
A5_F2R3	A5	Plate 8	PLA2G4F_Intron9_1	PLA2G4F	1	8	16	3	6.3	12.5				Plate8_r01c05f01p01-ch1sk1fk1fl1.tiff
A5_F2R3	A5	Plate 8	ANGPTL4_Intron1_1	ANGPTL4	1	33	16	4	6.3	3				Plate8_r01c05f01p01-ch1sk1fk1fl1.tiff
A5_F2R3	A5	Plate 8	NDUFA8_Intron1_2	NDUFA8	1	39	16	>4	6.3	2.6				Plate8_r01c05f01p01-ch1sk1fk1fl1.tiff
A5_F2R3	A5	Plate 8	MAT2B_Intron6_1	MAT2B	1	44	16	>4	6.3	2.3				Plate8_r01c05f01p01-ch1sk1fk1fl1.tiff
A5_F3R1	A5	Plate 3	QDPR_Intron1_2	QDPR	2	22	7	1	28.6	9.1				Plate3_r01c05f01p01-ch1sk1fk1fl1.tiff
A5_F3R1	A5	Plate 3	GSR_Intron8_1	GSR	1	11	7	2	14.3	9.1				Plate3_r01c05f01p01-ch1sk1fk1fl1.tiff
A5_F3R1	A5	Plate 3	DARS2_Intron9_1	DARS2	1	80	7	3	14.3	1.3				Plate3_r01c05f01p01-ch1sk1fk1fl1.tiff
A5_F3R1	A5	Plate 3	MTR_Intron2_1	MTR	1	13	7	4	14.3	7.7				Plate3_r01c05f01p01-ch1sk1fk1fl1.tiff
A5_F3R1	A5	Plate 3	GARS_Intron6_1	GARS	1	20	7	>4	14.3	5				Plate3_r01c05f01p01-ch1sk1fk1fl1.tiff
A5_F3R1	A5	Plate 3	CUL4B_Intron20_1	CUL4B	1	94	7	>4	14.3	1.1				Plate3_r01c05f01p01-ch1sk1fk1fl1.tiff
A5_F3R2	A5	Plate 6	JADE3_Intron3_1	JADE3	6	14	10	1	60	42.9	JADE3	JADE3_Intron3_1	1	Plate6_r01c05f01p01-ch1sk1fk1fl1.tiff
A5_F3R2	A5	Plate 6	SET_Intron4_1	SET	1	40	10	2	10	2.5	JADE3	JADE3_Intron3_1	1	Plate6_r01c05f01p01-ch1sk1fk1fl1.tiff
A5_F3R2	A5	Plate 6	PPOX_Intron2_1	PPOX	1	50	10	3	10	2	JADE3	JADE3_Intron3_1	1	Plate6_r01c05f01p01-ch1sk1fk1fl1.tiff
A5_F3R2	A5	Plate 6	TARS_Intron1_1	TARS	1	86	10	4	10	1.2	JADE3	JADE3_Intron3_1	1	Plate6_r01c05f01p01-ch1sk1fk1fl1.tiff
A5_F3R2	A5	Plate 6	PARK7_Intron4_2	PARK7	1	139	10	>4	10	0.7	JADE3	JADE3_Intron3_1	1	Plate6_r01c05f01p01-ch1sk1fk1fl1.tiff
A5_F3R3	A5	Plate 9	NSUN2_Intron1_1	NSUN2	1	20	1	1	100	5
A6_F1R1	A6	Plate 1	LARS2_Intron4_1	LARS2	70	98	90	1	77.8	71.4	LARS2	LARS2_Intron4_1	1	Plate1_r01c06f01p01-ch1sk1fk1fl1.tiff
A6_F1R1	A6	Plate 1	OAS3_Intron15_1	OAS3	3	39	90	2	3.3	7.7	LARS2	LARS2_Intron4_1	1	Plate1_r01c06f01p01-ch1sk1fk1fl1.tiff
A6_F1R1	A6	Plate 1	FH_Intron3_1	FH	2	100	90	3	2.2	2	LARS2	LARS2_Intron4_1	1	Plate1_r01c06f01p01-ch1sk1fk1fl1.tiff
A6_F1R1	A6	Plate 1	GSR_Intron4_1	GSR	2	82	90	4	2.2	2.4	LARS2	LARS2_Intron4_1	1	Plate1_r01c06f01p01-ch1sk1fk1fl1.tiff
A6_F1R1	A6	Plate 1	TAF10_Intron2_2	TAF10	1	28	90	>4	1.1	3.6	LARS2	LARS2_Intron4_1	1	Plate1_r01c06f01p01-ch1sk1fk1fl1.tiff
A6_F1R1	A6	Plate 1	NUDT14_Intron1_1	NUDT14	1	61	90	>4	1.1	1.6	LARS2	LARS2_Intron4_1	1	Plate1_r01c06f01p01-ch1sk1fk1fl1.tiff
A6_F1R1	A6	Plate 1	EZH2_Intron4_1	EZH2	1	90	90	>4	1.1	1.1	LARS2	LARS2_Intron4_1	1	Plate1_r01c06f01p01-ch1sk1fk1fl1.tiff
A6_F1R1	A6	Plate 1	CYP7A1_Intron2_2	CYP7A1	1	82	90	>4	1.1	1.2	LARS2	LARS2_Intron4_1	1	Plate1_r01c06f01p01-ch1sk1fk1fl1.tiff
A6_F1R1	A6	Plate 1	AKR1C2_Intron5_1	AKR1C2	1	30	90	>4	1.1	3.3	LARS2	LARS2_Intron4_1	1	Plate1_r01c06f01p01-ch1sk1fk1fl1.tiff
A6_F1R1	A6	Plate 1	PPA1_Intron3_1	PPA1	1	27	90	>4	1.1	3.7	LARS2	LARS2_Intron4_1	1	Plate1_r01c06f01p01-ch1sk1fk1fl1.tiff
A6_F1R1	A6	Plate 1	OAT_Intron6_1	OAT	1	121	90	>4	1.1	0.8	LARS2	LARS2_Intron4_1	1	Plate1_r01c06f01p01-ch1sk1fk1fl1.tiff
A6_F1R1	A6	Plate 1	NXN_Intron7_1	NXN	1	85	90	>4	1.1	1.2	LARS2	LARS2_Intron4_1	1	Plate1_r01c06f01p01-ch1sk1fk1fl1.tiff
A6_F1R1	A6	Plate 1	ATAD3B_Intron7_1	ATAD3B	1	31	90	>4	1.1	3.2	LARS2	LARS2_Intron4_1	1	Plate1_r01c06f01p01-ch1sk1fk1fl1.tiff
A6_F1R1	A6	Plate 1	TARS_Intron1_1	TARS	1	86	90	>4	1.1	1.2	LARS2	LARS2_Intron4_1	1	Plate1_r01c06f01p01-ch1sk1fk1fl1.tiff
A6_F1R1	A6	Plate 1	NDUFA10_Intron9_1	NDUFA10	1	50	90	>4	1.1	2	LARS2	LARS2_Intron4_1	1	Plate1_r01c06f01p01-ch1sk1fk1fl1.tiff
A6_F1R1	A6	Plate 1	TYMS_Intron4_1	TYMS	1	21	90	>4	1.1	4.8	LARS2	LARS2_Intron4_1	1	Plate1_r01c06f01p01-ch1sk1fk1fl1.tiff
A6_F1R1	A6	Plate 1	PLCB1_Intron2_1	PLCB1	1	42	90	>4	1.1	2.4	LARS2	LARS2_Intron4_1	1	Plate1_r01c06f01p01-ch1sk1fk1fl1.tiff
A6_F1R2	A6	Plate 4	GFPT1_Intron13_1	GFPT1	15	29	40	1	37.5	51.7	GFPT1;LPGAT1	GFPT1_Intron13_1;LPGAT1_Intron4_1	2	Plate4_r01c06f01p01-ch1sk1fk1fl1.tiff
A6_F1R2	A6	Plate 4	LPGAT1_Intron4_1	LPGAT1	14	21	40	2	35	66.7	GFPT1;LPGAT1	GFPT1_Intron13_1;LPGAT1_Intron4_1	2	Plate4_r01c06f01p01-ch1sk1fk1fl1.tiff
A6_F1R2	A6	Plate 4	UNG_Intron1_1	UNG	1	8	40	3	2.5	12.5	GFPT1;LPGAT1	GFPT1_Intron13_1;LPGAT1_Intron4_1	2	Plate4_r01c06f01p01-ch1sk1fk1fl1.tiff
A6_F1R2	A6	Plate 4	SHMT2_Intron2_1	SHMT2	1	21	40	4	2.5	4.8	GFPT1;LPGAT1	GFPT1_Intron13_1;LPGAT1_Intron4_1	2	Plate4_r01c06f01p01-ch1sk1fk1fl1.tiff
A6_F1R2	A6	Plate 4	HMBS_Intron1_1	HMBS	1	1	40	>4	2.5	100	GFPT1;LPGAT1	GFPT1_Intron13_1;LPGAT1_Intron4_1	2	Plate4_r01c06f01p01-ch1sk1fk1fl1.tiff
A6_F1R2	A6	Plate 4	COX7A2_Intron2_1	COX7A2	1	31	40	>4	2.5	3.2	GFPT1;LPGAT1	GFPT1_Intron13_1;LPGAT1_Intron4_1	2	Plate4_r01c06f01p01-ch1sk1fk1fl1.tiff
A6_F1R2	A6	Plate 4	CHST13_Intron2_1	CHST13	1	21	40	>4	2.5	4.8	GFPT1;LPGAT1	GFPT1_Intron13_1;LPGAT1_Intron4_1	2	Plate4_r01c06f01p01-ch1sk1fk1fl1.tiff
A6_F1R2	A6	Plate 4	DPYSL2_Intron7_1	DPYSL2	1	116	40	>4	2.5	0.9	GFPT1;LPGAT1	GFPT1_Intron13_1;LPGAT1_Intron4_1	2	Plate4_r01c06f01p01-ch1sk1fk1fl1.tiff
A6_F1R2	A6	Plate 4	UBE2N_Intron1_2	UBE2N	1	57	40	>4	2.5	1.8	GFPT1;LPGAT1	GFPT1_Intron13_1;LPGAT1_Intron4_1	2	Plate4_r01c06f01p01-ch1sk1fk1fl1.tiff
A6_F1R2	A6	Plate 4	RUVBL1_Intron6_1	RUVBL1	1	10	40	>4	2.5	10	GFPT1;LPGAT1	GFPT1_Intron13_1;LPGAT1_Intron4_1	2	Plate4_r01c06f01p01-ch1sk1fk1fl1.tiff
A6_F1R2	A6	Plate 4	FAM129B_Intron6_1	FAM129B	1	35	40	>4	2.5	2.9	GFPT1;LPGAT1	GFPT1_Intron13_1;LPGAT1_Intron4_1	2	Plate4_r01c06f01p01-ch1sk1fk1fl1.tiff
A6_F1R2	A6	Plate 4	SIRT1_Intron4_2	SIRT1	1	5	40	>4	2.5	20	GFPT1;LPGAT1	GFPT1_Intron13_1;LPGAT1_Intron4_1	2	Plate4_r01c06f01p01-ch1sk1fk1fl1.tiff
A6_F1R2	A6	Plate 4	IDH3A_Intron2_1	IDH3A	1	59	40	>4	2.5	1.7	GFPT1;LPGAT1	GFPT1_Intron13_1;LPGAT1_Intron4_1	2	Plate4_r01c06f01p01-ch1sk1fk1fl1.tiff
A6_F1R3	A6	Plate 7	RPA2_Intron3_1	RPA2	3	34	13	1	23.1	8.8				Plate7_r01c06f01p01-ch1sk1fk1fl1.tiff
A6_F1R3	A6	Plate 7	SDHB_Intron7_1	SDHB	2	30	13	2	15.4	6.7				Plate7_r01c06f01p01-ch1sk1fk1fl1.tiff
A6_F1R3	A6	Plate 7	PRDX3_Intron6_2	PRDX3	1	17	13	3	7.7	5.9				Plate7_r01c06f01p01-ch1sk1fk1fl1.tiff
A6_F1R3	A6	Plate 7	RPA1_Intron8_1	RPA1	1	42	13	4	7.7	2.4				Plate7_r01c06f01p01-ch1sk1fk1fl1.tiff
A6_F1R3	A6	Plate 7	TARS_Intron9_1	TARS	1	22	13	>4	7.7	4.5				Plate7_r01c06f01p01-ch1sk1fk1fl1.tiff
A6_F1R3	A6	Plate 7	MTHFD1_Intron26_2	MTHFD1	1	38	13	>4	7.7	2.6				Plate7_r01c06f01p01-ch1sk1fk1fl1.tiff
A6_F1R3	A6	Plate 7	UBE2N_Intron1_2	UBE2N	1	57	13	>4	7.7	1.8				Plate7_r01c06f01p01-ch1sk1fk1fl1.tiff
A6_F1R3	A6	Plate 7	NXN_Intron7_1	NXN	1	85	13	>4	7.7	1.2				Plate7_r01c06f01p01-ch1sk1fk1fl1.tiff
A6_F1R3	A6	Plate 7	PANK3_Intron2_1	PANK3	1	47	13	>4	7.7	2.1				Plate7_r01c06f01p01-ch1sk1fk1fl1.tiff
A6_F1R3	A6	Plate 7	RLF_Intron7_1	RLF	1	43	13	>4	7.7	2.3				Plate7_r01c06f01p01-ch1sk1fk1fl1.tiff
A6_F2R1	A6	Plate 2	WDR82_Intron6_1	WDR82	12	17	16	1	75	70.6	WDR82	WDR82_Intron6_1	1	Plate2_r01c06f01p01-ch1sk1fk1fl1.tiff
A6_F2R1	A6	Plate 2	OAS3_Intron15_1	OAS3	1	39	16	2	6.3	2.6	WDR82	WDR82_Intron6_1	1	Plate2_r01c06f01p01-ch1sk1fk1fl1.tiff
A6_F2R1	A6	Plate 2	CTNNB1_Intron4_1	CTNNB1	1	70	16	3	6.3	1.4	WDR82	WDR82_Intron6_1	1	Plate2_r01c06f01p01-ch1sk1fk1fl1.tiff
A6_F2R1	A6	Plate 2	HUWE1_Intron8_1	HUWE1	1	142	16	4	6.3	0.7	WDR82	WDR82_Intron6_1	1	Plate2_r01c06f01p01-ch1sk1fk1fl1.tiff
A6_F2R1	A6	Plate 2	MBD3_Intron2_1	MBD3	1	9	16	>4	6.3	11.1	WDR82	WDR82_Intron6_1	1	Plate2_r01c06f01p01-ch1sk1fk1fl1.tiff
A6_F2R2	A6	Plate 5	DPYSL2_Intron7_1	DPYSL2	2	116	5	1	40	1.7				Plate5_r01c06f01p01-ch1sk1fk1fl1.tiff
A6_F2R2	A6	Plate 5	NXN_Intron3_1	NXN	2	51	5	2	40	3.9				Plate5_r01c06f01p01-ch1sk1fk1fl1.tiff
A6_F2R2	A6	Plate 5	PARK7_Intron4_2	PARK7	1	139	5	3	20	0.7				Plate5_r01c06f01p01-ch1sk1fk1fl1.tiff
A6_F2R3	A6	Plate 8	OXA1L_Intron1_1	OXA1L	2	74	3	1	66.7	2.7				Plate8_r01c06f01p01-ch1sk1fk1fl1.tiff
A6_F2R3	A6	Plate 8	OXCT1_Intron1_1	OXCT1	1	34	3	2	33.3	2.9				Plate8_r01c06f01p01-ch1sk1fk1fl1.tiff
A6_F3R1	A6	Plate 3	GMPS_Intron10_1	GMPS	15	21	33	1	45.5	71.4	GMPS;GARS	GMPS_Intron10_1;GARS_Intron6_1	2	Plate3_r01c06f01p01-ch1sk1fk1fl1.tiff
A6_F3R1	A6	Plate 3	GARS_Intron6_1	GARS	14	20	33	2	42.4	70	GMPS;GARS	GMPS_Intron10_1;GARS_Intron6_1	2	Plate3_r01c06f01p01-ch1sk1fk1fl1.tiff
A6_F3R1	A6	Plate 3	GSR_Intron4_1	GSR	1	82	33	3	3	1.2	GMPS;GARS	GMPS_Intron10_1;GARS_Intron6_1	2	Plate3_r01c06f01p01-ch1sk1fk1fl1.tiff
A6_F3R1	A6	Plate 3	BAZ1B_Intron5_1	BAZ1B	1	18	33	4	3	5.6	GMPS;GARS	GMPS_Intron10_1;GARS_Intron6_1	2	Plate3_r01c06f01p01-ch1sk1fk1fl1.tiff
A6_F3R1	A6	Plate 3	MUT_Intron3_1	MUT	1	43	33	>4	3	2.3	GMPS;GARS	GMPS_Intron10_1;GARS_Intron6_1	2	Plate3_r01c06f01p01-ch1sk1fk1fl1.tiff
A6_F3R1	A6	Plate 3	CS_Intron10_1	CS	1	66	33	>4	3	1.5	GMPS;GARS	GMPS_Intron10_1;GARS_Intron6_1	2	Plate3_r01c06f01p01-ch1sk1fk1fl1.tiff
A6_F3R2	A6	Plate 6	TARS_Intron1_1	TARS	13	86	26	1	50	15.1	TARS	TARS_Intron1_1	1	Plate6_r01c06f01p01-ch1sk1fk1fl1.tiff
A6_F3R2	A6	Plate 6	RTN4IP1_Intron3_1	RTN4IP1	10	20	26	2	38.5	50	TARS	TARS_Intron1_1	1	Plate6_r01c06f01p01-ch1sk1fk1fl1.tiff
A6_F3R2	A6	Plate 6	ALDH18A1_Intron12_1	ALDH18A1	1	49	26	3	3.8	2	TARS	TARS_Intron1_1	1	Plate6_r01c06f01p01-ch1sk1fk1fl1.tiff
A6_F3R2	A6	Plate 6	JADE3_Intron3_1	JADE3	1	14	26	4	3.8	7.1	TARS	TARS_Intron1_1	1	Plate6_r01c06f01p01-ch1sk1fk1fl1.tiff
A6_F3R2	A6	Plate 6	AGPS_Intron13_1	AGPS	1	21	26	>4	3.8	4.8	TARS	TARS_Intron1_1	1	Plate6_r01c06f01p01-ch1sk1fk1fl1.tiff
A6_F3R3	A6	Plate 9	BCAT2_Intron2_1	BCAT2	1	39	2	1	50	2.6
A6_F3R3	A6	Plate 9	NXN_Intron7_1	NXN	1	85	2	2	50	1.2
A7_F1R1	A7	Plate 1	FASN_Intron22_1	FASN	8	55	19	1	42.1	14.5				Plate1_r01c07f01p01-ch1sk1fk1fl1.tiff
A7_F1R1	A7	Plate 1	ANGPTL4_Intron1_1	ANGPTL4	3	33	19	2	15.8	9.1				Plate1_r01c07f01p01-ch1sk1fk1fl1.tiff
A7_F1R1	A7	Plate 1	EPHX2_Intron6_1	EPHX2	3	25	19	3	15.8	12				Plate1_r01c07f01p01-ch1sk1fk1fl1.tiff
A7_F1R1	A7	Plate 1	ALDH7A1_Intron1_1	ALDH7A1	1	81	19	4	5.3	1.2				Plate1_r01c07f01p01-ch1sk1fk1fl1.tiff
A7_F1R1	A7	Plate 1	DPYSL5_Intron11_1	DPYSL5	1	56	19	>4	5.3	1.8				Plate1_r01c07f01p01-ch1sk1fk1fl1.tiff
A7_F1R1	A7	Plate 1	FH_Intron5_1	FH	1	20	19	>4	5.3	5				Plate1_r01c07f01p01-ch1sk1fk1fl1.tiff
A7_F1R1	A7	Plate 1	GALNT6_Intron7_1	GALNT6	1	78	19	>4	5.3	1.3				Plate1_r01c07f01p01-ch1sk1fk1fl1.tiff
A7_F1R1	A7	Plate 1	OSBPL11_Intron12_1	OSBPL11	1	74	19	>4	5.3	1.4				Plate1_r01c07f01p01-ch1sk1fk1fl1.tiff
A7_F1R2	A7	Plate 4	PARK7_Intron4_2	PARK7	6	139	10	1	60	4.3	PARK7	PARK7_Intron4_2	1	Plate4_r01c07f01p01-ch1sk1fk1fl1.tiff
A7_F1R2	A7	Plate 4	FMR1_Intron3_1	FMR1	1	2	10	2	10	50	PARK7	PARK7_Intron4_2	1	Plate4_r01c07f01p01-ch1sk1fk1fl1.tiff
A7_F1R2	A7	Plate 4	ALDH7A1_Intron1_1	ALDH7A1	1	81	10	3	10	1.2	PARK7	PARK7_Intron4_2	1	Plate4_r01c07f01p01-ch1sk1fk1fl1.tiff
A7_F1R2	A7	Plate 4	RUVBL1_Intron6_1	RUVBL1	1	10	10	4	10	10	PARK7	PARK7_Intron4_2	1	Plate4_r01c07f01p01-ch1sk1fk1fl1.tiff
A7_F1R2	A7	Plate 4	GFPT1_Intron13_1	GFPT1	1	29	10	>4	10	3.4	PARK7	PARK7_Intron4_2	1	Plate4_r01c07f01p01-ch1sk1fk1fl1.tiff
A7_F1R3	A7	Plate 7	PTGIS_Intron2_1	PTGIS	2	2	6	1	33.3	100				Plate7_r01c07f01p01-ch1sk1fk1fl1.tiff
A7_F1R3	A7	Plate 7	CYP51A1_Intron1_1	CYP51A1	1	36	6	2	16.7	2.8				Plate7_r01c07f01p01-ch1sk1fk1fl1.tiff
A7_F1R3	A7	Plate 7	PSAT1_Intron1_2	PSAT1	1	52	6	3	16.7	1.9				Plate7_r01c07f01p01-ch1sk1fk1fl1.tiff
A7_F1R3	A7	Plate 7	MTHFD1_Intron22_2	MTHFD1	1	74	6	4	16.7	1.4				Plate7_r01c07f01p01-ch1sk1fk1fl1.tiff
A7_F1R3	A7	Plate 7	ACLY_Intron7_1	ACLY	1	68	6	>4	16.7	1.5				Plate7_r01c07f01p01-ch1sk1fk1fl1.tiff
A7_F2R1	A7	Plate 2	COX6C_Intron2_2	COX6C	44	74	59	1	74.6	59.5	COX6C	COX6C_Intron2_2	1	Plate2_r01c07f01p01-ch1sk1fk1fl1.tiff
A7_F2R1	A7	Plate 2	CYB5R3_Intron2_1	CYB5R3	2	270	59	2	3.4	0.7	COX6C	COX6C_Intron2_2	1	Plate2_r01c07f01p01-ch1sk1fk1fl1.tiff
A7_F2R1	A7	Plate 2	TRMT6_Intron7_1	TRMT6	2	23	59	3	3.4	8.7	COX6C	COX6C_Intron2_2	1	Plate2_r01c07f01p01-ch1sk1fk1fl1.tiff
A7_F2R1	A7	Plate 2	ATIC_Intron11_1	ATIC	1	10	59	4	1.7	10	COX6C	COX6C_Intron2_2	1	Plate2_r01c07f01p01-ch1sk1fk1fl1.tiff
A7_F2R1	A7	Plate 2	NDUFS7_Intron4_1	NDUFS7	1	13	59	>4	1.7	7.7	COX6C	COX6C_Intron2_2	1	Plate2_r01c07f01p01-ch1sk1fk1fl1.tiff
A7_F2R1	A7	Plate 2	GLS_Intron13_1	GLS	1	39	59	>4	1.7	2.6	COX6C	COX6C_Intron2_2	1	Plate2_r01c07f01p01-ch1sk1fk1fl1.tiff
A7_F2R1	A7	Plate 2	CYP7A1_Intron2_2	CYP7A1	1	82	59	>4	1.7	1.2	COX6C	COX6C_Intron2_2	1	Plate2_r01c07f01p01-ch1sk1fk1fl1.tiff
A7_F2R1	A7	Plate 2	GSR_Intron4_1	GSR	1	82	59	>4	1.7	1.2	COX6C	COX6C_Intron2_2	1	Plate2_r01c07f01p01-ch1sk1fk1fl1.tiff
A7_F2R1	A7	Plate 2	SMYD1_Intron7_1	SMYD1	1	8	59	>4	1.7	12.5	COX6C	COX6C_Intron2_2	1	Plate2_r01c07f01p01-ch1sk1fk1fl1.tiff
A7_F2R1	A7	Plate 2	ATAD3A_Intron4_1	ATAD3A	1	185	59	>4	1.7	0.5	COX6C	COX6C_Intron2_2	1	Plate2_r01c07f01p01-ch1sk1fk1fl1.tiff
A7_F2R1	A7	Plate 2	PKM_Intron3_1	PKM	1	72	59	>4	1.7	1.4	COX6C	COX6C_Intron2_2	1	Plate2_r01c07f01p01-ch1sk1fk1fl1.tiff
A7_F2R1	A7	Plate 2	NDUFA10_Intron9_1	NDUFA10	1	50	59	>4	1.7	2	COX6C	COX6C_Intron2_2	1	Plate2_r01c07f01p01-ch1sk1fk1fl1.tiff
A7_F2R1	A7	Plate 2	ITPA_Intron1_2	ITPA	1	31	59	>4	1.7	3.2	COX6C	COX6C_Intron2_2	1	Plate2_r01c07f01p01-ch1sk1fk1fl1.tiff
A7_F2R1	A7	Plate 2	FH_Intron3_1	FH	1	100	59	>4	1.7	1	COX6C	COX6C_Intron2_2	1	Plate2_r01c07f01p01-ch1sk1fk1fl1.tiff
A7_F2R2	A7	Plate 5	SART3_Intron4_1	SART3	18	21	43	1	41.9	85.7	SART3;QSOX1	SART3_Intron4_1;QSOX1_Intron9_1	2	Plate5_r01c07f01p01-ch1sk1fk1fl1.tiff
A7_F2R2	A7	Plate 5	QSOX1_Intron9_1	QSOX1	16	21	43	2	37.2	76.2	SART3;QSOX1	SART3_Intron4_1;QSOX1_Intron9_1	2	Plate5_r01c07f01p01-ch1sk1fk1fl1.tiff
A7_F2R2	A7	Plate 5	HADHA_Intron15_1	HADHA	2	59	43	3	4.7	3.4	SART3;QSOX1	SART3_Intron4_1;QSOX1_Intron9_1	2	Plate5_r01c07f01p01-ch1sk1fk1fl1.tiff
A7_F2R2	A7	Plate 5	COX7A2_Intron2_1	COX7A2	1	31	43	4	2.3	3.2	SART3;QSOX1	SART3_Intron4_1;QSOX1_Intron9_1	2	Plate5_r01c07f01p01-ch1sk1fk1fl1.tiff
A7_F2R2	A7	Plate 5	UQCRC2_Intron11_1	UQCRC2	1	86	43	>4	2.3	1.2	SART3;QSOX1	SART3_Intron4_1;QSOX1_Intron9_1	2	Plate5_r01c07f01p01-ch1sk1fk1fl1.tiff
A7_F2R2	A7	Plate 5	DLAT_Intron4_1	DLAT	1	65	43	>4	2.3	1.5	SART3;QSOX1	SART3_Intron4_1;QSOX1_Intron9_1	2	Plate5_r01c07f01p01-ch1sk1fk1fl1.tiff
A7_F2R2	A7	Plate 5	TAF9B_Intron1_2	TAF9B	1	87	43	>4	2.3	1.1	SART3;QSOX1	SART3_Intron4_1;QSOX1_Intron9_1	2	Plate5_r01c07f01p01-ch1sk1fk1fl1.tiff
A7_F2R2	A7	Plate 5	DOT1L_Intron4_1	DOT1L	1	85	43	>4	2.3	1.2	SART3;QSOX1	SART3_Intron4_1;QSOX1_Intron9_1	2	Plate5_r01c07f01p01-ch1sk1fk1fl1.tiff
A7_F2R2	A7	Plate 5	FAM129B_Intron6_1	FAM129B	1	35	43	>4	2.3	2.9	SART3;QSOX1	SART3_Intron4_1;QSOX1_Intron9_1	2	Plate5_r01c07f01p01-ch1sk1fk1fl1.tiff
A7_F2R2	A7	Plate 5	GCKR_Intron15_1	GCKR	1	27	43	>4	2.3	3.7	SART3;QSOX1	SART3_Intron4_1;QSOX1_Intron9_1	2	Plate5_r01c07f01p01-ch1sk1fk1fl1.tiff
A7_F2R3	A7	Plate 8	RCOR1_Intron9_1	RCOR1	1	4	1	1	100	25
A7_F3R1	A7	Plate 3	PPA1_Intron3_1	PPA1	16	27	31	1	51.6	59.3	PPA1	PPA1_Intron3_1	1	Plate3_r01c07f01p01-ch1sk1fk1fl1.tiff
A7_F3R1	A7	Plate 3	FH_Intron3_1	FH	10	100	31	2	32.3	10	PPA1	PPA1_Intron3_1	1	Plate3_r01c07f01p01-ch1sk1fk1fl1.tiff
A7_F3R1	A7	Plate 3	GCLM_Intron2_2	GCLM	3	41	31	3	9.7	7.3	PPA1	PPA1_Intron3_1	1	Plate3_r01c07f01p01-ch1sk1fk1fl1.tiff
A7_F3R1	A7	Plate 3	GATAD2A_Intron7_1	GATAD2A	1	58	31	4	3.2	1.7	PPA1	PPA1_Intron3_1	1	Plate3_r01c07f01p01-ch1sk1fk1fl1.tiff
A7_F3R1	A7	Plate 3	GSR_Intron4_1	GSR	1	82	31	>4	3.2	1.2	PPA1	PPA1_Intron3_1	1	Plate3_r01c07f01p01-ch1sk1fk1fl1.tiff
A7_F3R2	A7	Plate 6	PYCR2_Intron2_1	PYCR2	20	26	25	1	80	76.9	PYCR2	PYCR2_Intron2_1	1	Plate6_r01c07f01p01-ch1sk1fk1fl1.tiff
A7_F3R2	A7	Plate 6	PMM2_Intron1_1	PMM2	1	6	25	2	4	16.7	PYCR2	PYCR2_Intron2_1	1	Plate6_r01c07f01p01-ch1sk1fk1fl1.tiff
A7_F3R2	A7	Plate 6	PDHB_Intron5_1	PDHB	1	22	25	3	4	4.5	PYCR2	PYCR2_Intron2_1	1	Plate6_r01c07f01p01-ch1sk1fk1fl1.tiff
A7_F3R2	A7	Plate 6	NXN_Intron7_1	NXN	1	85	25	4	4	1.2	PYCR2	PYCR2_Intron2_1	1	Plate6_r01c07f01p01-ch1sk1fk1fl1.tiff
A7_F3R2	A7	Plate 6	DOT1L_Intron4_1	DOT1L	1	85	25	>4	4	1.2	PYCR2	PYCR2_Intron2_1	1	Plate6_r01c07f01p01-ch1sk1fk1fl1.tiff
A7_F3R2	A7	Plate 6	GFPT1_Intron13_1	GFPT1	1	29	25	>4	4	3.4	PYCR2	PYCR2_Intron2_1	1	Plate6_r01c07f01p01-ch1sk1fk1fl1.tiff
A8_F1R1	A8	Plate 1	RNF8_Intron1_1	RNF8	49	62	63	1	77.8	79	RNF8	RNF8_Intron1_1	1	Plate1_r01c08f01p01-ch1sk1fk1fl1.tiff
A8_F1R1	A8	Plate 1	TXNDC5_Intron5_1	TXNDC5	1	63	63	2	1.6	1.6	RNF8	RNF8_Intron1_1	1	Plate1_r01c08f01p01-ch1sk1fk1fl1.tiff
A8_F1R1	A8	Plate 1	NDUFA10_Intron5_1	NDUFA10	1	26	63	3	1.6	3.8	RNF8	RNF8_Intron1_1	1	Plate1_r01c08f01p01-ch1sk1fk1fl1.tiff
A8_F1R1	A8	Plate 1	CYP7A1_Intron2_2	CYP7A1	1	82	63	4	1.6	1.2	RNF8	RNF8_Intron1_1	1	Plate1_r01c08f01p01-ch1sk1fk1fl1.tiff
A8_F1R1	A8	Plate 1	KMT5A_Intron2_1	KMT5A	1	141	63	>4	1.6	0.7	RNF8	RNF8_Intron1_1	1	Plate1_r01c08f01p01-ch1sk1fk1fl1.tiff
A8_F1R1	A8	Plate 1	PPA1_Intron3_1	PPA1	1	27	63	>4	1.6	3.7	RNF8	RNF8_Intron1_1	1	Plate1_r01c08f01p01-ch1sk1fk1fl1.tiff
A8_F1R1	A8	Plate 1	COX6C_Intron2_2	COX6C	1	74	63	>4	1.6	1.4	RNF8	RNF8_Intron1_1	1	Plate1_r01c08f01p01-ch1sk1fk1fl1.tiff
A8_F1R1	A8	Plate 1	DPYSL5_Intron11_1	DPYSL5	1	56	63	>4	1.6	1.8	RNF8	RNF8_Intron1_1	1	Plate1_r01c08f01p01-ch1sk1fk1fl1.tiff
A8_F1R1	A8	Plate 1	QARS_Intron3_1	QARS	1	36	63	>4	1.6	2.8	RNF8	RNF8_Intron1_1	1	Plate1_r01c08f01p01-ch1sk1fk1fl1.tiff
A8_F1R1	A8	Plate 1	NXN_Intron7_1	NXN	1	85	63	>4	1.6	1.2	RNF8	RNF8_Intron1_1	1	Plate1_r01c08f01p01-ch1sk1fk1fl1.tiff
A8_F1R1	A8	Plate 1	PRIM1_Intron5_1	PRIM1	1	62	63	>4	1.6	1.6	RNF8	RNF8_Intron1_1	1	Plate1_r01c08f01p01-ch1sk1fk1fl1.tiff
A8_F1R1	A8	Plate 1	HUWE1_Intron8_1	HUWE1	1	142	63	>4	1.6	0.7	RNF8	RNF8_Intron1_1	1	Plate1_r01c08f01p01-ch1sk1fk1fl1.tiff
A8_F1R1	A8	Plate 1	PANK3_Intron2_1	PANK3	1	47	63	>4	1.6	2.1	RNF8	RNF8_Intron1_1	1	Plate1_r01c08f01p01-ch1sk1fk1fl1.tiff
A8_F1R1	A8	Plate 1	NDUFA10_Intron9_1	NDUFA10	1	50	63	>4	1.6	2	RNF8	RNF8_Intron1_1	1	Plate1_r01c08f01p01-ch1sk1fk1fl1.tiff
A8_F1R1	A8	Plate 1	CAT_Intron1_1	CAT	1	102	63	>4	1.6	1	RNF8	RNF8_Intron1_1	1	Plate1_r01c08f01p01-ch1sk1fk1fl1.tiff
A8_F1R2	A8	Plate 4	ATAD3A_Intron4_1	ATAD3A	18	185	19	1	94.7	9.7	ATAD3A	ATAD3A_Intron4_1	1	Plate4_r01c08f01p01-ch1sk1fk1fl1.tiff
A8_F1R2	A8	Plate 4	FAM129B_Intron6_1	FAM129B	1	35	19	2	5.3	2.9	ATAD3A	ATAD3A_Intron4_1	1	Plate4_r01c08f01p01-ch1sk1fk1fl1.tiff
A8_F1R3	A8	Plate 7	USP9X_Intron42_1	USP9X	12	40	28	1	42.9	30	USP9X;KAT7	USP9X_Intron42_1;KAT7_Intron7_1	2	Plate7_r01c08f01p01-ch1sk1fk1fl1.tiff
A8_F1R3	A8	Plate 7	KAT7_Intron7_1	KAT7	11	12	28	2	39.3	91.7	USP9X;KAT7	USP9X_Intron42_1;KAT7_Intron7_1	2	Plate7_r01c08f01p01-ch1sk1fk1fl1.tiff
A8_F1R3	A8	Plate 7	OXCT1_Intron1_1	OXCT1	1	34	28	3	3.6	2.9	USP9X;KAT7	USP9X_Intron42_1;KAT7_Intron7_1	2	Plate7_r01c08f01p01-ch1sk1fk1fl1.tiff
A8_F1R3	A8	Plate 7	CTCF_Intron9_1	CTCF	1	23	28	4	3.6	4.3	USP9X;KAT7	USP9X_Intron42_1;KAT7_Intron7_1	2	Plate7_r01c08f01p01-ch1sk1fk1fl1.tiff
A8_F1R3	A8	Plate 7	AGL_Intron26_1	AGL	1	32	28	>4	3.6	3.1	USP9X;KAT7	USP9X_Intron42_1;KAT7_Intron7_1	2	Plate7_r01c08f01p01-ch1sk1fk1fl1.tiff
A8_F1R3	A8	Plate 7	NXN_Intron7_1	NXN	1	85	28	>4	3.6	1.2	USP9X;KAT7	USP9X_Intron42_1;KAT7_Intron7_1	2	Plate7_r01c08f01p01-ch1sk1fk1fl1.tiff
A8_F1R3	A8	Plate 7	PLCB3_Intron1_1	PLCB3	1	78	28	>4	3.6	1.3	USP9X;KAT7	USP9X_Intron42_1;KAT7_Intron7_1	2	Plate7_r01c08f01p01-ch1sk1fk1fl1.tiff
A8_F2R1	A8	Plate 2	SOD1_Intron1_1	SOD1	12	18	15	1	80	66.7	SOD1	SOD1_Intron1_1	1	Plate2_r01c08f01p01-ch1sk1fk1fl1.tiff
A8_F2R1	A8	Plate 2	ITGAV_Intron3_1	ITGAV	1	65	15	2	6.7	1.5	SOD1	SOD1_Intron1_1	1	Plate2_r01c08f01p01-ch1sk1fk1fl1.tiff
A8_F2R1	A8	Plate 2	GARS_Intron6_1	GARS	1	20	15	3	6.7	5	SOD1	SOD1_Intron1_1	1	Plate2_r01c08f01p01-ch1sk1fk1fl1.tiff
A8_F2R1	A8	Plate 2	CERS2_Intron3_1	CERS2	1	38	15	4	6.7	2.6	SOD1	SOD1_Intron1_1	1	Plate2_r01c08f01p01-ch1sk1fk1fl1.tiff
A8_F2R2	A8	Plate 5	ACAT1_Intron5_1	ACAT1	14	19	17	1	82.4	73.7	ACAT1	ACAT1_Intron5_1	1	Plate5_r01c08f01p01-ch1sk1fk1fl1.tiff
A8_F2R2	A8	Plate 5	EZH2_Intron2_1	EZH2	1	22	17	2	5.9	4.5	ACAT1	ACAT1_Intron5_1	1	Plate5_r01c08f01p01-ch1sk1fk1fl1.tiff
A8_F2R2	A8	Plate 5	SET_Intron4_1	SET	1	40	17	3	5.9	2.5	ACAT1	ACAT1_Intron5_1	1	Plate5_r01c08f01p01-ch1sk1fk1fl1.tiff
A8_F2R2	A8	Plate 5	PHF8_Intron21_1	PHF8	1	57	17	4	5.9	1.8	ACAT1	ACAT1_Intron5_1	1	Plate5_r01c08f01p01-ch1sk1fk1fl1.tiff
A8_F3R1	A8	Plate 3	MTHFD1_Intron22_2	MTHFD1	3	74	7	1	42.9	4.1				Plate3_r01c08f01p01-ch1sk1fk1fl1.tiff
A8_F3R1	A8	Plate 3	NDUFS6_Intron2_1	NDUFS6	1	54	7	2	14.3	1.9				Plate3_r01c08f01p01-ch1sk1fk1fl1.tiff
A8_F3R1	A8	Plate 3	ATAD3B_Intron7_1	ATAD3B	1	31	7	3	14.3	3.2				Plate3_r01c08f01p01-ch1sk1fk1fl1.tiff
A8_F3R1	A8	Plate 3	PHF10_Intron6_1	PHF10	1	35	7	4	14.3	2.9				Plate3_r01c08f01p01-ch1sk1fk1fl1.tiff
A8_F3R1	A8	Plate 3	CYB5R3_Intron2_1	CYB5R3	1	270	7	>4	14.3	0.4				Plate3_r01c08f01p01-ch1sk1fk1fl1.tiff
A8_F3R2	A8	Plate 6	SIRT1_Intron4_2	SIRT1	2	5	7	1	28.6	40				Plate6_r01c08f01p01-ch1sk1fk1fl1.tiff
A8_F3R2	A8	Plate 6	ADH1C_Intron5_1	ADH1C	1	9	7	2	14.3	11.1				Plate6_r01c08f01p01-ch1sk1fk1fl1.tiff
A8_F3R2	A8	Plate 6	NUDT9_Intron5_1	NUDT9	1	3	7	3	14.3	33.3				Plate6_r01c08f01p01-ch1sk1fk1fl1.tiff
A8_F3R2	A8	Plate 6	RPA1_Intron11_1	RPA1	1	1	7	4	14.3	100				Plate6_r01c08f01p01-ch1sk1fk1fl1.tiff
A8_F3R2	A8	Plate 6	STAT5A_Intron14_1	STAT5A	1	25	7	>4	14.3	4				Plate6_r01c08f01p01-ch1sk1fk1fl1.tiff
A8_F3R2	A8	Plate 6	PHF8_Intron21_1	PHF8	1	57	7	>4	14.3	1.8				Plate6_r01c08f01p01-ch1sk1fk1fl1.tiff
A8_F3R3	A8	Plate 9	OXA1L_Intron1_1	OXA1L	1	74	1	1	100	1.4
A9_F1R1	A9	Plate 1	ATAD3A_Intron4_1	ATAD3A	35	185	53	1	66	18.9	ATAD3A	ATAD3A_Intron4_1	1	Plate1_r01c09f01p01-ch1sk1fk1fl1.tiff
A9_F1R1	A9	Plate 1	NDUFA10_Intron9_1	NDUFA10	2	50	53	2	3.8	4	ATAD3A	ATAD3A_Intron4_1	1	Plate1_r01c09f01p01-ch1sk1fk1fl1.tiff
A9_F1R1	A9	Plate 1	ITGAV_Intron3_1	ITGAV	2	65	53	3	3.8	3.1	ATAD3A	ATAD3A_Intron4_1	1	Plate1_r01c09f01p01-ch1sk1fk1fl1.tiff
A9_F1R1	A9	Plate 1	LARS2_Intron4_1	LARS2	1	98	53	4	1.9	1	ATAD3A	ATAD3A_Intron4_1	1	Plate1_r01c09f01p01-ch1sk1fk1fl1.tiff
A9_F1R1	A9	Plate 1	RNF8_Intron1_1	RNF8	1	62	53	>4	1.9	1.6	ATAD3A	ATAD3A_Intron4_1	1	Plate1_r01c09f01p01-ch1sk1fk1fl1.tiff
A9_F1R1	A9	Plate 1	AKR1C2_Intron5_1	AKR1C2	1	30	53	>4	1.9	3.3	ATAD3A	ATAD3A_Intron4_1	1	Plate1_r01c09f01p01-ch1sk1fk1fl1.tiff
A9_F1R1	A9	Plate 1	COX6C_Intron2_2	COX6C	1	74	53	>4	1.9	1.4	ATAD3A	ATAD3A_Intron4_1	1	Plate1_r01c09f01p01-ch1sk1fk1fl1.tiff
A9_F1R1	A9	Plate 1	CS_Intron10_1	CS	1	66	53	>4	1.9	1.5	ATAD3A	ATAD3A_Intron4_1	1	Plate1_r01c09f01p01-ch1sk1fk1fl1.tiff
A9_F1R1	A9	Plate 1	WDR82_Intron6_1	WDR82	1	17	53	>4	1.9	5.9	ATAD3A	ATAD3A_Intron4_1	1	Plate1_r01c09f01p01-ch1sk1fk1fl1.tiff
A9_F1R1	A9	Plate 1	H2AFY_Intron4_1	H2AFY	1	73	53	>4	1.9	1.4	ATAD3A	ATAD3A_Intron4_1	1	Plate1_r01c09f01p01-ch1sk1fk1fl1.tiff
A9_F1R1	A9	Plate 1	CTR9_Intron1_1	CTR9	1	180	53	>4	1.9	0.6	ATAD3A	ATAD3A_Intron4_1	1	Plate1_r01c09f01p01-ch1sk1fk1fl1.tiff
A9_F1R1	A9	Plate 1	GMPS_Intron10_1	GMPS	1	21	53	>4	1.9	4.8	ATAD3A	ATAD3A_Intron4_1	1	Plate1_r01c09f01p01-ch1sk1fk1fl1.tiff
A9_F1R1	A9	Plate 1	AKAP8L_Intron13_1	AKAP8L	1	46	53	>4	1.9	2.2	ATAD3A	ATAD3A_Intron4_1	1	Plate1_r01c09f01p01-ch1sk1fk1fl1.tiff
A9_F1R1	A9	Plate 1	ACLY_Intron7_1	ACLY	1	68	53	>4	1.9	1.5	ATAD3A	ATAD3A_Intron4_1	1	Plate1_r01c09f01p01-ch1sk1fk1fl1.tiff
A9_F1R1	A9	Plate 1	RUVBL1_Intron2_1	RUVBL1	1	80	53	>4	1.9	1.3	ATAD3A	ATAD3A_Intron4_1	1	Plate1_r01c09f01p01-ch1sk1fk1fl1.tiff
A9_F1R1	A9	Plate 1	HUWE1_Intron8_1	HUWE1	1	142	53	>4	1.9	0.7	ATAD3A	ATAD3A_Intron4_1	1	Plate1_r01c09f01p01-ch1sk1fk1fl1.tiff
A9_F1R1	A9	Plate 1	PKM_Intron7_1	PKM	1	57	53	>4	1.9	1.8	ATAD3A	ATAD3A_Intron4_1	1	Plate1_r01c09f01p01-ch1sk1fk1fl1.tiff
A9_F1R2	A9	Plate 4	HADHA_Intron15_1	HADHA	42	59	48	1	87.5	71.2	HADHA	HADHA_Intron15_1	1	Plate4_r01c09f01p01-ch1sk1fk1fl1.tiff
A9_F1R2	A9	Plate 4	AGPS_Intron13_1	AGPS	2	21	48	2	4.2	9.5	HADHA	HADHA_Intron15_1	1	Plate4_r01c09f01p01-ch1sk1fk1fl1.tiff
A9_F1R2	A9	Plate 4	SPTLC2_Intron1_1	SPTLC2	1	42	48	3	2.1	2.4	HADHA	HADHA_Intron15_1	1	Plate4_r01c09f01p01-ch1sk1fk1fl1.tiff
A9_F1R2	A9	Plate 4	FUBP3_Intron13_1	FUBP3	1	66	48	4	2.1	1.5	HADHA	HADHA_Intron15_1	1	Plate4_r01c09f01p01-ch1sk1fk1fl1.tiff
A9_F1R2	A9	Plate 4	GPHN_Intron17_1	GPHN	1	3	48	>4	2.1	33.3	HADHA	HADHA_Intron15_1	1	Plate4_r01c09f01p01-ch1sk1fk1fl1.tiff
A9_F1R2	A9	Plate 4	NDUFA8_Intron1_2	NDUFA8	1	39	48	>4	2.1	2.6	HADHA	HADHA_Intron15_1	1	Plate4_r01c09f01p01-ch1sk1fk1fl1.tiff
A9_F1R3	A9	Plate 7	FASN_Intron22_1	FASN	18	55	33	1	54.5	32.7	FASN	FASN_Intron22_1	1	Plate7_r01c09f01p01-ch1sk1fk1fl1.tiff
A9_F1R3	A9	Plate 7	EPHX2_Intron6_1	EPHX2	8	25	33	2	24.2	32	FASN	FASN_Intron22_1	1	Plate7_r01c09f01p01-ch1sk1fk1fl1.tiff
A9_F1R3	A9	Plate 7	ANGPTL4_Intron1_1	ANGPTL4	7	33	33	3	21.2	21.2	FASN	FASN_Intron22_1	1	Plate7_r01c09f01p01-ch1sk1fk1fl1.tiff
A9_F2R1	A9	Plate 2	RUVBL1_Intron2_1	RUVBL1	5	80	16	1	31.3	6.3				Plate2_r01c09f01p01-ch1sk1fk1fl1.tiff
A9_F2R1	A9	Plate 2	CS_Intron6_1	CS	2	190	16	2	12.5	1.1				Plate2_r01c09f01p01-ch1sk1fk1fl1.tiff
A9_F2R1	A9	Plate 2	DARS2_Intron9_1	DARS2	1	80	16	3	6.3	1.3				Plate2_r01c09f01p01-ch1sk1fk1fl1.tiff
A9_F2R1	A9	Plate 2	ASXL1_Intron1_1	ASXL1	1	75	16	4	6.3	1.3				Plate2_r01c09f01p01-ch1sk1fk1fl1.tiff
A9_F2R1	A9	Plate 2	RNF8_Intron1_1	RNF8	1	62	16	>4	6.3	1.6				Plate2_r01c09f01p01-ch1sk1fk1fl1.tiff
A9_F2R1	A9	Plate 2	AKR1C2_Intron5_1	AKR1C2	1	30	16	>4	6.3	3.3				Plate2_r01c09f01p01-ch1sk1fk1fl1.tiff
A9_F2R1	A9	Plate 2	GSR_Intron4_1	GSR	1	82	16	>4	6.3	1.2				Plate2_r01c09f01p01-ch1sk1fk1fl1.tiff
A9_F2R1	A9	Plate 2	ASNS_Intron8_1	ASNS	1	31	16	>4	6.3	3.2				Plate2_r01c09f01p01-ch1sk1fk1fl1.tiff
A9_F2R1	A9	Plate 2	SDHB_Intron6_1	SDHB	1	2	16	>4	6.3	50				Plate2_r01c09f01p01-ch1sk1fk1fl1.tiff
A9_F2R1	A9	Plate 2	QARS_Intron3_1	QARS	1	36	16	>4	6.3	2.8				Plate2_r01c09f01p01-ch1sk1fk1fl1.tiff
A9_F2R1	A9	Plate 2	SMAD4_Intron2_1	SMAD4	1	80	16	>4	6.3	1.3				Plate2_r01c09f01p01-ch1sk1fk1fl1.tiff
A9_F2R2	A9	Plate 5	SMOX_Intron7_1	SMOX	10	57	18	1	55.6	17.5	SMOX	SMOX_Intron7_1	1	Plate5_r01c09f01p01-ch1sk1fk1fl1.tiff
A9_F2R2	A9	Plate 5	SDHA_Intron14_1	SDHA	3	56	18	2	16.7	5.4	SMOX	SMOX_Intron7_1	1	Plate5_r01c09f01p01-ch1sk1fk1fl1.tiff
A9_F2R2	A9	Plate 5	PDHB_Intron5_1	PDHB	1	22	18	3	5.6	4.5	SMOX	SMOX_Intron7_1	1	Plate5_r01c09f01p01-ch1sk1fk1fl1.tiff
A9_F2R2	A9	Plate 5	PLOD3_Intron8_1	PLOD3	1	90	18	4	5.6	1.1	SMOX	SMOX_Intron7_1	1	Plate5_r01c09f01p01-ch1sk1fk1fl1.tiff
A9_F2R2	A9	Plate 5	SORD_Intron1_2	SORD	1	38	18	>4	5.6	2.6	SMOX	SMOX_Intron7_1	1	Plate5_r01c09f01p01-ch1sk1fk1fl1.tiff
A9_F2R2	A9	Plate 5	SMAD4_Intron2_1	SMAD4	1	80	18	>4	5.6	1.3	SMOX	SMOX_Intron7_1	1	Plate5_r01c09f01p01-ch1sk1fk1fl1.tiff
A9_F2R2	A9	Plate 5	MEAF6_Intron1_1	MEAF6	1	49	18	>4	5.6	2	SMOX	SMOX_Intron7_1	1	Plate5_r01c09f01p01-ch1sk1fk1fl1.tiff
A9_F2R3	A9	Plate 8	GANAB_Intron21_1	GANAB	1	90	3	1	33.3	1.1
A9_F2R3	A9	Plate 8	OAT_Intron6_1	OAT	1	121	3	2	33.3	0.8
A9_F2R3	A9	Plate 8	ADSL_Intron2_1	ADSL	1	9	3	3	33.3	11.1
A9_F3R1	A9	Plate 3	PFKP_Intron3_2	PFKP	3	51	15	1	20	5.9				Plate3_r01c09f01p01-ch1sk1fk1fl1.tiff
A9_F3R1	A9	Plate 3	MIER2_Intron6_1	MIER2	2	2	15	2	13.3	100				Plate3_r01c09f01p01-ch1sk1fk1fl1.tiff
A9_F3R1	A9	Plate 3	NDUFV2_Intron2_1	NDUFV2	2	36	15	3	13.3	5.6				Plate3_r01c09f01p01-ch1sk1fk1fl1.tiff
A9_F3R1	A9	Plate 3	LARS2_Intron4_1	LARS2	1	98	15	4	6.7	1				Plate3_r01c09f01p01-ch1sk1fk1fl1.tiff
A9_F3R1	A9	Plate 3	FASN_Intron22_1	FASN	1	55	15	>4	6.7	1.8				Plate3_r01c09f01p01-ch1sk1fk1fl1.tiff
A9_F3R1	A9	Plate 3	ATAD3B_Intron7_1	ATAD3B	1	31	15	>4	6.7	3.2				Plate3_r01c09f01p01-ch1sk1fk1fl1.tiff
A9_F3R1	A9	Plate 3	MUT_Intron3_1	MUT	1	43	15	>4	6.7	2.3				Plate3_r01c09f01p01-ch1sk1fk1fl1.tiff
A9_F3R1	A9	Plate 3	HUWE1_Intron8_1	HUWE1	1	142	15	>4	6.7	0.7				Plate3_r01c09f01p01-ch1sk1fk1fl1.tiff
A9_F3R1	A9	Plate 3	GAPDH_Intron3_2	GAPDH	1	71	15	>4	6.7	1.4				Plate3_r01c09f01p01-ch1sk1fk1fl1.tiff
A9_F3R1	A9	Plate 3	PDE9A_Intron16_1	PDE9A	1	42	15	>4	6.7	2.4				Plate3_r01c09f01p01-ch1sk1fk1fl1.tiff
A9_F3R1	A9	Plate 3	COQ10A_Intron3_1	COQ10A	1	50	15	>4	6.7	2				Plate3_r01c09f01p01-ch1sk1fk1fl1.tiff
A9_F3R2	A9	Plate 6	SET_Intron4_1	SET	30	40	41	1	73.2	75	SET	SET_Intron4_1	1	Plate6_r01c09f01p01-ch1sk1fk1fl1.tiff
A9_F3R2	A9	Plate 6	NSUN2_Intron4_1	NSUN2	1	65	41	2	2.4	1.5	SET	SET_Intron4_1	1	Plate6_r01c09f01p01-ch1sk1fk1fl1.tiff
A9_F3R2	A9	Plate 6	PFKP_Intron3_2	PFKP	1	51	41	3	2.4	2	SET	SET_Intron4_1	1	Plate6_r01c09f01p01-ch1sk1fk1fl1.tiff
A9_F3R2	A9	Plate 6	NDUFV2_Intron2_1	NDUFV2	1	36	41	4	2.4	2.8	SET	SET_Intron4_1	1	Plate6_r01c09f01p01-ch1sk1fk1fl1.tiff
A9_F3R2	A9	Plate 6	NUDT3_Intron1_2	NUDT3	1	29	41	>4	2.4	3.4	SET	SET_Intron4_1	1	Plate6_r01c09f01p01-ch1sk1fk1fl1.tiff
A9_F3R2	A9	Plate 6	BCAT1_Intron1_1	BCAT1	1	14	41	>4	2.4	7.1	SET	SET_Intron4_1	1	Plate6_r01c09f01p01-ch1sk1fk1fl1.tiff
A9_F3R2	A9	Plate 6	RTN4IP1_Intron3_1	RTN4IP1	1	20	41	>4	2.4	5	SET	SET_Intron4_1	1	Plate6_r01c09f01p01-ch1sk1fk1fl1.tiff
A9_F3R2	A9	Plate 6	PPAT_Intron9_1	PPAT	1	78	41	>4	2.4	1.3	SET	SET_Intron4_1	1	Plate6_r01c09f01p01-ch1sk1fk1fl1.tiff
A9_F3R2	A9	Plate 6	IDI1_Intron4_3	IDI1	1	100	41	>4	2.4	1	SET	SET_Intron4_1	1	Plate6_r01c09f01p01-ch1sk1fk1fl1.tiff
A9_F3R2	A9	Plate 6	HUWE1_Intron8_1	HUWE1	1	142	41	>4	2.4	0.7	SET	SET_Intron4_1	1	Plate6_r01c09f01p01-ch1sk1fk1fl1.tiff
A9_F3R2	A9	Plate 6	FAM129B_Intron6_1	FAM129B	1	35	41	>4	2.4	2.9	SET	SET_Intron4_1	1	Plate6_r01c09f01p01-ch1sk1fk1fl1.tiff
A9_F3R2	A9	Plate 6	GFPT1_Intron13_1	GFPT1	1	29	41	>4	2.4	3.4	SET	SET_Intron4_1	1	Plate6_r01c09f01p01-ch1sk1fk1fl1.tiff
A9_F3R3	A9	Plate 9	SET_Intron4_1	SET	1	40	4	1	25	2.5
A9_F3R3	A9	Plate 9	TIGAR_Intron3_1	TIGAR	1	3	4	2	25	33.3
A9_F3R3	A9	Plate 9	AGL_Intron26_1	AGL	1	32	4	3	25	3.1
A9_F3R3	A9	Plate 9	ADSL_Intron2_1	ADSL	1	9	4	4	25	11.1
B1_F1R1	B1	Plate 1	CYC1_Intron1_1	CYC1	40	71	80	1	50	56.3	CYC1;SEPHS1	CYC1_Intron1_1;SEPHS1_Intron6_1	2	Plate1_r02c01f01p01-ch1sk1fk1fl1.tiff
B1_F1R1	B1	Plate 1	SEPHS1_Intron6_1	SEPHS1	27	84	80	2	33.8	32.1	CYC1;SEPHS1	CYC1_Intron1_1;SEPHS1_Intron6_1	2	Plate1_r02c01f01p01-ch1sk1fk1fl1.tiff
B1_F1R1	B1	Plate 1	NNT_Intron21_1	NNT	2	65	80	3	2.5	3.1	CYC1;SEPHS1	CYC1_Intron1_1;SEPHS1_Intron6_1	2	Plate1_r02c01f01p01-ch1sk1fk1fl1.tiff
B1_F1R1	B1	Plate 1	NSUN2_Intron1_1	NSUN2	1	20	80	4	1.3	5	CYC1;SEPHS1	CYC1_Intron1_1;SEPHS1_Intron6_1	2	Plate1_r02c01f01p01-ch1sk1fk1fl1.tiff
B1_F1R1	B1	Plate 1	COX7A2_Intron2_1	COX7A2	1	31	80	>4	1.3	3.2	CYC1;SEPHS1	CYC1_Intron1_1;SEPHS1_Intron6_1	2	Plate1_r02c01f01p01-ch1sk1fk1fl1.tiff
B1_F1R1	B1	Plate 1	ANGPTL4_Intron1_1	ANGPTL4	1	33	80	>4	1.3	3	CYC1;SEPHS1	CYC1_Intron1_1;SEPHS1_Intron6_1	2	Plate1_r02c01f01p01-ch1sk1fk1fl1.tiff
B1_F1R1	B1	Plate 1	P4HB_Intron10_1	P4HB	1	47	80	>4	1.3	2.1	CYC1;SEPHS1	CYC1_Intron1_1;SEPHS1_Intron6_1	2	Plate1_r02c01f01p01-ch1sk1fk1fl1.tiff
B1_F1R1	B1	Plate 1	NUDT14_Intron1_1	NUDT14	1	61	80	>4	1.3	1.6	CYC1;SEPHS1	CYC1_Intron1_1;SEPHS1_Intron6_1	2	Plate1_r02c01f01p01-ch1sk1fk1fl1.tiff
B1_F1R1	B1	Plate 1	HMGA2_Intron1_1	HMGA2	1	93	80	>4	1.3	1.1	CYC1;SEPHS1	CYC1_Intron1_1;SEPHS1_Intron6_1	2	Plate1_r02c01f01p01-ch1sk1fk1fl1.tiff
B1_F1R1	B1	Plate 1	CYP7A1_Intron2_2	CYP7A1	1	82	80	>4	1.3	1.2	CYC1;SEPHS1	CYC1_Intron1_1;SEPHS1_Intron6_1	2	Plate1_r02c01f01p01-ch1sk1fk1fl1.tiff
B1_F1R1	B1	Plate 1	HSD17B10_Intron4_1	HSD17B10	1	73	80	>4	1.3	1.4	CYC1;SEPHS1	CYC1_Intron1_1;SEPHS1_Intron6_1	2	Plate1_r02c01f01p01-ch1sk1fk1fl1.tiff
B1_F1R1	B1	Plate 1	IDH3A_Intron2_1	IDH3A	1	59	80	>4	1.3	1.7	CYC1;SEPHS1	CYC1_Intron1_1;SEPHS1_Intron6_1	2	Plate1_r02c01f01p01-ch1sk1fk1fl1.tiff
B1_F1R1	B1	Plate 1	CS_Intron3_1	CS	1	53	80	>4	1.3	1.9	CYC1;SEPHS1	CYC1_Intron1_1;SEPHS1_Intron6_1	2	Plate1_r02c01f01p01-ch1sk1fk1fl1.tiff
B1_F1R1	B1	Plate 1	AFG3L2_Intron4_1	AFG3L2	1	58	80	>4	1.3	1.7	CYC1;SEPHS1	CYC1_Intron1_1;SEPHS1_Intron6_1	2	Plate1_r02c01f01p01-ch1sk1fk1fl1.tiff
B1_F1R2	B1	Plate 4	CS_Intron3_1	CS	40	53	58	1	69	75.5	CS	CS_Intron3_1	1	Plate4_r02c01f01p01-ch1sk1fk1fl1.tiff
B1_F1R2	B1	Plate 4	GFPT1_Intron13_1	GFPT1	3	29	58	2	5.2	10.3	CS	CS_Intron3_1	1	Plate4_r02c01f01p01-ch1sk1fk1fl1.tiff
B1_F1R2	B1	Plate 4	KDM1A_Intron8_1	KDM1A	2	42	58	3	3.4	4.8	CS	CS_Intron3_1	1	Plate4_r02c01f01p01-ch1sk1fk1fl1.tiff
B1_F1R2	B1	Plate 4	GPD2_Intron2_1	GPD2	2	41	58	4	3.4	4.9	CS	CS_Intron3_1	1	Plate4_r02c01f01p01-ch1sk1fk1fl1.tiff
B1_F1R2	B1	Plate 4	UBE2N_Intron1_1	UBE2N	2	88	58	>4	3.4	2.3	CS	CS_Intron3_1	1	Plate4_r02c01f01p01-ch1sk1fk1fl1.tiff
B1_F1R2	B1	Plate 4	RPA2_Intron3_1	RPA2	1	34	58	>4	1.7	2.9	CS	CS_Intron3_1	1	Plate4_r02c01f01p01-ch1sk1fk1fl1.tiff
B1_F1R2	B1	Plate 4	ALDH7A1_Intron1_1	ALDH7A1	1	81	58	>4	1.7	1.2	CS	CS_Intron3_1	1	Plate4_r02c01f01p01-ch1sk1fk1fl1.tiff
B1_F1R2	B1	Plate 4	GLYR1_Intron8_1	GLYR1	1	17	58	>4	1.7	5.9	CS	CS_Intron3_1	1	Plate4_r02c01f01p01-ch1sk1fk1fl1.tiff
B1_F1R2	B1	Plate 4	FMR1_Intron8_1	FMR1	1	70	58	>4	1.7	1.4	CS	CS_Intron3_1	1	Plate4_r02c01f01p01-ch1sk1fk1fl1.tiff
B1_F1R2	B1	Plate 4	NDUFA4_Intron3_2	NDUFA4	1	34	58	>4	1.7	2.9	CS	CS_Intron3_1	1	Plate4_r02c01f01p01-ch1sk1fk1fl1.tiff
B1_F1R2	B1	Plate 4	LTA4H_Intron13_1	LTA4H	1	28	58	>4	1.7	3.6	CS	CS_Intron3_1	1	Plate4_r02c01f01p01-ch1sk1fk1fl1.tiff
B1_F1R2	B1	Plate 4	SDHA_Intron14_1	SDHA	1	56	58	>4	1.7	1.8	CS	CS_Intron3_1	1	Plate4_r02c01f01p01-ch1sk1fk1fl1.tiff
B1_F1R2	B1	Plate 4	APOO_Intron1_1	APOO	1	32	58	>4	1.7	3.1	CS	CS_Intron3_1	1	Plate4_r02c01f01p01-ch1sk1fk1fl1.tiff
B1_F1R2	B1	Plate 4	GART_Intron5_1	GART	1	23	58	>4	1.7	4.3	CS	CS_Intron3_1	1	Plate4_r02c01f01p01-ch1sk1fk1fl1.tiff
B1_F1R3	B1	Plate 7	PLA2G4F_Intron8_1	PLA2G4F	9	28	23	1	39.1	32.1				Plate7_r02c01f01p01-ch1sk1fk1fl1.tiff
B1_F1R3	B1	Plate 7	H2AFY_Intron4_2	H2AFY	9	31	23	2	39.1	29				Plate7_r02c01f01p01-ch1sk1fk1fl1.tiff
B1_F1R3	B1	Plate 7	DNMT1_Intron37_1	DNMT1	1	2	23	3	4.3	50				Plate7_r02c01f01p01-ch1sk1fk1fl1.tiff
B1_F1R3	B1	Plate 7	MAN1B1_Intron1_1	MAN1B1	1	3	23	4	4.3	33.3				Plate7_r02c01f01p01-ch1sk1fk1fl1.tiff
B1_F1R3	B1	Plate 7	SET_Intron6_1	SET	1	39	23	>4	4.3	2.6				Plate7_r02c01f01p01-ch1sk1fk1fl1.tiff
B1_F1R3	B1	Plate 7	ACOT7_Intron2_2	ACOT7	1	115	23	>4	4.3	0.9				Plate7_r02c01f01p01-ch1sk1fk1fl1.tiff
B1_F1R3	B1	Plate 7	ERI1_Intron1_1	ERI1	1	63	23	>4	4.3	1.6				Plate7_r02c01f01p01-ch1sk1fk1fl1.tiff
B1_F2R1	B1	Plate 2	AMPD2_Intron10_1	AMPD2	10	10	29	1	34.5	100				Plate2_r02c01f01p01-ch1sk1fk1fl1.tiff
B1_F2R1	B1	Plate 2	NPC1_Intron13_1	NPC1	5	6	29	2	17.2	83.3				Plate2_r02c01f01p01-ch1sk1fk1fl1.tiff
B1_F2R1	B1	Plate 2	RPA1_Intron8_1	RPA1	4	42	29	3	13.8	9.5				Plate2_r02c01f01p01-ch1sk1fk1fl1.tiff
B1_F2R1	B1	Plate 2	NT5C3B_Intron1_1	NT5C3B	2	47	29	4	6.9	4.3				Plate2_r02c01f01p01-ch1sk1fk1fl1.tiff
B1_F2R1	B1	Plate 2	LMNA_Intron8_1	LMNA	1	21	29	>4	3.4	4.8				Plate2_r02c01f01p01-ch1sk1fk1fl1.tiff
B1_F2R1	B1	Plate 2	WAC_Intron2_1	WAC	1	5	29	>4	3.4	20				Plate2_r02c01f01p01-ch1sk1fk1fl1.tiff
B1_F2R1	B1	Plate 2	BSCL2_Intron5_1	BSCL2	1	17	29	>4	3.4	5.9				Plate2_r02c01f01p01-ch1sk1fk1fl1.tiff
B1_F2R1	B1	Plate 2	LRRK2_Intron46_1	LRRK2	1	24	29	>4	3.4	4.2				Plate2_r02c01f01p01-ch1sk1fk1fl1.tiff
B1_F2R1	B1	Plate 2	ACLY_Intron7_1	ACLY	1	68	29	>4	3.4	1.5				Plate2_r02c01f01p01-ch1sk1fk1fl1.tiff
B1_F2R1	B1	Plate 2	GLOD4_Intron1_1	GLOD4	1	42	29	>4	3.4	2.4				Plate2_r02c01f01p01-ch1sk1fk1fl1.tiff
B1_F2R1	B1	Plate 2	HIBCH_Intron2_1	HIBCH	1	22	29	>4	3.4	4.5				Plate2_r02c01f01p01-ch1sk1fk1fl1.tiff
B1_F2R1	B1	Plate 2	PARK7_Intron4_2	PARK7	1	139	29	>4	3.4	0.7				Plate2_r02c01f01p01-ch1sk1fk1fl1.tiff
B1_F2R2	B1	Plate 5	PTGR1_Intron9_1	PTGR1	1	9	10	1	10	11.1				Plate5_r02c01f01p01-ch1sk1fk1fl1.tiff
B1_F2R2	B1	Plate 5	NUDT5_Intron2_1	NUDT5	1	1	10	2	10	100				Plate5_r02c01f01p01-ch1sk1fk1fl1.tiff
B1_F2R2	B1	Plate 5	PLOD3_Intron8_1	PLOD3	1	90	10	3	10	1.1				Plate5_r02c01f01p01-ch1sk1fk1fl1.tiff
B1_F2R2	B1	Plate 5	MAGT1_Intron6_1	MAGT1	1	57	10	4	10	1.8				Plate5_r02c01f01p01-ch1sk1fk1fl1.tiff
B1_F2R2	B1	Plate 5	GSS_Intron9_1	GSS	1	40	10	>4	10	2.5				Plate5_r02c01f01p01-ch1sk1fk1fl1.tiff
B1_F2R2	B1	Plate 5	EPHX4_Intron1_1	EPHX4	1	43	10	>4	10	2.3				Plate5_r02c01f01p01-ch1sk1fk1fl1.tiff
B1_F2R2	B1	Plate 5	PDHB_Intron1_1	PDHB	1	30	10	>4	10	3.3				Plate5_r02c01f01p01-ch1sk1fk1fl1.tiff
B1_F2R2	B1	Plate 5	CAT_Intron1_1	CAT	1	102	10	>4	10	1				Plate5_r02c01f01p01-ch1sk1fk1fl1.tiff
B1_F2R2	B1	Plate 5	PPIF_Intron3_2	PPIF	1	8	10	>4	10	12.5				Plate5_r02c01f01p01-ch1sk1fk1fl1.tiff
B1_F2R2	B1	Plate 5	PARK7_Intron4_2	PARK7	1	139	10	>4	10	0.7				Plate5_r02c01f01p01-ch1sk1fk1fl1.tiff
B1_F2R3	B1	Plate 8	GLOD4_Intron1_1	GLOD4	12	42	22	1	54.5	28.6	GLOD4	GLOD4_Intron1_1	1	Plate8_r02c01f01p01-ch1sk1fk1fl1.tiff
B1_F2R3	B1	Plate 8	PTGR1_Intron9_1	PTGR1	4	9	22	2	18.2	44.4	GLOD4	GLOD4_Intron1_1	1	Plate8_r02c01f01p01-ch1sk1fk1fl1.tiff
B1_F2R3	B1	Plate 8	ADH5_Intron2_1	ADH5	3	11	22	3	13.6	27.3	GLOD4	GLOD4_Intron1_1	1	Plate8_r02c01f01p01-ch1sk1fk1fl1.tiff
B1_F2R3	B1	Plate 8	ECHS1_Intron7_2	ECHS1	2	27	22	4	9.1	7.4	GLOD4	GLOD4_Intron1_1	1	Plate8_r02c01f01p01-ch1sk1fk1fl1.tiff
B1_F2R3	B1	Plate 8	GAPDH_Intron3_2	GAPDH	1	71	22	>4	4.5	1.4	GLOD4	GLOD4_Intron1_1	1	Plate8_r02c01f01p01-ch1sk1fk1fl1.tiff
B1_F3R1	B1	Plate 3	KARS_Intron6_1	KARS	23	30	45	1	51.1	76.7	KARS;OTC	KARS_Intron6_1;OTC_Intron7_1	2	Plate3_r02c01f01p01-ch1sk1fk1fl1.tiff
B1_F3R1	B1	Plate 3	OTC_Intron7_1	OTC	17	19	45	2	37.8	89.5	KARS;OTC	KARS_Intron6_1;OTC_Intron7_1	2	Plate3_r02c01f01p01-ch1sk1fk1fl1.tiff
B1_F3R1	B1	Plate 3	IDE_Intron13_1	IDE	2	94	45	3	4.4	2.1	KARS;OTC	KARS_Intron6_1;OTC_Intron7_1	2	Plate3_r02c01f01p01-ch1sk1fk1fl1.tiff
B1_F3R1	B1	Plate 3	HMGA2_Intron1_1	HMGA2	1	93	45	4	2.2	1.1	KARS;OTC	KARS_Intron6_1;OTC_Intron7_1	2	Plate3_r02c01f01p01-ch1sk1fk1fl1.tiff
B1_F3R1	B1	Plate 3	SEPHS1_Intron6_1	SEPHS1	1	84	45	>4	2.2	1.2	KARS;OTC	KARS_Intron6_1;OTC_Intron7_1	2	Plate3_r02c01f01p01-ch1sk1fk1fl1.tiff
B1_F3R1	B1	Plate 3	KDM3B_Intron6_1	KDM3B	1	32	45	>4	2.2	3.1	KARS;OTC	KARS_Intron6_1;OTC_Intron7_1	2	Plate3_r02c01f01p01-ch1sk1fk1fl1.tiff
B1_F3R2	B1	Plate 6	SDHA_Intron14_1	SDHA	14	56	43	1	32.6	25	SDHA;EBPL	SDHA_Intron14_1;EBPL_Intron1_1	2	Plate6_r02c01f01p01-ch1sk1fk1fl1.tiff
B1_F3R2	B1	Plate 6	EBPL_Intron1_1	EBPL	12	15	43	2	27.9	80	SDHA;EBPL	SDHA_Intron14_1;EBPL_Intron1_1	2	Plate6_r02c01f01p01-ch1sk1fk1fl1.tiff
B1_F3R2	B1	Plate 6	RARS_Intron12_1	RARS	8	9	43	3	18.6	88.9	SDHA;EBPL	SDHA_Intron14_1;EBPL_Intron1_1	2	Plate6_r02c01f01p01-ch1sk1fk1fl1.tiff
B1_F3R2	B1	Plate 6	MTR_Intron7_1	MTR	1	57	43	4	2.3	1.8	SDHA;EBPL	SDHA_Intron14_1;EBPL_Intron1_1	2	Plate6_r02c01f01p01-ch1sk1fk1fl1.tiff
B1_F3R2	B1	Plate 6	MAN1B1_Intron1_1	MAN1B1	1	3	43	>4	2.3	33.3	SDHA;EBPL	SDHA_Intron14_1;EBPL_Intron1_1	2	Plate6_r02c01f01p01-ch1sk1fk1fl1.tiff
B1_F3R2	B1	Plate 6	CYP7A1_Intron2_2	CYP7A1	1	82	43	>4	2.3	1.2	SDHA;EBPL	SDHA_Intron14_1;EBPL_Intron1_1	2	Plate6_r02c01f01p01-ch1sk1fk1fl1.tiff
B1_F3R2	B1	Plate 6	CUL4B_Intron11_1	CUL4B	1	22	43	>4	2.3	4.5	SDHA;EBPL	SDHA_Intron14_1;EBPL_Intron1_1	2	Plate6_r02c01f01p01-ch1sk1fk1fl1.tiff
B1_F3R2	B1	Plate 6	NDUFB6_Intron2_2	NDUFB6	1	18	43	>4	2.3	5.6	SDHA;EBPL	SDHA_Intron14_1;EBPL_Intron1_1	2	Plate6_r02c01f01p01-ch1sk1fk1fl1.tiff
B1_F3R2	B1	Plate 6	PTEN_Intron8_1	PTEN	1	39	43	>4	2.3	2.6	SDHA;EBPL	SDHA_Intron14_1;EBPL_Intron1_1	2	Plate6_r02c01f01p01-ch1sk1fk1fl1.tiff
B1_F3R2	B1	Plate 6	CS_Intron10_1	CS	1	66	43	>4	2.3	1.5	SDHA;EBPL	SDHA_Intron14_1;EBPL_Intron1_1	2	Plate6_r02c01f01p01-ch1sk1fk1fl1.tiff
B1_F3R2	B1	Plate 6	KDM3B_Intron6_1	KDM3B	1	32	43	>4	2.3	3.1	SDHA;EBPL	SDHA_Intron14_1;EBPL_Intron1_1	2	Plate6_r02c01f01p01-ch1sk1fk1fl1.tiff
B1_F3R2	B1	Plate 6	CS_Intron3_1	CS	1	53	43	>4	2.3	1.9	SDHA;EBPL	SDHA_Intron14_1;EBPL_Intron1_1	2	Plate6_r02c01f01p01-ch1sk1fk1fl1.tiff
B1_F3R3	B1	Plate 9	DDOST_Intron6_1	DDOST	1	9	2	1	50	11.1
B1_F3R3	B1	Plate 9	OSBPL11_Intron12_1	OSBPL11	1	74	2	2	50	1.4
B10_F1R1	B10	Plate 1	TTYH3_Intron13_1	TTYH3	15	17	53	1	28.3	88.2	TTYH3;KDM6A	TTYH3_Intron13_1;KDM6A_Intron28_1	2	Plate1_r02c10f01p01-ch1sk1fk1fl1.tiff
B10_F1R1	B10	Plate 1	KDM6A_Intron28_1	KDM6A	12	14	53	2	22.6	85.7	TTYH3;KDM6A	TTYH3_Intron13_1;KDM6A_Intron28_1	2	Plate1_r02c10f01p01-ch1sk1fk1fl1.tiff
B10_F1R1	B10	Plate 1	HMGA2_Intron1_1	HMGA2	7	93	53	3	13.2	7.5	TTYH3;KDM6A	TTYH3_Intron13_1;KDM6A_Intron28_1	2	Plate1_r02c10f01p01-ch1sk1fk1fl1.tiff
B10_F1R1	B10	Plate 1	OAS3_Intron15_1	OAS3	2	39	53	4	3.8	5.1	TTYH3;KDM6A	TTYH3_Intron13_1;KDM6A_Intron28_1	2	Plate1_r02c10f01p01-ch1sk1fk1fl1.tiff
B10_F1R1	B10	Plate 1	LARS2_Intron4_1	LARS2	2	98	53	>4	3.8	2	TTYH3;KDM6A	TTYH3_Intron13_1;KDM6A_Intron28_1	2	Plate1_r02c10f01p01-ch1sk1fk1fl1.tiff
B10_F1R1	B10	Plate 1	ACLY_Intron10_1	ACLY	1	56	53	>4	1.9	1.8	TTYH3;KDM6A	TTYH3_Intron13_1;KDM6A_Intron28_1	2	Plate1_r02c10f01p01-ch1sk1fk1fl1.tiff
B10_F1R1	B10	Plate 1	DARS2_Intron9_1	DARS2	1	80	53	>4	1.9	1.3	TTYH3;KDM6A	TTYH3_Intron13_1;KDM6A_Intron28_1	2	Plate1_r02c10f01p01-ch1sk1fk1fl1.tiff
B10_F1R1	B10	Plate 1	ANGPTL4_Intron1_1	ANGPTL4	1	33	53	>4	1.9	3	TTYH3;KDM6A	TTYH3_Intron13_1;KDM6A_Intron28_1	2	Plate1_r02c10f01p01-ch1sk1fk1fl1.tiff
B10_F1R1	B10	Plate 1	NDUFV2_Intron1_1	NDUFV2	1	49	53	>4	1.9	2	TTYH3;KDM6A	TTYH3_Intron13_1;KDM6A_Intron28_1	2	Plate1_r02c10f01p01-ch1sk1fk1fl1.tiff
B10_F1R1	B10	Plate 1	KMT5A_Intron2_1	KMT5A	1	141	53	>4	1.9	0.7	TTYH3;KDM6A	TTYH3_Intron13_1;KDM6A_Intron28_1	2	Plate1_r02c10f01p01-ch1sk1fk1fl1.tiff
B10_F1R1	B10	Plate 1	SET_Intron6_1	SET	1	39	53	>4	1.9	2.6	TTYH3;KDM6A	TTYH3_Intron13_1;KDM6A_Intron28_1	2	Plate1_r02c10f01p01-ch1sk1fk1fl1.tiff
B10_F1R1	B10	Plate 1	MOV10L1_Intron25_1	MOV10L1	1	61	53	>4	1.9	1.6	TTYH3;KDM6A	TTYH3_Intron13_1;KDM6A_Intron28_1	2	Plate1_r02c10f01p01-ch1sk1fk1fl1.tiff
B10_F1R1	B10	Plate 1	KARS_Intron6_1	KARS	1	30	53	>4	1.9	3.3	TTYH3;KDM6A	TTYH3_Intron13_1;KDM6A_Intron28_1	2	Plate1_r02c10f01p01-ch1sk1fk1fl1.tiff
B10_F1R1	B10	Plate 1	SDHA_Intron9_1	SDHA	1	31	53	>4	1.9	3.2	TTYH3;KDM6A	TTYH3_Intron13_1;KDM6A_Intron28_1	2	Plate1_r02c10f01p01-ch1sk1fk1fl1.tiff
B10_F1R1	B10	Plate 1	JMJD8_Intron8_1	JMJD8	1	43	53	>4	1.9	2.3	TTYH3;KDM6A	TTYH3_Intron13_1;KDM6A_Intron28_1	2	Plate1_r02c10f01p01-ch1sk1fk1fl1.tiff
B10_F1R1	B10	Plate 1	HCFC1_Intron18_1	HCFC1	1	37	53	>4	1.9	2.7	TTYH3;KDM6A	TTYH3_Intron13_1;KDM6A_Intron28_1	2	Plate1_r02c10f01p01-ch1sk1fk1fl1.tiff
B10_F1R1	B10	Plate 1	ERI1_Intron1_1	ERI1	1	63	53	>4	1.9	1.6	TTYH3;KDM6A	TTYH3_Intron13_1;KDM6A_Intron28_1	2	Plate1_r02c10f01p01-ch1sk1fk1fl1.tiff
B10_F1R1	B10	Plate 1	SEPHS1_Intron6_1	SEPHS1	1	84	53	>4	1.9	1.2	TTYH3;KDM6A	TTYH3_Intron13_1;KDM6A_Intron28_1	2	Plate1_r02c10f01p01-ch1sk1fk1fl1.tiff
B10_F1R1	B10	Plate 1	LMF1_Intron6_1	LMF1	1	39	53	>4	1.9	2.6	TTYH3;KDM6A	TTYH3_Intron13_1;KDM6A_Intron28_1	2	Plate1_r02c10f01p01-ch1sk1fk1fl1.tiff
B10_F1R1	B10	Plate 1	APOO_Intron1_1	APOO	1	32	53	>4	1.9	3.1	TTYH3;KDM6A	TTYH3_Intron13_1;KDM6A_Intron28_1	2	Plate1_r02c10f01p01-ch1sk1fk1fl1.tiff
B10_F1R2	B10	Plate 4	UQCRC2_Intron11_1	UQCRC2	21	86	26	1	80.8	24.4	UQCRC2	UQCRC2_Intron11_1	1	Plate4_r02c10f01p01-ch1sk1fk1fl1.tiff
B10_F1R2	B10	Plate 4	PHGDH_Intron10_1	PHGDH	1	32	26	2	3.8	3.1	UQCRC2	UQCRC2_Intron11_1	1	Plate4_r02c10f01p01-ch1sk1fk1fl1.tiff
B10_F1R2	B10	Plate 4	KMT5A_Intron2_1	KMT5A	1	141	26	3	3.8	0.7	UQCRC2	UQCRC2_Intron11_1	1	Plate4_r02c10f01p01-ch1sk1fk1fl1.tiff
B10_F1R2	B10	Plate 4	NDUFB6_Intron2_2	NDUFB6	1	18	26	4	3.8	5.6	UQCRC2	UQCRC2_Intron11_1	1	Plate4_r02c10f01p01-ch1sk1fk1fl1.tiff
B10_F1R2	B10	Plate 4	LMF1_Intron6_1	LMF1	1	39	26	>4	3.8	2.6	UQCRC2	UQCRC2_Intron11_1	1	Plate4_r02c10f01p01-ch1sk1fk1fl1.tiff
B10_F1R2	B10	Plate 4	PYGO2_Intron2_2	PYGO2	1	87	26	>4	3.8	1.1	UQCRC2	UQCRC2_Intron11_1	1	Plate4_r02c10f01p01-ch1sk1fk1fl1.tiff
B10_F1R3	B10	Plate 7	ERI1_Intron1_1	ERI1	26	63	29	1	89.7	41.3	ERI1	ERI1_Intron1_1	1	Plate7_r02c10f01p01-ch1sk1fk1fl1.tiff
B10_F1R3	B10	Plate 7	ACLY_Intron10_1	ACLY	1	56	29	2	3.4	1.8	ERI1	ERI1_Intron1_1	1	Plate7_r02c10f01p01-ch1sk1fk1fl1.tiff
B10_F1R3	B10	Plate 7	TNFRSF1A_Intron1_2	TNFRSF1A	1	16	29	3	3.4	6.3	ERI1	ERI1_Intron1_1	1	Plate7_r02c10f01p01-ch1sk1fk1fl1.tiff
B10_F1R3	B10	Plate 7	LMF1_Intron6_1	LMF1	1	39	29	4	3.4	2.6	ERI1	ERI1_Intron1_1	1	Plate7_r02c10f01p01-ch1sk1fk1fl1.tiff
B10_F2R1	B10	Plate 2	IDE_Intron13_1	IDE	51	94	59	1	86.4	54.3	IDE	IDE_Intron13_1	1	Plate2_r02c10f01p01-ch1sk1fk1fl1.tiff
B10_F2R1	B10	Plate 2	PCGF6_Intron1_1	PCGF6	1	56	59	2	1.7	1.8	IDE	IDE_Intron13_1	1	Plate2_r02c10f01p01-ch1sk1fk1fl1.tiff
B10_F2R1	B10	Plate 2	HMGA2_Intron1_1	HMGA2	1	93	59	3	1.7	1.1	IDE	IDE_Intron13_1	1	Plate2_r02c10f01p01-ch1sk1fk1fl1.tiff
B10_F2R1	B10	Plate 2	GLO1_Intron1_2	GLO1	1	43	59	4	1.7	2.3	IDE	IDE_Intron13_1	1	Plate2_r02c10f01p01-ch1sk1fk1fl1.tiff
B10_F2R1	B10	Plate 2	MBOAT2_Intron9_1	MBOAT2	1	49	59	>4	1.7	2	IDE	IDE_Intron13_1	1	Plate2_r02c10f01p01-ch1sk1fk1fl1.tiff
B10_F2R1	B10	Plate 2	GSR_Intron4_1	GSR	1	82	59	>4	1.7	1.2	IDE	IDE_Intron13_1	1	Plate2_r02c10f01p01-ch1sk1fk1fl1.tiff
B10_F2R1	B10	Plate 2	PPOX_Intron2_1	PPOX	1	50	59	>4	1.7	2	IDE	IDE_Intron13_1	1	Plate2_r02c10f01p01-ch1sk1fk1fl1.tiff
B10_F2R1	B10	Plate 2	PANK3_Intron2_1	PANK3	1	47	59	>4	1.7	2.1	IDE	IDE_Intron13_1	1	Plate2_r02c10f01p01-ch1sk1fk1fl1.tiff
B10_F2R1	B10	Plate 2	GALNT6_Intron7_1	GALNT6	1	78	59	>4	1.7	1.3	IDE	IDE_Intron13_1	1	Plate2_r02c10f01p01-ch1sk1fk1fl1.tiff
B10_F2R2	B10	Plate 5	PPOX_Intron2_1	PPOX	10	50	26	1	38.5	20				Plate5_r02c10f01p01-ch1sk1fk1fl1.tiff
B10_F2R2	B10	Plate 5	MAGT1_Intron6_1	MAGT1	8	57	26	2	30.8	14				Plate5_r02c10f01p01-ch1sk1fk1fl1.tiff
B10_F2R2	B10	Plate 5	ASXL1_Intron1_1	ASXL1	1	75	26	3	3.8	1.3				Plate5_r02c10f01p01-ch1sk1fk1fl1.tiff
B10_F2R2	B10	Plate 5	MBOAT2_Intron9_1	MBOAT2	1	49	26	4	3.8	2				Plate5_r02c10f01p01-ch1sk1fk1fl1.tiff
B10_F2R2	B10	Plate 5	GPD2_Intron2_1	GPD2	1	41	26	>4	3.8	2.4				Plate5_r02c10f01p01-ch1sk1fk1fl1.tiff
B10_F2R2	B10	Plate 5	PLOD3_Intron8_1	PLOD3	1	90	26	>4	3.8	1.1				Plate5_r02c10f01p01-ch1sk1fk1fl1.tiff
B10_F2R2	B10	Plate 5	GSR_Intron4_1	GSR	1	82	26	>4	3.8	1.2				Plate5_r02c10f01p01-ch1sk1fk1fl1.tiff
B10_F2R2	B10	Plate 5	NDUFAF2_Intron3_3	NDUFAF2	1	22	26	>4	3.8	4.5				Plate5_r02c10f01p01-ch1sk1fk1fl1.tiff
B10_F2R2	B10	Plate 5	PTEN_Intron8_1	PTEN	1	39	26	>4	3.8	2.6				Plate5_r02c10f01p01-ch1sk1fk1fl1.tiff
B10_F2R2	B10	Plate 5	MAP3K12_Intron14_2	MAP3K12	1	27	26	>4	3.8	3.7				Plate5_r02c10f01p01-ch1sk1fk1fl1.tiff
B10_F2R3	B10	Plate 8	PLOD3_Intron8_1	PLOD3	1	90	1	1	100	1.1
B10_F3R1	B10	Plate 3	PHF10_Intron6_1	PHF10	25	35	37	1	67.6	71.4	PHF10	PHF10_Intron6_1	1	Plate3_r02c10f01p01-ch1sk1fk1fl1.tiff
B10_F3R1	B10	Plate 3	MTHFD1_Intron22_2	MTHFD1	5	74	37	2	13.5	6.8	PHF10	PHF10_Intron6_1	1	Plate3_r02c10f01p01-ch1sk1fk1fl1.tiff
B10_F3R1	B10	Plate 3	HUWE1_Intron12_1	HUWE1	1	57	37	3	2.7	1.8	PHF10	PHF10_Intron6_1	1	Plate3_r02c10f01p01-ch1sk1fk1fl1.tiff
B10_F3R1	B10	Plate 3	P4HB_Intron10_1	P4HB	1	47	37	4	2.7	2.1	PHF10	PHF10_Intron6_1	1	Plate3_r02c10f01p01-ch1sk1fk1fl1.tiff
B10_F3R1	B10	Plate 3	HMGA2_Intron1_1	HMGA2	1	93	37	>4	2.7	1.1	PHF10	PHF10_Intron6_1	1	Plate3_r02c10f01p01-ch1sk1fk1fl1.tiff
B10_F3R1	B10	Plate 3	FMR1_Intron8_1	FMR1	1	70	37	>4	2.7	1.4	PHF10	PHF10_Intron6_1	1	Plate3_r02c10f01p01-ch1sk1fk1fl1.tiff
B10_F3R1	B10	Plate 3	SDHA_Intron9_1	SDHA	1	31	37	>4	2.7	3.2	PHF10	PHF10_Intron6_1	1	Plate3_r02c10f01p01-ch1sk1fk1fl1.tiff
B10_F3R1	B10	Plate 3	HSD17B10_Intron4_1	HSD17B10	1	73	37	>4	2.7	1.4	PHF10	PHF10_Intron6_1	1	Plate3_r02c10f01p01-ch1sk1fk1fl1.tiff
B10_F3R1	B10	Plate 3	PLB1_Intron15_1	PLB1	1	4	37	>4	2.7	25	PHF10	PHF10_Intron6_1	1	Plate3_r02c10f01p01-ch1sk1fk1fl1.tiff
B10_F3R2	B10	Plate 6	NDUFAF2_Intron3_3	NDUFAF2	18	22	24	1	75	81.8	NDUFAF2	NDUFAF2_Intron3_3	1	Plate6_r02c10f01p01-ch1sk1fk1fl1.tiff
B10_F3R2	B10	Plate 6	CTR9_Intron1_1	CTR9	2	180	24	2	8.3	1.1	NDUFAF2	NDUFAF2_Intron3_3	1	Plate6_r02c10f01p01-ch1sk1fk1fl1.tiff
B10_F3R2	B10	Plate 6	FMR1_Intron8_1	FMR1	1	70	24	3	4.2	1.4	NDUFAF2	NDUFAF2_Intron3_3	1	Plate6_r02c10f01p01-ch1sk1fk1fl1.tiff
B10_F3R2	B10	Plate 6	NDUFB6_Intron2_2	NDUFB6	1	18	24	4	4.2	5.6	NDUFAF2	NDUFAF2_Intron3_3	1	Plate6_r02c10f01p01-ch1sk1fk1fl1.tiff
B10_F3R2	B10	Plate 6	HADHA_Intron10_1	HADHA	1	42	24	>4	4.2	2.4	NDUFAF2	NDUFAF2_Intron3_3	1	Plate6_r02c10f01p01-ch1sk1fk1fl1.tiff
B10_F3R2	B10	Plate 6	APOO_Intron1_1	APOO	1	32	24	>4	4.2	3.1	NDUFAF2	NDUFAF2_Intron3_3	1	Plate6_r02c10f01p01-ch1sk1fk1fl1.tiff
B10_F3R3	B10	Plate 9	NDUFV2_Intron2_1	NDUFV2	1	36	2	1	50	2.8
B10_F3R3	B10	Plate 9	ACLY_Intron16_1	ACLY	1	25	2	2	50	4
B11_F1R1	B11	Plate 1	GSS_Intron9_1	GSS	26	40	75	1	34.7	65	GSS;JMJD8;OBSCN	GSS_Intron9_1;JMJD8_Intron8_1;OBSCN_Intron66_1	3	Plate1_r02c11f01p01-ch1sk1fk1fl1.tiff
B11_F1R1	B11	Plate 1	JMJD8_Intron8_1	JMJD8	19	43	75	2	25.3	44.2	GSS;JMJD8;OBSCN	GSS_Intron9_1;JMJD8_Intron8_1;OBSCN_Intron66_1	3	Plate1_r02c11f01p01-ch1sk1fk1fl1.tiff
B11_F1R1	B11	Plate 1	OBSCN_Intron66_1	OBSCN	18	26	75	3	24	69.2	GSS;JMJD8;OBSCN	GSS_Intron9_1;JMJD8_Intron8_1;OBSCN_Intron66_1	3	Plate1_r02c11f01p01-ch1sk1fk1fl1.tiff
B11_F1R1	B11	Plate 1	CYP3A4_Intron12_1	CYP3A4	7	7	75	4	9.3	100	GSS;JMJD8;OBSCN	GSS_Intron9_1;JMJD8_Intron8_1;OBSCN_Intron66_1	3	Plate1_r02c11f01p01-ch1sk1fk1fl1.tiff
B11_F1R1	B11	Plate 1	ACLY_Intron7_1	ACLY	1	68	75	>4	1.3	1.5	GSS;JMJD8;OBSCN	GSS_Intron9_1;JMJD8_Intron8_1;OBSCN_Intron66_1	3	Plate1_r02c11f01p01-ch1sk1fk1fl1.tiff
B11_F1R1	B11	Plate 1	AURKA_Intron3_1	AURKA	1	38	75	>4	1.3	2.6	GSS;JMJD8;OBSCN	GSS_Intron9_1;JMJD8_Intron8_1;OBSCN_Intron66_1	3	Plate1_r02c11f01p01-ch1sk1fk1fl1.tiff
B11_F1R1	B11	Plate 1	LTA4H_Intron13_1	LTA4H	1	28	75	>4	1.3	3.6	GSS;JMJD8;OBSCN	GSS_Intron9_1;JMJD8_Intron8_1;OBSCN_Intron66_1	3	Plate1_r02c11f01p01-ch1sk1fk1fl1.tiff
B11_F1R1	B11	Plate 1	BLVRA_Intron2_1	BLVRA	1	24	75	>4	1.3	4.2	GSS;JMJD8;OBSCN	GSS_Intron9_1;JMJD8_Intron8_1;OBSCN_Intron66_1	3	Plate1_r02c11f01p01-ch1sk1fk1fl1.tiff
B11_F1R1	B11	Plate 1	RUVBL1_Intron1_1	RUVBL1	1	55	75	>4	1.3	1.8	GSS;JMJD8;OBSCN	GSS_Intron9_1;JMJD8_Intron8_1;OBSCN_Intron66_1	3	Plate1_r02c11f01p01-ch1sk1fk1fl1.tiff
B11_F1R2	B11	Plate 4	BRPF3_Intron9_1	BRPF3	24	30	41	1	58.5	80	BRPF3	BRPF3_Intron9_1	1	Plate4_r02c11f01p01-ch1sk1fk1fl1.tiff
B11_F1R2	B11	Plate 4	SUPT6H_Intron19_1	SUPT6H	5	8	41	2	12.2	62.5	BRPF3	BRPF3_Intron9_1	1	Plate4_r02c11f01p01-ch1sk1fk1fl1.tiff
B11_F1R2	B11	Plate 4	SUCLG2_Intron1_1	SUCLG2	3	3	41	3	7.3	100	BRPF3	BRPF3_Intron9_1	1	Plate4_r02c11f01p01-ch1sk1fk1fl1.tiff
B11_F1R2	B11	Plate 4	ALDH7A1_Intron1_1	ALDH7A1	1	81	41	4	2.4	1.2	BRPF3	BRPF3_Intron9_1	1	Plate4_r02c11f01p01-ch1sk1fk1fl1.tiff
B11_F1R2	B11	Plate 4	AURKA_Intron3_1	AURKA	1	38	41	>4	2.4	2.6	BRPF3	BRPF3_Intron9_1	1	Plate4_r02c11f01p01-ch1sk1fk1fl1.tiff
B11_F1R2	B11	Plate 4	GSS_Intron9_1	GSS	1	40	41	>4	2.4	2.5	BRPF3	BRPF3_Intron9_1	1	Plate4_r02c11f01p01-ch1sk1fk1fl1.tiff
B11_F1R2	B11	Plate 4	JMJD8_Intron8_1	JMJD8	1	43	41	>4	2.4	2.3	BRPF3	BRPF3_Intron9_1	1	Plate4_r02c11f01p01-ch1sk1fk1fl1.tiff
B11_F1R2	B11	Plate 4	ERI1_Intron1_1	ERI1	1	63	41	>4	2.4	1.6	BRPF3	BRPF3_Intron9_1	1	Plate4_r02c11f01p01-ch1sk1fk1fl1.tiff
B11_F1R2	B11	Plate 4	CUL4B_Intron20_1	CUL4B	1	94	41	>4	2.4	1.1	BRPF3	BRPF3_Intron9_1	1	Plate4_r02c11f01p01-ch1sk1fk1fl1.tiff
B11_F1R2	B11	Plate 4	PYGO2_Intron2_2	PYGO2	1	87	41	>4	2.4	1.1	BRPF3	BRPF3_Intron9_1	1	Plate4_r02c11f01p01-ch1sk1fk1fl1.tiff
B11_F1R2	B11	Plate 4	GALNT6_Intron7_1	GALNT6	1	78	41	>4	2.4	1.3	BRPF3	BRPF3_Intron9_1	1	Plate4_r02c11f01p01-ch1sk1fk1fl1.tiff
B11_F1R2	B11	Plate 4	PARK7_Intron4_2	PARK7	1	139	41	>4	2.4	0.7	BRPF3	BRPF3_Intron9_1	1	Plate4_r02c11f01p01-ch1sk1fk1fl1.tiff
B11_F1R3	B11	Plate 7	ECHS1_Intron7_2	ECHS1	18	27	19	1	94.7	66.7	ECHS1	ECHS1_Intron7_2	1	Plate7_r02c11f01p01-ch1sk1fk1fl1.tiff
B11_F1R3	B11	Plate 7	ALDH9A1_Intron6_1	ALDH9A1	1	101	19	2	5.3	1	ECHS1	ECHS1_Intron7_2	1	Plate7_r02c11f01p01-ch1sk1fk1fl1.tiff
B11_F2R1	B11	Plate 2	SNCA_Intron4_1	SNCA	14	25	21	1	66.7	56	SNCA	SNCA_Intron4_1	1	Plate2_r02c11f01p01-ch1sk1fk1fl1.tiff
B11_F2R1	B11	Plate 2	RCOR1_Intron4_1	RCOR1	1	22	21	2	4.8	4.5	SNCA	SNCA_Intron4_1	1	Plate2_r02c11f01p01-ch1sk1fk1fl1.tiff
B11_F2R1	B11	Plate 2	PHKB_Intron25_1	PHKB	1	4	21	3	4.8	25	SNCA	SNCA_Intron4_1	1	Plate2_r02c11f01p01-ch1sk1fk1fl1.tiff
B11_F2R1	B11	Plate 2	SDHA_Intron9_1	SDHA	1	31	21	4	4.8	3.2	SNCA	SNCA_Intron4_1	1	Plate2_r02c11f01p01-ch1sk1fk1fl1.tiff
B11_F2R1	B11	Plate 2	GSS_Intron2_1	GSS	1	47	21	>4	4.8	2.1	SNCA	SNCA_Intron4_1	1	Plate2_r02c11f01p01-ch1sk1fk1fl1.tiff
B11_F2R1	B11	Plate 2	RTF1_Intron2_1	RTF1	1	45	21	>4	4.8	2.2	SNCA	SNCA_Intron4_1	1	Plate2_r02c11f01p01-ch1sk1fk1fl1.tiff
B11_F2R1	B11	Plate 2	CS_Intron10_1	CS	1	66	21	>4	4.8	1.5	SNCA	SNCA_Intron4_1	1	Plate2_r02c11f01p01-ch1sk1fk1fl1.tiff
B11_F2R1	B11	Plate 2	TAF9B_Intron1_2	TAF9B	1	87	21	>4	4.8	1.1	SNCA	SNCA_Intron4_1	1	Plate2_r02c11f01p01-ch1sk1fk1fl1.tiff
B11_F2R2	B11	Plate 5	MPHOSPH8_Intron1_1	MPHOSPH8	2	3	4	1	50	66.7				Plate5_r02c11f01p01-ch1sk1fk1fl1.tiff
B11_F2R2	B11	Plate 5	PYGO2_Intron2_2	PYGO2	1	87	4	2	25	1.1				Plate5_r02c11f01p01-ch1sk1fk1fl1.tiff
B11_F2R2	B11	Plate 5	NSDHL_Intron2_1	NSDHL	1	5	4	3	25	20				Plate5_r02c11f01p01-ch1sk1fk1fl1.tiff
B11_F2R3	B11	Plate 8	FUBP3_Intron7_1	FUBP3	1	15	3	1	33.3	6.7
B11_F2R3	B11	Plate 8	VPS4A_Intron9_1	VPS4A	1	17	3	2	33.3	5.9
B11_F2R3	B11	Plate 8	ALDH1A2_Intron6_1	ALDH1A2	1	8	3	3	33.3	12.5
B11_F3R1	B11	Plate 3	APRT_Intron3_1	APRT	23	30	33	1	69.7	76.7	APRT	APRT_Intron3_1	1	Plate3_r02c11f01p01-ch1sk1fk1fl1.tiff
B11_F3R1	B11	Plate 3	ALDH18A1_Intron12_1	ALDH18A1	1	49	33	2	3	2	APRT	APRT_Intron3_1	1	Plate3_r02c11f01p01-ch1sk1fk1fl1.tiff
B11_F3R1	B11	Plate 3	ACAT1_Intron1_1	ACAT1	1	37	33	3	3	2.7	APRT	APRT_Intron3_1	1	Plate3_r02c11f01p01-ch1sk1fk1fl1.tiff
B11_F3R1	B11	Plate 3	SDHB_Intron7_1	SDHB	1	30	33	4	3	3.3	APRT	APRT_Intron3_1	1	Plate3_r02c11f01p01-ch1sk1fk1fl1.tiff
B11_F3R1	B11	Plate 3	BRD8_Intron13_1	BRD8	1	22	33	>4	3	4.5	APRT	APRT_Intron3_1	1	Plate3_r02c11f01p01-ch1sk1fk1fl1.tiff
B11_F3R1	B11	Plate 3	NOC2L_Intron16_1	NOC2L	1	21	33	>4	3	4.8	APRT	APRT_Intron3_1	1	Plate3_r02c11f01p01-ch1sk1fk1fl1.tiff
B11_F3R1	B11	Plate 3	LRRK2_Intron46_1	LRRK2	1	24	33	>4	3	4.2	APRT	APRT_Intron3_1	1	Plate3_r02c11f01p01-ch1sk1fk1fl1.tiff
B11_F3R1	B11	Plate 3	SUCLA2_Intron10_1	SUCLA2	1	19	33	>4	3	5.3	APRT	APRT_Intron3_1	1	Plate3_r02c11f01p01-ch1sk1fk1fl1.tiff
B11_F3R1	B11	Plate 3	ATAD3A_Intron4_1	ATAD3A	1	185	33	>4	3	0.5	APRT	APRT_Intron3_1	1	Plate3_r02c11f01p01-ch1sk1fk1fl1.tiff
B11_F3R1	B11	Plate 3	PAX7_Intron7_2	PAX7	1	32	33	>4	3	3.1	APRT	APRT_Intron3_1	1	Plate3_r02c11f01p01-ch1sk1fk1fl1.tiff
B11_F3R1	B11	Plate 3	ITPA_Intron1_2	ITPA	1	31	33	>4	3	3.2	APRT	APRT_Intron3_1	1	Plate3_r02c11f01p01-ch1sk1fk1fl1.tiff
B11_F3R2	B11	Plate 6	PLOD3_Intron8_1	PLOD3	9	90	23	1	39.1	10				Plate6_r02c11f01p01-ch1sk1fk1fl1.tiff
B11_F3R2	B11	Plate 6	EPHX4_Intron1_1	EPHX4	8	43	23	2	34.8	18.6				Plate6_r02c11f01p01-ch1sk1fk1fl1.tiff
B11_F3R2	B11	Plate 6	PFKL_Intron12_1	PFKL	1	27	23	3	4.3	3.7				Plate6_r02c11f01p01-ch1sk1fk1fl1.tiff
B11_F3R2	B11	Plate 6	NNT_Intron9_1	NNT	1	30	23	4	4.3	3.3				Plate6_r02c11f01p01-ch1sk1fk1fl1.tiff
B11_F3R2	B11	Plate 6	NAMPT_Intron3_1	NAMPT	1	98	23	>4	4.3	1				Plate6_r02c11f01p01-ch1sk1fk1fl1.tiff
B11_F3R2	B11	Plate 6	ETFA_Intron11_1	ETFA	1	25	23	>4	4.3	4				Plate6_r02c11f01p01-ch1sk1fk1fl1.tiff
B11_F3R2	B11	Plate 6	UPP1_Intron5_2	UPP1	1	26	23	>4	4.3	3.8				Plate6_r02c11f01p01-ch1sk1fk1fl1.tiff
B11_F3R2	B11	Plate 6	SUCLA2_Intron10_1	SUCLA2	1	19	23	>4	4.3	5.3				Plate6_r02c11f01p01-ch1sk1fk1fl1.tiff
B11_F3R3	B11	Plate 9	SNCA_Intron4_1	SNCA	1	25	1	1	100	4
B12_F1R1	B12	Plate 1	PRPS1_Intron2_2	PRPS1	15	139	25	1	60	10.8	PRPS1	PRPS1_Intron2_2	1	Plate1_r02c12f01p01-ch1sk1fk1fl1.tiff
B12_F1R1	B12	Plate 1	USP3_Intron5_1	USP3	2	27	25	2	8	7.4	PRPS1	PRPS1_Intron2_2	1	Plate1_r02c12f01p01-ch1sk1fk1fl1.tiff
B12_F1R1	B12	Plate 1	NUDT14_Intron1_1	NUDT14	1	61	25	3	4	1.6	PRPS1	PRPS1_Intron2_2	1	Plate1_r02c12f01p01-ch1sk1fk1fl1.tiff
B12_F1R1	B12	Plate 1	RPA1_Intron9_1	RPA1	1	16	25	4	4	6.3	PRPS1	PRPS1_Intron2_2	1	Plate1_r02c12f01p01-ch1sk1fk1fl1.tiff
B12_F1R1	B12	Plate 1	KMT5A_Intron2_1	KMT5A	1	141	25	>4	4	0.7	PRPS1	PRPS1_Intron2_2	1	Plate1_r02c12f01p01-ch1sk1fk1fl1.tiff
B12_F1R1	B12	Plate 1	GSS_Intron9_1	GSS	1	40	25	>4	4	2.5	PRPS1	PRPS1_Intron2_2	1	Plate1_r02c12f01p01-ch1sk1fk1fl1.tiff
B12_F1R1	B12	Plate 1	QARS_Intron3_1	QARS	1	36	25	>4	4	2.8	PRPS1	PRPS1_Intron2_2	1	Plate1_r02c12f01p01-ch1sk1fk1fl1.tiff
B12_F1R1	B12	Plate 1	KDM6A_Intron28_1	KDM6A	1	14	25	>4	4	7.1	PRPS1	PRPS1_Intron2_2	1	Plate1_r02c12f01p01-ch1sk1fk1fl1.tiff
B12_F1R1	B12	Plate 1	CYC1_Intron1_1	CYC1	1	71	25	>4	4	1.4	PRPS1	PRPS1_Intron2_2	1	Plate1_r02c12f01p01-ch1sk1fk1fl1.tiff
B12_F1R1	B12	Plate 1	ACLY_Intron7_1	ACLY	1	68	25	>4	4	1.5	PRPS1	PRPS1_Intron2_2	1	Plate1_r02c12f01p01-ch1sk1fk1fl1.tiff
B12_F1R2	B12	Plate 4	PTEN_Intron8_1	PTEN	2	39	5	1	40	5.1				Plate4_r02c12f01p01-ch1sk1fk1fl1.tiff
B12_F1R2	B12	Plate 4	HAGHL_Intron2_1	HAGHL	1	14	5	2	20	7.1				Plate4_r02c12f01p01-ch1sk1fk1fl1.tiff
B12_F1R2	B12	Plate 4	FMR1_Intron8_1	FMR1	1	70	5	3	20	1.4				Plate4_r02c12f01p01-ch1sk1fk1fl1.tiff
B12_F1R2	B12	Plate 4	TXNRD1_Intron13_1	TXNRD1	1	7	5	4	20	14.3				Plate4_r02c12f01p01-ch1sk1fk1fl1.tiff
B12_F1R3	B12	Plate 7	DDOST_Intron6_1	DDOST	7	9	9	1	77.8	77.8	DDOST	DDOST_Intron6_1	1	Plate7_r02c12f01p01-ch1sk1fk1fl1.tiff
B12_F1R3	B12	Plate 7	NTPCR_Intron3_2	NTPCR	1	3	9	2	11.1	33.3	DDOST	DDOST_Intron6_1	1	Plate7_r02c12f01p01-ch1sk1fk1fl1.tiff
B12_F1R3	B12	Plate 7	FH_Intron3_1	FH	1	100	9	3	11.1	1	DDOST	DDOST_Intron6_1	1	Plate7_r02c12f01p01-ch1sk1fk1fl1.tiff
B12_F2R1	B12	Plate 2	NARS2_Intron4_1	NARS2	5	7	16	1	31.3	71.4				Plate2_r02c12f01p01-ch1sk1fk1fl1.tiff
B12_F2R1	B12	Plate 2	PLB1_Intron15_1	PLB1	2	4	16	2	12.5	50				Plate2_r02c12f01p01-ch1sk1fk1fl1.tiff
B12_F2R1	B12	Plate 2	HUWE1_Intron12_1	HUWE1	1	57	16	3	6.3	1.8				Plate2_r02c12f01p01-ch1sk1fk1fl1.tiff
B12_F2R1	B12	Plate 2	P4HB_Intron10_1	P4HB	1	47	16	4	6.3	2.1				Plate2_r02c12f01p01-ch1sk1fk1fl1.tiff
B12_F2R1	B12	Plate 2	COX7A2_Intron2_1	COX7A2	1	31	16	>4	6.3	3.2				Plate2_r02c12f01p01-ch1sk1fk1fl1.tiff
B12_F2R1	B12	Plate 2	HMGA2_Intron1_1	HMGA2	1	93	16	>4	6.3	1.1				Plate2_r02c12f01p01-ch1sk1fk1fl1.tiff
B12_F2R1	B12	Plate 2	ENOX2_Intron13_1	ENOX2	1	10	16	>4	6.3	10				Plate2_r02c12f01p01-ch1sk1fk1fl1.tiff
B12_F2R1	B12	Plate 2	NUDT3_Intron1_2	NUDT3	1	29	16	>4	6.3	3.4				Plate2_r02c12f01p01-ch1sk1fk1fl1.tiff
B12_F2R1	B12	Plate 2	HCFC1_Intron18_1	HCFC1	1	37	16	>4	6.3	2.7				Plate2_r02c12f01p01-ch1sk1fk1fl1.tiff
B12_F2R1	B12	Plate 2	OAT_Intron6_1	OAT	1	121	16	>4	6.3	0.8				Plate2_r02c12f01p01-ch1sk1fk1fl1.tiff
B12_F2R1	B12	Plate 2	GARS_Intron1_1	GARS	1	62	16	>4	6.3	1.6				Plate2_r02c12f01p01-ch1sk1fk1fl1.tiff
B12_F2R2	B12	Plate 5	ADH5_Intron2_1	ADH5	5	11	13	1	38.5	45.5				Plate5_r02c12f01p01-ch1sk1fk1fl1.tiff
B12_F2R2	B12	Plate 5	PTGR1_Intron9_1	PTGR1	4	9	13	2	30.8	44.4				Plate5_r02c12f01p01-ch1sk1fk1fl1.tiff
B12_F2R2	B12	Plate 5	UGT1A10_Intron1_1	UGT1A10	1	10	13	3	7.7	10				Plate5_r02c12f01p01-ch1sk1fk1fl1.tiff
B12_F2R2	B12	Plate 5	TRMT6_Intron7_1	TRMT6	1	23	13	4	7.7	4.3				Plate5_r02c12f01p01-ch1sk1fk1fl1.tiff
B12_F2R2	B12	Plate 5	NDUFAF2_Intron3_3	NDUFAF2	1	22	13	>4	7.7	4.5				Plate5_r02c12f01p01-ch1sk1fk1fl1.tiff
B12_F2R2	B12	Plate 5	HADHA_Intron14_1	HADHA	1	43	13	>4	7.7	2.3				Plate5_r02c12f01p01-ch1sk1fk1fl1.tiff
B12_F2R3	B12	Plate 8	ERI1_Intron1_1	ERI1	1	63	1	1	100	1.6
B12_F3R1	B12	Plate 3	IDI1_Intron4_3	IDI1	14	100	16	1	87.5	14	IDI1	IDI1_Intron4_3	1	Plate3_r02c12f01p01-ch1sk1fk1fl1.tiff
B12_F3R1	B12	Plate 3	TXNDC5_Intron5_1	TXNDC5	1	63	16	2	6.3	1.6	IDI1	IDI1_Intron4_3	1	Plate3_r02c12f01p01-ch1sk1fk1fl1.tiff
B12_F3R1	B12	Plate 3	HMGA2_Intron1_1	HMGA2	1	93	16	3	6.3	1.1	IDI1	IDI1_Intron4_3	1	Plate3_r02c12f01p01-ch1sk1fk1fl1.tiff
B12_F3R2	B12	Plate 6	ECH1_Intron9_1	ECH1	12	35	13	1	92.3	34.3	ECH1	ECH1_Intron9_1	1	Plate6_r02c12f01p01-ch1sk1fk1fl1.tiff
B12_F3R2	B12	Plate 6	OXCT1_Intron1_1	OXCT1	1	34	13	2	7.7	2.9	ECH1	ECH1_Intron9_1	1	Plate6_r02c12f01p01-ch1sk1fk1fl1.tiff
B12_F3R3	B12	Plate 9	TXNDC5_Intron5_1	TXNDC5	1	63	2	1	50	1.6
B12_F3R3	B12	Plate 9	ERI1_Intron1_1	ERI1	1	63	2	2	50	1.6
B2_F1R1	B2	Plate 1	HMGA2_Intron1_1	HMGA2	62	93	76	1	81.6	66.7	HMGA2	HMGA2_Intron1_1	1	Plate1_r02c02f01p01-ch1sk1fk1fl1.tiff
B2_F1R1	B2	Plate 1	USP3_Intron5_1	USP3	2	27	76	2	2.6	7.4	HMGA2	HMGA2_Intron1_1	1	Plate1_r02c02f01p01-ch1sk1fk1fl1.tiff
B2_F1R1	B2	Plate 1	NUDT14_Intron1_1	NUDT14	2	61	76	3	2.6	3.3	HMGA2	HMGA2_Intron1_1	1	Plate1_r02c02f01p01-ch1sk1fk1fl1.tiff
B2_F1R1	B2	Plate 1	RPA1_Intron9_1	RPA1	1	16	76	4	1.3	6.3	HMGA2	HMGA2_Intron1_1	1	Plate1_r02c02f01p01-ch1sk1fk1fl1.tiff
B2_F1R1	B2	Plate 1	MTR_Intron7_1	MTR	1	57	76	>4	1.3	1.8	HMGA2	HMGA2_Intron1_1	1	Plate1_r02c02f01p01-ch1sk1fk1fl1.tiff
B2_F1R1	B2	Plate 1	NPC1_Intron13_1	NPC1	1	6	76	>4	1.3	16.7	HMGA2	HMGA2_Intron1_1	1	Plate1_r02c02f01p01-ch1sk1fk1fl1.tiff
B2_F1R1	B2	Plate 1	AASS_Intron8_1	AASS	1	33	76	>4	1.3	3	HMGA2	HMGA2_Intron1_1	1	Plate1_r02c02f01p01-ch1sk1fk1fl1.tiff
B2_F1R1	B2	Plate 1	HCFC1_Intron18_1	HCFC1	1	37	76	>4	1.3	2.7	HMGA2	HMGA2_Intron1_1	1	Plate1_r02c02f01p01-ch1sk1fk1fl1.tiff
B2_F1R1	B2	Plate 1	JMJD8_Intron8_1	JMJD8	1	43	76	>4	1.3	2.3	HMGA2	HMGA2_Intron1_1	1	Plate1_r02c02f01p01-ch1sk1fk1fl1.tiff
B2_F1R1	B2	Plate 1	HADHA_Intron10_1	HADHA	1	42	76	>4	1.3	2.4	HMGA2	HMGA2_Intron1_1	1	Plate1_r02c02f01p01-ch1sk1fk1fl1.tiff
B2_F1R1	B2	Plate 1	PANK3_Intron2_1	PANK3	1	47	76	>4	1.3	2.1	HMGA2	HMGA2_Intron1_1	1	Plate1_r02c02f01p01-ch1sk1fk1fl1.tiff
B2_F1R1	B2	Plate 1	DCXR_Intron2_2	DCXR	1	44	76	>4	1.3	2.3	HMGA2	HMGA2_Intron1_1	1	Plate1_r02c02f01p01-ch1sk1fk1fl1.tiff
B2_F1R1	B2	Plate 1	NME1_Intron3_2	NME1	1	44	76	>4	1.3	2.3	HMGA2	HMGA2_Intron1_1	1	Plate1_r02c02f01p01-ch1sk1fk1fl1.tiff
B2_F1R2	B2	Plate 4	SNW1_Intron12_1	SNW1	20	67	38	1	52.6	29.9	SNW1	SNW1_Intron12_1	1	Plate4_r02c02f01p01-ch1sk1fk1fl1.tiff
B2_F1R2	B2	Plate 4	ALDH7A1_Intron1_1	ALDH7A1	5	81	38	2	13.2	6.2	SNW1	SNW1_Intron12_1	1	Plate4_r02c02f01p01-ch1sk1fk1fl1.tiff
B2_F1R2	B2	Plate 4	UBE2N_Intron1_1	UBE2N	2	88	38	3	5.3	2.3	SNW1	SNW1_Intron12_1	1	Plate4_r02c02f01p01-ch1sk1fk1fl1.tiff
B2_F1R2	B2	Plate 4	PRDX6_Intron2_2	PRDX6	1	50	38	4	2.6	2	SNW1	SNW1_Intron12_1	1	Plate4_r02c02f01p01-ch1sk1fk1fl1.tiff
B2_F1R2	B2	Plate 4	ADH5_Intron2_1	ADH5	1	11	38	>4	2.6	9.1	SNW1	SNW1_Intron12_1	1	Plate4_r02c02f01p01-ch1sk1fk1fl1.tiff
B2_F1R2	B2	Plate 4	AASS_Intron8_1	AASS	1	33	38	>4	2.6	3	SNW1	SNW1_Intron12_1	1	Plate4_r02c02f01p01-ch1sk1fk1fl1.tiff
B2_F1R2	B2	Plate 4	BRPF3_Intron9_1	BRPF3	1	30	38	>4	2.6	3.3	SNW1	SNW1_Intron12_1	1	Plate4_r02c02f01p01-ch1sk1fk1fl1.tiff
B2_F1R2	B2	Plate 4	NDUFB6_Intron2_2	NDUFB6	1	18	38	>4	2.6	5.6	SNW1	SNW1_Intron12_1	1	Plate4_r02c02f01p01-ch1sk1fk1fl1.tiff
B2_F1R2	B2	Plate 4	ACOT7_Intron2_2	ACOT7	1	115	38	>4	2.6	0.9	SNW1	SNW1_Intron12_1	1	Plate4_r02c02f01p01-ch1sk1fk1fl1.tiff
B2_F1R2	B2	Plate 4	PPOX_Intron2_1	PPOX	1	50	38	>4	2.6	2	SNW1	SNW1_Intron12_1	1	Plate4_r02c02f01p01-ch1sk1fk1fl1.tiff
B2_F1R2	B2	Plate 4	UQCRC2_Intron11_1	UQCRC2	1	86	38	>4	2.6	1.2	SNW1	SNW1_Intron12_1	1	Plate4_r02c02f01p01-ch1sk1fk1fl1.tiff
B2_F1R2	B2	Plate 4	GLYR1_Intron10_1	GLYR1	1	49	38	>4	2.6	2	SNW1	SNW1_Intron12_1	1	Plate4_r02c02f01p01-ch1sk1fk1fl1.tiff
B2_F1R2	B2	Plate 4	EBPL_Intron1_1	EBPL	1	15	38	>4	2.6	6.7	SNW1	SNW1_Intron12_1	1	Plate4_r02c02f01p01-ch1sk1fk1fl1.tiff
B2_F1R2	B2	Plate 4	CS_Intron3_1	CS	1	53	38	>4	2.6	1.9	SNW1	SNW1_Intron12_1	1	Plate4_r02c02f01p01-ch1sk1fk1fl1.tiff
B2_F1R3	B2	Plate 7	NME1_Intron3_2	NME1	14	44	19	1	73.7	31.8	NME1	NME1_Intron3_2	1	Plate7_r02c02f01p01-ch1sk1fk1fl1.tiff
B2_F1R3	B2	Plate 7	ALDH9A1_Intron6_1	ALDH9A1	2	101	19	2	10.5	2	NME1	NME1_Intron3_2	1	Plate7_r02c02f01p01-ch1sk1fk1fl1.tiff
B2_F1R3	B2	Plate 7	RNF8_Intron1_1	RNF8	1	62	19	3	5.3	1.6	NME1	NME1_Intron3_2	1	Plate7_r02c02f01p01-ch1sk1fk1fl1.tiff
B2_F1R3	B2	Plate 7	ERI1_Intron1_1	ERI1	1	63	19	4	5.3	1.6	NME1	NME1_Intron3_2	1	Plate7_r02c02f01p01-ch1sk1fk1fl1.tiff
B2_F1R3	B2	Plate 7	NXN_Intron7_1	NXN	1	85	19	>4	5.3	1.2	NME1	NME1_Intron3_2	1	Plate7_r02c02f01p01-ch1sk1fk1fl1.tiff
B2_F2R1	B2	Plate 2	COX7A2_Intron2_2	COX7A2	23	28	31	1	74.2	82.1	COX7A2	COX7A2_Intron2_2	1	Plate2_r02c02f01p01-ch1sk1fk1fl1.tiff
B2_F2R1	B2	Plate 2	FLAD1_Intron5_2	FLAD1	1	9	31	2	3.2	11.1	COX7A2	COX7A2_Intron2_2	1	Plate2_r02c02f01p01-ch1sk1fk1fl1.tiff
B2_F2R1	B2	Plate 2	PDE12_Intron1_2	PDE12	1	36	31	3	3.2	2.8	COX7A2	COX7A2_Intron2_2	1	Plate2_r02c02f01p01-ch1sk1fk1fl1.tiff
B2_F2R1	B2	Plate 2	ACP2_Intron4_1	ACP2	1	7	31	4	3.2	14.3	COX7A2	COX7A2_Intron2_2	1	Plate2_r02c02f01p01-ch1sk1fk1fl1.tiff
B2_F2R1	B2	Plate 2	UAP1_Intron10_1	UAP1	1	10	31	>4	3.2	10	COX7A2	COX7A2_Intron2_2	1	Plate2_r02c02f01p01-ch1sk1fk1fl1.tiff
B2_F2R1	B2	Plate 2	CUL4B_Intron20_1	CUL4B	1	94	31	>4	3.2	1.1	COX7A2	COX7A2_Intron2_2	1	Plate2_r02c02f01p01-ch1sk1fk1fl1.tiff
B2_F2R1	B2	Plate 2	PHF10_Intron6_1	PHF10	1	35	31	>4	3.2	2.9	COX7A2	COX7A2_Intron2_2	1	Plate2_r02c02f01p01-ch1sk1fk1fl1.tiff
B2_F2R1	B2	Plate 2	DLAT_Intron4_1	DLAT	1	65	31	>4	3.2	1.5	COX7A2	COX7A2_Intron2_2	1	Plate2_r02c02f01p01-ch1sk1fk1fl1.tiff
B2_F2R1	B2	Plate 2	GARS_Intron1_1	GARS	1	62	31	>4	3.2	1.6	COX7A2	COX7A2_Intron2_2	1	Plate2_r02c02f01p01-ch1sk1fk1fl1.tiff
B2_F2R2	B2	Plate 5	RRM2B_Intron1_1	RRM2B	25	28	31	1	80.6	89.3	RRM2B	RRM2B_Intron1_1	1	Plate5_r02c02f01p01-ch1sk1fk1fl1.tiff
B2_F2R2	B2	Plate 5	EZH2_Intron2_1	EZH2	1	22	31	2	3.2	4.5	RRM2B	RRM2B_Intron1_1	1	Plate5_r02c02f01p01-ch1sk1fk1fl1.tiff
B2_F2R2	B2	Plate 5	NUDT5_Intron2_2	NUDT5	1	9	31	3	3.2	11.1	RRM2B	RRM2B_Intron1_1	1	Plate5_r02c02f01p01-ch1sk1fk1fl1.tiff
B2_F2R2	B2	Plate 5	MAGT1_Intron6_1	MAGT1	1	57	31	4	3.2	1.8	RRM2B	RRM2B_Intron1_1	1	Plate5_r02c02f01p01-ch1sk1fk1fl1.tiff
B2_F2R2	B2	Plate 5	ACOT7_Intron2_2	ACOT7	1	115	31	>4	3.2	0.9	RRM2B	RRM2B_Intron1_1	1	Plate5_r02c02f01p01-ch1sk1fk1fl1.tiff
B2_F2R2	B2	Plate 5	GSR_Intron1_1	GSR	1	45	31	>4	3.2	2.2	RRM2B	RRM2B_Intron1_1	1	Plate5_r02c02f01p01-ch1sk1fk1fl1.tiff
B2_F2R2	B2	Plate 5	HADHA_Intron10_1	HADHA	1	42	31	>4	3.2	2.4	RRM2B	RRM2B_Intron1_1	1	Plate5_r02c02f01p01-ch1sk1fk1fl1.tiff
B2_F2R3	B2	Plate 8	HADHA_Intron10_1	HADHA	13	42	23	1	56.5	31	HADHA	HADHA_Intron10_1	1	Plate8_r02c02f01p01-ch1sk1fk1fl1.tiff
B2_F2R3	B2	Plate 8	ACOT7_Intron2_2	ACOT7	10	115	23	2	43.5	8.7	HADHA	HADHA_Intron10_1	1	Plate8_r02c02f01p01-ch1sk1fk1fl1.tiff
B2_F3R1	B2	Plate 3	NUDT14_Intron1_1	NUDT14	45	61	56	1	80.4	73.8	NUDT14	NUDT14_Intron1_1	1	Plate3_r02c02f01p01-ch1sk1fk1fl1.tiff
B2_F3R1	B2	Plate 3	PRPS1_Intron2_2	PRPS1	2	139	56	2	3.6	1.4	NUDT14	NUDT14_Intron1_1	1	Plate3_r02c02f01p01-ch1sk1fk1fl1.tiff
B2_F3R1	B2	Plate 3	NOC2L_Intron4_1	NOC2L	1	24	56	3	1.8	4.2	NUDT14	NUDT14_Intron1_1	1	Plate3_r02c02f01p01-ch1sk1fk1fl1.tiff
B2_F3R1	B2	Plate 3	GMPS_Intron7_1	GMPS	1	51	56	4	1.8	2	NUDT14	NUDT14_Intron1_1	1	Plate3_r02c02f01p01-ch1sk1fk1fl1.tiff
B2_F3R1	B2	Plate 3	ARG2_Intron4_1	ARG2	1	41	56	>4	1.8	2.4	NUDT14	NUDT14_Intron1_1	1	Plate3_r02c02f01p01-ch1sk1fk1fl1.tiff
B2_F3R1	B2	Plate 3	DUOX1_Intron13_1	DUOX1	1	6	56	>4	1.8	16.7	NUDT14	NUDT14_Intron1_1	1	Plate3_r02c02f01p01-ch1sk1fk1fl1.tiff
B2_F3R1	B2	Plate 3	PANK3_Intron2_1	PANK3	1	47	56	>4	1.8	2.1	NUDT14	NUDT14_Intron1_1	1	Plate3_r02c02f01p01-ch1sk1fk1fl1.tiff
B2_F3R1	B2	Plate 3	NAMPT_Intron3_1	NAMPT	1	98	56	>4	1.8	1	NUDT14	NUDT14_Intron1_1	1	Plate3_r02c02f01p01-ch1sk1fk1fl1.tiff
B2_F3R1	B2	Plate 3	MOV10L1_Intron25_1	MOV10L1	1	61	56	>4	1.8	1.6	NUDT14	NUDT14_Intron1_1	1	Plate3_r02c02f01p01-ch1sk1fk1fl1.tiff
B2_F3R1	B2	Plate 3	HSD17B10_Intron4_1	HSD17B10	1	73	56	>4	1.8	1.4	NUDT14	NUDT14_Intron1_1	1	Plate3_r02c02f01p01-ch1sk1fk1fl1.tiff
B2_F3R1	B2	Plate 3	PYGO2_Intron2_2	PYGO2	1	87	56	>4	1.8	1.1	NUDT14	NUDT14_Intron1_1	1	Plate3_r02c02f01p01-ch1sk1fk1fl1.tiff
B2_F3R2	B2	Plate 6	PYGO2_Intron2_2	PYGO2	37	87	44	1	84.1	42.5	PYGO2	PYGO2_Intron2_2	1	Plate6_r02c02f01p01-ch1sk1fk1fl1.tiff
B2_F3R2	B2	Plate 6	PRDX6_Intron2_2	PRDX6	1	50	44	2	2.3	2	PYGO2	PYGO2_Intron2_2	1	Plate6_r02c02f01p01-ch1sk1fk1fl1.tiff
B2_F3R2	B2	Plate 6	KMT5A_Intron2_1	KMT5A	1	141	44	3	2.3	0.7	PYGO2	PYGO2_Intron2_2	1	Plate6_r02c02f01p01-ch1sk1fk1fl1.tiff
B2_F3R2	B2	Plate 6	PPOX_Intron2_1	PPOX	1	50	44	4	2.3	2	PYGO2	PYGO2_Intron2_2	1	Plate6_r02c02f01p01-ch1sk1fk1fl1.tiff
B2_F3R2	B2	Plate 6	EPHX4_Intron1_1	EPHX4	1	43	44	>4	2.3	2.3	PYGO2	PYGO2_Intron2_2	1	Plate6_r02c02f01p01-ch1sk1fk1fl1.tiff
B2_F3R2	B2	Plate 6	ATAD3B_Intron7_1	ATAD3B	1	31	44	>4	2.3	3.2	PYGO2	PYGO2_Intron2_2	1	Plate6_r02c02f01p01-ch1sk1fk1fl1.tiff
B2_F3R2	B2	Plate 6	UQCRC2_Intron11_1	UQCRC2	1	86	44	>4	2.3	1.2	PYGO2	PYGO2_Intron2_2	1	Plate6_r02c02f01p01-ch1sk1fk1fl1.tiff
B2_F3R2	B2	Plate 6	NME1_Intron3_2	NME1	1	44	44	>4	2.3	2.3	PYGO2	PYGO2_Intron2_2	1	Plate6_r02c02f01p01-ch1sk1fk1fl1.tiff
B2_F3R3	B2	Plate 9	UBE2N_Intron1_1	UBE2N	1	88	3	1	33.3	1.1
B2_F3R3	B2	Plate 9	NUDT14_Intron1_1	NUDT14	1	61	3	2	33.3	1.6
B2_F3R3	B2	Plate 9	DDB1_Intron18_1	DDB1	1	27	3	3	33.3	3.7
B3_F1R1	B3	Plate 1	P4HB_Intron10_1	P4HB	39	47	64	1	60.9	83	P4HB	P4HB_Intron10_1	1	Plate1_r02c03f01p01-ch1sk1fk1fl1.tiff
B3_F1R1	B3	Plate 1	CYB5R3_Intron2_1	CYB5R3	2	270	64	2	3.1	0.7	P4HB	P4HB_Intron10_1	1	Plate1_r02c03f01p01-ch1sk1fk1fl1.tiff
B3_F1R1	B3	Plate 1	DPYSL2_Intron7_1	DPYSL2	1	116	64	3	1.6	0.9	P4HB	P4HB_Intron10_1	1	Plate1_r02c03f01p01-ch1sk1fk1fl1.tiff
B3_F1R1	B3	Plate 1	NSUN2_Intron1_1	NSUN2	1	20	64	4	1.6	5	P4HB	P4HB_Intron10_1	1	Plate1_r02c03f01p01-ch1sk1fk1fl1.tiff
B3_F1R1	B3	Plate 1	ALDH9A1_Intron6_1	ALDH9A1	1	101	64	>4	1.6	1	P4HB	P4HB_Intron10_1	1	Plate1_r02c03f01p01-ch1sk1fk1fl1.tiff
B3_F1R1	B3	Plate 1	NDUFV2_Intron1_1	NDUFV2	1	49	64	>4	1.6	2	P4HB	P4HB_Intron10_1	1	Plate1_r02c03f01p01-ch1sk1fk1fl1.tiff
B3_F1R1	B3	Plate 1	HMGA2_Intron1_1	HMGA2	1	93	64	>4	1.6	1.1	P4HB	P4HB_Intron10_1	1	Plate1_r02c03f01p01-ch1sk1fk1fl1.tiff
B3_F1R1	B3	Plate 1	NUDT21_Intron4_1	NUDT21	1	32	64	>4	1.6	3.1	P4HB	P4HB_Intron10_1	1	Plate1_r02c03f01p01-ch1sk1fk1fl1.tiff
B3_F1R1	B3	Plate 1	MTR_Intron7_1	MTR	1	57	64	>4	1.6	1.8	P4HB	P4HB_Intron10_1	1	Plate1_r02c03f01p01-ch1sk1fk1fl1.tiff
B3_F1R1	B3	Plate 1	ACE_Intron2_2	ACE	1	39	64	>4	1.6	2.6	P4HB	P4HB_Intron10_1	1	Plate1_r02c03f01p01-ch1sk1fk1fl1.tiff
B3_F1R1	B3	Plate 1	DAGLA_Intron7_1	DAGLA	1	15	64	>4	1.6	6.7	P4HB	P4HB_Intron10_1	1	Plate1_r02c03f01p01-ch1sk1fk1fl1.tiff
B3_F1R1	B3	Plate 1	BRD8_Intron13_1	BRD8	1	22	64	>4	1.6	4.5	P4HB	P4HB_Intron10_1	1	Plate1_r02c03f01p01-ch1sk1fk1fl1.tiff
B3_F1R1	B3	Plate 1	SDHA_Intron9_1	SDHA	1	31	64	>4	1.6	3.2	P4HB	P4HB_Intron10_1	1	Plate1_r02c03f01p01-ch1sk1fk1fl1.tiff
B3_F1R1	B3	Plate 1	HSD17B10_Intron4_1	HSD17B10	1	73	64	>4	1.6	1.4	P4HB	P4HB_Intron10_1	1	Plate1_r02c03f01p01-ch1sk1fk1fl1.tiff
B3_F1R1	B3	Plate 1	CTR9_Intron1_1	CTR9	1	180	64	>4	1.6	0.6	P4HB	P4HB_Intron10_1	1	Plate1_r02c03f01p01-ch1sk1fk1fl1.tiff
B3_F1R1	B3	Plate 1	CYC1_Intron1_1	CYC1	1	71	64	>4	1.6	1.4	P4HB	P4HB_Intron10_1	1	Plate1_r02c03f01p01-ch1sk1fk1fl1.tiff
B3_F1R1	B3	Plate 1	AGL_Intron26_1	AGL	1	32	64	>4	1.6	3.1	P4HB	P4HB_Intron10_1	1	Plate1_r02c03f01p01-ch1sk1fk1fl1.tiff
B3_F1R1	B3	Plate 1	PRPS1_Intron2_2	PRPS1	1	139	64	>4	1.6	0.7	P4HB	P4HB_Intron10_1	1	Plate1_r02c03f01p01-ch1sk1fk1fl1.tiff
B3_F1R1	B3	Plate 1	PHF8_Intron21_1	PHF8	1	57	64	>4	1.6	1.8	P4HB	P4HB_Intron10_1	1	Plate1_r02c03f01p01-ch1sk1fk1fl1.tiff
B3_F1R1	B3	Plate 1	ATAD3A_Intron4_1	ATAD3A	1	185	64	>4	1.6	0.5	P4HB	P4HB_Intron10_1	1	Plate1_r02c03f01p01-ch1sk1fk1fl1.tiff
B3_F1R1	B3	Plate 1	GLYR1_Intron10_1	GLYR1	1	49	64	>4	1.6	2	P4HB	P4HB_Intron10_1	1	Plate1_r02c03f01p01-ch1sk1fk1fl1.tiff
B3_F1R1	B3	Plate 1	HADHA_Intron5_1	HADHA	1	38	64	>4	1.6	2.6	P4HB	P4HB_Intron10_1	1	Plate1_r02c03f01p01-ch1sk1fk1fl1.tiff
B3_F1R1	B3	Plate 1	GANAB_Intron20_1	GANAB	1	32	64	>4	1.6	3.1	P4HB	P4HB_Intron10_1	1	Plate1_r02c03f01p01-ch1sk1fk1fl1.tiff
B3_F1R1	B3	Plate 1	ACBD7_Intron1_3	ACBD7	1	39	64	>4	1.6	2.6	P4HB	P4HB_Intron10_1	1	Plate1_r02c03f01p01-ch1sk1fk1fl1.tiff
B3_F1R1	B3	Plate 1	PARK7_Intron4_2	PARK7	1	139	64	>4	1.6	0.7	P4HB	P4HB_Intron10_1	1	Plate1_r02c03f01p01-ch1sk1fk1fl1.tiff
B3_F1R2	B3	Plate 4	KMT5A_Intron2_1	KMT5A	33	141	46	1	71.7	23.4	KMT5A	KMT5A_Intron2_1	1	Plate4_r02c03f01p01-ch1sk1fk1fl1.tiff
B3_F1R2	B3	Plate 4	GLYR1_Intron8_1	GLYR1	2	17	46	2	4.3	11.8	KMT5A	KMT5A_Intron2_1	1	Plate4_r02c03f01p01-ch1sk1fk1fl1.tiff
B3_F1R2	B3	Plate 4	PRDX6_Intron2_2	PRDX6	1	50	46	3	2.2	2	KMT5A	KMT5A_Intron2_1	1	Plate4_r02c03f01p01-ch1sk1fk1fl1.tiff
B3_F1R2	B3	Plate 4	UBE2N_Intron1_1	UBE2N	1	88	46	4	2.2	1.1	KMT5A	KMT5A_Intron2_1	1	Plate4_r02c03f01p01-ch1sk1fk1fl1.tiff
B3_F1R2	B3	Plate 4	NUDT21_Intron4_1	NUDT21	1	32	46	>4	2.2	3.1	KMT5A	KMT5A_Intron2_1	1	Plate4_r02c03f01p01-ch1sk1fk1fl1.tiff
B3_F1R2	B3	Plate 4	CYP7A1_Intron2_2	CYP7A1	1	82	46	>4	2.2	1.2	KMT5A	KMT5A_Intron2_1	1	Plate4_r02c03f01p01-ch1sk1fk1fl1.tiff
B3_F1R2	B3	Plate 4	GPD2_Intron2_1	GPD2	1	41	46	>4	2.2	2.4	KMT5A	KMT5A_Intron2_1	1	Plate4_r02c03f01p01-ch1sk1fk1fl1.tiff
B3_F1R2	B3	Plate 4	MAGT1_Intron6_1	MAGT1	1	57	46	>4	2.2	1.8	KMT5A	KMT5A_Intron2_1	1	Plate4_r02c03f01p01-ch1sk1fk1fl1.tiff
B3_F1R2	B3	Plate 4	BRPF3_Intron9_1	BRPF3	1	30	46	>4	2.2	3.3	KMT5A	KMT5A_Intron2_1	1	Plate4_r02c03f01p01-ch1sk1fk1fl1.tiff
B3_F1R2	B3	Plate 4	DLST_Intron13_1	DLST	1	33	46	>4	2.2	3	KMT5A	KMT5A_Intron2_1	1	Plate4_r02c03f01p01-ch1sk1fk1fl1.tiff
B3_F1R2	B3	Plate 4	CTR9_Intron1_1	CTR9	1	180	46	>4	2.2	0.6	KMT5A	KMT5A_Intron2_1	1	Plate4_r02c03f01p01-ch1sk1fk1fl1.tiff
B3_F1R2	B3	Plate 4	CAT_Intron1_1	CAT	1	102	46	>4	2.2	1	KMT5A	KMT5A_Intron2_1	1	Plate4_r02c03f01p01-ch1sk1fk1fl1.tiff
B3_F1R2	B3	Plate 4	HADHA_Intron14_1	HADHA	1	43	46	>4	2.2	2.3	KMT5A	KMT5A_Intron2_1	1	Plate4_r02c03f01p01-ch1sk1fk1fl1.tiff
B3_F1R3	B3	Plate 7	CTR9_Intron1_1	CTR9	34	180	41	1	82.9	18.9	CTR9	CTR9_Intron1_1	1	Plate7_r02c03f01p01-ch1sk1fk1fl1.tiff
B3_F1R3	B3	Plate 7	ALDH9A1_Intron6_1	ALDH9A1	1	101	41	2	2.4	1	CTR9	CTR9_Intron1_1	1	Plate7_r02c03f01p01-ch1sk1fk1fl1.tiff
B3_F1R3	B3	Plate 7	UCKL1_Intron3_1	UCKL1	1	26	41	3	2.4	3.8	CTR9	CTR9_Intron1_1	1	Plate7_r02c03f01p01-ch1sk1fk1fl1.tiff
B3_F1R3	B3	Plate 7	DNMT1_Intron3_1	DNMT1	1	8	41	4	2.4	12.5	CTR9	CTR9_Intron1_1	1	Plate7_r02c03f01p01-ch1sk1fk1fl1.tiff
B3_F1R3	B3	Plate 7	DDOST_Intron6_1	DDOST	1	9	41	>4	2.4	11.1	CTR9	CTR9_Intron1_1	1	Plate7_r02c03f01p01-ch1sk1fk1fl1.tiff
B3_F1R3	B3	Plate 7	ACOT7_Intron2_2	ACOT7	1	115	41	>4	2.4	0.9	CTR9	CTR9_Intron1_1	1	Plate7_r02c03f01p01-ch1sk1fk1fl1.tiff
B3_F1R3	B3	Plate 7	CTNNB1_Intron4_1	CTNNB1	1	70	41	>4	2.4	1.4	CTR9	CTR9_Intron1_1	1	Plate7_r02c03f01p01-ch1sk1fk1fl1.tiff
B3_F1R3	B3	Plate 7	MAN1B1_Intron1_1	MAN1B1	1	3	41	>4	2.4	33.3	CTR9	CTR9_Intron1_1	1	Plate7_r02c03f01p01-ch1sk1fk1fl1.tiff
B3_F2R1	B3	Plate 2	RPA1_Intron9_1	RPA1	8	16	12	1	66.7	50	RPA1	RPA1_Intron9_1	1	Plate2_r02c03f01p01-ch1sk1fk1fl1.tiff
B3_F2R1	B3	Plate 2	TADA3_Intron6_1	TADA3	1	44	12	2	8.3	2.3	RPA1	RPA1_Intron9_1	1	Plate2_r02c03f01p01-ch1sk1fk1fl1.tiff
B3_F2R1	B3	Plate 2	ACO2_Intron8_1	ACO2	1	11	12	3	8.3	9.1	RPA1	RPA1_Intron9_1	1	Plate2_r02c03f01p01-ch1sk1fk1fl1.tiff
B3_F2R1	B3	Plate 2	JMJD8_Intron8_1	JMJD8	1	43	12	4	8.3	2.3	RPA1	RPA1_Intron9_1	1	Plate2_r02c03f01p01-ch1sk1fk1fl1.tiff
B3_F2R1	B3	Plate 2	PRPS1_Intron2_2	PRPS1	1	139	12	>4	8.3	0.7	RPA1	RPA1_Intron9_1	1	Plate2_r02c03f01p01-ch1sk1fk1fl1.tiff
B3_F2R2	B3	Plate 5	NDUFB6_Intron2_2	NDUFB6	11	18	14	1	78.6	61.1	NDUFB6	NDUFB6_Intron2_2	1	Plate5_r02c03f01p01-ch1sk1fk1fl1.tiff
B3_F2R2	B3	Plate 5	PRDX6_Intron2_2	PRDX6	1	50	14	2	7.1	2	NDUFB6	NDUFB6_Intron2_2	1	Plate5_r02c03f01p01-ch1sk1fk1fl1.tiff
B3_F2R2	B3	Plate 5	GATAD2A_Intron7_1	GATAD2A	1	58	14	3	7.1	1.7	NDUFB6	NDUFB6_Intron2_2	1	Plate5_r02c03f01p01-ch1sk1fk1fl1.tiff
B3_F2R2	B3	Plate 5	COX8A_Intron1_1	COX8A	1	1	14	4	7.1	100	NDUFB6	NDUFB6_Intron2_2	1	Plate5_r02c03f01p01-ch1sk1fk1fl1.tiff
B3_F2R3	B3	Plate 8	GCSH_Intron2_3	GCSH	5	43	11	1	45.5	11.6				Plate8_r02c03f01p01-ch1sk1fk1fl1.tiff
B3_F2R3	B3	Plate 8	FH_Intron3_1	FH	3	100	11	2	27.3	3				Plate8_r02c03f01p01-ch1sk1fk1fl1.tiff
B3_F2R3	B3	Plate 8	COX7B_Intron3_1	COX7B	1	2	11	3	9.1	50				Plate8_r02c03f01p01-ch1sk1fk1fl1.tiff
B3_F2R3	B3	Plate 8	ERI1_Intron1_1	ERI1	1	63	11	4	9.1	1.6				Plate8_r02c03f01p01-ch1sk1fk1fl1.tiff
B3_F2R3	B3	Plate 8	TAF9B_Intron1_2	TAF9B	1	87	11	>4	9.1	1.1				Plate8_r02c03f01p01-ch1sk1fk1fl1.tiff
B3_F3R1	B3	Plate 3	HCFC1_Intron18_1	HCFC1	31	37	37	1	83.8	83.8	HCFC1	HCFC1_Intron18_1	1	Plate3_r02c03f01p01-ch1sk1fk1fl1.tiff
B3_F3R1	B3	Plate 3	SYNJ2_Intron10_1	SYNJ2	2	18	37	2	5.4	11.1	HCFC1	HCFC1_Intron18_1	1	Plate3_r02c03f01p01-ch1sk1fk1fl1.tiff
B3_F3R1	B3	Plate 3	MORF4L1_Intron9_1	MORF4L1	1	39	37	3	2.7	2.6	HCFC1	HCFC1_Intron18_1	1	Plate3_r02c03f01p01-ch1sk1fk1fl1.tiff
B3_F3R1	B3	Plate 3	USP3_Intron5_1	USP3	1	27	37	4	2.7	3.7	HCFC1	HCFC1_Intron18_1	1	Plate3_r02c03f01p01-ch1sk1fk1fl1.tiff
B3_F3R1	B3	Plate 3	KARS_Intron6_1	KARS	1	30	37	>4	2.7	3.3	HCFC1	HCFC1_Intron18_1	1	Plate3_r02c03f01p01-ch1sk1fk1fl1.tiff
B3_F3R1	B3	Plate 3	KMT5A_Intron2_1	KMT5A	1	141	37	>4	2.7	0.7	HCFC1	HCFC1_Intron18_1	1	Plate3_r02c03f01p01-ch1sk1fk1fl1.tiff
B3_F3R2	B3	Plate 6	FMR1_Intron8_1	FMR1	34	70	39	1	87.2	48.6	FMR1	FMR1_Intron8_1	1	Plate6_r02c03f01p01-ch1sk1fk1fl1.tiff
B3_F3R2	B3	Plate 6	CYP7A1_Intron2_2	CYP7A1	1	82	39	2	2.6	1.2	FMR1	FMR1_Intron8_1	1	Plate6_r02c03f01p01-ch1sk1fk1fl1.tiff
B3_F3R2	B3	Plate 6	SUPT6H_Intron19_1	SUPT6H	1	8	39	3	2.6	12.5	FMR1	FMR1_Intron8_1	1	Plate6_r02c03f01p01-ch1sk1fk1fl1.tiff
B3_F3R2	B3	Plate 6	PRPS1_Intron2_2	PRPS1	1	139	39	4	2.6	0.7	FMR1	FMR1_Intron8_1	1	Plate6_r02c03f01p01-ch1sk1fk1fl1.tiff
B3_F3R2	B3	Plate 6	NDUFA8_Intron1_2	NDUFA8	1	39	39	>4	2.6	2.6	FMR1	FMR1_Intron8_1	1	Plate6_r02c03f01p01-ch1sk1fk1fl1.tiff
B3_F3R2	B3	Plate 6	PYGL_Intron4_1	PYGL	1	121	39	>4	2.6	0.8	FMR1	FMR1_Intron8_1	1	Plate6_r02c03f01p01-ch1sk1fk1fl1.tiff
B3_F3R3	B3	Plate 9	ALDH9A1_Intron6_1	ALDH9A1	1	101	3	1	33.3	1
B3_F3R3	B3	Plate 9	ECH1_Intron9_1	ECH1	1	35	3	2	33.3	2.9
B3_F3R3	B3	Plate 9	SYNJ2_Intron10_1	SYNJ2	1	18	3	3	33.3	5.6
B4_F1R1	B4	Plate 1	ACLY_Intron7_1	ACLY	50	68	62	1	80.6	73.5	ACLY	ACLY_Intron7_1	1	Plate1_r02c04f01p01-ch1sk1fk1fl1.tiff
B4_F1R1	B4	Plate 1	BRD8_Intron13_1	BRD8	3	22	62	2	4.8	13.6	ACLY	ACLY_Intron7_1	1	Plate1_r02c04f01p01-ch1sk1fk1fl1.tiff
B4_F1R1	B4	Plate 1	SNW1_Intron12_1	SNW1	2	67	62	3	3.2	3	ACLY	ACLY_Intron7_1	1	Plate1_r02c04f01p01-ch1sk1fk1fl1.tiff
B4_F1R1	B4	Plate 1	NDUFV2_Intron1_1	NDUFV2	1	49	62	4	1.6	2	ACLY	ACLY_Intron7_1	1	Plate1_r02c04f01p01-ch1sk1fk1fl1.tiff
B4_F1R1	B4	Plate 1	SET_Intron6_1	SET	1	39	62	>4	1.6	2.6	ACLY	ACLY_Intron7_1	1	Plate1_r02c04f01p01-ch1sk1fk1fl1.tiff
B4_F1R1	B4	Plate 1	MOV10L1_Intron25_1	MOV10L1	1	61	62	>4	1.6	1.6	ACLY	ACLY_Intron7_1	1	Plate1_r02c04f01p01-ch1sk1fk1fl1.tiff
B4_F1R1	B4	Plate 1	HCFC1_Intron18_1	HCFC1	1	37	62	>4	1.6	2.7	ACLY	ACLY_Intron7_1	1	Plate1_r02c04f01p01-ch1sk1fk1fl1.tiff
B4_F1R1	B4	Plate 1	CTR9_Intron1_1	CTR9	1	180	62	>4	1.6	0.6	ACLY	ACLY_Intron7_1	1	Plate1_r02c04f01p01-ch1sk1fk1fl1.tiff
B4_F1R1	B4	Plate 1	SNCA_Intron4_1	SNCA	1	25	62	>4	1.6	4	ACLY	ACLY_Intron7_1	1	Plate1_r02c04f01p01-ch1sk1fk1fl1.tiff
B4_F1R1	B4	Plate 1	SOD1_Intron4_2	SOD1	1	58	62	>4	1.6	1.7	ACLY	ACLY_Intron7_1	1	Plate1_r02c04f01p01-ch1sk1fk1fl1.tiff
B4_F1R2	B4	Plate 4	SNW1_Intron12_1	SNW1	30	67	44	1	68.2	44.8	SNW1	SNW1_Intron12_1	1	Plate4_r02c04f01p01-ch1sk1fk1fl1.tiff
B4_F1R2	B4	Plate 4	UBE2N_Intron1_1	UBE2N	3	88	44	2	6.8	3.4	SNW1	SNW1_Intron12_1	1	Plate4_r02c04f01p01-ch1sk1fk1fl1.tiff
B4_F1R2	B4	Plate 4	FMR1_Intron8_1	FMR1	3	70	44	3	6.8	4.3	SNW1	SNW1_Intron12_1	1	Plate4_r02c04f01p01-ch1sk1fk1fl1.tiff
B4_F1R2	B4	Plate 4	JADE3_Intron3_3	JADE3	1	31	44	4	2.3	3.2	SNW1	SNW1_Intron12_1	1	Plate4_r02c04f01p01-ch1sk1fk1fl1.tiff
B4_F1R2	B4	Plate 4	GLYR1_Intron8_1	GLYR1	1	17	44	>4	2.3	5.9	SNW1	SNW1_Intron12_1	1	Plate4_r02c04f01p01-ch1sk1fk1fl1.tiff
B4_F1R2	B4	Plate 4	PPA1_Intron3_1	PPA1	1	27	44	>4	2.3	3.7	SNW1	SNW1_Intron12_1	1	Plate4_r02c04f01p01-ch1sk1fk1fl1.tiff
B4_F1R2	B4	Plate 4	PLCE1_Intron28_1	PLCE1	1	44	44	>4	2.3	2.3	SNW1	SNW1_Intron12_1	1	Plate4_r02c04f01p01-ch1sk1fk1fl1.tiff
B4_F1R2	B4	Plate 4	SEPHS1_Intron6_1	SEPHS1	1	84	44	>4	2.3	1.2	SNW1	SNW1_Intron12_1	1	Plate4_r02c04f01p01-ch1sk1fk1fl1.tiff
B4_F1R2	B4	Plate 4	ACLY_Intron7_1	ACLY	1	68	44	>4	2.3	1.5	SNW1	SNW1_Intron12_1	1	Plate4_r02c04f01p01-ch1sk1fk1fl1.tiff
B4_F1R2	B4	Plate 4	GAPDH_Intron3_2	GAPDH	1	71	44	>4	2.3	1.4	SNW1	SNW1_Intron12_1	1	Plate4_r02c04f01p01-ch1sk1fk1fl1.tiff
B4_F1R2	B4	Plate 4	GLA_Intron6_1	GLA	1	18	44	>4	2.3	5.6	SNW1	SNW1_Intron12_1	1	Plate4_r02c04f01p01-ch1sk1fk1fl1.tiff
B4_F1R3	B4	Plate 7	ALDH9A1_Intron6_1	ALDH9A1	15	101	16	1	93.8	14.9	ALDH9A1	ALDH9A1_Intron6_1	1	Plate7_r02c04f01p01-ch1sk1fk1fl1.tiff
B4_F1R3	B4	Plate 7	CTR9_Intron1_1	CTR9	1	180	16	2	6.3	0.6	ALDH9A1	ALDH9A1_Intron6_1	1	Plate7_r02c04f01p01-ch1sk1fk1fl1.tiff
B4_F2R1	B4	Plate 2	USP3_Intron5_1	USP3	21	27	53	1	39.6	77.8	USP3;LRRK2	USP3_Intron5_1;LRRK2_Intron46_1	2	Plate2_r02c04f01p01-ch1sk1fk1fl1.tiff
B4_F2R1	B4	Plate 2	LRRK2_Intron46_1	LRRK2	19	24	53	2	35.8	79.2	USP3;LRRK2	USP3_Intron5_1;LRRK2_Intron46_1	2	Plate2_r02c04f01p01-ch1sk1fk1fl1.tiff
B4_F2R1	B4	Plate 2	MOV10L1_Intron25_1	MOV10L1	3	61	53	3	5.7	4.9	USP3;LRRK2	USP3_Intron5_1;LRRK2_Intron46_1	2	Plate2_r02c04f01p01-ch1sk1fk1fl1.tiff
B4_F2R1	B4	Plate 2	CARS2_Intron13_1	CARS2	1	19	53	4	1.9	5.3	USP3;LRRK2	USP3_Intron5_1;LRRK2_Intron46_1	2	Plate2_r02c04f01p01-ch1sk1fk1fl1.tiff
B4_F2R1	B4	Plate 2	DPYSL2_Intron7_1	DPYSL2	1	116	53	>4	1.9	0.9	USP3;LRRK2	USP3_Intron5_1;LRRK2_Intron46_1	2	Plate2_r02c04f01p01-ch1sk1fk1fl1.tiff
B4_F2R1	B4	Plate 2	COX7A2_Intron2_2	COX7A2	1	28	53	>4	1.9	3.6	USP3;LRRK2	USP3_Intron5_1;LRRK2_Intron46_1	2	Plate2_r02c04f01p01-ch1sk1fk1fl1.tiff
B4_F2R1	B4	Plate 2	HMGA2_Intron1_1	HMGA2	1	93	53	>4	1.9	1.1	USP3;LRRK2	USP3_Intron5_1;LRRK2_Intron46_1	2	Plate2_r02c04f01p01-ch1sk1fk1fl1.tiff
B4_F2R1	B4	Plate 2	TARS_Intron8_1	TARS	1	18	53	>4	1.9	5.6	USP3;LRRK2	USP3_Intron5_1;LRRK2_Intron46_1	2	Plate2_r02c04f01p01-ch1sk1fk1fl1.tiff
B4_F2R1	B4	Plate 2	ACLY_Intron22_1	ACLY	1	140	53	>4	1.9	0.7	USP3;LRRK2	USP3_Intron5_1;LRRK2_Intron46_1	2	Plate2_r02c04f01p01-ch1sk1fk1fl1.tiff
B4_F2R1	B4	Plate 2	EP300_Intron3_1	EP300	1	22	53	>4	1.9	4.5	USP3;LRRK2	USP3_Intron5_1;LRRK2_Intron46_1	2	Plate2_r02c04f01p01-ch1sk1fk1fl1.tiff
B4_F2R1	B4	Plate 2	PUS1_Intron2_2	PUS1	1	23	53	>4	1.9	4.3	USP3;LRRK2	USP3_Intron5_1;LRRK2_Intron46_1	2	Plate2_r02c04f01p01-ch1sk1fk1fl1.tiff
B4_F2R1	B4	Plate 2	CS_Intron10_1	CS	1	66	53	>4	1.9	1.5	USP3;LRRK2	USP3_Intron5_1;LRRK2_Intron46_1	2	Plate2_r02c04f01p01-ch1sk1fk1fl1.tiff
B4_F2R1	B4	Plate 2	ITPA_Intron1_2	ITPA	1	31	53	>4	1.9	3.2	USP3;LRRK2	USP3_Intron5_1;LRRK2_Intron46_1	2	Plate2_r02c04f01p01-ch1sk1fk1fl1.tiff
B4_F2R2	B4	Plate 5	HADHA_Intron14_1	HADHA	21	43	32	1	65.6	48.8	HADHA	HADHA_Intron14_1	1	Plate5_r02c04f01p01-ch1sk1fk1fl1.tiff
B4_F2R2	B4	Plate 5	PRDX6_Intron2_2	PRDX6	1	50	32	2	3.1	2	HADHA	HADHA_Intron14_1	1	Plate5_r02c04f01p01-ch1sk1fk1fl1.tiff
B4_F2R2	B4	Plate 5	UNG_Intron1_1	UNG	1	8	32	3	3.1	12.5	HADHA	HADHA_Intron14_1	1	Plate5_r02c04f01p01-ch1sk1fk1fl1.tiff
B4_F2R2	B4	Plate 5	DPYSL5_Intron6_1	DPYSL5	1	18	32	4	3.1	5.6	HADHA	HADHA_Intron14_1	1	Plate5_r02c04f01p01-ch1sk1fk1fl1.tiff
B4_F2R2	B4	Plate 5	UBE2N_Intron1_1	UBE2N	1	88	32	>4	3.1	1.1	HADHA	HADHA_Intron14_1	1	Plate5_r02c04f01p01-ch1sk1fk1fl1.tiff
B4_F2R2	B4	Plate 5	BAZ1B_Intron17_1	BAZ1B	1	32	32	>4	3.1	3.1	HADHA	HADHA_Intron14_1	1	Plate5_r02c04f01p01-ch1sk1fk1fl1.tiff
B4_F2R2	B4	Plate 5	MEAF6_Intron3_2	MEAF6	1	19	32	>4	3.1	5.3	HADHA	HADHA_Intron14_1	1	Plate5_r02c04f01p01-ch1sk1fk1fl1.tiff
B4_F2R2	B4	Plate 5	NDUFS3_Intron6_1	NDUFS3	1	15	32	>4	3.1	6.7	HADHA	HADHA_Intron14_1	1	Plate5_r02c04f01p01-ch1sk1fk1fl1.tiff
B4_F2R2	B4	Plate 5	ALDH1A2_Intron6_1	ALDH1A2	1	8	32	>4	3.1	12.5	HADHA	HADHA_Intron14_1	1	Plate5_r02c04f01p01-ch1sk1fk1fl1.tiff
B4_F2R2	B4	Plate 5	FASN_Intron22_1	FASN	1	55	32	>4	3.1	1.8	HADHA	HADHA_Intron14_1	1	Plate5_r02c04f01p01-ch1sk1fk1fl1.tiff
B4_F2R2	B4	Plate 5	OAT_Intron6_1	OAT	1	121	32	>4	3.1	0.8	HADHA	HADHA_Intron14_1	1	Plate5_r02c04f01p01-ch1sk1fk1fl1.tiff
B4_F2R2	B4	Plate 5	ACLY_Intron22_1	ACLY	1	140	32	>4	3.1	0.7	HADHA	HADHA_Intron14_1	1	Plate5_r02c04f01p01-ch1sk1fk1fl1.tiff
B4_F2R3	B4	Plate 8	ATIC_Intron11_1	ATIC	8	10	18	1	44.4	80				Plate8_r02c04f01p01-ch1sk1fk1fl1.tiff
B4_F2R3	B4	Plate 8	ACLY_Intron16_1	ACLY	6	25	18	2	33.3	24				Plate8_r02c04f01p01-ch1sk1fk1fl1.tiff
B4_F2R3	B4	Plate 8	ALDH1A2_Intron6_1	ALDH1A2	4	8	18	3	22.2	50				Plate8_r02c04f01p01-ch1sk1fk1fl1.tiff
B4_F3R1	B4	Plate 3	SDHA_Intron9_1	SDHA	20	31	30	1	66.7	64.5	SDHA	SDHA_Intron9_1	1	Plate3_r02c04f01p01-ch1sk1fk1fl1.tiff
B4_F3R1	B4	Plate 3	RPA1_Intron9_1	RPA1	1	16	30	2	3.3	6.3	SDHA	SDHA_Intron9_1	1	Plate3_r02c04f01p01-ch1sk1fk1fl1.tiff
B4_F3R1	B4	Plate 3	OTC_Intron7_1	OTC	1	19	30	3	3.3	5.3	SDHA	SDHA_Intron9_1	1	Plate3_r02c04f01p01-ch1sk1fk1fl1.tiff
B4_F3R1	B4	Plate 3	BLVRA_Intron2_1	BLVRA	1	24	30	4	3.3	4.2	SDHA	SDHA_Intron9_1	1	Plate3_r02c04f01p01-ch1sk1fk1fl1.tiff
B4_F3R1	B4	Plate 3	HSD17B10_Intron4_1	HSD17B10	1	73	30	>4	3.3	1.4	SDHA	SDHA_Intron9_1	1	Plate3_r02c04f01p01-ch1sk1fk1fl1.tiff
B4_F3R1	B4	Plate 3	CYC1_Intron1_1	CYC1	1	71	30	>4	3.3	1.4	SDHA	SDHA_Intron9_1	1	Plate3_r02c04f01p01-ch1sk1fk1fl1.tiff
B4_F3R1	B4	Plate 3	SNCA_Intron4_1	SNCA	1	25	30	>4	3.3	4	SDHA	SDHA_Intron9_1	1	Plate3_r02c04f01p01-ch1sk1fk1fl1.tiff
B4_F3R1	B4	Plate 3	OXA1L_Intron1_1	OXA1L	1	74	30	>4	3.3	1.4	SDHA	SDHA_Intron9_1	1	Plate3_r02c04f01p01-ch1sk1fk1fl1.tiff
B4_F3R1	B4	Plate 3	PHF10_Intron6_1	PHF10	1	35	30	>4	3.3	2.9	SDHA	SDHA_Intron9_1	1	Plate3_r02c04f01p01-ch1sk1fk1fl1.tiff
B4_F3R1	B4	Plate 3	TARS_Intron1_1	TARS	1	86	30	>4	3.3	1.2	SDHA	SDHA_Intron9_1	1	Plate3_r02c04f01p01-ch1sk1fk1fl1.tiff
B4_F3R1	B4	Plate 3	RRM1_Intron17_1	RRM1	1	60	30	>4	3.3	1.7	SDHA	SDHA_Intron9_1	1	Plate3_r02c04f01p01-ch1sk1fk1fl1.tiff
B4_F3R2	B4	Plate 6	UGT1A10_Intron1_1	UGT1A10	5	10	13	1	38.5	50				Plate6_r02c04f01p01-ch1sk1fk1fl1.tiff
B4_F3R2	B4	Plate 6	DHRS2_Intron3_1	DHRS2	3	7	13	2	23.1	42.9				Plate6_r02c04f01p01-ch1sk1fk1fl1.tiff
B4_F3R2	B4	Plate 6	PRDX6_Intron2_2	PRDX6	1	50	13	3	7.7	2				Plate6_r02c04f01p01-ch1sk1fk1fl1.tiff
B4_F3R2	B4	Plate 6	SET_Intron7_1	SET	1	29	13	4	7.7	3.4				Plate6_r02c04f01p01-ch1sk1fk1fl1.tiff
B4_F3R2	B4	Plate 6	SDHA_Intron9_1	SDHA	1	31	13	>4	7.7	3.2				Plate6_r02c04f01p01-ch1sk1fk1fl1.tiff
B4_F3R2	B4	Plate 6	PARK7_Intron3_2	PARK7	1	14	13	>4	7.7	7.1				Plate6_r02c04f01p01-ch1sk1fk1fl1.tiff
B4_F3R2	B4	Plate 6	STAT5A_Intron14_1	STAT5A	1	25	13	>4	7.7	4				Plate6_r02c04f01p01-ch1sk1fk1fl1.tiff
B4_F3R3	B4	Plate 9	CTR9_Intron1_1	CTR9	1	180	1	1	100	0.6
B5_F1R1	B5	Plate 1	NDUFV2_Intron1_1	NDUFV2	31	49	41	1	75.6	63.3	NDUFV2	NDUFV2_Intron1_1	1	Plate1_r02c05f01p01-ch1sk1fk1fl1.tiff
B5_F1R1	B5	Plate 1	P4HB_Intron6_1	P4HB	2	103	41	2	4.9	1.9	NDUFV2	NDUFV2_Intron1_1	1	Plate1_r02c05f01p01-ch1sk1fk1fl1.tiff
B5_F1R1	B5	Plate 1	ALG3_Intron3_2	ALG3	1	15	41	3	2.4	6.7	NDUFV2	NDUFV2_Intron1_1	1	Plate1_r02c05f01p01-ch1sk1fk1fl1.tiff
B5_F1R1	B5	Plate 1	NDUFAF8_Intron1_1	NDUFAF8	1	26	41	4	2.4	3.8	NDUFV2	NDUFV2_Intron1_1	1	Plate1_r02c05f01p01-ch1sk1fk1fl1.tiff
B5_F1R1	B5	Plate 1	NSUN2_Intron1_1	NSUN2	1	20	41	>4	2.4	5	NDUFV2	NDUFV2_Intron1_1	1	Plate1_r02c05f01p01-ch1sk1fk1fl1.tiff
B5_F1R1	B5	Plate 1	HMGA2_Intron1_1	HMGA2	1	93	41	>4	2.4	1.1	NDUFV2	NDUFV2_Intron1_1	1	Plate1_r02c05f01p01-ch1sk1fk1fl1.tiff
B5_F1R1	B5	Plate 1	BRD8_Intron13_1	BRD8	1	22	41	>4	2.4	4.5	NDUFV2	NDUFV2_Intron1_1	1	Plate1_r02c05f01p01-ch1sk1fk1fl1.tiff
B5_F1R1	B5	Plate 1	HSD17B10_Intron4_1	HSD17B10	1	73	41	>4	2.4	1.4	NDUFV2	NDUFV2_Intron1_1	1	Plate1_r02c05f01p01-ch1sk1fk1fl1.tiff
B5_F1R1	B5	Plate 1	FASN_Intron22_1	FASN	1	55	41	>4	2.4	1.8	NDUFV2	NDUFV2_Intron1_1	1	Plate1_r02c05f01p01-ch1sk1fk1fl1.tiff
B5_F1R1	B5	Plate 1	CUL4B_Intron20_1	CUL4B	1	94	41	>4	2.4	1.1	NDUFV2	NDUFV2_Intron1_1	1	Plate1_r02c05f01p01-ch1sk1fk1fl1.tiff
B5_F1R2	B5	Plate 4	PRDX6_Intron2_2	PRDX6	37	50	50	1	74	74	PRDX6	PRDX6_Intron2_2	1	Plate4_r02c05f01p01-ch1sk1fk1fl1.tiff
B5_F1R2	B5	Plate 4	LPGAT1_Intron4_1	LPGAT1	2	21	50	2	4	9.5	PRDX6	PRDX6_Intron2_2	1	Plate4_r02c05f01p01-ch1sk1fk1fl1.tiff
B5_F1R2	B5	Plate 4	GMPS_Intron7_1	GMPS	1	51	50	3	2	2	PRDX6	PRDX6_Intron2_2	1	Plate4_r02c05f01p01-ch1sk1fk1fl1.tiff
B5_F1R2	B5	Plate 4	TARS_Intron9_1	TARS	1	22	50	4	2	4.5	PRDX6	PRDX6_Intron2_2	1	Plate4_r02c05f01p01-ch1sk1fk1fl1.tiff
B5_F1R2	B5	Plate 4	NUDT5_Intron2_2	NUDT5	1	9	50	>4	2	11.1	PRDX6	PRDX6_Intron2_2	1	Plate4_r02c05f01p01-ch1sk1fk1fl1.tiff
B5_F1R2	B5	Plate 4	CAD_Intron23_1	CAD	1	15	50	>4	2	6.7	PRDX6	PRDX6_Intron2_2	1	Plate4_r02c05f01p01-ch1sk1fk1fl1.tiff
B5_F1R2	B5	Plate 4	ECH1_Intron9_1	ECH1	1	35	50	>4	2	2.9	PRDX6	PRDX6_Intron2_2	1	Plate4_r02c05f01p01-ch1sk1fk1fl1.tiff
B5_F1R2	B5	Plate 4	KMT5A_Intron2_1	KMT5A	1	141	50	>4	2	0.7	PRDX6	PRDX6_Intron2_2	1	Plate4_r02c05f01p01-ch1sk1fk1fl1.tiff
B5_F1R2	B5	Plate 4	P4HB_Intron6_1	P4HB	1	103	50	>4	2	1	PRDX6	PRDX6_Intron2_2	1	Plate4_r02c05f01p01-ch1sk1fk1fl1.tiff
B5_F1R2	B5	Plate 4	OAT_Intron6_1	OAT	1	121	50	>4	2	0.8	PRDX6	PRDX6_Intron2_2	1	Plate4_r02c05f01p01-ch1sk1fk1fl1.tiff
B5_F1R2	B5	Plate 4	ACLY_Intron22_1	ACLY	1	140	50	>4	2	0.7	PRDX6	PRDX6_Intron2_2	1	Plate4_r02c05f01p01-ch1sk1fk1fl1.tiff
B5_F1R2	B5	Plate 4	FH_Intron3_1	FH	1	100	50	>4	2	1	PRDX6	PRDX6_Intron2_2	1	Plate4_r02c05f01p01-ch1sk1fk1fl1.tiff
B5_F1R2	B5	Plate 4	PARK7_Intron4_2	PARK7	1	139	50	>4	2	0.7	PRDX6	PRDX6_Intron2_2	1	Plate4_r02c05f01p01-ch1sk1fk1fl1.tiff
B5_F1R3	B5	Plate 7	DDB1_Intron18_1	DDB1	12	27	29	1	41.4	44.4	DDB1	DDB1_Intron18_1	1	Plate7_r02c05f01p01-ch1sk1fk1fl1.tiff
B5_F1R3	B5	Plate 7	PFKM_Intron10_1	PFKM	9	18	29	2	31	50	DDB1	DDB1_Intron18_1	1	Plate7_r02c05f01p01-ch1sk1fk1fl1.tiff
B5_F1R3	B5	Plate 7	TNFRSF1A_Intron1_2	TNFRSF1A	4	16	29	3	13.8	25	DDB1	DDB1_Intron18_1	1	Plate7_r02c05f01p01-ch1sk1fk1fl1.tiff
B5_F1R3	B5	Plate 7	FUBP3_Intron7_1	FUBP3	1	15	29	4	3.4	6.7	DDB1	DDB1_Intron18_1	1	Plate7_r02c05f01p01-ch1sk1fk1fl1.tiff
B5_F1R3	B5	Plate 7	PNPT1_Intron3_1	PNPT1	1	24	29	>4	3.4	4.2	DDB1	DDB1_Intron18_1	1	Plate7_r02c05f01p01-ch1sk1fk1fl1.tiff
B5_F1R3	B5	Plate 7	VPS4A_Intron9_1	VPS4A	1	17	29	>4	3.4	5.9	DDB1	DDB1_Intron18_1	1	Plate7_r02c05f01p01-ch1sk1fk1fl1.tiff
B5_F1R3	B5	Plate 7	MTHFD1_Intron26_2	MTHFD1	1	38	29	>4	3.4	2.6	DDB1	DDB1_Intron18_1	1	Plate7_r02c05f01p01-ch1sk1fk1fl1.tiff
B5_F2R1	B5	Plate 2	MOV10L1_Intron25_1	MOV10L1	49	61	58	1	84.5	80.3	MOV10L1	MOV10L1_Intron25_1	1	Plate2_r02c05f01p01-ch1sk1fk1fl1.tiff
B5_F2R1	B5	Plate 2	MUTYH_Intron13_1	MUTYH	1	22	58	2	1.7	4.5	MOV10L1	MOV10L1_Intron25_1	1	Plate2_r02c05f01p01-ch1sk1fk1fl1.tiff
B5_F2R1	B5	Plate 2	FUBP3_Intron7_1	FUBP3	1	15	58	3	1.7	6.7	MOV10L1	MOV10L1_Intron25_1	1	Plate2_r02c05f01p01-ch1sk1fk1fl1.tiff
B5_F2R1	B5	Plate 2	PCCA_Intron5_1	PCCA	1	25	58	4	1.7	4	MOV10L1	MOV10L1_Intron25_1	1	Plate2_r02c05f01p01-ch1sk1fk1fl1.tiff
B5_F2R1	B5	Plate 2	NUDT3_Intron1_2	NUDT3	1	29	58	>4	1.7	3.4	MOV10L1	MOV10L1_Intron25_1	1	Plate2_r02c05f01p01-ch1sk1fk1fl1.tiff
B5_F2R1	B5	Plate 2	HCFC1_Intron18_1	HCFC1	1	37	58	>4	1.7	2.7	MOV10L1	MOV10L1_Intron25_1	1	Plate2_r02c05f01p01-ch1sk1fk1fl1.tiff
B5_F2R1	B5	Plate 2	PRPS1_Intron2_2	PRPS1	1	139	58	>4	1.7	0.7	MOV10L1	MOV10L1_Intron25_1	1	Plate2_r02c05f01p01-ch1sk1fk1fl1.tiff
B5_F2R1	B5	Plate 2	SNCA_Intron4_1	SNCA	1	25	58	>4	1.7	4	MOV10L1	MOV10L1_Intron25_1	1	Plate2_r02c05f01p01-ch1sk1fk1fl1.tiff
B5_F2R1	B5	Plate 2	GFPT1_Intron19_1	GFPT1	1	85	58	>4	1.7	1.2	MOV10L1	MOV10L1_Intron25_1	1	Plate2_r02c05f01p01-ch1sk1fk1fl1.tiff
B5_F2R1	B5	Plate 2	IDE_Intron13_1	IDE	1	94	58	>4	1.7	1.1	MOV10L1	MOV10L1_Intron25_1	1	Plate2_r02c05f01p01-ch1sk1fk1fl1.tiff
B5_F2R2	B5	Plate 5	NDUFA1_Intron1_2	NDUFA1	2	42	20	1	10	4.8				Plate5_r02c05f01p01-ch1sk1fk1fl1.tiff
B5_F2R2	B5	Plate 5	GANAB_Intron20_1	GANAB	2	32	20	2	10	6.3				Plate5_r02c05f01p01-ch1sk1fk1fl1.tiff
B5_F2R2	B5	Plate 5	TRMT6_Intron7_1	TRMT6	2	23	20	3	10	8.7				Plate5_r02c05f01p01-ch1sk1fk1fl1.tiff
B5_F2R2	B5	Plate 5	FN3K_Intron4_2	FN3K	1	50	20	4	5	2				Plate5_r02c05f01p01-ch1sk1fk1fl1.tiff
B5_F2R2	B5	Plate 5	TARS_Intron9_1	TARS	1	22	20	>4	5	4.5				Plate5_r02c05f01p01-ch1sk1fk1fl1.tiff
B5_F2R2	B5	Plate 5	SV2B_Intron5_1	SV2B	1	30	20	>4	5	3.3				Plate5_r02c05f01p01-ch1sk1fk1fl1.tiff
B5_F2R2	B5	Plate 5	DDB1_Intron18_1	DDB1	1	27	20	>4	5	3.7				Plate5_r02c05f01p01-ch1sk1fk1fl1.tiff
B5_F2R2	B5	Plate 5	GM2A_Intron3_2	GM2A	1	12	20	>4	5	8.3				Plate5_r02c05f01p01-ch1sk1fk1fl1.tiff
B5_F2R2	B5	Plate 5	NDUFA8_Intron1_2	NDUFA8	1	39	20	>4	5	2.6				Plate5_r02c05f01p01-ch1sk1fk1fl1.tiff
B5_F2R2	B5	Plate 5	ECH1_Intron9_1	ECH1	1	35	20	>4	5	2.9				Plate5_r02c05f01p01-ch1sk1fk1fl1.tiff
B5_F2R2	B5	Plate 5	CYP7A1_Intron2_2	CYP7A1	1	82	20	>4	5	1.2				Plate5_r02c05f01p01-ch1sk1fk1fl1.tiff
B5_F2R2	B5	Plate 5	MEAF6_Intron1_1	MEAF6	1	49	20	>4	5	2				Plate5_r02c05f01p01-ch1sk1fk1fl1.tiff
B5_F2R2	B5	Plate 5	PPOX_Intron2_1	PPOX	1	50	20	>4	5	2				Plate5_r02c05f01p01-ch1sk1fk1fl1.tiff
B5_F2R2	B5	Plate 5	DOT1L_Intron4_1	DOT1L	1	85	20	>4	5	1.2				Plate5_r02c05f01p01-ch1sk1fk1fl1.tiff
B5_F2R2	B5	Plate 5	CAD_Intron25_1	CAD	1	58	20	>4	5	1.7				Plate5_r02c05f01p01-ch1sk1fk1fl1.tiff
B5_F2R2	B5	Plate 5	GCKR_Intron15_1	GCKR	1	27	20	>4	5	3.7				Plate5_r02c05f01p01-ch1sk1fk1fl1.tiff
B5_F2R2	B5	Plate 5	GFPT1_Intron13_1	GFPT1	1	29	20	>4	5	3.4				Plate5_r02c05f01p01-ch1sk1fk1fl1.tiff
B5_F2R3	B5	Plate 8	DNMT1_Intron3_1	DNMT1	5	8	11	1	45.5	62.5				Plate8_r02c05f01p01-ch1sk1fk1fl1.tiff
B5_F2R3	B5	Plate 8	FUBP3_Intron7_1	FUBP3	4	15	11	2	36.4	26.7				Plate8_r02c05f01p01-ch1sk1fk1fl1.tiff
B5_F2R3	B5	Plate 8	ERI1_Intron1_1	ERI1	1	63	11	3	9.1	1.6				Plate8_r02c05f01p01-ch1sk1fk1fl1.tiff
B5_F2R3	B5	Plate 8	ACOT7_Intron2_2	ACOT7	1	115	11	4	9.1	0.9				Plate8_r02c05f01p01-ch1sk1fk1fl1.tiff
B5_F3R1	B5	Plate 3	NSUN2_Intron1_1	NSUN2	14	20	15	1	93.3	70	NSUN2	NSUN2_Intron1_1	1	Plate3_r02c05f01p01-ch1sk1fk1fl1.tiff
B5_F3R1	B5	Plate 3	FH_Intron8_1	FH	1	29	15	2	6.7	3.4	NSUN2	NSUN2_Intron1_1	1	Plate3_r02c05f01p01-ch1sk1fk1fl1.tiff
B5_F3R2	B5	Plate 6	NUDT5_Intron2_2	NUDT5	6	9	11	1	54.5	66.7	NUDT5	NUDT5_Intron2_2	1	Plate6_r02c05f01p01-ch1sk1fk1fl1.tiff
B5_F3R2	B5	Plate 6	ACLY_Intron10_1	ACLY	1	56	11	2	9.1	1.8	NUDT5	NUDT5_Intron2_2	1	Plate6_r02c05f01p01-ch1sk1fk1fl1.tiff
B5_F3R2	B5	Plate 6	FMO3_Intron2_2	FMO3	1	20	11	3	9.1	5	NUDT5	NUDT5_Intron2_2	1	Plate6_r02c05f01p01-ch1sk1fk1fl1.tiff
B5_F3R2	B5	Plate 6	PYGO2_Intron2_2	PYGO2	1	87	11	4	9.1	1.1	NUDT5	NUDT5_Intron2_2	1	Plate6_r02c05f01p01-ch1sk1fk1fl1.tiff
B5_F3R2	B5	Plate 6	ACBD7_Intron1_3	ACBD7	1	39	11	>4	9.1	2.6	NUDT5	NUDT5_Intron2_2	1	Plate6_r02c05f01p01-ch1sk1fk1fl1.tiff
B5_F3R2	B5	Plate 6	HADHA_Intron14_1	HADHA	1	43	11	>4	9.1	2.3	NUDT5	NUDT5_Intron2_2	1	Plate6_r02c05f01p01-ch1sk1fk1fl1.tiff
B5_F3R3	B5	Plate 9	CTR9_Intron1_1	CTR9	1	180	1	1	100	0.6
B6_F1R1	B6	Plate 1	HMGA2_Intron1_1	HMGA2	5	93	19	1	26.3	5.4				Plate1_r02c06f01p01-ch1sk1fk1fl1.tiff
B6_F1R1	B6	Plate 1	PYCR2_Intron2_1	PYCR2	1	26	19	2	5.3	3.8				Plate1_r02c06f01p01-ch1sk1fk1fl1.tiff
B6_F1R1	B6	Plate 1	GCLM_Intron2_2	GCLM	1	41	19	3	5.3	2.4				Plate1_r02c06f01p01-ch1sk1fk1fl1.tiff
B6_F1R1	B6	Plate 1	GSR_Intron4_1	GSR	1	82	19	4	5.3	1.2				Plate1_r02c06f01p01-ch1sk1fk1fl1.tiff
B6_F1R1	B6	Plate 1	NUDT14_Intron1_1	NUDT14	1	61	19	>4	5.3	1.6				Plate1_r02c06f01p01-ch1sk1fk1fl1.tiff
B6_F1R1	B6	Plate 1	OAS3_Intron15_1	OAS3	1	39	19	>4	5.3	2.6				Plate1_r02c06f01p01-ch1sk1fk1fl1.tiff
B6_F1R1	B6	Plate 1	RPA1_Intron9_1	RPA1	1	16	19	>4	5.3	6.3				Plate1_r02c06f01p01-ch1sk1fk1fl1.tiff
B6_F1R1	B6	Plate 1	NARS2_Intron4_1	NARS2	1	7	19	>4	5.3	14.3				Plate1_r02c06f01p01-ch1sk1fk1fl1.tiff
B6_F1R1	B6	Plate 1	FMR1_Intron8_1	FMR1	1	70	19	>4	5.3	1.4				Plate1_r02c06f01p01-ch1sk1fk1fl1.tiff
B6_F1R1	B6	Plate 1	PRPS1_Intron2_2	PRPS1	1	139	19	>4	5.3	0.7				Plate1_r02c06f01p01-ch1sk1fk1fl1.tiff
B6_F1R1	B6	Plate 1	CPT1B_Intron14_1	CPT1B	1	26	19	>4	5.3	3.8				Plate1_r02c06f01p01-ch1sk1fk1fl1.tiff
B6_F1R1	B6	Plate 1	PHF10_Intron6_1	PHF10	1	35	19	>4	5.3	2.9				Plate1_r02c06f01p01-ch1sk1fk1fl1.tiff
B6_F1R1	B6	Plate 1	ACLY_Intron7_1	ACLY	1	68	19	>4	5.3	1.5				Plate1_r02c06f01p01-ch1sk1fk1fl1.tiff
B6_F1R1	B6	Plate 1	HUWE1_Intron8_1	HUWE1	1	142	19	>4	5.3	0.7				Plate1_r02c06f01p01-ch1sk1fk1fl1.tiff
B6_F1R1	B6	Plate 1	ITPA_Intron1_2	ITPA	1	31	19	>4	5.3	3.2				Plate1_r02c06f01p01-ch1sk1fk1fl1.tiff
B6_F1R2	B6	Plate 4	UBE2N_Intron1_1	UBE2N	27	88	51	1	52.9	30.7	UBE2N	UBE2N_Intron1_1	1	Plate4_r02c06f01p01-ch1sk1fk1fl1.tiff
B6_F1R2	B6	Plate 4	PRDX6_Intron2_2	PRDX6	3	50	51	2	5.9	6	UBE2N	UBE2N_Intron1_1	1	Plate4_r02c06f01p01-ch1sk1fk1fl1.tiff
B6_F1R2	B6	Plate 4	CUL4B_Intron11_1	CUL4B	3	22	51	3	5.9	13.6	UBE2N	UBE2N_Intron1_1	1	Plate4_r02c06f01p01-ch1sk1fk1fl1.tiff
B6_F1R2	B6	Plate 4	PYGO2_Intron2_2	PYGO2	2	87	51	4	3.9	2.3	UBE2N	UBE2N_Intron1_1	1	Plate4_r02c06f01p01-ch1sk1fk1fl1.tiff
B6_F1R2	B6	Plate 4	SNW1_Intron12_1	SNW1	2	67	51	>4	3.9	3	UBE2N	UBE2N_Intron1_1	1	Plate4_r02c06f01p01-ch1sk1fk1fl1.tiff
B6_F1R2	B6	Plate 4	PLCG1_Intron25_1	PLCG1	2	60	51	>4	3.9	3.3	UBE2N	UBE2N_Intron1_1	1	Plate4_r02c06f01p01-ch1sk1fk1fl1.tiff
B6_F1R2	B6	Plate 4	TALDO1_Intron7_1	TALDO1	1	45	51	>4	2	2.2	UBE2N	UBE2N_Intron1_1	1	Plate4_r02c06f01p01-ch1sk1fk1fl1.tiff
B6_F1R2	B6	Plate 4	ATIC_Intron14_1	ATIC	1	35	51	>4	2	2.9	UBE2N	UBE2N_Intron1_1	1	Plate4_r02c06f01p01-ch1sk1fk1fl1.tiff
B6_F1R2	B6	Plate 4	TARS_Intron9_1	TARS	1	22	51	>4	2	4.5	UBE2N	UBE2N_Intron1_1	1	Plate4_r02c06f01p01-ch1sk1fk1fl1.tiff
B6_F1R2	B6	Plate 4	FMR1_Intron8_1	FMR1	1	70	51	>4	2	1.4	UBE2N	UBE2N_Intron1_1	1	Plate4_r02c06f01p01-ch1sk1fk1fl1.tiff
B6_F1R2	B6	Plate 4	SV2B_Intron5_1	SV2B	1	30	51	>4	2	3.3	UBE2N	UBE2N_Intron1_1	1	Plate4_r02c06f01p01-ch1sk1fk1fl1.tiff
B6_F1R2	B6	Plate 4	ECH1_Intron9_1	ECH1	1	35	51	>4	2	2.9	UBE2N	UBE2N_Intron1_1	1	Plate4_r02c06f01p01-ch1sk1fk1fl1.tiff
B6_F1R2	B6	Plate 4	PPOX_Intron2_1	PPOX	1	50	51	>4	2	2	UBE2N	UBE2N_Intron1_1	1	Plate4_r02c06f01p01-ch1sk1fk1fl1.tiff
B6_F1R2	B6	Plate 4	SMS_Intron5_2	SMS	1	135	51	>4	2	0.7	UBE2N	UBE2N_Intron1_1	1	Plate4_r02c06f01p01-ch1sk1fk1fl1.tiff
B6_F1R2	B6	Plate 4	PARP1_Intron1_2	PARP1	1	24	51	>4	2	4.2	UBE2N	UBE2N_Intron1_1	1	Plate4_r02c06f01p01-ch1sk1fk1fl1.tiff
B6_F1R2	B6	Plate 4	GLYR1_Intron10_1	GLYR1	1	49	51	>4	2	2	UBE2N	UBE2N_Intron1_1	1	Plate4_r02c06f01p01-ch1sk1fk1fl1.tiff
B6_F1R2	B6	Plate 4	DR1_Intron3_3	DR1	1	88	51	>4	2	1.1	UBE2N	UBE2N_Intron1_1	1	Plate4_r02c06f01p01-ch1sk1fk1fl1.tiff
B6_F1R2	B6	Plate 4	GANAB_Intron20_1	GANAB	1	32	51	>4	2	3.1	UBE2N	UBE2N_Intron1_1	1	Plate4_r02c06f01p01-ch1sk1fk1fl1.tiff
B6_F1R3	B6	Plate 7	SV2B_Intron5_1	SV2B	4	30	15	1	26.7	13.3				Plate7_r02c06f01p01-ch1sk1fk1fl1.tiff
B6_F1R3	B6	Plate 7	TRMT6_Intron7_1	TRMT6	3	23	15	2	20	13				Plate7_r02c06f01p01-ch1sk1fk1fl1.tiff
B6_F1R3	B6	Plate 7	FUBP3_Intron7_1	FUBP3	1	15	15	3	6.7	6.7				Plate7_r02c06f01p01-ch1sk1fk1fl1.tiff
B6_F1R3	B6	Plate 7	PYCR2_Intron2_1	PYCR2	1	26	15	4	6.7	3.8				Plate7_r02c06f01p01-ch1sk1fk1fl1.tiff
B6_F1R3	B6	Plate 7	ALG3_Intron5_2	ALG3	1	27	15	>4	6.7	3.7				Plate7_r02c06f01p01-ch1sk1fk1fl1.tiff
B6_F1R3	B6	Plate 7	DNMT1_Intron3_1	DNMT1	1	8	15	>4	6.7	12.5				Plate7_r02c06f01p01-ch1sk1fk1fl1.tiff
B6_F1R3	B6	Plate 7	ALDH1A2_Intron6_1	ALDH1A2	1	8	15	>4	6.7	12.5				Plate7_r02c06f01p01-ch1sk1fk1fl1.tiff
B6_F1R3	B6	Plate 7	UBE2N_Intron1_2	UBE2N	1	57	15	>4	6.7	1.8				Plate7_r02c06f01p01-ch1sk1fk1fl1.tiff
B6_F1R3	B6	Plate 7	HADHA_Intron10_1	HADHA	1	42	15	>4	6.7	2.4				Plate7_r02c06f01p01-ch1sk1fk1fl1.tiff
B6_F1R3	B6	Plate 7	SMS_Intron5_2	SMS	1	135	15	>4	6.7	0.7				Plate7_r02c06f01p01-ch1sk1fk1fl1.tiff
B6_F2R1	B6	Plate 2	KARS_Intron6_1	KARS	2	30	10	1	20	6.7				Plate2_r02c06f01p01-ch1sk1fk1fl1.tiff
B6_F2R1	B6	Plate 2	PRPS1_Intron2_1	PRPS1	2	36	10	2	20	5.6				Plate2_r02c06f01p01-ch1sk1fk1fl1.tiff
B6_F2R1	B6	Plate 2	PYCR2_Intron2_1	PYCR2	1	26	10	3	10	3.8				Plate2_r02c06f01p01-ch1sk1fk1fl1.tiff
B6_F2R1	B6	Plate 2	NSUN2_Intron1_1	NSUN2	1	20	10	4	10	5				Plate2_r02c06f01p01-ch1sk1fk1fl1.tiff
B6_F2R1	B6	Plate 2	P4HB_Intron10_1	P4HB	1	47	10	>4	10	2.1				Plate2_r02c06f01p01-ch1sk1fk1fl1.tiff
B6_F2R1	B6	Plate 2	NDUFV2_Intron1_1	NDUFV2	1	49	10	>4	10	2				Plate2_r02c06f01p01-ch1sk1fk1fl1.tiff
B6_F2R1	B6	Plate 2	SUCLA2_Intron5_1	SUCLA2	1	66	10	>4	10	1.5				Plate2_r02c06f01p01-ch1sk1fk1fl1.tiff
B6_F2R1	B6	Plate 2	HADHA_Intron14_1	HADHA	1	43	10	>4	10	2.3				Plate2_r02c06f01p01-ch1sk1fk1fl1.tiff
B6_F2R2	B6	Plate 5	TARS_Intron9_1	TARS	4	22	5	1	80	18.2	TARS	TARS_Intron9_1	1	Plate5_r02c06f01p01-ch1sk1fk1fl1.tiff
B6_F2R2	B6	Plate 5	ACLY_Intron24_1	ACLY	1	23	5	2	20	4.3	TARS	TARS_Intron9_1	1	Plate5_r02c06f01p01-ch1sk1fk1fl1.tiff
B6_F2R3	B6	Plate 8	VPS4A_Intron9_1	VPS4A	9	17	11	1	81.8	52.9	VPS4A	VPS4A_Intron9_1	1	Plate8_r02c06f01p01-ch1sk1fk1fl1.tiff
B6_F2R3	B6	Plate 8	OXCT1_Intron1_1	OXCT1	1	34	11	2	9.1	2.9	VPS4A	VPS4A_Intron9_1	1	Plate8_r02c06f01p01-ch1sk1fk1fl1.tiff
B6_F2R3	B6	Plate 8	FUBP3_Intron7_1	FUBP3	1	15	11	3	9.1	6.7	VPS4A	VPS4A_Intron9_1	1	Plate8_r02c06f01p01-ch1sk1fk1fl1.tiff
B6_F3R1	B6	Plate 3	PFKP_Intron1_1	PFKP	2	2	10	1	20	100				Plate3_r02c06f01p01-ch1sk1fk1fl1.tiff
B6_F3R1	B6	Plate 3	SET_Intron7_1	SET	1	29	10	2	10	3.4				Plate3_r02c06f01p01-ch1sk1fk1fl1.tiff
B6_F3R1	B6	Plate 3	DPYSL2_Intron7_1	DPYSL2	1	116	10	3	10	0.9				Plate3_r02c06f01p01-ch1sk1fk1fl1.tiff
B6_F3R1	B6	Plate 3	PFKL_Intron12_1	PFKL	1	27	10	4	10	3.7				Plate3_r02c06f01p01-ch1sk1fk1fl1.tiff
B6_F3R1	B6	Plate 3	HCFC1_Intron18_1	HCFC1	1	37	10	>4	10	2.7				Plate3_r02c06f01p01-ch1sk1fk1fl1.tiff
B6_F3R1	B6	Plate 3	NAT10_Intron7_1	NAT10	1	27	10	>4	10	3.7				Plate3_r02c06f01p01-ch1sk1fk1fl1.tiff
B6_F3R1	B6	Plate 3	GARS_Intron6_1	GARS	1	20	10	>4	10	5				Plate3_r02c06f01p01-ch1sk1fk1fl1.tiff
B6_F3R1	B6	Plate 3	NXN_Intron7_1	NXN	1	85	10	>4	10	1.2				Plate3_r02c06f01p01-ch1sk1fk1fl1.tiff
B6_F3R1	B6	Plate 3	MTHFD1_Intron22_2	MTHFD1	1	74	10	>4	10	1.4				Plate3_r02c06f01p01-ch1sk1fk1fl1.tiff
B6_F3R2	B6	Plate 6	GANAB_Intron20_1	GANAB	2	32	7	1	28.6	6.3				Plate6_r02c06f01p01-ch1sk1fk1fl1.tiff
B6_F3R2	B6	Plate 6	SET_Intron7_1	SET	1	29	7	2	14.3	3.4				Plate6_r02c06f01p01-ch1sk1fk1fl1.tiff
B6_F3R2	B6	Plate 6	SNW1_Intron12_1	SNW1	1	67	7	3	14.3	1.5				Plate6_r02c06f01p01-ch1sk1fk1fl1.tiff
B6_F3R2	B6	Plate 6	CYB5R3_Intron2_1	CYB5R3	1	270	7	4	14.3	0.4				Plate6_r02c06f01p01-ch1sk1fk1fl1.tiff
B6_F3R2	B6	Plate 6	OSBPL11_Intron12_1	OSBPL11	1	74	7	>4	14.3	1.4				Plate6_r02c06f01p01-ch1sk1fk1fl1.tiff
B6_F3R2	B6	Plate 6	RLF_Intron7_1	RLF	1	43	7	>4	14.3	2.3				Plate6_r02c06f01p01-ch1sk1fk1fl1.tiff
B7_F1R1	B7	Plate 1	CUL4B_Intron20_1	CUL4B	10	94	15	1	66.7	10.6	CUL4B	CUL4B_Intron20_1	1	Plate1_r02c07f01p01-ch1sk1fk1fl1.tiff
B7_F1R1	B7	Plate 1	NSUN2_Intron1_1	NSUN2	1	20	15	2	6.7	5	CUL4B	CUL4B_Intron20_1	1	Plate1_r02c07f01p01-ch1sk1fk1fl1.tiff
B7_F1R1	B7	Plate 1	ACLY_Intron7_1	ACLY	1	68	15	3	6.7	1.5	CUL4B	CUL4B_Intron20_1	1	Plate1_r02c07f01p01-ch1sk1fk1fl1.tiff
B7_F1R1	B7	Plate 1	ALDH7A1_Intron1_1	ALDH7A1	1	81	15	4	6.7	1.2	CUL4B	CUL4B_Intron20_1	1	Plate1_r02c07f01p01-ch1sk1fk1fl1.tiff
B7_F1R1	B7	Plate 1	PRPS1_Intron2_2	PRPS1	1	139	15	>4	6.7	0.7	CUL4B	CUL4B_Intron20_1	1	Plate1_r02c07f01p01-ch1sk1fk1fl1.tiff
B7_F1R1	B7	Plate 1	ITPA_Intron1_2	ITPA	1	31	15	>4	6.7	3.2	CUL4B	CUL4B_Intron20_1	1	Plate1_r02c07f01p01-ch1sk1fk1fl1.tiff
B7_F1R2	B7	Plate 4	GANAB_Intron20_1	GANAB	20	32	22	1	90.9	62.5	GANAB	GANAB_Intron20_1	1	Plate4_r02c07f01p01-ch1sk1fk1fl1.tiff
B7_F1R2	B7	Plate 4	TARS_Intron9_1	TARS	1	22	22	2	4.5	4.5	GANAB	GANAB_Intron20_1	1	Plate4_r02c07f01p01-ch1sk1fk1fl1.tiff
B7_F1R2	B7	Plate 4	FASN_Intron22_1	FASN	1	55	22	3	4.5	1.8	GANAB	GANAB_Intron20_1	1	Plate4_r02c07f01p01-ch1sk1fk1fl1.tiff
B7_F1R3	B7	Plate 7	OSBPL11_Intron12_1	OSBPL11	7	74	9	1	77.8	9.5	OSBPL11	OSBPL11_Intron12_1	1	Plate7_r02c07f01p01-ch1sk1fk1fl1.tiff
B7_F1R3	B7	Plate 7	HADH_Intron2_1	HADH	1	148	9	2	11.1	0.7	OSBPL11	OSBPL11_Intron12_1	1	Plate7_r02c07f01p01-ch1sk1fk1fl1.tiff
B7_F1R3	B7	Plate 7	ANGPTL4_Intron2_2	ANGPTL4	1	72	9	3	11.1	1.4	OSBPL11	OSBPL11_Intron12_1	1	Plate7_r02c07f01p01-ch1sk1fk1fl1.tiff
B7_F2R1	B7	Plate 2	ACAT1_Intron1_1	ACAT1	1	37	11	1	9.1	2.7				Plate2_r02c07f01p01-ch1sk1fk1fl1.tiff
B7_F2R1	B7	Plate 2	GCLM_Intron1_1	GCLM	1	24	11	2	9.1	4.2				Plate2_r02c07f01p01-ch1sk1fk1fl1.tiff
B7_F2R1	B7	Plate 2	EZH2_Intron4_1	EZH2	1	90	11	3	9.1	1.1				Plate2_r02c07f01p01-ch1sk1fk1fl1.tiff
B7_F2R1	B7	Plate 2	NUDT3_Intron1_2	NUDT3	1	29	11	4	9.1	3.4				Plate2_r02c07f01p01-ch1sk1fk1fl1.tiff
B7_F2R1	B7	Plate 2	SDHA_Intron9_1	SDHA	1	31	11	>4	9.1	3.2				Plate2_r02c07f01p01-ch1sk1fk1fl1.tiff
B7_F2R1	B7	Plate 2	HSD17B10_Intron4_1	HSD17B10	1	73	11	>4	9.1	1.4				Plate2_r02c07f01p01-ch1sk1fk1fl1.tiff
B7_F2R1	B7	Plate 2	PLB1_Intron15_1	PLB1	1	4	11	>4	9.1	25				Plate2_r02c07f01p01-ch1sk1fk1fl1.tiff
B7_F2R1	B7	Plate 2	PHF10_Intron6_1	PHF10	1	35	11	>4	9.1	2.9				Plate2_r02c07f01p01-ch1sk1fk1fl1.tiff
B7_F2R1	B7	Plate 2	COX5B_Intron2_2	COX5B	1	11	11	>4	9.1	9.1				Plate2_r02c07f01p01-ch1sk1fk1fl1.tiff
B7_F2R1	B7	Plate 2	FH_Intron3_1	FH	1	100	11	>4	9.1	1				Plate2_r02c07f01p01-ch1sk1fk1fl1.tiff
B7_F2R1	B7	Plate 2	IDE_Intron13_1	IDE	1	94	11	>4	9.1	1.1				Plate2_r02c07f01p01-ch1sk1fk1fl1.tiff
B7_F2R2	B7	Plate 5	ALG3_Intron5_2	ALG3	20	27	56	1	35.7	74.1	ALG3;SV2B	ALG3_Intron5_2;SV2B_Intron5_1	2	Plate5_r02c07f01p01-ch1sk1fk1fl1.tiff
B7_F2R2	B7	Plate 5	SV2B_Intron5_1	SV2B	17	30	56	2	30.4	56.7	ALG3;SV2B	ALG3_Intron5_2;SV2B_Intron5_1	2	Plate5_r02c07f01p01-ch1sk1fk1fl1.tiff
B7_F2R2	B7	Plate 5	TRMT6_Intron7_1	TRMT6	10	23	56	3	17.9	43.5	ALG3;SV2B	ALG3_Intron5_2;SV2B_Intron5_1	2	Plate5_r02c07f01p01-ch1sk1fk1fl1.tiff
B7_F2R2	B7	Plate 5	SNW1_Intron12_1	SNW1	3	67	56	4	5.4	4.5	ALG3;SV2B	ALG3_Intron5_2;SV2B_Intron5_1	2	Plate5_r02c07f01p01-ch1sk1fk1fl1.tiff
B7_F2R2	B7	Plate 5	UBE2N_Intron1_1	UBE2N	1	88	56	>4	1.8	1.1	ALG3;SV2B	ALG3_Intron5_2;SV2B_Intron5_1	2	Plate5_r02c07f01p01-ch1sk1fk1fl1.tiff
B7_F2R2	B7	Plate 5	MBOAT1_Intron1_1	MBOAT1	1	2	56	>4	1.8	50	ALG3;SV2B	ALG3_Intron5_2;SV2B_Intron5_1	2	Plate5_r02c07f01p01-ch1sk1fk1fl1.tiff
B7_F2R2	B7	Plate 5	COX6C_Intron2_2	COX6C	1	74	56	>4	1.8	1.4	ALG3;SV2B	ALG3_Intron5_2;SV2B_Intron5_1	2	Plate5_r02c07f01p01-ch1sk1fk1fl1.tiff
B7_F2R2	B7	Plate 5	NDUFB6_Intron2_2	NDUFB6	1	18	56	>4	1.8	5.6	ALG3;SV2B	ALG3_Intron5_2;SV2B_Intron5_1	2	Plate5_r02c07f01p01-ch1sk1fk1fl1.tiff
B7_F2R2	B7	Plate 5	CS_Intron3_1	CS	1	53	56	>4	1.8	1.9	ALG3;SV2B	ALG3_Intron5_2;SV2B_Intron5_1	2	Plate5_r02c07f01p01-ch1sk1fk1fl1.tiff
B7_F2R2	B7	Plate 5	HADHA_Intron14_1	HADHA	1	43	56	>4	1.8	2.3	ALG3;SV2B	ALG3_Intron5_2;SV2B_Intron5_1	2	Plate5_r02c07f01p01-ch1sk1fk1fl1.tiff
B7_F2R3	B7	Plate 8	SV2B_Intron5_1	SV2B	1	30	2	1	50	3.3
B7_F2R3	B7	Plate 8	DR1_Intron3_3	DR1	1	88	2	2	50	1.1
B7_F3R1	B7	Plate 3	FMR1_Intron8_1	FMR1	21	70	28	1	75	30	FMR1	FMR1_Intron8_1	1	Plate3_r02c07f01p01-ch1sk1fk1fl1.tiff
B7_F3R1	B7	Plate 3	CUL4B_Intron11_1	CUL4B	2	22	28	2	7.1	9.1	FMR1	FMR1_Intron8_1	1	Plate3_r02c07f01p01-ch1sk1fk1fl1.tiff
B7_F3R1	B7	Plate 3	NUDT14_Intron1_1	NUDT14	1	61	28	3	3.6	1.6	FMR1	FMR1_Intron8_1	1	Plate3_r02c07f01p01-ch1sk1fk1fl1.tiff
B7_F3R1	B7	Plate 3	P4HB_Intron10_1	P4HB	1	47	28	4	3.6	2.1	FMR1	FMR1_Intron8_1	1	Plate3_r02c07f01p01-ch1sk1fk1fl1.tiff
B7_F3R1	B7	Plate 3	HSD17B10_Intron4_1	HSD17B10	1	73	28	>4	3.6	1.4	FMR1	FMR1_Intron8_1	1	Plate3_r02c07f01p01-ch1sk1fk1fl1.tiff
B7_F3R1	B7	Plate 3	GFPT1_Intron19_1	GFPT1	1	85	28	>4	3.6	1.2	FMR1	FMR1_Intron8_1	1	Plate3_r02c07f01p01-ch1sk1fk1fl1.tiff
B7_F3R1	B7	Plate 3	DR1_Intron3_3	DR1	1	88	28	>4	3.6	1.1	FMR1	FMR1_Intron8_1	1	Plate3_r02c07f01p01-ch1sk1fk1fl1.tiff
B7_F3R2	B7	Plate 6	CUL4B_Intron11_1	CUL4B	14	22	21	1	66.7	63.6	CUL4B	CUL4B_Intron11_1	1	Plate6_r02c07f01p01-ch1sk1fk1fl1.tiff
B7_F3R2	B7	Plate 6	GLYR1_Intron8_1	GLYR1	1	17	21	2	4.8	5.9	CUL4B	CUL4B_Intron11_1	1	Plate6_r02c07f01p01-ch1sk1fk1fl1.tiff
B7_F3R2	B7	Plate 6	NUDT5_Intron2_2	NUDT5	1	9	21	3	4.8	11.1	CUL4B	CUL4B_Intron11_1	1	Plate6_r02c07f01p01-ch1sk1fk1fl1.tiff
B7_F3R2	B7	Plate 6	KMT5A_Intron2_1	KMT5A	1	141	21	4	4.8	0.7	CUL4B	CUL4B_Intron11_1	1	Plate6_r02c07f01p01-ch1sk1fk1fl1.tiff
B7_F3R2	B7	Plate 6	MAGT1_Intron6_1	MAGT1	1	57	21	>4	4.8	1.8	CUL4B	CUL4B_Intron11_1	1	Plate6_r02c07f01p01-ch1sk1fk1fl1.tiff
B7_F3R2	B7	Plate 6	NDUFAF2_Intron3_3	NDUFAF2	1	22	21	>4	4.8	4.5	CUL4B	CUL4B_Intron11_1	1	Plate6_r02c07f01p01-ch1sk1fk1fl1.tiff
B7_F3R2	B7	Plate 6	UQCRC2_Intron11_1	UQCRC2	1	86	21	>4	4.8	1.2	CUL4B	CUL4B_Intron11_1	1	Plate6_r02c07f01p01-ch1sk1fk1fl1.tiff
B7_F3R2	B7	Plate 6	DR1_Intron3_3	DR1	1	88	21	>4	4.8	1.1	CUL4B	CUL4B_Intron11_1	1	Plate6_r02c07f01p01-ch1sk1fk1fl1.tiff
B7_F3R3	B7	Plate 9	FUBP3_Intron7_1	FUBP3	1	15	3	1	33.3	6.7
B7_F3R3	B7	Plate 9	GCLM_Intron2_2	GCLM	1	41	3	2	33.3	2.4
B7_F3R3	B7	Plate 9	KMT5A_Intron2_1	KMT5A	1	141	3	3	33.3	0.7
B8_F1R1	B8	Plate 1	HSD17B10_Intron4_1	HSD17B10	59	73	79	1	74.7	80.8	HSD17B10	HSD17B10_Intron4_1	1	Plate1_r02c08f01p01-ch1sk1fk1fl1.tiff
B8_F1R1	B8	Plate 1	PHF10_Intron6_1	PHF10	2	35	79	2	2.5	5.7	HSD17B10	HSD17B10_Intron4_1	1	Plate1_r02c08f01p01-ch1sk1fk1fl1.tiff
B8_F1R1	B8	Plate 1	PRPS1_Intron2_2	PRPS1	2	139	79	3	2.5	1.4	HSD17B10	HSD17B10_Intron4_1	1	Plate1_r02c08f01p01-ch1sk1fk1fl1.tiff
B8_F1R1	B8	Plate 1	SDHA_Intron9_1	SDHA	2	31	79	4	2.5	6.5	HSD17B10	HSD17B10_Intron4_1	1	Plate1_r02c08f01p01-ch1sk1fk1fl1.tiff
B8_F1R1	B8	Plate 1	CYP7A1_Intron2_2	CYP7A1	2	82	79	>4	2.5	2.4	HSD17B10	HSD17B10_Intron4_1	1	Plate1_r02c08f01p01-ch1sk1fk1fl1.tiff
B8_F1R1	B8	Plate 1	TXNDC5_Intron5_1	TXNDC5	1	63	79	>4	1.3	1.6	HSD17B10	HSD17B10_Intron4_1	1	Plate1_r02c08f01p01-ch1sk1fk1fl1.tiff
B8_F1R1	B8	Plate 1	P4HB_Intron10_1	P4HB	1	47	79	>4	1.3	2.1	HSD17B10	HSD17B10_Intron4_1	1	Plate1_r02c08f01p01-ch1sk1fk1fl1.tiff
B8_F1R1	B8	Plate 1	NUDT14_Intron1_1	NUDT14	1	61	79	>4	1.3	1.6	HSD17B10	HSD17B10_Intron4_1	1	Plate1_r02c08f01p01-ch1sk1fk1fl1.tiff
B8_F1R1	B8	Plate 1	GATAD2A_Intron7_1	GATAD2A	1	58	79	>4	1.3	1.7	HSD17B10	HSD17B10_Intron4_1	1	Plate1_r02c08f01p01-ch1sk1fk1fl1.tiff
B8_F1R1	B8	Plate 1	MORF4L1_Intron9_1	MORF4L1	1	39	79	>4	1.3	2.6	HSD17B10	HSD17B10_Intron4_1	1	Plate1_r02c08f01p01-ch1sk1fk1fl1.tiff
B8_F1R1	B8	Plate 1	NUDT12_Intron6_2	NUDT12	1	10	79	>4	1.3	10	HSD17B10	HSD17B10_Intron4_1	1	Plate1_r02c08f01p01-ch1sk1fk1fl1.tiff
B8_F1R1	B8	Plate 1	OTC_Intron7_1	OTC	1	19	79	>4	1.3	5.3	HSD17B10	HSD17B10_Intron4_1	1	Plate1_r02c08f01p01-ch1sk1fk1fl1.tiff
B8_F1R1	B8	Plate 1	MAGT1_Intron6_1	MAGT1	1	57	79	>4	1.3	1.8	HSD17B10	HSD17B10_Intron4_1	1	Plate1_r02c08f01p01-ch1sk1fk1fl1.tiff
B8_F1R1	B8	Plate 1	OAT_Intron6_1	OAT	1	121	79	>4	1.3	0.8	HSD17B10	HSD17B10_Intron4_1	1	Plate1_r02c08f01p01-ch1sk1fk1fl1.tiff
B8_F1R1	B8	Plate 1	FH_Intron5_1	FH	1	20	79	>4	1.3	5	HSD17B10	HSD17B10_Intron4_1	1	Plate1_r02c08f01p01-ch1sk1fk1fl1.tiff
B8_F1R1	B8	Plate 1	ANGPTL4_Intron2_2	ANGPTL4	1	72	79	>4	1.3	1.4	HSD17B10	HSD17B10_Intron4_1	1	Plate1_r02c08f01p01-ch1sk1fk1fl1.tiff
B8_F1R1	B8	Plate 1	ACLY_Intron7_1	ACLY	1	68	79	>4	1.3	1.5	HSD17B10	HSD17B10_Intron4_1	1	Plate1_r02c08f01p01-ch1sk1fk1fl1.tiff
B8_F1R2	B8	Plate 4	CYP7A1_Intron2_2	CYP7A1	33	82	68	1	48.5	40.2	CYP7A1;KMT5A	CYP7A1_Intron2_2;KMT5A_Intron2_1	2	Plate4_r02c08f01p01-ch1sk1fk1fl1.tiff
B8_F1R2	B8	Plate 4	KMT5A_Intron2_1	KMT5A	22	141	68	2	32.4	15.6	CYP7A1;KMT5A	CYP7A1_Intron2_2;KMT5A_Intron2_1	2	Plate4_r02c08f01p01-ch1sk1fk1fl1.tiff
B8_F1R2	B8	Plate 4	TRMT6_Intron7_1	TRMT6	2	23	68	3	2.9	8.7	CYP7A1;KMT5A	CYP7A1_Intron2_2;KMT5A_Intron2_1	2	Plate4_r02c08f01p01-ch1sk1fk1fl1.tiff
B8_F1R2	B8	Plate 4	DHRS2_Intron3_1	DHRS2	1	7	68	4	1.5	14.3	CYP7A1;KMT5A	CYP7A1_Intron2_2;KMT5A_Intron2_1	2	Plate4_r02c08f01p01-ch1sk1fk1fl1.tiff
B8_F1R2	B8	Plate 4	TARS_Intron9_1	TARS	1	22	68	>4	1.5	4.5	CYP7A1;KMT5A	CYP7A1_Intron2_2;KMT5A_Intron2_1	2	Plate4_r02c08f01p01-ch1sk1fk1fl1.tiff
B8_F1R2	B8	Plate 4	UAP1_Intron10_1	UAP1	1	10	68	>4	1.5	10	CYP7A1;KMT5A	CYP7A1_Intron2_2;KMT5A_Intron2_1	2	Plate4_r02c08f01p01-ch1sk1fk1fl1.tiff
B8_F1R2	B8	Plate 4	PLOD3_Intron8_1	PLOD3	1	90	68	>4	1.5	1.1	CYP7A1;KMT5A	CYP7A1_Intron2_2;KMT5A_Intron2_1	2	Plate4_r02c08f01p01-ch1sk1fk1fl1.tiff
B8_F1R2	B8	Plate 4	FUBP3_Intron9_1	FUBP3	1	66	68	>4	1.5	1.5	CYP7A1;KMT5A	CYP7A1_Intron2_2;KMT5A_Intron2_1	2	Plate4_r02c08f01p01-ch1sk1fk1fl1.tiff
B8_F1R2	B8	Plate 4	NDUFA4_Intron3_1	NDUFA4	1	59	68	>4	1.5	1.7	CYP7A1;KMT5A	CYP7A1_Intron2_2;KMT5A_Intron2_1	2	Plate4_r02c08f01p01-ch1sk1fk1fl1.tiff
B8_F1R2	B8	Plate 4	MAGT1_Intron6_1	MAGT1	1	57	68	>4	1.5	1.8	CYP7A1;KMT5A	CYP7A1_Intron2_2;KMT5A_Intron2_1	2	Plate4_r02c08f01p01-ch1sk1fk1fl1.tiff
B8_F1R2	B8	Plate 4	P4HB_Intron6_1	P4HB	1	103	68	>4	1.5	1	CYP7A1;KMT5A	CYP7A1_Intron2_2;KMT5A_Intron2_1	2	Plate4_r02c08f01p01-ch1sk1fk1fl1.tiff
B8_F1R2	B8	Plate 4	SNW1_Intron12_1	SNW1	1	67	68	>4	1.5	1.5	CYP7A1;KMT5A	CYP7A1_Intron2_2;KMT5A_Intron2_1	2	Plate4_r02c08f01p01-ch1sk1fk1fl1.tiff
B8_F1R2	B8	Plate 4	EBPL_Intron1_1	EBPL	1	15	68	>4	1.5	6.7	CYP7A1;KMT5A	CYP7A1_Intron2_2;KMT5A_Intron2_1	2	Plate4_r02c08f01p01-ch1sk1fk1fl1.tiff
B8_F1R2	B8	Plate 4	CS_Intron3_1	CS	1	53	68	>4	1.5	1.9	CYP7A1;KMT5A	CYP7A1_Intron2_2;KMT5A_Intron2_1	2	Plate4_r02c08f01p01-ch1sk1fk1fl1.tiff
B8_F1R3	B8	Plate 7	ACOT7_Intron2_2	ACOT7	10	115	15	1	66.7	8.7	ACOT7	ACOT7_Intron2_2	1	Plate7_r02c08f01p01-ch1sk1fk1fl1.tiff
B8_F1R3	B8	Plate 7	FUBP3_Intron7_1	FUBP3	1	15	15	2	6.7	6.7	ACOT7	ACOT7_Intron2_2	1	Plate7_r02c08f01p01-ch1sk1fk1fl1.tiff
B8_F1R3	B8	Plate 7	APEH_Intron10_1	APEH	1	7	15	3	6.7	14.3	ACOT7	ACOT7_Intron2_2	1	Plate7_r02c08f01p01-ch1sk1fk1fl1.tiff
B8_F1R3	B8	Plate 7	DDB1_Intron18_1	DDB1	1	27	15	4	6.7	3.7	ACOT7	ACOT7_Intron2_2	1	Plate7_r02c08f01p01-ch1sk1fk1fl1.tiff
B8_F1R3	B8	Plate 7	RTF1_Intron1_1	RTF1	1	1	15	>4	6.7	100	ACOT7	ACOT7_Intron2_2	1	Plate7_r02c08f01p01-ch1sk1fk1fl1.tiff
B8_F1R3	B8	Plate 7	ACLY_Intron16_1	ACLY	1	25	15	>4	6.7	4	ACOT7	ACOT7_Intron2_2	1	Plate7_r02c08f01p01-ch1sk1fk1fl1.tiff
B8_F2R1	B8	Plate 2	BRD8_Intron13_1	BRD8	14	22	18	1	77.8	63.6	BRD8	BRD8_Intron13_1	1	Plate2_r02c08f01p01-ch1sk1fk1fl1.tiff
B8_F2R1	B8	Plate 2	PYGO2_Intron2_2	PYGO2	2	87	18	2	11.1	2.3	BRD8	BRD8_Intron13_1	1	Plate2_r02c08f01p01-ch1sk1fk1fl1.tiff
B8_F2R1	B8	Plate 2	SDHA_Intron9_1	SDHA	1	31	18	3	5.6	3.2	BRD8	BRD8_Intron13_1	1	Plate2_r02c08f01p01-ch1sk1fk1fl1.tiff
B8_F2R1	B8	Plate 2	SGF29_Intron9_1	SGF29	1	52	18	4	5.6	1.9	BRD8	BRD8_Intron13_1	1	Plate2_r02c08f01p01-ch1sk1fk1fl1.tiff
B8_F2R2	B8	Plate 5	GLYR1_Intron8_1	GLYR1	9	17	10	1	90	52.9	GLYR1	GLYR1_Intron8_1	1	Plate5_r02c08f01p01-ch1sk1fk1fl1.tiff
B8_F2R2	B8	Plate 5	NT5C3A_Intron1_1	NT5C3A	1	85	10	2	10	1.2	GLYR1	GLYR1_Intron8_1	1	Plate5_r02c08f01p01-ch1sk1fk1fl1.tiff
B8_F3R1	B8	Plate 3	ITPA_Intron1_2	ITPA	9	31	11	1	81.8	29	ITPA	ITPA_Intron1_2	1	Plate3_r02c08f01p01-ch1sk1fk1fl1.tiff
B8_F3R1	B8	Plate 3	NDUFV2_Intron1_1	NDUFV2	1	49	11	2	9.1	2	ITPA	ITPA_Intron1_2	1	Plate3_r02c08f01p01-ch1sk1fk1fl1.tiff
B8_F3R1	B8	Plate 3	IDI1_Intron4_3	IDI1	1	100	11	3	9.1	1	ITPA	ITPA_Intron1_2	1	Plate3_r02c08f01p01-ch1sk1fk1fl1.tiff
B8_F3R2	B8	Plate 6	HAGHL_Intron2_1	HAGHL	10	14	12	1	83.3	71.4	HAGHL	HAGHL_Intron2_1	1	Plate6_r02c08f01p01-ch1sk1fk1fl1.tiff
B8_F3R2	B8	Plate 6	FMR1_Intron12_1	FMR1	1	112	12	2	8.3	0.9	HAGHL	HAGHL_Intron2_1	1	Plate6_r02c08f01p01-ch1sk1fk1fl1.tiff
B8_F3R2	B8	Plate 6	UQCRC2_Intron11_1	UQCRC2	1	86	12	3	8.3	1.2	HAGHL	HAGHL_Intron2_1	1	Plate6_r02c08f01p01-ch1sk1fk1fl1.tiff
B8_F3R3	B8	Plate 9	PFKM_Intron10_1	PFKM	1	18	2	1	50	5.6
B8_F3R3	B8	Plate 9	ACOT7_Intron2_2	ACOT7	1	115	2	2	50	0.9
B9_F1R1	B9	Plate 1	SPTLC2_Intron1_1	SPTLC2	32	42	39	1	82.1	76.2	SPTLC2	SPTLC2_Intron1_1	1	Plate1_r02c09f01p01-ch1sk1fk1fl1.tiff
B9_F1R1	B9	Plate 1	SDHA_Intron9_1	SDHA	2	31	39	2	5.1	6.5	SPTLC2	SPTLC2_Intron1_1	1	Plate1_r02c09f01p01-ch1sk1fk1fl1.tiff
B9_F1R1	B9	Plate 1	HMGA2_Intron1_1	HMGA2	1	93	39	3	2.6	1.1	SPTLC2	SPTLC2_Intron1_1	1	Plate1_r02c09f01p01-ch1sk1fk1fl1.tiff
B9_F1R1	B9	Plate 1	GTF3C4_Intron1_1	GTF3C4	1	44	39	4	2.6	2.3	SPTLC2	SPTLC2_Intron1_1	1	Plate1_r02c09f01p01-ch1sk1fk1fl1.tiff
B9_F1R1	B9	Plate 1	FUBP3_Intron13_1	FUBP3	1	66	39	>4	2.6	1.5	SPTLC2	SPTLC2_Intron1_1	1	Plate1_r02c09f01p01-ch1sk1fk1fl1.tiff
B9_F1R1	B9	Plate 1	GLO1_Intron1_1	GLO1	1	31	39	>4	2.6	3.2	SPTLC2	SPTLC2_Intron1_1	1	Plate1_r02c09f01p01-ch1sk1fk1fl1.tiff
B9_F1R1	B9	Plate 1	OSBPL11_Intron12_1	OSBPL11	1	74	39	>4	2.6	1.4	SPTLC2	SPTLC2_Intron1_1	1	Plate1_r02c09f01p01-ch1sk1fk1fl1.tiff
B9_F1R2	B9	Plate 4	GPD2_Intron2_1	GPD2	35	41	47	1	74.5	85.4	GPD2	GPD2_Intron2_1	1	Plate4_r02c09f01p01-ch1sk1fk1fl1.tiff
B9_F1R2	B9	Plate 4	PLCG1_Intron7_1	PLCG1	1	13	47	2	2.1	7.7	GPD2	GPD2_Intron2_1	1	Plate4_r02c09f01p01-ch1sk1fk1fl1.tiff
B9_F1R2	B9	Plate 4	GSR_Intron4_1	GSR	1	82	47	3	2.1	1.2	GPD2	GPD2_Intron2_1	1	Plate4_r02c09f01p01-ch1sk1fk1fl1.tiff
B9_F1R2	B9	Plate 4	UBE2N_Intron1_1	UBE2N	1	88	47	4	2.1	1.1	GPD2	GPD2_Intron2_1	1	Plate4_r02c09f01p01-ch1sk1fk1fl1.tiff
B9_F1R2	B9	Plate 4	SV2B_Intron5_1	SV2B	1	30	47	>4	2.1	3.3	GPD2	GPD2_Intron2_1	1	Plate4_r02c09f01p01-ch1sk1fk1fl1.tiff
B9_F1R2	B9	Plate 4	CYP7A1_Intron2_2	CYP7A1	1	82	47	>4	2.1	1.2	GPD2	GPD2_Intron2_1	1	Plate4_r02c09f01p01-ch1sk1fk1fl1.tiff
B9_F1R2	B9	Plate 4	VPS4A_Intron9_1	VPS4A	1	17	47	>4	2.1	5.9	GPD2	GPD2_Intron2_1	1	Plate4_r02c09f01p01-ch1sk1fk1fl1.tiff
B9_F1R2	B9	Plate 4	ALDH7A1_Intron1_1	ALDH7A1	1	81	47	>4	2.1	1.2	GPD2	GPD2_Intron2_1	1	Plate4_r02c09f01p01-ch1sk1fk1fl1.tiff
B9_F1R2	B9	Plate 4	H2AFY_Intron4_1	H2AFY	1	73	47	>4	2.1	1.4	GPD2	GPD2_Intron2_1	1	Plate4_r02c09f01p01-ch1sk1fk1fl1.tiff
B9_F1R2	B9	Plate 4	OSBPL11_Intron12_1	OSBPL11	1	74	47	>4	2.1	1.4	GPD2	GPD2_Intron2_1	1	Plate4_r02c09f01p01-ch1sk1fk1fl1.tiff
B9_F1R2	B9	Plate 4	HADHA_Intron14_1	HADHA	1	43	47	>4	2.1	2.3	GPD2	GPD2_Intron2_1	1	Plate4_r02c09f01p01-ch1sk1fk1fl1.tiff
B9_F1R2	B9	Plate 4	COX5B_Intron2_2	COX5B	1	11	47	>4	2.1	9.1	GPD2	GPD2_Intron2_1	1	Plate4_r02c09f01p01-ch1sk1fk1fl1.tiff
B9_F1R2	B9	Plate 4	UQCRC2_Intron11_1	UQCRC2	1	86	47	>4	2.1	1.2	GPD2	GPD2_Intron2_1	1	Plate4_r02c09f01p01-ch1sk1fk1fl1.tiff
B9_F1R3	B9	Plate 7	NDUFS6_Intron3_1	NDUFS6	10	43	18	1	55.6	23.3	NDUFS6	NDUFS6_Intron3_1	1	Plate7_r02c09f01p01-ch1sk1fk1fl1.tiff
B9_F1R3	B9	Plate 7	ACOT7_Intron2_2	ACOT7	2	115	18	2	11.1	1.7	NDUFS6	NDUFS6_Intron3_1	1	Plate7_r02c09f01p01-ch1sk1fk1fl1.tiff
B9_F1R3	B9	Plate 7	H2AFY_Intron4_1	H2AFY	2	73	18	3	11.1	2.7	NDUFS6	NDUFS6_Intron3_1	1	Plate7_r02c09f01p01-ch1sk1fk1fl1.tiff
B9_F1R3	B9	Plate 7	DDB1_Intron18_1	DDB1	1	27	18	4	5.6	3.7	NDUFS6	NDUFS6_Intron3_1	1	Plate7_r02c09f01p01-ch1sk1fk1fl1.tiff
B9_F1R3	B9	Plate 7	FUBP3_Intron13_1	FUBP3	1	66	18	>4	5.6	1.5	NDUFS6	NDUFS6_Intron3_1	1	Plate7_r02c09f01p01-ch1sk1fk1fl1.tiff
B9_F1R3	B9	Plate 7	ECHS1_Intron7_2	ECHS1	1	27	18	>4	5.6	3.7	NDUFS6	NDUFS6_Intron3_1	1	Plate7_r02c09f01p01-ch1sk1fk1fl1.tiff
B9_F1R3	B9	Plate 7	HADHA_Intron15_1	HADHA	1	59	18	>4	5.6	1.7	NDUFS6	NDUFS6_Intron3_1	1	Plate7_r02c09f01p01-ch1sk1fk1fl1.tiff
B9_F2R1	B9	Plate 2	BLVRA_Intron2_1	BLVRA	20	24	25	1	80	83.3	BLVRA	BLVRA_Intron2_1	1	Plate2_r02c09f01p01-ch1sk1fk1fl1.tiff
B9_F2R1	B9	Plate 2	BCAT2_Intron2_1	BCAT2	1	39	25	2	4	2.6	BLVRA	BLVRA_Intron2_1	1	Plate2_r02c09f01p01-ch1sk1fk1fl1.tiff
B9_F2R1	B9	Plate 2	NUDT14_Intron1_1	NUDT14	1	61	25	3	4	1.6	BLVRA	BLVRA_Intron2_1	1	Plate2_r02c09f01p01-ch1sk1fk1fl1.tiff
B9_F2R1	B9	Plate 2	KDM6A_Intron13_1	KDM6A	1	28	25	4	4	3.6	BLVRA	BLVRA_Intron2_1	1	Plate2_r02c09f01p01-ch1sk1fk1fl1.tiff
B9_F2R1	B9	Plate 2	MAGT1_Intron6_1	MAGT1	1	57	25	>4	4	1.8	BLVRA	BLVRA_Intron2_1	1	Plate2_r02c09f01p01-ch1sk1fk1fl1.tiff
B9_F2R1	B9	Plate 2	SMAD4_Intron2_1	SMAD4	1	80	25	>4	4	1.3	BLVRA	BLVRA_Intron2_1	1	Plate2_r02c09f01p01-ch1sk1fk1fl1.tiff
B9_F2R2	B9	Plate 5	MAGT1_Intron6_1	MAGT1	6	57	15	1	40	10.5				Plate5_r02c09f01p01-ch1sk1fk1fl1.tiff
B9_F2R2	B9	Plate 5	PPOX_Intron2_1	PPOX	5	50	15	2	33.3	10				Plate5_r02c09f01p01-ch1sk1fk1fl1.tiff
B9_F2R2	B9	Plate 5	PLOD3_Intron8_1	PLOD3	1	90	15	3	6.7	1.1				Plate5_r02c09f01p01-ch1sk1fk1fl1.tiff
B9_F2R2	B9	Plate 5	SORD_Intron1_2	SORD	1	38	15	4	6.7	2.6				Plate5_r02c09f01p01-ch1sk1fk1fl1.tiff
B9_F2R2	B9	Plate 5	OAT_Intron6_1	OAT	1	121	15	>4	6.7	0.8				Plate5_r02c09f01p01-ch1sk1fk1fl1.tiff
B9_F2R2	B9	Plate 5	BRPF3_Intron9_1	BRPF3	1	30	15	>4	6.7	3.3				Plate5_r02c09f01p01-ch1sk1fk1fl1.tiff
B9_F2R3	B9	Plate 8	SET_Intron7_1	SET	1	29	2	1	50	3.4
B9_F2R3	B9	Plate 8	SDHA_Intron14_1	SDHA	1	56	2	2	50	1.8
B9_F3R1	B9	Plate 3	NUDT3_Intron1_2	NUDT3	24	29	53	1	45.3	82.8	NUDT3;PIK3R4	NUDT3_Intron1_2;PIK3R4_Intron9_1	2	Plate3_r02c09f01p01-ch1sk1fk1fl1.tiff
B9_F3R1	B9	Plate 3	PIK3R4_Intron9_1	PIK3R4	19	21	53	2	35.8	90.5	NUDT3;PIK3R4	NUDT3_Intron1_2;PIK3R4_Intron9_1	2	Plate3_r02c09f01p01-ch1sk1fk1fl1.tiff
B9_F3R1	B9	Plate 3	LARS2_Intron4_1	LARS2	1	98	53	3	1.9	1	NUDT3;PIK3R4	NUDT3_Intron1_2;PIK3R4_Intron9_1	2	Plate3_r02c09f01p01-ch1sk1fk1fl1.tiff
B9_F3R1	B9	Plate 3	NDUFS6_Intron2_1	NDUFS6	1	54	53	4	1.9	1.9	NUDT3;PIK3R4	NUDT3_Intron1_2;PIK3R4_Intron9_1	2	Plate3_r02c09f01p01-ch1sk1fk1fl1.tiff
B9_F3R1	B9	Plate 3	SMOX_Intron7_1	SMOX	1	57	53	>4	1.9	1.8	NUDT3;PIK3R4	NUDT3_Intron1_2;PIK3R4_Intron9_1	2	Plate3_r02c09f01p01-ch1sk1fk1fl1.tiff
B9_F3R1	B9	Plate 3	BLVRA_Intron2_1	BLVRA	1	24	53	>4	1.9	4.2	NUDT3;PIK3R4	NUDT3_Intron1_2;PIK3R4_Intron9_1	2	Plate3_r02c09f01p01-ch1sk1fk1fl1.tiff
B9_F3R1	B9	Plate 3	JMJD8_Intron8_1	JMJD8	1	43	53	>4	1.9	2.3	NUDT3;PIK3R4	NUDT3_Intron1_2;PIK3R4_Intron9_1	2	Plate3_r02c09f01p01-ch1sk1fk1fl1.tiff
B9_F3R1	B9	Plate 3	SNCA_Intron4_1	SNCA	1	25	53	>4	1.9	4	NUDT3;PIK3R4	NUDT3_Intron1_2;PIK3R4_Intron9_1	2	Plate3_r02c09f01p01-ch1sk1fk1fl1.tiff
B9_F3R1	B9	Plate 3	PKM_Intron3_1	PKM	1	72	53	>4	1.9	1.4	NUDT3;PIK3R4	NUDT3_Intron1_2;PIK3R4_Intron9_1	2	Plate3_r02c09f01p01-ch1sk1fk1fl1.tiff
B9_F3R1	B9	Plate 3	TPI1_Intron5_2	TPI1	1	11	53	>4	1.9	9.1	NUDT3;PIK3R4	NUDT3_Intron1_2;PIK3R4_Intron9_1	2	Plate3_r02c09f01p01-ch1sk1fk1fl1.tiff
B9_F3R1	B9	Plate 3	PLA2G16_Intron1_1	PLA2G16	1	15	53	>4	1.9	6.7	NUDT3;PIK3R4	NUDT3_Intron1_2;PIK3R4_Intron9_1	2	Plate3_r02c09f01p01-ch1sk1fk1fl1.tiff
B9_F3R1	B9	Plate 3	DR1_Intron3_3	DR1	1	88	53	>4	1.9	1.1	NUDT3;PIK3R4	NUDT3_Intron1_2;PIK3R4_Intron9_1	2	Plate3_r02c09f01p01-ch1sk1fk1fl1.tiff
B9_F3R2	B9	Plate 6	P4HB_Intron6_1	P4HB	30	103	35	1	85.7	29.1	P4HB	P4HB_Intron6_1	1	Plate6_r02c09f01p01-ch1sk1fk1fl1.tiff
B9_F3R2	B9	Plate 6	GMPS_Intron7_1	GMPS	1	51	35	2	2.9	2	P4HB	P4HB_Intron6_1	1	Plate6_r02c09f01p01-ch1sk1fk1fl1.tiff
B9_F3R2	B9	Plate 6	ALDH9A1_Intron6_1	ALDH9A1	1	101	35	3	2.9	1	P4HB	P4HB_Intron6_1	1	Plate6_r02c09f01p01-ch1sk1fk1fl1.tiff
B9_F3R2	B9	Plate 6	GLOD4_Intron9_1	GLOD4	1	31	35	4	2.9	3.2	P4HB	P4HB_Intron6_1	1	Plate6_r02c09f01p01-ch1sk1fk1fl1.tiff
B9_F3R2	B9	Plate 6	PKM_Intron3_1	PKM	1	72	35	>4	2.9	1.4	P4HB	P4HB_Intron6_1	1	Plate6_r02c09f01p01-ch1sk1fk1fl1.tiff
B9_F3R2	B9	Plate 6	SNW1_Intron12_1	SNW1	1	67	35	>4	2.9	1.5	P4HB	P4HB_Intron6_1	1	Plate6_r02c09f01p01-ch1sk1fk1fl1.tiff
B9_F3R3	B9	Plate 9	VPS4A_Intron9_1	VPS4A	3	17	5	1	60	17.6	VPS4A	VPS4A_Intron9_1	1
B9_F3R3	B9	Plate 9	ERI1_Intron1_1	ERI1	1	63	5	2	20	1.6	VPS4A	VPS4A_Intron9_1	1
B9_F3R3	B9	Plate 9	ACOT7_Intron2_2	ACOT7	1	115	5	3	20	0.9	VPS4A	VPS4A_Intron9_1	1
C1_F1R1	C1	Plate 1	KDM1A_Intron8_1	KDM1A	34	42	49	1	69.4	81	KDM1A	KDM1A_Intron8_1	1	Plate1_r03c01f01p01-ch1sk1fk1fl1.tiff
C1_F1R1	C1	Plate 1	DBI_Intron2_2	DBI	1	26	49	2	2	3.8	KDM1A	KDM1A_Intron8_1	1	Plate1_r03c01f01p01-ch1sk1fk1fl1.tiff
C1_F1R1	C1	Plate 1	RPA1_Intron8_1	RPA1	1	42	49	3	2	2.4	KDM1A	KDM1A_Intron8_1	1	Plate1_r03c01f01p01-ch1sk1fk1fl1.tiff
C1_F1R1	C1	Plate 1	NT5C3B_Intron1_1	NT5C3B	1	47	49	4	2	2.1	KDM1A	KDM1A_Intron8_1	1	Plate1_r03c01f01p01-ch1sk1fk1fl1.tiff
C1_F1R1	C1	Plate 1	GFI1_Intron5_1	GFI1	1	20	49	>4	2	5	KDM1A	KDM1A_Intron8_1	1	Plate1_r03c01f01p01-ch1sk1fk1fl1.tiff
C1_F1R1	C1	Plate 1	ASNS_Intron8_1	ASNS	1	31	49	>4	2	3.2	KDM1A	KDM1A_Intron8_1	1	Plate1_r03c01f01p01-ch1sk1fk1fl1.tiff
C1_F1R1	C1	Plate 1	PYGO2_Intron2_2	PYGO2	1	87	49	>4	2	1.1	KDM1A	KDM1A_Intron8_1	1	Plate1_r03c01f01p01-ch1sk1fk1fl1.tiff
C1_F1R1	C1	Plate 1	CA4_Intron5_1	CA4	1	33	49	>4	2	3	KDM1A	KDM1A_Intron8_1	1	Plate1_r03c01f01p01-ch1sk1fk1fl1.tiff
C1_F1R1	C1	Plate 1	SOD1_Intron4_2	SOD1	1	58	49	>4	2	1.7	KDM1A	KDM1A_Intron8_1	1	Plate1_r03c01f01p01-ch1sk1fk1fl1.tiff
C1_F1R1	C1	Plate 1	PPAT_Intron9_1	PPAT	1	78	49	>4	2	1.3	KDM1A	KDM1A_Intron8_1	1	Plate1_r03c01f01p01-ch1sk1fk1fl1.tiff
C1_F1R1	C1	Plate 1	APOO_Intron1_1	APOO	1	32	49	>4	2	3.1	KDM1A	KDM1A_Intron8_1	1	Plate1_r03c01f01p01-ch1sk1fk1fl1.tiff
C1_F1R1	C1	Plate 1	ACLY_Intron22_1	ACLY	1	140	49	>4	2	0.7	KDM1A	KDM1A_Intron8_1	1	Plate1_r03c01f01p01-ch1sk1fk1fl1.tiff
C1_F1R1	C1	Plate 1	MEN1_Intron8_1	MEN1	1	41	49	>4	2	2.4	KDM1A	KDM1A_Intron8_1	1	Plate1_r03c01f01p01-ch1sk1fk1fl1.tiff
C1_F1R1	C1	Plate 1	UQCRC2_Intron11_1	UQCRC2	1	86	49	>4	2	1.2	KDM1A	KDM1A_Intron8_1	1	Plate1_r03c01f01p01-ch1sk1fk1fl1.tiff
C1_F1R1	C1	Plate 1	MAT2B_Intron6_1	MAT2B	1	44	49	>4	2	2.3	KDM1A	KDM1A_Intron8_1	1	Plate1_r03c01f01p01-ch1sk1fk1fl1.tiff
C1_F1R1	C1	Plate 1	STAT5A_Intron14_1	STAT5A	1	25	49	>4	2	4	KDM1A	KDM1A_Intron8_1	1	Plate1_r03c01f01p01-ch1sk1fk1fl1.tiff
C1_F1R2	C1	Plate 4	GFI1_Intron5_1	GFI1	15	20	35	1	42.9	75	GFI1;ETFA	GFI1_Intron5_1;ETFA_Intron11_1	2	Plate4_r03c01f01p01-ch1sk1fk1fl1.tiff
C1_F1R2	C1	Plate 4	ETFA_Intron11_1	ETFA	15	25	35	2	42.9	60	GFI1;ETFA	GFI1_Intron5_1;ETFA_Intron11_1	2	Plate4_r03c01f01p01-ch1sk1fk1fl1.tiff
C1_F1R2	C1	Plate 4	GSR_Intron4_1	GSR	1	82	35	3	2.9	1.2	GFI1;ETFA	GFI1_Intron5_1;ETFA_Intron11_1	2	Plate4_r03c01f01p01-ch1sk1fk1fl1.tiff
C1_F1R2	C1	Plate 4	H2AFY_Intron4_2	H2AFY	1	31	35	4	2.9	3.2	GFI1;ETFA	GFI1_Intron5_1;ETFA_Intron11_1	2	Plate4_r03c01f01p01-ch1sk1fk1fl1.tiff
C1_F1R2	C1	Plate 4	MEAF6_Intron3_2	MEAF6	1	19	35	>4	2.9	5.3	GFI1;ETFA	GFI1_Intron5_1;ETFA_Intron11_1	2	Plate4_r03c01f01p01-ch1sk1fk1fl1.tiff
C1_F1R2	C1	Plate 4	NDUFA10_Intron7_1	NDUFA10	1	46	35	>4	2.9	2.2	GFI1;ETFA	GFI1_Intron5_1;ETFA_Intron11_1	2	Plate4_r03c01f01p01-ch1sk1fk1fl1.tiff
C1_F1R2	C1	Plate 4	UQCRB_Intron3_3	UQCRB	1	3	35	>4	2.9	33.3	GFI1;ETFA	GFI1_Intron5_1;ETFA_Intron11_1	2	Plate4_r03c01f01p01-ch1sk1fk1fl1.tiff
C1_F1R3	C1	Plate 7	AKR1C2_Intron5_1	AKR1C2	1	30	6	1	16.7	3.3				Plate7_r03c01f01p01-ch1sk1fk1fl1.tiff
C1_F1R3	C1	Plate 7	PDSS1_Intron1_1	PDSS1	1	22	6	2	16.7	4.5				Plate7_r03c01f01p01-ch1sk1fk1fl1.tiff
C1_F1R3	C1	Plate 7	GTF3C4_Intron1_1	GTF3C4	1	44	6	3	16.7	2.3				Plate7_r03c01f01p01-ch1sk1fk1fl1.tiff
C1_F1R3	C1	Plate 7	PSAT1_Intron1_2	PSAT1	1	52	6	4	16.7	1.9				Plate7_r03c01f01p01-ch1sk1fk1fl1.tiff
C1_F1R3	C1	Plate 7	IDH3A_Intron2_1	IDH3A	1	59	6	>4	16.7	1.7				Plate7_r03c01f01p01-ch1sk1fk1fl1.tiff
C1_F1R3	C1	Plate 7	GART_Intron5_1	GART	1	23	6	>4	16.7	4.3				Plate7_r03c01f01p01-ch1sk1fk1fl1.tiff
C1_F2R1	C1	Plate 2	NT5C3B_Intron1_1	NT5C3B	34	47	44	1	77.3	72.3	NT5C3B	NT5C3B_Intron1_1	1	Plate2_r03c01f01p01-ch1sk1fk1fl1.tiff
C1_F2R1	C1	Plate 2	TARS_Intron9_1	TARS	1	22	44	2	2.3	4.5	NT5C3B	NT5C3B_Intron1_1	1	Plate2_r03c01f01p01-ch1sk1fk1fl1.tiff
C1_F2R1	C1	Plate 2	TARS_Intron8_1	TARS	1	18	44	3	2.3	5.6	NT5C3B	NT5C3B_Intron1_1	1	Plate2_r03c01f01p01-ch1sk1fk1fl1.tiff
C1_F2R1	C1	Plate 2	BAZ1A_Intron7_1	BAZ1A	1	22	44	4	2.3	4.5	NT5C3B	NT5C3B_Intron1_1	1	Plate2_r03c01f01p01-ch1sk1fk1fl1.tiff
C1_F2R1	C1	Plate 2	SEPHS1_Intron6_1	SEPHS1	1	84	44	>4	2.3	1.2	NT5C3B	NT5C3B_Intron1_1	1	Plate2_r03c01f01p01-ch1sk1fk1fl1.tiff
C1_F2R1	C1	Plate 2	CA4_Intron5_1	CA4	1	33	44	>4	2.3	3	NT5C3B	NT5C3B_Intron1_1	1	Plate2_r03c01f01p01-ch1sk1fk1fl1.tiff
C1_F2R1	C1	Plate 2	RTF1_Intron2_1	RTF1	1	45	44	>4	2.3	2.2	NT5C3B	NT5C3B_Intron1_1	1	Plate2_r03c01f01p01-ch1sk1fk1fl1.tiff
C1_F2R1	C1	Plate 2	ACAT2_Intron3_2	ACAT2	1	25	44	>4	2.3	4	NT5C3B	NT5C3B_Intron1_1	1	Plate2_r03c01f01p01-ch1sk1fk1fl1.tiff
C1_F2R1	C1	Plate 2	MAOB_Intron4_1	MAOB	1	36	44	>4	2.3	2.8	NT5C3B	NT5C3B_Intron1_1	1	Plate2_r03c01f01p01-ch1sk1fk1fl1.tiff
C1_F2R1	C1	Plate 2	APOO_Intron1_1	APOO	1	32	44	>4	2.3	3.1	NT5C3B	NT5C3B_Intron1_1	1	Plate2_r03c01f01p01-ch1sk1fk1fl1.tiff
C1_F2R1	C1	Plate 2	MAT2B_Intron6_1	MAT2B	1	44	44	>4	2.3	2.3	NT5C3B	NT5C3B_Intron1_1	1	Plate2_r03c01f01p01-ch1sk1fk1fl1.tiff
C1_F2R2	C1	Plate 5	GAPDH_Intron3_2	GAPDH	27	71	30	1	90	38	GAPDH	GAPDH_Intron3_2	1	Plate5_r03c01f01p01-ch1sk1fk1fl1.tiff
C1_F2R2	C1	Plate 5	RPA1_Intron13_1	RPA1	1	28	30	2	3.3	3.6	GAPDH	GAPDH_Intron3_2	1	Plate5_r03c01f01p01-ch1sk1fk1fl1.tiff
C1_F2R2	C1	Plate 5	PPA1_Intron3_1	PPA1	1	27	30	3	3.3	3.7	GAPDH	GAPDH_Intron3_2	1	Plate5_r03c01f01p01-ch1sk1fk1fl1.tiff
C1_F2R2	C1	Plate 5	WARS2_Intron3_1	WARS2	1	16	30	4	3.3	6.3	GAPDH	GAPDH_Intron3_2	1	Plate5_r03c01f01p01-ch1sk1fk1fl1.tiff
C1_F2R3	C1	Plate 8	VPS4B_Intron1_1	VPS4B	36	84	46	1	78.3	42.9	VPS4B	VPS4B_Intron1_1	1	Plate8_r03c01f01p01-ch1sk1fk1fl1.tiff
C1_F2R3	C1	Plate 8	APEH_Intron10_1	APEH	3	7	46	2	6.5	42.9	VPS4B	VPS4B_Intron1_1	1	Plate8_r03c01f01p01-ch1sk1fk1fl1.tiff
C1_F2R3	C1	Plate 8	AFG3L2_Intron4_1	AFG3L2	2	58	46	3	4.3	3.4	VPS4B	VPS4B_Intron1_1	1	Plate8_r03c01f01p01-ch1sk1fk1fl1.tiff
C1_F2R3	C1	Plate 8	NT5C3B_Intron1_1	NT5C3B	1	47	46	4	2.2	2.1	VPS4B	VPS4B_Intron1_1	1	Plate8_r03c01f01p01-ch1sk1fk1fl1.tiff
C1_F2R3	C1	Plate 8	MAP3K12_Intron14_2	MAP3K12	1	27	46	>4	2.2	3.7	VPS4B	VPS4B_Intron1_1	1	Plate8_r03c01f01p01-ch1sk1fk1fl1.tiff
C1_F2R3	C1	Plate 8	TARS_Intron1_1	TARS	1	86	46	>4	2.2	1.2	VPS4B	VPS4B_Intron1_1	1	Plate8_r03c01f01p01-ch1sk1fk1fl1.tiff
C1_F2R3	C1	Plate 8	TXNDC5_Intron6_1	TXNDC5	1	32	46	>4	2.2	3.1	VPS4B	VPS4B_Intron1_1	1	Plate8_r03c01f01p01-ch1sk1fk1fl1.tiff
C1_F2R3	C1	Plate 8	PYGO2_Intron2_2	PYGO2	1	87	46	>4	2.2	1.1	VPS4B	VPS4B_Intron1_1	1	Plate8_r03c01f01p01-ch1sk1fk1fl1.tiff
C1_F3R1	C1	Plate 3	GSR_Intron2_1	GSR	23	27	39	1	59	85.2	GSR	GSR_Intron2_1	1	Plate3_r03c01f01p01-ch1sk1fk1fl1.tiff
C1_F3R1	C1	Plate 3	PYGO2_Intron2_2	PYGO2	2	87	39	2	5.1	2.3	GSR	GSR_Intron2_1	1	Plate3_r03c01f01p01-ch1sk1fk1fl1.tiff
C1_F3R1	C1	Plate 3	RLF_Intron7_1	RLF	2	43	39	3	5.1	4.7	GSR	GSR_Intron2_1	1	Plate3_r03c01f01p01-ch1sk1fk1fl1.tiff
C1_F3R1	C1	Plate 3	PDE9A_Intron16_1	PDE9A	2	42	39	4	5.1	4.8	GSR	GSR_Intron2_1	1	Plate3_r03c01f01p01-ch1sk1fk1fl1.tiff
C1_F3R1	C1	Plate 3	MBOAT1_Intron1_1	MBOAT1	1	2	39	>4	2.6	50	GSR	GSR_Intron2_1	1	Plate3_r03c01f01p01-ch1sk1fk1fl1.tiff
C1_F3R1	C1	Plate 3	WBP2_Intron7_1	WBP2	1	11	39	>4	2.6	9.1	GSR	GSR_Intron2_1	1	Plate3_r03c01f01p01-ch1sk1fk1fl1.tiff
C1_F3R1	C1	Plate 3	NAMPT_Intron3_1	NAMPT	1	98	39	>4	2.6	1	GSR	GSR_Intron2_1	1	Plate3_r03c01f01p01-ch1sk1fk1fl1.tiff
C1_F3R1	C1	Plate 3	SEPHS1_Intron6_1	SEPHS1	1	84	39	>4	2.6	1.2	GSR	GSR_Intron2_1	1	Plate3_r03c01f01p01-ch1sk1fk1fl1.tiff
C1_F3R1	C1	Plate 3	NXN_Intron7_1	NXN	1	85	39	>4	2.6	1.2	GSR	GSR_Intron2_1	1	Plate3_r03c01f01p01-ch1sk1fk1fl1.tiff
C1_F3R1	C1	Plate 3	ACLY_Intron7_1	ACLY	1	68	39	>4	2.6	1.5	GSR	GSR_Intron2_1	1	Plate3_r03c01f01p01-ch1sk1fk1fl1.tiff
C1_F3R1	C1	Plate 3	HTR3D_Intron3_3	HTR3D	1	13	39	>4	2.6	7.7	GSR	GSR_Intron2_1	1	Plate3_r03c01f01p01-ch1sk1fk1fl1.tiff
C1_F3R1	C1	Plate 3	MEN1_Intron8_1	MEN1	1	41	39	>4	2.6	2.4	GSR	GSR_Intron2_1	1	Plate3_r03c01f01p01-ch1sk1fk1fl1.tiff
C1_F3R1	C1	Plate 3	IDH1_Intron4_2	IDH1	1	104	39	>4	2.6	1	GSR	GSR_Intron2_1	1	Plate3_r03c01f01p01-ch1sk1fk1fl1.tiff
C1_F3R1	C1	Plate 3	IDE_Intron13_1	IDE	1	94	39	>4	2.6	1.1	GSR	GSR_Intron2_1	1	Plate3_r03c01f01p01-ch1sk1fk1fl1.tiff
C1_F3R2	C1	Plate 6	KDM3B_Intron6_1	KDM3B	27	32	33	1	81.8	84.4	KDM3B	KDM3B_Intron6_1	1	Plate6_r03c01f01p01-ch1sk1fk1fl1.tiff
C1_F3R2	C1	Plate 6	RRM2_Intron2_1	RRM2	1	33	33	2	3	3	KDM3B	KDM3B_Intron6_1	1	Plate6_r03c01f01p01-ch1sk1fk1fl1.tiff
C1_F3R2	C1	Plate 6	BCAT2_Intron2_1	BCAT2	1	39	33	3	3	2.6	KDM3B	KDM3B_Intron6_1	1	Plate6_r03c01f01p01-ch1sk1fk1fl1.tiff
C1_F3R2	C1	Plate 6	KARS_Intron6_1	KARS	1	30	33	4	3	3.3	KDM3B	KDM3B_Intron6_1	1	Plate6_r03c01f01p01-ch1sk1fk1fl1.tiff
C1_F3R2	C1	Plate 6	PPIF_Intron3_1	PPIF	1	52	33	>4	3	1.9	KDM3B	KDM3B_Intron6_1	1	Plate6_r03c01f01p01-ch1sk1fk1fl1.tiff
C1_F3R2	C1	Plate 6	CERS2_Intron3_1	CERS2	1	38	33	>4	3	2.6	KDM3B	KDM3B_Intron6_1	1	Plate6_r03c01f01p01-ch1sk1fk1fl1.tiff
C1_F3R2	C1	Plate 6	IDH1_Intron4_2	IDH1	1	104	33	>4	3	1	KDM3B	KDM3B_Intron6_1	1	Plate6_r03c01f01p01-ch1sk1fk1fl1.tiff
C1_F3R3	C1	Plate 9	GLOD4_Intron9_1	GLOD4	1	31	2	1	50	3.2
C1_F3R3	C1	Plate 9	CHST13_Intron2_1	CHST13	1	21	2	2	50	4.8
C10_F1R1	C10	Plate 1	PTEN_Intron8_1	PTEN	29	39	69	1	42	74.4	PTEN;NDUFA4	PTEN_Intron8_1;NDUFA4_Intron3_2	2	Plate1_r03c10f01p01-ch1sk1fk1fl1.tiff
C10_F1R1	C10	Plate 1	NDUFA4_Intron3_2	NDUFA4	24	34	69	2	34.8	70.6	PTEN;NDUFA4	PTEN_Intron8_1;NDUFA4_Intron3_2	2	Plate1_r03c10f01p01-ch1sk1fk1fl1.tiff
C10_F1R1	C10	Plate 1	PHGDH_Intron10_1	PHGDH	2	32	69	3	2.9	6.3	PTEN;NDUFA4	PTEN_Intron8_1;NDUFA4_Intron3_2	2	Plate1_r03c10f01p01-ch1sk1fk1fl1.tiff
C10_F1R1	C10	Plate 1	HSD17B4_Intron13_1	HSD17B4	1	53	69	4	1.4	1.9	PTEN;NDUFA4	PTEN_Intron8_1;NDUFA4_Intron3_2	2	Plate1_r03c10f01p01-ch1sk1fk1fl1.tiff
C10_F1R1	C10	Plate 1	DARS2_Intron9_1	DARS2	1	80	69	>4	1.4	1.3	PTEN;NDUFA4	PTEN_Intron8_1;NDUFA4_Intron3_2	2	Plate1_r03c10f01p01-ch1sk1fk1fl1.tiff
C10_F1R1	C10	Plate 1	RPA1_Intron8_1	RPA1	1	42	69	>4	1.4	2.4	PTEN;NDUFA4	PTEN_Intron8_1;NDUFA4_Intron3_2	2	Plate1_r03c10f01p01-ch1sk1fk1fl1.tiff
C10_F1R1	C10	Plate 1	PRPS1_Intron2_1	PRPS1	1	36	69	>4	1.4	2.8	PTEN;NDUFA4	PTEN_Intron8_1;NDUFA4_Intron3_2	2	Plate1_r03c10f01p01-ch1sk1fk1fl1.tiff
C10_F1R1	C10	Plate 1	GATAD2A_Intron7_1	GATAD2A	1	58	69	>4	1.4	1.7	PTEN;NDUFA4	PTEN_Intron8_1;NDUFA4_Intron3_2	2	Plate1_r03c10f01p01-ch1sk1fk1fl1.tiff
C10_F1R1	C10	Plate 1	COX15_Intron1_1	COX15	1	14	69	>4	1.4	7.1	PTEN;NDUFA4	PTEN_Intron8_1;NDUFA4_Intron3_2	2	Plate1_r03c10f01p01-ch1sk1fk1fl1.tiff
C10_F1R1	C10	Plate 1	PGD_Intron9_1	PGD	1	38	69	>4	1.4	2.6	PTEN;NDUFA4	PTEN_Intron8_1;NDUFA4_Intron3_2	2	Plate1_r03c10f01p01-ch1sk1fk1fl1.tiff
C10_F1R1	C10	Plate 1	CYP7A1_Intron2_2	CYP7A1	1	82	69	>4	1.4	1.2	PTEN;NDUFA4	PTEN_Intron8_1;NDUFA4_Intron3_2	2	Plate1_r03c10f01p01-ch1sk1fk1fl1.tiff
C10_F1R1	C10	Plate 1	SORD_Intron1_2	SORD	1	38	69	>4	1.4	2.6	PTEN;NDUFA4	PTEN_Intron8_1;NDUFA4_Intron3_2	2	Plate1_r03c10f01p01-ch1sk1fk1fl1.tiff
C10_F1R1	C10	Plate 1	ATAD3A_Intron4_1	ATAD3A	1	185	69	>4	1.4	0.5	PTEN;NDUFA4	PTEN_Intron8_1;NDUFA4_Intron3_2	2	Plate1_r03c10f01p01-ch1sk1fk1fl1.tiff
C10_F1R1	C10	Plate 1	RTF1_Intron2_1	RTF1	1	45	69	>4	1.4	2.2	PTEN;NDUFA4	PTEN_Intron8_1;NDUFA4_Intron3_2	2	Plate1_r03c10f01p01-ch1sk1fk1fl1.tiff
C10_F1R1	C10	Plate 1	CUL4B_Intron20_1	CUL4B	1	94	69	>4	1.4	1.1	PTEN;NDUFA4	PTEN_Intron8_1;NDUFA4_Intron3_2	2	Plate1_r03c10f01p01-ch1sk1fk1fl1.tiff
C10_F1R1	C10	Plate 1	MEN1_Intron8_1	MEN1	1	41	69	>4	1.4	2.4	PTEN;NDUFA4	PTEN_Intron8_1;NDUFA4_Intron3_2	2	Plate1_r03c10f01p01-ch1sk1fk1fl1.tiff
C10_F1R1	C10	Plate 1	COQ10A_Intron3_1	COQ10A	1	50	69	>4	1.4	2	PTEN;NDUFA4	PTEN_Intron8_1;NDUFA4_Intron3_2	2	Plate1_r03c10f01p01-ch1sk1fk1fl1.tiff
C10_F1R2	C10	Plate 4	MEAF6_Intron3_2	MEAF6	2	19	5	1	40	10.5				Plate4_r03c10f01p01-ch1sk1fk1fl1.tiff
C10_F1R2	C10	Plate 4	GSR_Intron4_1	GSR	1	82	5	2	20	1.2				Plate4_r03c10f01p01-ch1sk1fk1fl1.tiff
C10_F1R2	C10	Plate 4	PDHA1_Intron3_1	PDHA1	1	51	5	3	20	2				Plate4_r03c10f01p01-ch1sk1fk1fl1.tiff
C10_F1R2	C10	Plate 4	ETFA_Intron11_1	ETFA	1	25	5	4	20	4				Plate4_r03c10f01p01-ch1sk1fk1fl1.tiff
C10_F1R3	C10	Plate 7	GATAD2A_Intron7_1	GATAD2A	25	58	34	1	73.5	43.1	GATAD2A	GATAD2A_Intron7_1	1	Plate7_r03c10f01p01-ch1sk1fk1fl1.tiff
C10_F1R3	C10	Plate 7	ACLY_Intron22_1	ACLY	2	140	34	2	5.9	1.4	GATAD2A	GATAD2A_Intron7_1	1	Plate7_r03c10f01p01-ch1sk1fk1fl1.tiff
C10_F1R3	C10	Plate 7	PLOD3_Intron8_1	PLOD3	2	90	34	3	5.9	2.2	GATAD2A	GATAD2A_Intron7_1	1	Plate7_r03c10f01p01-ch1sk1fk1fl1.tiff
C10_F1R3	C10	Plate 7	DARS2_Intron9_1	DARS2	1	80	34	4	2.9	1.3	GATAD2A	GATAD2A_Intron7_1	1	Plate7_r03c10f01p01-ch1sk1fk1fl1.tiff
C10_F1R3	C10	Plate 7	DNMT1_Intron21_1	DNMT1	1	17	34	>4	2.9	5.9	GATAD2A	GATAD2A_Intron7_1	1	Plate7_r03c10f01p01-ch1sk1fk1fl1.tiff
C10_F1R3	C10	Plate 7	PDHA1_Intron3_1	PDHA1	1	51	34	>4	2.9	2	GATAD2A	GATAD2A_Intron7_1	1	Plate7_r03c10f01p01-ch1sk1fk1fl1.tiff
C10_F1R3	C10	Plate 7	PPA2_Intron3_1	PPA2	1	92	34	>4	2.9	1.1	GATAD2A	GATAD2A_Intron7_1	1	Plate7_r03c10f01p01-ch1sk1fk1fl1.tiff
C10_F1R3	C10	Plate 7	PDSS1_Intron1_1	PDSS1	1	22	34	>4	2.9	4.5	GATAD2A	GATAD2A_Intron7_1	1	Plate7_r03c10f01p01-ch1sk1fk1fl1.tiff
C10_F2R1	C10	Plate 2	NXN_Intron3_1	NXN	3	51	17	1	17.6	5.9				Plate2_r03c10f01p01-ch1sk1fk1fl1.tiff
C10_F2R1	C10	Plate 2	CYP7A1_Intron2_2	CYP7A1	2	82	17	2	11.8	2.4				Plate2_r03c10f01p01-ch1sk1fk1fl1.tiff
C10_F2R1	C10	Plate 2	MTR_Intron2_1	MTR	1	13	17	3	5.9	7.7				Plate2_r03c10f01p01-ch1sk1fk1fl1.tiff
C10_F2R1	C10	Plate 2	ASXL1_Intron1_1	ASXL1	1	75	17	4	5.9	1.3				Plate2_r03c10f01p01-ch1sk1fk1fl1.tiff
C10_F2R1	C10	Plate 2	PRPS1_Intron2_1	PRPS1	1	36	17	>4	5.9	2.8				Plate2_r03c10f01p01-ch1sk1fk1fl1.tiff
C10_F2R1	C10	Plate 2	DPF2_Intron5_2	DPF2	1	15	17	>4	5.9	6.7				Plate2_r03c10f01p01-ch1sk1fk1fl1.tiff
C10_F2R1	C10	Plate 2	MAGT1_Intron6_1	MAGT1	1	57	17	>4	5.9	1.8				Plate2_r03c10f01p01-ch1sk1fk1fl1.tiff
C10_F2R1	C10	Plate 2	PTEN_Intron8_1	PTEN	1	39	17	>4	5.9	2.6				Plate2_r03c10f01p01-ch1sk1fk1fl1.tiff
C10_F2R1	C10	Plate 2	ATAD3A_Intron4_1	ATAD3A	1	185	17	>4	5.9	0.5				Plate2_r03c10f01p01-ch1sk1fk1fl1.tiff
C10_F2R1	C10	Plate 2	HDAC10_Intron10_1	HDAC10	1	16	17	>4	5.9	6.3				Plate2_r03c10f01p01-ch1sk1fk1fl1.tiff
C10_F2R1	C10	Plate 2	SUCLA2_Intron5_1	SUCLA2	1	66	17	>4	5.9	1.5				Plate2_r03c10f01p01-ch1sk1fk1fl1.tiff
C10_F2R1	C10	Plate 2	PLCB1_Intron2_1	PLCB1	1	42	17	>4	5.9	2.4				Plate2_r03c10f01p01-ch1sk1fk1fl1.tiff
C10_F2R1	C10	Plate 2	IDE_Intron13_1	IDE	1	94	17	>4	5.9	1.1				Plate2_r03c10f01p01-ch1sk1fk1fl1.tiff
C10_F2R1	C10	Plate 2	COQ10A_Intron3_1	COQ10A	1	50	17	>4	5.9	2				Plate2_r03c10f01p01-ch1sk1fk1fl1.tiff
C10_F2R2	C10	Plate 5	EHMT1_Intron25_1	EHMT1	21	34	27	1	77.8	61.8	EHMT1	EHMT1_Intron25_1	1	Plate5_r03c10f01p01-ch1sk1fk1fl1.tiff
C10_F2R2	C10	Plate 5	RRM2_Intron2_1	RRM2	1	33	27	2	3.7	3	EHMT1	EHMT1_Intron25_1	1	Plate5_r03c10f01p01-ch1sk1fk1fl1.tiff
C10_F2R2	C10	Plate 5	FKBP15_Intron9_1	FKBP15	1	6	27	3	3.7	16.7	EHMT1	EHMT1_Intron25_1	1	Plate5_r03c10f01p01-ch1sk1fk1fl1.tiff
C10_F2R2	C10	Plate 5	CYC1_Intron1_1	CYC1	1	71	27	4	3.7	1.4	EHMT1	EHMT1_Intron25_1	1	Plate5_r03c10f01p01-ch1sk1fk1fl1.tiff
C10_F2R2	C10	Plate 5	CS_Intron6_1	CS	1	190	27	>4	3.7	0.5	EHMT1	EHMT1_Intron25_1	1	Plate5_r03c10f01p01-ch1sk1fk1fl1.tiff
C10_F2R2	C10	Plate 5	GARS_Intron1_1	GARS	1	62	27	>4	3.7	1.6	EHMT1	EHMT1_Intron25_1	1	Plate5_r03c10f01p01-ch1sk1fk1fl1.tiff
C10_F2R2	C10	Plate 5	PRMT3_Intron14_1	PRMT3	1	25	27	>4	3.7	4	EHMT1	EHMT1_Intron25_1	1	Plate5_r03c10f01p01-ch1sk1fk1fl1.tiff
C10_F2R3	C10	Plate 8	DHCR24_Intron6_1	DHCR24	1	45	2	1	50	2.2
C10_F2R3	C10	Plate 8	GCKR_Intron15_1	GCKR	1	27	2	2	50	3.7
C10_F3R1	C10	Plate 3	SMOX_Intron7_1	SMOX	5	57	12	1	41.7	8.8				Plate3_r03c10f01p01-ch1sk1fk1fl1.tiff
C10_F3R1	C10	Plate 3	NDUFV2_Intron2_1	NDUFV2	2	36	12	2	16.7	5.6				Plate3_r03c10f01p01-ch1sk1fk1fl1.tiff
C10_F3R1	C10	Plate 3	NT5C3B_Intron1_1	NT5C3B	1	47	12	3	8.3	2.1				Plate3_r03c10f01p01-ch1sk1fk1fl1.tiff
C10_F3R1	C10	Plate 3	AURKA_Intron3_1	AURKA	1	38	12	4	8.3	2.6				Plate3_r03c10f01p01-ch1sk1fk1fl1.tiff
C10_F3R1	C10	Plate 3	OAT_Intron6_1	OAT	1	121	12	>4	8.3	0.8				Plate3_r03c10f01p01-ch1sk1fk1fl1.tiff
C10_F3R1	C10	Plate 3	CA4_Intron5_1	CA4	1	33	12	>4	8.3	3				Plate3_r03c10f01p01-ch1sk1fk1fl1.tiff
C10_F3R1	C10	Plate 3	MEN1_Intron8_1	MEN1	1	41	12	>4	8.3	2.4				Plate3_r03c10f01p01-ch1sk1fk1fl1.tiff
C10_F3R2	C10	Plate 6	BAZ1B_Intron5_1	BAZ1B	15	18	24	1	62.5	83.3	BAZ1B	BAZ1B_Intron5_1	1	Plate6_r03c10f01p01-ch1sk1fk1fl1.tiff
C10_F3R2	C10	Plate 6	PUS7_Intron11_2	PUS7	4	9	24	2	16.7	44.4	BAZ1B	BAZ1B_Intron5_1	1	Plate6_r03c10f01p01-ch1sk1fk1fl1.tiff
C10_F3R2	C10	Plate 6	ASXL1_Intron1_1	ASXL1	1	75	24	3	4.2	1.3	BAZ1B	BAZ1B_Intron5_1	1	Plate6_r03c10f01p01-ch1sk1fk1fl1.tiff
C10_F3R2	C10	Plate 6	MEAF6_Intron3_2	MEAF6	1	19	24	4	4.2	5.3	BAZ1B	BAZ1B_Intron5_1	1	Plate6_r03c10f01p01-ch1sk1fk1fl1.tiff
C10_F3R2	C10	Plate 6	NDUFA10_Intron7_1	NDUFA10	1	46	24	>4	4.2	2.2	BAZ1B	BAZ1B_Intron5_1	1	Plate6_r03c10f01p01-ch1sk1fk1fl1.tiff
C10_F3R2	C10	Plate 6	PNPO_Intron1_2	PNPO	1	52	24	>4	4.2	1.9	BAZ1B	BAZ1B_Intron5_1	1	Plate6_r03c10f01p01-ch1sk1fk1fl1.tiff
C10_F3R2	C10	Plate 6	CARS2_Intron9_1	CARS2	1	53	24	>4	4.2	1.9	BAZ1B	BAZ1B_Intron5_1	1	Plate6_r03c10f01p01-ch1sk1fk1fl1.tiff
C10_F3R3	C10	Plate 9	IDH3A_Intron2_1	IDH3A	1	59	1	1	100	1.7
C11_F1R1	C11	Plate 1	HDAC10_Intron10_1	HDAC10	8	16	21	1	38.1	50				Plate1_r03c11f01p01-ch1sk1fk1fl1.tiff
C11_F1R1	C11	Plate 1	GARS_Intron1_1	GARS	2	62	21	2	9.5	3.2				Plate1_r03c11f01p01-ch1sk1fk1fl1.tiff
C11_F1R1	C11	Plate 1	TADA3_Intron6_1	TADA3	1	44	21	3	4.8	2.3				Plate1_r03c11f01p01-ch1sk1fk1fl1.tiff
C11_F1R1	C11	Plate 1	MTR_Intron2_1	MTR	1	13	21	4	4.8	7.7				Plate1_r03c11f01p01-ch1sk1fk1fl1.tiff
C11_F1R1	C11	Plate 1	ASNS_Intron8_1	ASNS	1	31	21	>4	4.8	3.2				Plate1_r03c11f01p01-ch1sk1fk1fl1.tiff
C11_F1R1	C11	Plate 1	NAMPT_Intron3_1	NAMPT	1	98	21	>4	4.8	1				Plate1_r03c11f01p01-ch1sk1fk1fl1.tiff
C11_F1R1	C11	Plate 1	HSD17B10_Intron4_1	HSD17B10	1	73	21	>4	4.8	1.4				Plate1_r03c11f01p01-ch1sk1fk1fl1.tiff
C11_F1R1	C11	Plate 1	AQP1_Intron2_1	AQP1	1	30	21	>4	4.8	3.3				Plate1_r03c11f01p01-ch1sk1fk1fl1.tiff
C11_F1R1	C11	Plate 1	ATAD3A_Intron4_1	ATAD3A	1	185	21	>4	4.8	0.5				Plate1_r03c11f01p01-ch1sk1fk1fl1.tiff
C11_F1R1	C11	Plate 1	ECHS1_Intron7_2	ECHS1	1	27	21	>4	4.8	3.7				Plate1_r03c11f01p01-ch1sk1fk1fl1.tiff
C11_F1R1	C11	Plate 1	ACLY_Intron7_1	ACLY	1	68	21	>4	4.8	1.5				Plate1_r03c11f01p01-ch1sk1fk1fl1.tiff
C11_F1R1	C11	Plate 1	CUL4B_Intron20_1	CUL4B	1	94	21	>4	4.8	1.1				Plate1_r03c11f01p01-ch1sk1fk1fl1.tiff
C11_F1R1	C11	Plate 1	PLCB1_Intron2_1	PLCB1	1	42	21	>4	4.8	2.4				Plate1_r03c11f01p01-ch1sk1fk1fl1.tiff
C11_F1R2	C11	Plate 4	GARS_Intron1_1	GARS	14	62	25	1	56	22.6	GARS	GARS_Intron1_1	1	Plate4_r03c11f01p01-ch1sk1fk1fl1.tiff
C11_F1R2	C11	Plate 4	RRM2_Intron2_1	RRM2	1	33	25	2	4	3	GARS	GARS_Intron1_1	1	Plate4_r03c11f01p01-ch1sk1fk1fl1.tiff
C11_F1R2	C11	Plate 4	MEAF6_Intron3_2	MEAF6	1	19	25	3	4	5.3	GARS	GARS_Intron1_1	1	Plate4_r03c11f01p01-ch1sk1fk1fl1.tiff
C11_F1R2	C11	Plate 4	PPA2_Intron3_1	PPA2	1	92	25	4	4	1.1	GARS	GARS_Intron1_1	1	Plate4_r03c11f01p01-ch1sk1fk1fl1.tiff
C11_F1R2	C11	Plate 4	NAMPT_Intron3_1	NAMPT	1	98	25	>4	4	1	GARS	GARS_Intron1_1	1	Plate4_r03c11f01p01-ch1sk1fk1fl1.tiff
C11_F1R2	C11	Plate 4	AQP1_Intron2_1	AQP1	1	30	25	>4	4	3.3	GARS	GARS_Intron1_1	1	Plate4_r03c11f01p01-ch1sk1fk1fl1.tiff
C11_F1R2	C11	Plate 4	AGL_Intron26_1	AGL	1	32	25	>4	4	3.1	GARS	GARS_Intron1_1	1	Plate4_r03c11f01p01-ch1sk1fk1fl1.tiff
C11_F1R2	C11	Plate 4	UPP1_Intron5_2	UPP1	1	26	25	>4	4	3.8	GARS	GARS_Intron1_1	1	Plate4_r03c11f01p01-ch1sk1fk1fl1.tiff
C11_F1R2	C11	Plate 4	OXA1L_Intron1_1	OXA1L	1	74	25	>4	4	1.4	GARS	GARS_Intron1_1	1	Plate4_r03c11f01p01-ch1sk1fk1fl1.tiff
C11_F1R2	C11	Plate 4	FMR1_Intron12_1	FMR1	1	112	25	>4	4	0.9	GARS	GARS_Intron1_1	1	Plate4_r03c11f01p01-ch1sk1fk1fl1.tiff
C11_F1R2	C11	Plate 4	TAF9B_Intron1_2	TAF9B	1	87	25	>4	4	1.1	GARS	GARS_Intron1_1	1	Plate4_r03c11f01p01-ch1sk1fk1fl1.tiff
C11_F1R2	C11	Plate 4	PPIF_Intron3_1	PPIF	1	52	25	>4	4	1.9	GARS	GARS_Intron1_1	1	Plate4_r03c11f01p01-ch1sk1fk1fl1.tiff
C11_F1R3	C11	Plate 7	SUCLA2_Intron5_1	SUCLA2	6	66	20	1	30	9.1				Plate7_r03c11f01p01-ch1sk1fk1fl1.tiff
C11_F1R3	C11	Plate 7	TXNDC9_Intron2_1	TXNDC9	3	32	20	2	15	9.4				Plate7_r03c11f01p01-ch1sk1fk1fl1.tiff
C11_F1R3	C11	Plate 7	SV2B_Intron5_1	SV2B	2	30	20	3	10	6.7				Plate7_r03c11f01p01-ch1sk1fk1fl1.tiff
C11_F1R3	C11	Plate 7	UNG_Intron1_1	UNG	1	8	20	4	5	12.5				Plate7_r03c11f01p01-ch1sk1fk1fl1.tiff
C11_F1R3	C11	Plate 7	TRMT6_Intron7_1	TRMT6	1	23	20	>4	5	4.3				Plate7_r03c11f01p01-ch1sk1fk1fl1.tiff
C11_F1R3	C11	Plate 7	ALG3_Intron5_2	ALG3	1	27	20	>4	5	3.7				Plate7_r03c11f01p01-ch1sk1fk1fl1.tiff
C11_F1R3	C11	Plate 7	PDSS1_Intron1_1	PDSS1	1	22	20	>4	5	4.5				Plate7_r03c11f01p01-ch1sk1fk1fl1.tiff
C11_F1R3	C11	Plate 7	GUSB_Intron1_1	GUSB	1	28	20	>4	5	3.6				Plate7_r03c11f01p01-ch1sk1fk1fl1.tiff
C11_F1R3	C11	Plate 7	MTHFD1_Intron26_2	MTHFD1	1	38	20	>4	5	2.6				Plate7_r03c11f01p01-ch1sk1fk1fl1.tiff
C11_F1R3	C11	Plate 7	NUDT9_Intron5_1	NUDT9	1	3	20	>4	5	33.3				Plate7_r03c11f01p01-ch1sk1fk1fl1.tiff
C11_F1R3	C11	Plate 7	FMR1_Intron12_1	FMR1	1	112	20	>4	5	0.9				Plate7_r03c11f01p01-ch1sk1fk1fl1.tiff
C11_F1R3	C11	Plate 7	GARS_Intron1_1	GARS	1	62	20	>4	5	1.6				Plate7_r03c11f01p01-ch1sk1fk1fl1.tiff
C11_F2R1	C11	Plate 2	SUCLA2_Intron5_1	SUCLA2	13	66	19	1	68.4	19.7	SUCLA2	SUCLA2_Intron5_1	1	Plate2_r03c11f01p01-ch1sk1fk1fl1.tiff
C11_F2R1	C11	Plate 2	RCOR1_Intron4_1	RCOR1	2	22	19	2	10.5	9.1	SUCLA2	SUCLA2_Intron5_1	1	Plate2_r03c11f01p01-ch1sk1fk1fl1.tiff
C11_F2R1	C11	Plate 2	PARK7_Intron3_1	PARK7	2	8	19	3	10.5	25	SUCLA2	SUCLA2_Intron5_1	1	Plate2_r03c11f01p01-ch1sk1fk1fl1.tiff
C11_F2R1	C11	Plate 2	PRPS1_Intron2_1	PRPS1	1	36	19	4	5.3	2.8	SUCLA2	SUCLA2_Intron5_1	1	Plate2_r03c11f01p01-ch1sk1fk1fl1.tiff
C11_F2R1	C11	Plate 2	VAT1_Intron1_2	VAT1	1	10	19	>4	5.3	10	SUCLA2	SUCLA2_Intron5_1	1	Plate2_r03c11f01p01-ch1sk1fk1fl1.tiff
C11_F2R2	C11	Plate 5	ELOVL4_Intron5_1	ELOVL4	4	6	8	1	50	66.7				Plate5_r03c11f01p01-ch1sk1fk1fl1.tiff
C11_F2R2	C11	Plate 5	FKBP15_Intron9_1	FKBP15	2	6	8	2	25	33.3				Plate5_r03c11f01p01-ch1sk1fk1fl1.tiff
C11_F2R2	C11	Plate 5	GSS_Intron2_1	GSS	1	47	8	3	12.5	2.1				Plate5_r03c11f01p01-ch1sk1fk1fl1.tiff
C11_F2R2	C11	Plate 5	RTF1_Intron2_1	RTF1	1	45	8	4	12.5	2.2				Plate5_r03c11f01p01-ch1sk1fk1fl1.tiff
C11_F2R3	C11	Plate 8	NAMPT_Intron3_1	NAMPT	1	98	1	1	100	1
C11_F3R1	C11	Plate 3	MEN1_Intron8_1	MEN1	9	41	15	1	60	22	MEN1	MEN1_Intron8_1	1	Plate3_r03c11f01p01-ch1sk1fk1fl1.tiff
C11_F3R1	C11	Plate 3	NT5C3B_Intron1_1	NT5C3B	1	47	15	2	6.7	2.1	MEN1	MEN1_Intron8_1	1	Plate3_r03c11f01p01-ch1sk1fk1fl1.tiff
C11_F3R1	C11	Plate 3	CYB561_Intron4_2	CYB561	1	24	15	3	6.7	4.2	MEN1	MEN1_Intron8_1	1	Plate3_r03c11f01p01-ch1sk1fk1fl1.tiff
C11_F3R1	C11	Plate 3	KDM1A_Intron8_1	KDM1A	1	42	15	4	6.7	2.4	MEN1	MEN1_Intron8_1	1	Plate3_r03c11f01p01-ch1sk1fk1fl1.tiff
C11_F3R1	C11	Plate 3	RTN4IP1_Intron3_1	RTN4IP1	1	20	15	>4	6.7	5	MEN1	MEN1_Intron8_1	1	Plate3_r03c11f01p01-ch1sk1fk1fl1.tiff
C11_F3R1	C11	Plate 3	HIBCH_Intron2_1	HIBCH	1	22	15	>4	6.7	4.5	MEN1	MEN1_Intron8_1	1	Plate3_r03c11f01p01-ch1sk1fk1fl1.tiff
C11_F3R1	C11	Plate 3	QARS_Intron18_1	QARS	1	79	15	>4	6.7	1.3	MEN1	MEN1_Intron8_1	1	Plate3_r03c11f01p01-ch1sk1fk1fl1.tiff
C11_F3R2	C11	Plate 6	UPP1_Intron5_2	UPP1	20	26	24	1	83.3	76.9	UPP1	UPP1_Intron5_2	1	Plate6_r03c11f01p01-ch1sk1fk1fl1.tiff
C11_F3R2	C11	Plate 6	GCLM_Intron2_2	GCLM	1	41	24	2	4.2	2.4	UPP1	UPP1_Intron5_2	1	Plate6_r03c11f01p01-ch1sk1fk1fl1.tiff
C11_F3R2	C11	Plate 6	MMADHC_Intron2_1	MMADHC	1	66	24	3	4.2	1.5	UPP1	UPP1_Intron5_2	1	Plate6_r03c11f01p01-ch1sk1fk1fl1.tiff
C11_F3R2	C11	Plate 6	NDUFS3_Intron6_1	NDUFS3	1	15	24	4	4.2	6.7	UPP1	UPP1_Intron5_2	1	Plate6_r03c11f01p01-ch1sk1fk1fl1.tiff
C11_F3R2	C11	Plate 6	NDUFA10_Intron7_1	NDUFA10	1	46	24	>4	4.2	2.2	UPP1	UPP1_Intron5_2	1	Plate6_r03c11f01p01-ch1sk1fk1fl1.tiff
C11_F3R3	C11	Plate 9	ACLY_Intron22_1	ACLY	2	140	6	1	33.3	1.4
C11_F3R3	C11	Plate 9	PGAM1_Intron2_1	PGAM1	1	12	6	2	16.7	8.3
C11_F3R3	C11	Plate 9	GTF3C4_Intron1_1	GTF3C4	1	44	6	3	16.7	2.3
C11_F3R3	C11	Plate 9	PLOD3_Intron8_1	PLOD3	1	90	6	4	16.7	1.1
C11_F3R3	C11	Plate 9	NAT10_Intron7_1	NAT10	1	27	6	>4	16.7	3.7
C12_F1R1	C12	Plate 1	COQ10A_Intron3_1	COQ10A	37	50	40	1	92.5	74	COQ10A	COQ10A_Intron3_1	1	Plate1_r03c12f01p01-ch1sk1fk1fl1.tiff
C12_F1R1	C12	Plate 1	MORF4L1_Intron9_1	MORF4L1	1	39	40	2	2.5	2.6	COQ10A	COQ10A_Intron3_1	1	Plate1_r03c12f01p01-ch1sk1fk1fl1.tiff
C12_F1R1	C12	Plate 1	QARS_Intron3_1	QARS	1	36	40	3	2.5	2.8	COQ10A	COQ10A_Intron3_1	1	Plate1_r03c12f01p01-ch1sk1fk1fl1.tiff
C12_F1R1	C12	Plate 1	SUCLA2_Intron5_1	SUCLA2	1	66	40	4	2.5	1.5	COQ10A	COQ10A_Intron3_1	1	Plate1_r03c12f01p01-ch1sk1fk1fl1.tiff
C12_F1R2	C12	Plate 4	BCL6_Intron8_2	BCL6	5	8	9	1	55.6	62.5	BCL6	BCL6_Intron8_2	1	Plate4_r03c12f01p01-ch1sk1fk1fl1.tiff
C12_F1R2	C12	Plate 4	FUBP3_Intron13_1	FUBP3	1	66	9	2	11.1	1.5	BCL6	BCL6_Intron8_2	1	Plate4_r03c12f01p01-ch1sk1fk1fl1.tiff
C12_F1R2	C12	Plate 4	GOT2_Intron9_1	GOT2	1	20	9	3	11.1	5	BCL6	BCL6_Intron8_2	1	Plate4_r03c12f01p01-ch1sk1fk1fl1.tiff
C12_F1R2	C12	Plate 4	GAPDH_Intron3_2	GAPDH	1	71	9	4	11.1	1.4	BCL6	BCL6_Intron8_2	1	Plate4_r03c12f01p01-ch1sk1fk1fl1.tiff
C12_F1R2	C12	Plate 4	GARS_Intron1_1	GARS	1	62	9	>4	11.1	1.6	BCL6	BCL6_Intron8_2	1	Plate4_r03c12f01p01-ch1sk1fk1fl1.tiff
C12_F1R3	C12	Plate 7	PDSS1_Intron1_1	PDSS1	17	22	20	1	85	77.3	PDSS1	PDSS1_Intron1_1	1	Plate7_r03c12f01p01-ch1sk1fk1fl1.tiff
C12_F1R3	C12	Plate 7	PYGL_Intron4_1	PYGL	2	121	20	2	10	1.7	PDSS1	PDSS1_Intron1_1	1	Plate7_r03c12f01p01-ch1sk1fk1fl1.tiff
C12_F1R3	C12	Plate 7	PLOD3_Intron8_1	PLOD3	1	90	20	3	5	1.1	PDSS1	PDSS1_Intron1_1	1	Plate7_r03c12f01p01-ch1sk1fk1fl1.tiff
C12_F2R1	C12	Plate 2	APOO_Intron1_1	APOO	8	32	14	1	57.1	25	APOO	APOO_Intron1_1	1	Plate2_r03c12f01p01-ch1sk1fk1fl1.tiff
C12_F2R1	C12	Plate 2	DHCR24_Intron6_1	DHCR24	1	45	14	2	7.1	2.2	APOO	APOO_Intron1_1	1	Plate2_r03c12f01p01-ch1sk1fk1fl1.tiff
C12_F2R1	C12	Plate 2	AASS_Intron8_1	AASS	1	33	14	3	7.1	3	APOO	APOO_Intron1_1	1	Plate2_r03c12f01p01-ch1sk1fk1fl1.tiff
C12_F2R1	C12	Plate 2	FH_Intron5_1	FH	1	20	14	4	7.1	5	APOO	APOO_Intron1_1	1	Plate2_r03c12f01p01-ch1sk1fk1fl1.tiff
C12_F2R1	C12	Plate 2	OAT_Intron6_1	OAT	1	121	14	>4	7.1	0.8	APOO	APOO_Intron1_1	1	Plate2_r03c12f01p01-ch1sk1fk1fl1.tiff
C12_F2R1	C12	Plate 2	TARS_Intron1_1	TARS	1	86	14	>4	7.1	1.2	APOO	APOO_Intron1_1	1	Plate2_r03c12f01p01-ch1sk1fk1fl1.tiff
C12_F2R1	C12	Plate 2	IDH1_Intron4_2	IDH1	1	104	14	>4	7.1	1	APOO	APOO_Intron1_1	1	Plate2_r03c12f01p01-ch1sk1fk1fl1.tiff
C12_F2R2	C12	Plate 5	SDHB_Intron7_1	SDHB	1	30	4	1	25	3.3				Plate5_r03c12f01p01-ch1sk1fk1fl1.tiff
C12_F2R2	C12	Plate 5	NUDT14_Intron1_1	NUDT14	1	61	4	2	25	1.6				Plate5_r03c12f01p01-ch1sk1fk1fl1.tiff
C12_F2R2	C12	Plate 5	MEAF6_Intron3_2	MEAF6	1	19	4	3	25	5.3				Plate5_r03c12f01p01-ch1sk1fk1fl1.tiff
C12_F2R2	C12	Plate 5	GATA2_Intron4_1	GATA2	1	17	4	4	25	5.9				Plate5_r03c12f01p01-ch1sk1fk1fl1.tiff
C12_F3R1	C12	Plate 3	TARS_Intron1_1	TARS	7	86	13	1	53.8	8.1	TARS	TARS_Intron1_1	1	Plate3_r03c12f01p01-ch1sk1fk1fl1.tiff
C12_F3R1	C12	Plate 3	RTN4IP1_Intron3_1	RTN4IP1	4	20	13	2	30.8	20	TARS	TARS_Intron1_1	1	Plate3_r03c12f01p01-ch1sk1fk1fl1.tiff
C12_F3R1	C12	Plate 3	LTA4H_Intron15_1	LTA4H	1	15	13	3	7.7	6.7	TARS	TARS_Intron1_1	1	Plate3_r03c12f01p01-ch1sk1fk1fl1.tiff
C12_F3R1	C12	Plate 3	PYGO2_Intron2_2	PYGO2	1	87	13	4	7.7	1.1	TARS	TARS_Intron1_1	1	Plate3_r03c12f01p01-ch1sk1fk1fl1.tiff
C12_F3R2	C12	Plate 6	SUPT7L_Intron4_1	SUPT7L	1	18	2	1	50	5.6				Plate6_r03c12f01p01-ch1sk1fk1fl1.tiff
C12_F3R2	C12	Plate 6	MTHFD1_Intron22_2	MTHFD1	1	74	2	2	50	1.4				Plate6_r03c12f01p01-ch1sk1fk1fl1.tiff
C2_F1R1	C2	Plate 1	PRPS1_Intron2_1	PRPS1	26	36	69	1	37.7	72.2	PRPS1;AASS	PRPS1_Intron2_1;AASS_Intron8_1	2	Plate1_r03c02f01p01-ch1sk1fk1fl1.tiff
C2_F1R1	C2	Plate 1	AASS_Intron8_1	AASS	25	33	69	2	36.2	75.8	PRPS1;AASS	PRPS1_Intron2_1;AASS_Intron8_1	2	Plate1_r03c02f01p01-ch1sk1fk1fl1.tiff
C2_F1R1	C2	Plate 1	DHCR24_Intron6_1	DHCR24	6	45	69	3	8.7	13.3	PRPS1;AASS	PRPS1_Intron2_1;AASS_Intron8_1	2	Plate1_r03c02f01p01-ch1sk1fk1fl1.tiff
C2_F1R1	C2	Plate 1	ALDH18A1_Intron12_1	ALDH18A1	1	49	69	4	1.4	2	PRPS1;AASS	PRPS1_Intron2_1;AASS_Intron8_1	2	Plate1_r03c02f01p01-ch1sk1fk1fl1.tiff
C2_F1R1	C2	Plate 1	ARG2_Intron4_1	ARG2	1	41	69	>4	1.4	2.4	PRPS1;AASS	PRPS1_Intron2_1;AASS_Intron8_1	2	Plate1_r03c02f01p01-ch1sk1fk1fl1.tiff
C2_F1R1	C2	Plate 1	NAMPT_Intron3_1	NAMPT	1	98	69	>4	1.4	1	PRPS1;AASS	PRPS1_Intron2_1;AASS_Intron8_1	2	Plate1_r03c02f01p01-ch1sk1fk1fl1.tiff
C2_F1R1	C2	Plate 1	CTNNB1_Intron4_1	CTNNB1	1	70	69	>4	1.4	1.4	PRPS1;AASS	PRPS1_Intron2_1;AASS_Intron8_1	2	Plate1_r03c02f01p01-ch1sk1fk1fl1.tiff
C2_F1R1	C2	Plate 1	CUL4B_Intron20_1	CUL4B	1	94	69	>4	1.4	1.1	PRPS1;AASS	PRPS1_Intron2_1;AASS_Intron8_1	2	Plate1_r03c02f01p01-ch1sk1fk1fl1.tiff
C2_F1R1	C2	Plate 1	IARS2_Intron1_1	IARS2	1	58	69	>4	1.4	1.7	PRPS1;AASS	PRPS1_Intron2_1;AASS_Intron8_1	2	Plate1_r03c02f01p01-ch1sk1fk1fl1.tiff
C2_F1R1	C2	Plate 1	NDUFA1_Intron1_2	NDUFA1	1	42	69	>4	1.4	2.4	PRPS1;AASS	PRPS1_Intron2_1;AASS_Intron8_1	2	Plate1_r03c02f01p01-ch1sk1fk1fl1.tiff
C2_F1R1	C2	Plate 1	LARS2_Intron19_1	LARS2	1	14	69	>4	1.4	7.1	PRPS1;AASS	PRPS1_Intron2_1;AASS_Intron8_1	2	Plate1_r03c02f01p01-ch1sk1fk1fl1.tiff
C2_F1R1	C2	Plate 1	OSBPL11_Intron12_1	OSBPL11	1	74	69	>4	1.4	1.4	PRPS1;AASS	PRPS1_Intron2_1;AASS_Intron8_1	2	Plate1_r03c02f01p01-ch1sk1fk1fl1.tiff
C2_F1R1	C2	Plate 1	NT5C3A_Intron1_1	NT5C3A	1	85	69	>4	1.4	1.2	PRPS1;AASS	PRPS1_Intron2_1;AASS_Intron8_1	2	Plate1_r03c02f01p01-ch1sk1fk1fl1.tiff
C2_F1R1	C2	Plate 1	QARS_Intron18_1	QARS	1	79	69	>4	1.4	1.3	PRPS1;AASS	PRPS1_Intron2_1;AASS_Intron8_1	2	Plate1_r03c02f01p01-ch1sk1fk1fl1.tiff
C2_F1R1	C2	Plate 1	PHF8_Intron21_1	PHF8	1	57	69	>4	1.4	1.8	PRPS1;AASS	PRPS1_Intron2_1;AASS_Intron8_1	2	Plate1_r03c02f01p01-ch1sk1fk1fl1.tiff
C2_F1R2	C2	Plate 4	PPIF_Intron3_1	PPIF	15	52	39	1	38.5	28.8	PPIF;GATA2	PPIF_Intron3_1;GATA2_Intron4_1	2	Plate4_r03c02f01p01-ch1sk1fk1fl1.tiff
C2_F1R2	C2	Plate 4	GATA2_Intron4_1	GATA2	13	17	39	2	33.3	76.5	PPIF;GATA2	PPIF_Intron3_1;GATA2_Intron4_1	2	Plate4_r03c02f01p01-ch1sk1fk1fl1.tiff
C2_F1R2	C2	Plate 4	CYP51A1_Intron1_1	CYP51A1	1	36	39	3	2.6	2.8	PPIF;GATA2	PPIF_Intron3_1;GATA2_Intron4_1	2	Plate4_r03c02f01p01-ch1sk1fk1fl1.tiff
C2_F1R2	C2	Plate 4	GCLM_Intron2_2	GCLM	1	41	39	4	2.6	2.4	PPIF;GATA2	PPIF_Intron3_1;GATA2_Intron4_1	2	Plate4_r03c02f01p01-ch1sk1fk1fl1.tiff
C2_F1R2	C2	Plate 4	ALDH9A1_Intron6_1	ALDH9A1	1	101	39	>4	2.6	1	PPIF;GATA2	PPIF_Intron3_1;GATA2_Intron4_1	2	Plate4_r03c02f01p01-ch1sk1fk1fl1.tiff
C2_F1R2	C2	Plate 4	PCGF6_Intron1_1	PCGF6	1	56	39	>4	2.6	1.8	PPIF;GATA2	PPIF_Intron3_1;GATA2_Intron4_1	2	Plate4_r03c02f01p01-ch1sk1fk1fl1.tiff
C2_F1R2	C2	Plate 4	MEAF6_Intron3_2	MEAF6	1	19	39	>4	2.6	5.3	PPIF;GATA2	PPIF_Intron3_1;GATA2_Intron4_1	2	Plate4_r03c02f01p01-ch1sk1fk1fl1.tiff
C2_F1R2	C2	Plate 4	KMT5A_Intron2_1	KMT5A	1	141	39	>4	2.6	0.7	PPIF;GATA2	PPIF_Intron3_1;GATA2_Intron4_1	2	Plate4_r03c02f01p01-ch1sk1fk1fl1.tiff
C2_F1R2	C2	Plate 4	NDUFA10_Intron7_1	NDUFA10	1	46	39	>4	2.6	2.2	PPIF;GATA2	PPIF_Intron3_1;GATA2_Intron4_1	2	Plate4_r03c02f01p01-ch1sk1fk1fl1.tiff
C2_F1R2	C2	Plate 4	SNW1_Intron12_1	SNW1	1	67	39	>4	2.6	1.5	PPIF;GATA2	PPIF_Intron3_1;GATA2_Intron4_1	2	Plate4_r03c02f01p01-ch1sk1fk1fl1.tiff
C2_F1R2	C2	Plate 4	BCOR_Intron3_1	BCOR	1	15	39	>4	2.6	6.7	PPIF;GATA2	PPIF_Intron3_1;GATA2_Intron4_1	2	Plate4_r03c02f01p01-ch1sk1fk1fl1.tiff
C2_F1R2	C2	Plate 4	SIRT7_Intron1_1	SIRT7	1	10	39	>4	2.6	10	PPIF;GATA2	PPIF_Intron3_1;GATA2_Intron4_1	2	Plate4_r03c02f01p01-ch1sk1fk1fl1.tiff
C2_F1R2	C2	Plate 4	GARS_Intron1_1	GARS	1	62	39	>4	2.6	1.6	PPIF;GATA2	PPIF_Intron3_1;GATA2_Intron4_1	2	Plate4_r03c02f01p01-ch1sk1fk1fl1.tiff
C2_F1R3	C2	Plate 7	CHST13_Intron2_1	CHST13	16	21	22	1	72.7	76.2	CHST13	CHST13_Intron2_1	1	Plate7_r03c02f01p01-ch1sk1fk1fl1.tiff
C2_F1R3	C2	Plate 7	NXN_Intron7_1	NXN	3	85	22	2	13.6	3.5	CHST13	CHST13_Intron2_1	1	Plate7_r03c02f01p01-ch1sk1fk1fl1.tiff
C2_F1R3	C2	Plate 7	GOT2_Intron9_1	GOT2	1	20	22	3	4.5	5	CHST13	CHST13_Intron2_1	1	Plate7_r03c02f01p01-ch1sk1fk1fl1.tiff
C2_F1R3	C2	Plate 7	CA4_Intron5_1	CA4	1	33	22	4	4.5	3	CHST13	CHST13_Intron2_1	1	Plate7_r03c02f01p01-ch1sk1fk1fl1.tiff
C2_F1R3	C2	Plate 7	MTHFD1_Intron22_2	MTHFD1	1	74	22	>4	4.5	1.4	CHST13	CHST13_Intron2_1	1	Plate7_r03c02f01p01-ch1sk1fk1fl1.tiff
C2_F2R1	C2	Plate 2	PPAT_Intron9_1	PPAT	12	78	23	1	52.2	15.4	PPAT	PPAT_Intron9_1	1	Plate2_r03c02f01p01-ch1sk1fk1fl1.tiff
C2_F2R1	C2	Plate 2	GLO1_Intron1_1	GLO1	2	31	23	2	8.7	6.5	PPAT	PPAT_Intron9_1	1	Plate2_r03c02f01p01-ch1sk1fk1fl1.tiff
C2_F2R1	C2	Plate 2	GFPT1_Intron19_1	GFPT1	2	85	23	3	8.7	2.4	PPAT	PPAT_Intron9_1	1	Plate2_r03c02f01p01-ch1sk1fk1fl1.tiff
C2_F2R1	C2	Plate 2	PARP1_Intron1_2	PARP1	1	24	23	4	4.3	4.2	PPAT	PPAT_Intron9_1	1	Plate2_r03c02f01p01-ch1sk1fk1fl1.tiff
C2_F2R1	C2	Plate 2	MORF4L1_Intron9_1	MORF4L1	1	39	23	>4	4.3	2.6	PPAT	PPAT_Intron9_1	1	Plate2_r03c02f01p01-ch1sk1fk1fl1.tiff
C2_F2R1	C2	Plate 2	NAMPT_Intron3_1	NAMPT	1	98	23	>4	4.3	1	PPAT	PPAT_Intron9_1	1	Plate2_r03c02f01p01-ch1sk1fk1fl1.tiff
C2_F2R1	C2	Plate 2	SUCLA2_Intron5_1	SUCLA2	1	66	23	>4	4.3	1.5	PPAT	PPAT_Intron9_1	1	Plate2_r03c02f01p01-ch1sk1fk1fl1.tiff
C2_F2R1	C2	Plate 2	ACLY_Intron7_1	ACLY	1	68	23	>4	4.3	1.5	PPAT	PPAT_Intron9_1	1	Plate2_r03c02f01p01-ch1sk1fk1fl1.tiff
C2_F2R1	C2	Plate 2	UQCRC2_Intron11_1	UQCRC2	1	86	23	>4	4.3	1.2	PPAT	PPAT_Intron9_1	1	Plate2_r03c02f01p01-ch1sk1fk1fl1.tiff
C2_F2R1	C2	Plate 2	COQ10A_Intron3_1	COQ10A	1	50	23	>4	4.3	2	PPAT	PPAT_Intron9_1	1	Plate2_r03c02f01p01-ch1sk1fk1fl1.tiff
C2_F2R2	C2	Plate 5	GLO1_Intron1_1	GLO1	23	31	30	1	76.7	74.2	GLO1	GLO1_Intron1_1	1	Plate5_r03c02f01p01-ch1sk1fk1fl1.tiff
C2_F2R2	C2	Plate 5	EHMT1_Intron25_1	EHMT1	2	34	30	2	6.7	5.9	GLO1	GLO1_Intron1_1	1	Plate5_r03c02f01p01-ch1sk1fk1fl1.tiff
C2_F2R2	C2	Plate 5	ATIC_Intron14_1	ATIC	1	35	30	3	3.3	2.9	GLO1	GLO1_Intron1_1	1	Plate5_r03c02f01p01-ch1sk1fk1fl1.tiff
C2_F2R2	C2	Plate 5	COX7A2_Intron2_2	COX7A2	1	28	30	4	3.3	3.6	GLO1	GLO1_Intron1_1	1	Plate5_r03c02f01p01-ch1sk1fk1fl1.tiff
C2_F2R2	C2	Plate 5	GFPT1_Intron19_1	GFPT1	1	85	30	>4	3.3	1.2	GLO1	GLO1_Intron1_1	1	Plate5_r03c02f01p01-ch1sk1fk1fl1.tiff
C2_F2R2	C2	Plate 5	DPYSL5_Intron11_1	DPYSL5	1	56	30	>4	3.3	1.8	GLO1	GLO1_Intron1_1	1	Plate5_r03c02f01p01-ch1sk1fk1fl1.tiff
C2_F2R2	C2	Plate 5	NAT10_Intron7_1	NAT10	1	27	30	>4	3.3	3.7	GLO1	GLO1_Intron1_1	1	Plate5_r03c02f01p01-ch1sk1fk1fl1.tiff
C2_F2R3	C2	Plate 8	FMR1_Intron12_1	FMR1	21	112	24	1	87.5	18.8	FMR1	FMR1_Intron12_1	1	Plate8_r03c02f01p01-ch1sk1fk1fl1.tiff
C2_F2R3	C2	Plate 8	TARS_Intron1_1	TARS	1	86	24	2	4.2	1.2	FMR1	FMR1_Intron12_1	1	Plate8_r03c02f01p01-ch1sk1fk1fl1.tiff
C2_F2R3	C2	Plate 8	PIR_Intron3_1	PIR	1	12	24	3	4.2	8.3	FMR1	FMR1_Intron12_1	1	Plate8_r03c02f01p01-ch1sk1fk1fl1.tiff
C2_F2R3	C2	Plate 8	ACLY_Intron22_1	ACLY	1	140	24	4	4.2	0.7	FMR1	FMR1_Intron12_1	1	Plate8_r03c02f01p01-ch1sk1fk1fl1.tiff
C2_F3R1	C2	Plate 3	NAMPT_Intron3_1	NAMPT	53	98	69	1	76.8	54.1	NAMPT	NAMPT_Intron3_1	1	Plate3_r03c02f01p01-ch1sk1fk1fl1.tiff
C2_F3R1	C2	Plate 3	NDUFA4_Intron3_2	NDUFA4	2	34	69	2	2.9	5.9	NAMPT	NAMPT_Intron3_1	1	Plate3_r03c02f01p01-ch1sk1fk1fl1.tiff
C2_F3R1	C2	Plate 3	DHCR24_Intron6_1	DHCR24	1	45	69	3	1.4	2.2	NAMPT	NAMPT_Intron3_1	1	Plate3_r03c02f01p01-ch1sk1fk1fl1.tiff
C2_F3R1	C2	Plate 3	MTR_Intron2_1	MTR	1	13	69	4	1.4	7.7	NAMPT	NAMPT_Intron3_1	1	Plate3_r03c02f01p01-ch1sk1fk1fl1.tiff
C2_F3R1	C2	Plate 3	GFPT1_Intron19_1	GFPT1	1	85	69	>4	1.4	1.2	NAMPT	NAMPT_Intron3_1	1	Plate3_r03c02f01p01-ch1sk1fk1fl1.tiff
C2_F3R1	C2	Plate 3	NSUN2_Intron4_1	NSUN2	1	65	69	>4	1.4	1.5	NAMPT	NAMPT_Intron3_1	1	Plate3_r03c02f01p01-ch1sk1fk1fl1.tiff
C2_F3R1	C2	Plate 3	PIK3C2G_Intron1_1	PIK3C2G	1	23	69	>4	1.4	4.3	NAMPT	NAMPT_Intron3_1	1	Plate3_r03c02f01p01-ch1sk1fk1fl1.tiff
C2_F3R1	C2	Plate 3	CERS2_Intron5_1	CERS2	1	60	69	>4	1.4	1.7	NAMPT	NAMPT_Intron3_1	1	Plate3_r03c02f01p01-ch1sk1fk1fl1.tiff
C2_F3R1	C2	Plate 3	PYGO2_Intron2_2	PYGO2	1	87	69	>4	1.4	1.1	NAMPT	NAMPT_Intron3_1	1	Plate3_r03c02f01p01-ch1sk1fk1fl1.tiff
C2_F3R1	C2	Plate 3	ATAD3B_Intron7_1	ATAD3B	1	31	69	>4	1.4	3.2	NAMPT	NAMPT_Intron3_1	1	Plate3_r03c02f01p01-ch1sk1fk1fl1.tiff
C2_F3R1	C2	Plate 3	SUCLA2_Intron5_1	SUCLA2	1	66	69	>4	1.4	1.5	NAMPT	NAMPT_Intron3_1	1	Plate3_r03c02f01p01-ch1sk1fk1fl1.tiff
C2_F3R1	C2	Plate 3	HUWE1_Intron8_1	HUWE1	1	142	69	>4	1.4	0.7	NAMPT	NAMPT_Intron3_1	1	Plate3_r03c02f01p01-ch1sk1fk1fl1.tiff
C2_F3R1	C2	Plate 3	DOT1L_Intron4_1	DOT1L	1	85	69	>4	1.4	1.2	NAMPT	NAMPT_Intron3_1	1	Plate3_r03c02f01p01-ch1sk1fk1fl1.tiff
C2_F3R1	C2	Plate 3	MEN1_Intron8_1	MEN1	1	41	69	>4	1.4	2.4	NAMPT	NAMPT_Intron3_1	1	Plate3_r03c02f01p01-ch1sk1fk1fl1.tiff
C2_F3R1	C2	Plate 3	GCKR_Intron15_1	GCKR	1	27	69	>4	1.4	3.7	NAMPT	NAMPT_Intron3_1	1	Plate3_r03c02f01p01-ch1sk1fk1fl1.tiff
C2_F3R1	C2	Plate 3	TYMS_Intron4_1	TYMS	1	21	69	>4	1.4	4.8	NAMPT	NAMPT_Intron3_1	1	Plate3_r03c02f01p01-ch1sk1fk1fl1.tiff
C2_F3R2	C2	Plate 6	SMNDC1_Intron2_2	SMNDC1	26	34	36	1	72.2	76.5	SMNDC1	SMNDC1_Intron2_2	1	Plate6_r03c02f01p01-ch1sk1fk1fl1.tiff
C2_F3R2	C2	Plate 6	FMO3_Intron2_2	FMO3	2	20	36	2	5.6	10	SMNDC1	SMNDC1_Intron2_2	1	Plate6_r03c02f01p01-ch1sk1fk1fl1.tiff
C2_F3R2	C2	Plate 6	NUDT14_Intron1_1	NUDT14	1	61	36	3	2.8	1.6	SMNDC1	SMNDC1_Intron2_2	1	Plate6_r03c02f01p01-ch1sk1fk1fl1.tiff
C2_F3R2	C2	Plate 6	EHMT1_Intron25_1	EHMT1	1	34	36	4	2.8	2.9	SMNDC1	SMNDC1_Intron2_2	1	Plate6_r03c02f01p01-ch1sk1fk1fl1.tiff
C2_F3R2	C2	Plate 6	PAPSS2_Intron3_1	PAPSS2	1	18	36	>4	2.8	5.6	SMNDC1	SMNDC1_Intron2_2	1	Plate6_r03c02f01p01-ch1sk1fk1fl1.tiff
C2_F3R2	C2	Plate 6	MEAF6_Intron3_2	MEAF6	1	19	36	>4	2.8	5.3	SMNDC1	SMNDC1_Intron2_2	1	Plate6_r03c02f01p01-ch1sk1fk1fl1.tiff
C2_F3R2	C2	Plate 6	ALDH1L2_Intron1_1	ALDH1L2	1	8	36	>4	2.8	12.5	SMNDC1	SMNDC1_Intron2_2	1	Plate6_r03c02f01p01-ch1sk1fk1fl1.tiff
C2_F3R2	C2	Plate 6	SUPT7L_Intron4_1	SUPT7L	1	18	36	>4	2.8	5.6	SMNDC1	SMNDC1_Intron2_2	1	Plate6_r03c02f01p01-ch1sk1fk1fl1.tiff
C2_F3R2	C2	Plate 6	PYGO2_Intron2_2	PYGO2	1	87	36	>4	2.8	1.1	SMNDC1	SMNDC1_Intron2_2	1	Plate6_r03c02f01p01-ch1sk1fk1fl1.tiff
C2_F3R2	C2	Plate 6	GARS_Intron1_1	GARS	1	62	36	>4	2.8	1.6	SMNDC1	SMNDC1_Intron2_2	1	Plate6_r03c02f01p01-ch1sk1fk1fl1.tiff
C2_F3R3	C2	Plate 9	PYGO2_Intron2_2	PYGO2	2	87	4	1	50	2.3
C2_F3R3	C2	Plate 9	VPS4B_Intron1_1	VPS4B	1	84	4	2	25	1.2
C2_F3R3	C2	Plate 9	DOT1L_Intron4_1	DOT1L	1	85	4	3	25	1.2
C3_F1R1	C3	Plate 1	CTNNB1_Intron4_1	CTNNB1	48	70	63	1	76.2	68.6	CTNNB1	CTNNB1_Intron4_1	1	Plate1_r03c03f01p01-ch1sk1fk1fl1.tiff
C3_F1R1	C3	Plate 1	CTR9_Intron1_1	CTR9	2	180	63	2	3.2	1.1	CTNNB1	CTNNB1_Intron4_1	1	Plate1_r03c03f01p01-ch1sk1fk1fl1.tiff
C3_F1R1	C3	Plate 1	NDUFA4_Intron3_2	NDUFA4	2	34	63	3	3.2	5.9	CTNNB1	CTNNB1_Intron4_1	1	Plate1_r03c03f01p01-ch1sk1fk1fl1.tiff
C3_F1R1	C3	Plate 1	DARS2_Intron9_1	DARS2	1	80	63	4	1.6	1.3	CTNNB1	CTNNB1_Intron4_1	1	Plate1_r03c03f01p01-ch1sk1fk1fl1.tiff
C3_F1R1	C3	Plate 1	NDUFS6_Intron2_1	NDUFS6	1	54	63	>4	1.6	1.9	CTNNB1	CTNNB1_Intron4_1	1	Plate1_r03c03f01p01-ch1sk1fk1fl1.tiff
C3_F1R1	C3	Plate 1	SMOX_Intron7_1	SMOX	1	57	63	>4	1.6	1.8	CTNNB1	CTNNB1_Intron4_1	1	Plate1_r03c03f01p01-ch1sk1fk1fl1.tiff
C3_F1R1	C3	Plate 1	MAN2B2_Intron1_1	MAN2B2	1	6	63	>4	1.6	16.7	CTNNB1	CTNNB1_Intron4_1	1	Plate1_r03c03f01p01-ch1sk1fk1fl1.tiff
C3_F1R1	C3	Plate 1	NT5C3B_Intron1_1	NT5C3B	1	47	63	>4	1.6	2.1	CTNNB1	CTNNB1_Intron4_1	1	Plate1_r03c03f01p01-ch1sk1fk1fl1.tiff
C3_F1R1	C3	Plate 1	AASS_Intron8_1	AASS	1	33	63	>4	1.6	3	CTNNB1	CTNNB1_Intron4_1	1	Plate1_r03c03f01p01-ch1sk1fk1fl1.tiff
C3_F1R1	C3	Plate 1	ODC1_Intron7_1	ODC1	1	10	63	>4	1.6	10	CTNNB1	CTNNB1_Intron4_1	1	Plate1_r03c03f01p01-ch1sk1fk1fl1.tiff
C3_F1R1	C3	Plate 1	HDAC10_Intron10_1	HDAC10	1	16	63	>4	1.6	6.3	CTNNB1	CTNNB1_Intron4_1	1	Plate1_r03c03f01p01-ch1sk1fk1fl1.tiff
C3_F1R1	C3	Plate 1	CUL4B_Intron20_1	CUL4B	1	94	63	>4	1.6	1.1	CTNNB1	CTNNB1_Intron4_1	1	Plate1_r03c03f01p01-ch1sk1fk1fl1.tiff
C3_F1R1	C3	Plate 1	PLCB1_Intron2_1	PLCB1	1	42	63	>4	1.6	2.4	CTNNB1	CTNNB1_Intron4_1	1	Plate1_r03c03f01p01-ch1sk1fk1fl1.tiff
C3_F1R1	C3	Plate 1	FH_Intron3_1	FH	1	100	63	>4	1.6	1	CTNNB1	CTNNB1_Intron4_1	1	Plate1_r03c03f01p01-ch1sk1fk1fl1.tiff
C3_F1R2	C3	Plate 4	UCKL1_Intron3_1	UCKL1	23	26	35	1	65.7	88.5	UCKL1	UCKL1_Intron3_1	1	Plate4_r03c03f01p01-ch1sk1fk1fl1.tiff
C3_F1R2	C3	Plate 4	RRM2_Intron2_1	RRM2	1	33	35	2	2.9	3	UCKL1	UCKL1_Intron3_1	1	Plate4_r03c03f01p01-ch1sk1fk1fl1.tiff
C3_F1R2	C3	Plate 4	CYP51A1_Intron1_1	CYP51A1	1	36	35	3	2.9	2.8	UCKL1	UCKL1_Intron3_1	1	Plate4_r03c03f01p01-ch1sk1fk1fl1.tiff
C3_F1R2	C3	Plate 4	SET_Intron7_1	SET	1	29	35	4	2.9	3.4	UCKL1	UCKL1_Intron3_1	1	Plate4_r03c03f01p01-ch1sk1fk1fl1.tiff
C3_F1R2	C3	Plate 4	RTF1_Intron5_1	RTF1	1	17	35	>4	2.9	5.9	UCKL1	UCKL1_Intron3_1	1	Plate4_r03c03f01p01-ch1sk1fk1fl1.tiff
C3_F1R2	C3	Plate 4	ALDH9A1_Intron6_1	ALDH9A1	1	101	35	>4	2.9	1	UCKL1	UCKL1_Intron3_1	1	Plate4_r03c03f01p01-ch1sk1fk1fl1.tiff
C3_F1R2	C3	Plate 4	MEAF6_Intron3_2	MEAF6	1	19	35	>4	2.9	5.3	UCKL1	UCKL1_Intron3_1	1	Plate4_r03c03f01p01-ch1sk1fk1fl1.tiff
C3_F1R2	C3	Plate 4	KMT5A_Intron2_1	KMT5A	1	141	35	>4	2.9	0.7	UCKL1	UCKL1_Intron3_1	1	Plate4_r03c03f01p01-ch1sk1fk1fl1.tiff
C3_F1R2	C3	Plate 4	SUPT7L_Intron4_1	SUPT7L	1	18	35	>4	2.9	5.6	UCKL1	UCKL1_Intron3_1	1	Plate4_r03c03f01p01-ch1sk1fk1fl1.tiff
C3_F1R2	C3	Plate 4	GOT2_Intron9_1	GOT2	1	20	35	>4	2.9	5	UCKL1	UCKL1_Intron3_1	1	Plate4_r03c03f01p01-ch1sk1fk1fl1.tiff
C3_F1R2	C3	Plate 4	PARK7_Intron4_2	PARK7	1	139	35	>4	2.9	0.7	UCKL1	UCKL1_Intron3_1	1	Plate4_r03c03f01p01-ch1sk1fk1fl1.tiff
C3_F1R2	C3	Plate 4	GARS_Intron1_1	GARS	1	62	35	>4	2.9	1.6	UCKL1	UCKL1_Intron3_1	1	Plate4_r03c03f01p01-ch1sk1fk1fl1.tiff
C3_F1R2	C3	Plate 4	PHF8_Intron21_1	PHF8	1	57	35	>4	2.9	1.8	UCKL1	UCKL1_Intron3_1	1	Plate4_r03c03f01p01-ch1sk1fk1fl1.tiff
C3_F1R3	C3	Plate 7	PLOD3_Intron8_1	PLOD3	25	90	30	1	83.3	27.8	PLOD3	PLOD3_Intron8_1	1	Plate7_r03c03f01p01-ch1sk1fk1fl1.tiff
C3_F1R3	C3	Plate 7	MTR_Intron7_1	MTR	1	57	30	2	3.3	1.8	PLOD3	PLOD3_Intron8_1	1	Plate7_r03c03f01p01-ch1sk1fk1fl1.tiff
C3_F1R3	C3	Plate 7	UAP1_Intron10_1	UAP1	1	10	30	3	3.3	10	PLOD3	PLOD3_Intron8_1	1	Plate7_r03c03f01p01-ch1sk1fk1fl1.tiff
C3_F1R3	C3	Plate 7	TARS_Intron1_1	TARS	1	86	30	4	3.3	1.2	PLOD3	PLOD3_Intron8_1	1	Plate7_r03c03f01p01-ch1sk1fk1fl1.tiff
C3_F1R3	C3	Plate 7	SMS_Intron5_2	SMS	1	135	30	>4	3.3	0.7	PLOD3	PLOD3_Intron8_1	1	Plate7_r03c03f01p01-ch1sk1fk1fl1.tiff
C3_F1R3	C3	Plate 7	ACLY_Intron22_1	ACLY	1	140	30	>4	3.3	0.7	PLOD3	PLOD3_Intron8_1	1	Plate7_r03c03f01p01-ch1sk1fk1fl1.tiff
C3_F2R1	C3	Plate 2	ACLY_Intron22_1	ACLY	16	140	21	1	76.2	11.4	ACLY	ACLY_Intron22_1	1	Plate2_r03c03f01p01-ch1sk1fk1fl1.tiff
C3_F2R1	C3	Plate 2	DPYSL5_Intron6_1	DPYSL5	1	18	21	2	4.8	5.6	ACLY	ACLY_Intron22_1	1	Plate2_r03c03f01p01-ch1sk1fk1fl1.tiff
C3_F2R1	C3	Plate 2	GATAD2A_Intron7_1	GATAD2A	1	58	21	3	4.8	1.7	ACLY	ACLY_Intron22_1	1	Plate2_r03c03f01p01-ch1sk1fk1fl1.tiff
C3_F2R1	C3	Plate 2	GSTP1_Intron3_1	GSTP1	1	2	21	4	4.8	50	ACLY	ACLY_Intron22_1	1	Plate2_r03c03f01p01-ch1sk1fk1fl1.tiff
C3_F2R1	C3	Plate 2	NDUFV2_Intron2_1	NDUFV2	1	36	21	>4	4.8	2.8	ACLY	ACLY_Intron22_1	1	Plate2_r03c03f01p01-ch1sk1fk1fl1.tiff
C3_F2R1	C3	Plate 2	HIBCH_Intron2_1	HIBCH	1	22	21	>4	4.8	4.5	ACLY	ACLY_Intron22_1	1	Plate2_r03c03f01p01-ch1sk1fk1fl1.tiff
C3_F2R2	C3	Plate 5	TAF9B_Intron1_2	TAF9B	18	87	18	1	100	20.7	TAF9B	TAF9B_Intron1_2	1	Plate5_r03c03f01p01-ch1sk1fk1fl1.tiff
C3_F2R3	C3	Plate 8	PRDX3_Intron6_1	PRDX3	11	13	13	1	84.6	84.6	PRDX3	PRDX3_Intron6_1	1	Plate8_r03c03f01p01-ch1sk1fk1fl1.tiff
C3_F2R3	C3	Plate 8	FDPS_Intron10_1	FDPS	2	2	13	2	15.4	100	PRDX3	PRDX3_Intron6_1	1	Plate8_r03c03f01p01-ch1sk1fk1fl1.tiff
C3_F3R1	C3	Plate 3	MORF4L1_Intron9_1	MORF4L1	33	39	81	1	40.7	84.6	MORF4L1;KMT5A;GUCY2D	MORF4L1_Intron9_1;KMT5A_Intron2_1;GUCY2D_Intron12_1	3	Plate3_r03c03f01p01-ch1sk1fk1fl1.tiff
C3_F3R1	C3	Plate 3	KMT5A_Intron2_1	KMT5A	20	141	81	2	24.7	14.2	MORF4L1;KMT5A;GUCY2D	MORF4L1_Intron9_1;KMT5A_Intron2_1;GUCY2D_Intron12_1	3	Plate3_r03c03f01p01-ch1sk1fk1fl1.tiff
C3_F3R1	C3	Plate 3	GUCY2D_Intron12_1	GUCY2D	18	18	81	3	22.2	100	MORF4L1;KMT5A;GUCY2D	MORF4L1_Intron9_1;KMT5A_Intron2_1;GUCY2D_Intron12_1	3	Plate3_r03c03f01p01-ch1sk1fk1fl1.tiff
C3_F3R1	C3	Plate 3	PRPS1_Intron2_2	PRPS1	2	139	81	4	2.5	1.4	MORF4L1;KMT5A;GUCY2D	MORF4L1_Intron9_1;KMT5A_Intron2_1;GUCY2D_Intron12_1	3	Plate3_r03c03f01p01-ch1sk1fk1fl1.tiff
C3_F3R1	C3	Plate 3	RLF_Intron7_1	RLF	2	43	81	>4	2.5	4.7	MORF4L1;KMT5A;GUCY2D	MORF4L1_Intron9_1;KMT5A_Intron2_1;GUCY2D_Intron12_1	3	Plate3_r03c03f01p01-ch1sk1fk1fl1.tiff
C3_F3R1	C3	Plate 3	MUT_Intron5_1	MUT	1	33	81	>4	1.2	3	MORF4L1;KMT5A;GUCY2D	MORF4L1_Intron9_1;KMT5A_Intron2_1;GUCY2D_Intron12_1	3	Plate3_r03c03f01p01-ch1sk1fk1fl1.tiff
C3_F3R1	C3	Plate 3	CYP4F11_Intron5_1	CYP4F11	1	1	81	>4	1.2	100	MORF4L1;KMT5A;GUCY2D	MORF4L1_Intron9_1;KMT5A_Intron2_1;GUCY2D_Intron12_1	3	Plate3_r03c03f01p01-ch1sk1fk1fl1.tiff
C3_F3R1	C3	Plate 3	LTA4H_Intron13_1	LTA4H	1	28	81	>4	1.2	3.6	MORF4L1;KMT5A;GUCY2D	MORF4L1_Intron9_1;KMT5A_Intron2_1;GUCY2D_Intron12_1	3	Plate3_r03c03f01p01-ch1sk1fk1fl1.tiff
C3_F3R1	C3	Plate 3	GANAB_Intron21_1	GANAB	1	90	81	>4	1.2	1.1	MORF4L1;KMT5A;GUCY2D	MORF4L1_Intron9_1;KMT5A_Intron2_1;GUCY2D_Intron12_1	3	Plate3_r03c03f01p01-ch1sk1fk1fl1.tiff
C3_F3R1	C3	Plate 3	CTNNB1_Intron4_1	CTNNB1	1	70	81	>4	1.2	1.4	MORF4L1;KMT5A;GUCY2D	MORF4L1_Intron9_1;KMT5A_Intron2_1;GUCY2D_Intron12_1	3	Plate3_r03c03f01p01-ch1sk1fk1fl1.tiff
C3_F3R1	C3	Plate 3	MEN1_Intron8_1	MEN1	1	41	81	>4	1.2	2.4	MORF4L1;KMT5A;GUCY2D	MORF4L1_Intron9_1;KMT5A_Intron2_1;GUCY2D_Intron12_1	3	Plate3_r03c03f01p01-ch1sk1fk1fl1.tiff
C3_F3R2	C3	Plate 6	LMNA_Intron8_1	LMNA	16	21	36	1	44.4	76.2	LMNA	LMNA_Intron8_1	1	Plate6_r03c03f01p01-ch1sk1fk1fl1.tiff
C3_F3R2	C3	Plate 6	NDUFA8_Intron1_2	NDUFA8	9	39	36	2	25	23.1	LMNA	LMNA_Intron8_1	1	Plate6_r03c03f01p01-ch1sk1fk1fl1.tiff
C3_F3R2	C3	Plate 6	CYP51A1_Intron1_1	CYP51A1	1	36	36	3	2.8	2.8	LMNA	LMNA_Intron8_1	1	Plate6_r03c03f01p01-ch1sk1fk1fl1.tiff
C3_F3R2	C3	Plate 6	NDUFS7_Intron4_1	NDUFS7	1	13	36	4	2.8	7.7	LMNA	LMNA_Intron8_1	1	Plate6_r03c03f01p01-ch1sk1fk1fl1.tiff
C3_F3R2	C3	Plate 6	MUT_Intron5_1	MUT	1	33	36	>4	2.8	3	LMNA	LMNA_Intron8_1	1	Plate6_r03c03f01p01-ch1sk1fk1fl1.tiff
C3_F3R2	C3	Plate 6	MORF4L1_Intron9_1	MORF4L1	1	39	36	>4	2.8	2.6	LMNA	LMNA_Intron8_1	1	Plate6_r03c03f01p01-ch1sk1fk1fl1.tiff
C3_F3R2	C3	Plate 6	PAICS_Intron7_1	PAICS	1	46	36	>4	2.8	2.2	LMNA	LMNA_Intron8_1	1	Plate6_r03c03f01p01-ch1sk1fk1fl1.tiff
C3_F3R2	C3	Plate 6	UCKL1_Intron3_1	UCKL1	1	26	36	>4	2.8	3.8	LMNA	LMNA_Intron8_1	1	Plate6_r03c03f01p01-ch1sk1fk1fl1.tiff
C3_F3R2	C3	Plate 6	VPS4A_Intron9_1	VPS4A	1	17	36	>4	2.8	5.9	LMNA	LMNA_Intron8_1	1	Plate6_r03c03f01p01-ch1sk1fk1fl1.tiff
C3_F3R2	C3	Plate 6	MVK_Intron9_1	MVK	1	27	36	>4	2.8	3.7	LMNA	LMNA_Intron8_1	1	Plate6_r03c03f01p01-ch1sk1fk1fl1.tiff
C3_F3R2	C3	Plate 6	LEO1_Intron9_1	LEO1	1	12	36	>4	2.8	8.3	LMNA	LMNA_Intron8_1	1	Plate6_r03c03f01p01-ch1sk1fk1fl1.tiff
C3_F3R2	C3	Plate 6	SYNJ2_Intron10_1	SYNJ2	1	18	36	>4	2.8	5.6	LMNA	LMNA_Intron8_1	1	Plate6_r03c03f01p01-ch1sk1fk1fl1.tiff
C3_F3R2	C3	Plate 6	NDUFA1_Intron1_2	NDUFA1	1	42	36	>4	2.8	2.4	LMNA	LMNA_Intron8_1	1	Plate6_r03c03f01p01-ch1sk1fk1fl1.tiff
C3_F3R3	C3	Plate 9	VPS4B_Intron1_1	VPS4B	1	84	2	1	50	1.2
C3_F3R3	C3	Plate 9	PRDX3_Intron6_1	PRDX3	1	13	2	2	50	7.7
C4_F1R1	C4	Plate 1	MEN1_Intron8_1	MEN1	23	41	51	1	45.1	56.1	MEN1;LTA4H	MEN1_Intron8_1;LTA4H_Intron13_1	2	Plate1_r03c04f01p01-ch1sk1fk1fl1.tiff
C4_F1R1	C4	Plate 1	LTA4H_Intron13_1	LTA4H	15	28	51	2	29.4	53.6	MEN1;LTA4H	MEN1_Intron8_1;LTA4H_Intron13_1	2	Plate1_r03c04f01p01-ch1sk1fk1fl1.tiff
C4_F1R1	C4	Plate 1	RLF_Intron7_1	RLF	3	43	51	3	5.9	7	MEN1;LTA4H	MEN1_Intron8_1;LTA4H_Intron13_1	2	Plate1_r03c04f01p01-ch1sk1fk1fl1.tiff
C4_F1R1	C4	Plate 1	PDHB_Intron5_1	PDHB	2	22	51	4	3.9	9.1	MEN1;LTA4H	MEN1_Intron8_1;LTA4H_Intron13_1	2	Plate1_r03c04f01p01-ch1sk1fk1fl1.tiff
C4_F1R1	C4	Plate 1	SUMF1_Intron1_1	SUMF1	2	13	51	>4	3.9	15.4	MEN1;LTA4H	MEN1_Intron8_1;LTA4H_Intron13_1	2	Plate1_r03c04f01p01-ch1sk1fk1fl1.tiff
C4_F1R1	C4	Plate 1	TALDO1_Intron7_1	TALDO1	1	45	51	>4	2	2.2	MEN1;LTA4H	MEN1_Intron8_1;LTA4H_Intron13_1	2	Plate1_r03c04f01p01-ch1sk1fk1fl1.tiff
C4_F1R1	C4	Plate 1	KMT5A_Intron2_1	KMT5A	1	141	51	>4	2	0.7	MEN1;LTA4H	MEN1_Intron8_1;LTA4H_Intron13_1	2	Plate1_r03c04f01p01-ch1sk1fk1fl1.tiff
C4_F1R1	C4	Plate 1	RARS_Intron12_1	RARS	1	9	51	>4	2	11.1	MEN1;LTA4H	MEN1_Intron8_1;LTA4H_Intron13_1	2	Plate1_r03c04f01p01-ch1sk1fk1fl1.tiff
C4_F1R1	C4	Plate 1	NAMPT_Intron3_1	NAMPT	1	98	51	>4	2	1	MEN1;LTA4H	MEN1_Intron8_1;LTA4H_Intron13_1	2	Plate1_r03c04f01p01-ch1sk1fk1fl1.tiff
C4_F1R1	C4	Plate 1	CTR9_Intron1_1	CTR9	1	180	51	>4	2	0.6	MEN1;LTA4H	MEN1_Intron8_1;LTA4H_Intron13_1	2	Plate1_r03c04f01p01-ch1sk1fk1fl1.tiff
C4_F1R1	C4	Plate 1	ACLY_Intron22_1	ACLY	1	140	51	>4	2	0.7	MEN1;LTA4H	MEN1_Intron8_1;LTA4H_Intron13_1	2	Plate1_r03c04f01p01-ch1sk1fk1fl1.tiff
C4_F1R2	C4	Plate 4	TFAM_Intron3_1	TFAM	3	11	16	1	18.8	27.3				Plate4_r03c04f01p01-ch1sk1fk1fl1.tiff
C4_F1R2	C4	Plate 4	HSD17B10_Intron4_1	HSD17B10	2	73	16	2	12.5	2.7				Plate4_r03c04f01p01-ch1sk1fk1fl1.tiff
C4_F1R2	C4	Plate 4	ENO1_Intron6_2	ENO1	1	22	16	3	6.3	4.5				Plate4_r03c04f01p01-ch1sk1fk1fl1.tiff
C4_F1R2	C4	Plate 4	PLCG1_Intron7_1	PLCG1	1	13	16	4	6.3	7.7				Plate4_r03c04f01p01-ch1sk1fk1fl1.tiff
C4_F1R2	C4	Plate 4	OXCT1_Intron1_1	OXCT1	1	34	16	>4	6.3	2.9				Plate4_r03c04f01p01-ch1sk1fk1fl1.tiff
C4_F1R2	C4	Plate 4	UBE2N_Intron1_1	UBE2N	1	88	16	>4	6.3	1.1				Plate4_r03c04f01p01-ch1sk1fk1fl1.tiff
C4_F1R2	C4	Plate 4	PGAM1_Intron2_3	PGAM1	1	15	16	>4	6.3	6.7				Plate4_r03c04f01p01-ch1sk1fk1fl1.tiff
C4_F1R2	C4	Plate 4	NDUFS3_Intron6_1	NDUFS3	1	15	16	>4	6.3	6.7				Plate4_r03c04f01p01-ch1sk1fk1fl1.tiff
C4_F1R2	C4	Plate 4	PLOD3_Intron8_1	PLOD3	1	90	16	>4	6.3	1.1				Plate4_r03c04f01p01-ch1sk1fk1fl1.tiff
C4_F1R2	C4	Plate 4	GLO1_Intron1_1	GLO1	1	31	16	>4	6.3	3.2				Plate4_r03c04f01p01-ch1sk1fk1fl1.tiff
C4_F1R2	C4	Plate 4	GAPDH_Intron3_2	GAPDH	1	71	16	>4	6.3	1.4				Plate4_r03c04f01p01-ch1sk1fk1fl1.tiff
C4_F1R2	C4	Plate 4	TAF9B_Intron1_2	TAF9B	1	87	16	>4	6.3	1.1				Plate4_r03c04f01p01-ch1sk1fk1fl1.tiff
C4_F1R2	C4	Plate 4	SIRT7_Intron1_1	SIRT7	1	10	16	>4	6.3	10				Plate4_r03c04f01p01-ch1sk1fk1fl1.tiff
C4_F1R3	C4	Plate 7	DNMT1_Intron21_1	DNMT1	11	17	18	1	61.1	64.7	DNMT1	DNMT1_Intron21_1	1	Plate7_r03c04f01p01-ch1sk1fk1fl1.tiff
C4_F1R3	C4	Plate 7	VPS4B_Intron1_1	VPS4B	1	84	18	2	5.6	1.2	DNMT1	DNMT1_Intron21_1	1	Plate7_r03c04f01p01-ch1sk1fk1fl1.tiff
C4_F1R3	C4	Plate 7	GATAD2A_Intron7_1	GATAD2A	1	58	18	3	5.6	1.7	DNMT1	DNMT1_Intron21_1	1	Plate7_r03c04f01p01-ch1sk1fk1fl1.tiff
C4_F1R3	C4	Plate 7	MTHFD1_Intron22_2	MTHFD1	1	74	18	4	5.6	1.4	DNMT1	DNMT1_Intron21_1	1	Plate7_r03c04f01p01-ch1sk1fk1fl1.tiff
C4_F1R3	C4	Plate 7	ACLY_Intron7_1	ACLY	1	68	18	>4	5.6	1.5	DNMT1	DNMT1_Intron21_1	1	Plate7_r03c04f01p01-ch1sk1fk1fl1.tiff
C4_F1R3	C4	Plate 7	TARS_Intron1_1	TARS	1	86	18	>4	5.6	1.2	DNMT1	DNMT1_Intron21_1	1	Plate7_r03c04f01p01-ch1sk1fk1fl1.tiff
C4_F1R3	C4	Plate 7	GAPDH_Intron3_2	GAPDH	1	71	18	>4	5.6	1.4	DNMT1	DNMT1_Intron21_1	1	Plate7_r03c04f01p01-ch1sk1fk1fl1.tiff
C4_F1R3	C4	Plate 7	NDUFA1_Intron2_1	NDUFA1	1	12	18	>4	5.6	8.3	DNMT1	DNMT1_Intron21_1	1	Plate7_r03c04f01p01-ch1sk1fk1fl1.tiff
C4_F2R1	C4	Plate 2	TARS_Intron8_1	TARS	15	18	28	1	53.6	83.3	TARS	TARS_Intron8_1	1	Plate2_r03c04f01p01-ch1sk1fk1fl1.tiff
C4_F2R1	C4	Plate 2	SUMF1_Intron1_1	SUMF1	9	13	28	2	32.1	69.2	TARS	TARS_Intron8_1	1	Plate2_r03c04f01p01-ch1sk1fk1fl1.tiff
C4_F2R1	C4	Plate 2	NAMPT_Intron3_1	NAMPT	1	98	28	3	3.6	1	TARS	TARS_Intron8_1	1	Plate2_r03c04f01p01-ch1sk1fk1fl1.tiff
C4_F2R1	C4	Plate 2	EPHX4_Intron1_1	EPHX4	1	43	28	4	3.6	2.3	TARS	TARS_Intron8_1	1	Plate2_r03c04f01p01-ch1sk1fk1fl1.tiff
C4_F2R1	C4	Plate 2	CTNNB1_Intron4_1	CTNNB1	1	70	28	>4	3.6	1.4	TARS	TARS_Intron8_1	1	Plate2_r03c04f01p01-ch1sk1fk1fl1.tiff
C4_F2R1	C4	Plate 2	TAF9B_Intron1_2	TAF9B	1	87	28	>4	3.6	1.1	TARS	TARS_Intron8_1	1	Plate2_r03c04f01p01-ch1sk1fk1fl1.tiff
C4_F2R2	C4	Plate 5	NDUFS3_Intron6_1	NDUFS3	10	15	28	1	35.7	66.7				Plate5_r03c04f01p01-ch1sk1fk1fl1.tiff
C4_F2R2	C4	Plate 5	PLCG1_Intron7_1	PLCG1	9	13	28	2	32.1	69.2				Plate5_r03c04f01p01-ch1sk1fk1fl1.tiff
C4_F2R2	C4	Plate 5	RRM2_Intron2_1	RRM2	1	33	28	3	3.6	3				Plate5_r03c04f01p01-ch1sk1fk1fl1.tiff
C4_F2R2	C4	Plate 5	EHMT1_Intron25_1	EHMT1	1	34	28	4	3.6	2.9				Plate5_r03c04f01p01-ch1sk1fk1fl1.tiff
C4_F2R2	C4	Plate 5	FMO3_Intron2_2	FMO3	1	20	28	>4	3.6	5				Plate5_r03c04f01p01-ch1sk1fk1fl1.tiff
C4_F2R2	C4	Plate 5	MEAF6_Intron3_2	MEAF6	1	19	28	>4	3.6	5.3				Plate5_r03c04f01p01-ch1sk1fk1fl1.tiff
C4_F2R2	C4	Plate 5	TFAM_Intron3_1	TFAM	1	11	28	>4	3.6	9.1				Plate5_r03c04f01p01-ch1sk1fk1fl1.tiff
C4_F2R2	C4	Plate 5	ELOVL4_Intron5_1	ELOVL4	1	6	28	>4	3.6	16.7				Plate5_r03c04f01p01-ch1sk1fk1fl1.tiff
C4_F2R2	C4	Plate 5	OXA1L_Intron1_1	OXA1L	1	74	28	>4	3.6	1.4				Plate5_r03c04f01p01-ch1sk1fk1fl1.tiff
C4_F2R2	C4	Plate 5	TAF9B_Intron1_2	TAF9B	1	87	28	>4	3.6	1.1				Plate5_r03c04f01p01-ch1sk1fk1fl1.tiff
C4_F2R2	C4	Plate 5	KDM3B_Intron6_1	KDM3B	1	32	28	>4	3.6	3.1				Plate5_r03c04f01p01-ch1sk1fk1fl1.tiff
C4_F2R3	C4	Plate 8	NDUFA5_Intron2_1	NDUFA5	16	17	23	1	69.6	94.1	NDUFA5	NDUFA5_Intron2_1	1	Plate8_r03c04f01p01-ch1sk1fk1fl1.tiff
C4_F2R3	C4	Plate 8	UNG_Intron1_1	UNG	3	8	23	2	13	37.5	NDUFA5	NDUFA5_Intron2_1	1	Plate8_r03c04f01p01-ch1sk1fk1fl1.tiff
C4_F2R3	C4	Plate 8	SI_Intron10_1	SI	2	2	23	3	8.7	100	NDUFA5	NDUFA5_Intron2_1	1	Plate8_r03c04f01p01-ch1sk1fk1fl1.tiff
C4_F2R3	C4	Plate 8	GTF3C4_Intron1_1	GTF3C4	1	44	23	4	4.3	2.3	NDUFA5	NDUFA5_Intron2_1	1	Plate8_r03c04f01p01-ch1sk1fk1fl1.tiff
C4_F2R3	C4	Plate 8	LRRK2_Intron46_1	LRRK2	1	24	23	>4	4.3	4.2	NDUFA5	NDUFA5_Intron2_1	1	Plate8_r03c04f01p01-ch1sk1fk1fl1.tiff
C4_F3R1	C4	Plate 3	NT5C3B_Intron1_1	NT5C3B	1	47	4	1	25	2.1				Plate3_r03c04f01p01-ch1sk1fk1fl1.tiff
C4_F3R1	C4	Plate 3	AKR1C2_Intron5_1	AKR1C2	1	30	4	2	25	3.3				Plate3_r03c04f01p01-ch1sk1fk1fl1.tiff
C4_F3R1	C4	Plate 3	OAT_Intron6_1	OAT	1	121	4	3	25	0.8				Plate3_r03c04f01p01-ch1sk1fk1fl1.tiff
C4_F3R1	C4	Plate 3	STAT5A_Intron14_1	STAT5A	1	25	4	4	25	4				Plate3_r03c04f01p01-ch1sk1fk1fl1.tiff
C4_F3R2	C4	Plate 6	PGAM1_Intron2_3	PGAM1	11	15	14	1	78.6	73.3	PGAM1	PGAM1_Intron2_3	1	Plate6_r03c04f01p01-ch1sk1fk1fl1.tiff
C4_F3R2	C4	Plate 6	EHMT1_Intron25_1	EHMT1	1	34	14	2	7.1	2.9	PGAM1	PGAM1_Intron2_3	1	Plate6_r03c04f01p01-ch1sk1fk1fl1.tiff
C4_F3R2	C4	Plate 6	PYGL_Intron4_1	PYGL	1	121	14	3	7.1	0.8	PGAM1	PGAM1_Intron2_3	1	Plate6_r03c04f01p01-ch1sk1fk1fl1.tiff
C4_F3R2	C4	Plate 6	STAT5A_Intron14_1	STAT5A	1	25	14	4	7.1	4	PGAM1	PGAM1_Intron2_3	1	Plate6_r03c04f01p01-ch1sk1fk1fl1.tiff
C5_F1R1	C5	Plate 1	UQCRC2_Intron11_1	UQCRC2	44	86	58	1	75.9	51.2	UQCRC2	UQCRC2_Intron11_1	1	Plate1_r03c05f01p01-ch1sk1fk1fl1.tiff
C5_F1R1	C5	Plate 1	ODC1_Intron7_1	ODC1	2	10	58	2	3.4	20	UQCRC2	UQCRC2_Intron11_1	1	Plate1_r03c05f01p01-ch1sk1fk1fl1.tiff
[truncated: 4,003 more rows]

## Sheet: Supplementary Table S4
# Supplemental Table S4: Summary of results from the genomic GFP integration site analysis
	subpool 1		subpool 2		subpool 3
total reads	98405		101405		93672
reads with a minimum length of 50 bps and a sequence matching to GFP and the linker sequence	65554		68689		68595
reads with a minimum length of 210 (= reads reaching at least 68 bp into the genomic DNA)	1963		2014		5236
trimmed reads not aligning to human genome	452		1199		1059
trimmed reads aligning to the plasmid backbone	268	0.136526	204	0.101291	262	0.0500382
trimmed reads aligning to the 3' prime end of an upstream GFP (double insertion)	4	0.0020377	144	0.0714995	153	0.0292208
trimmed reads not aligning to genome or plasmid	180	0.0916964	851	0.422542	644	0.122995
trimmed reads aligning once in the genome	1502		697		4088
trimmed reads aligning more than once in the genome (only the best hit is reported by bowtie2)	9		118		89
on target	1267	0.645441	693	0.344091	3984	0.760886
off target	242		114		188
alignment to a non annotated region	2		8		5
off target or not annotated	244	0.1243	122	0.060576	193	0.0368602
number of differnt integration sites	17		32		38
integration sites with corresponding sgRNA	13 out of 17		23 out of 32		31 out of 38
#subpool 1
# Program:featureCounts v2.0.1; Command:"featurecounts" "-a" "Homo_sapiens.GRCh38.90.chr.gtf" "-t" "gene" "-O" "-o" "int1.out" "int1.sam"
# some genomic regions have multiple annotations (e.g. overlapping genes); these regions are highlighted in red, and were considered "on-target" if one of the annotations is the target gene													sgRNA	Gene	subpool_1	integrationSites_readCount
Geneid	Column1	Chr	Start	End	Strand	Length	integrationSites_readCount	sgRNA_readCount		total_readCounts	on-target_readCounts		SAT2_Intron1_1	SAT2	915	284
ENSG00000129214	SHBG	17	7613946	7633383	+	19438	284	#N/A					NAT10_Intron5_1	NAT10	886	8
ENSG00000141504	SAT2	17	7626234	7627876	-	1643	284	915		284	284		GLS_Intron2_1	GLS	762	191
ENSG00000127884	ECHS1	10	133362480	133373689	-	11210	201	439		201	201		MEAF6_Intron1_1	MEAF6	580	24
ENSG00000115419	GLS	2	190880827	190965552	+	84726	191	762		191	191		ECHS1_Intron7_2	ECHS1	439	201
ENSG00000100348	TXN2	22	36467036	36482030	-	14995	152	#N/A		152			ARG2_Intron1_2	ARG2	396	52
ENSG00000146701	MDH2	7	76048051	76067508	+	19458	131	167		131	131		LPGAT1_Intron4_1	LPGAT1	383	#N/A
ENSG00000140632	GLYR1	16	4803203	4847342	-	44140	101	212		101	101		NUDT3_Intron1_2	NUDT3	376	#N/A
ENSG00000136518	ACTL6A	3	179562880	179588408	+	25529	96	217		96	96		COX7B_Intron3_2	COX7B	371	37
ENSG00000145934	TENM2	5	167284799	168264157	+	979359	83	#N/A		83			SIRT7_Intron1_1	SIRT7	332	#N/A
ENSG00000177192	PUS1	12	131929200	131945896	+	16697	60	146		60	60		SART3_Intron1_1	SART3	313	#N/A
ENSG00000081181	ARG2	14	67619798	67651720	+	31923	52	396		52	52		PIK3R4_Intron9_1	PIK3R4	286	#N/A
ENSG00000165672	PRDX3	10	119167703	119178833	-	11131	51	147		51	51		MBOAT2_Intron1_1	MBOAT2	249	#N/A
ENSG00000131174	COX7B	X	77899438	77907373	+	7936	37	371		37	37		ACTL6A_Intron13_1	ACTL6A	217	96
ENSG00000163875	MEAF6	1	37492575	37514774	-	22200	24	580		24	24		PUS7_Intron4_2	PUS7	214	#N/A
ENSG00000198380	GFPT1	2	69319769	69387254	-	67486	22	189		22	22		GLYR1_Intron4_1	GLYR1	212	101
ENSG00000138363	ATIC	2	215311817	215349773	+	37957	15	169		15	15		SREBF1_Intron7_1	SREBF1	199	#N/A
ENSG00000230876	LINC00486	2	32825443	32926693	+	101251	7	#N/A		7			CYP51A1_Intron1_1	CYP51A1	191	#N/A
ENSG00000188906	LRRK2	12	40196744	40369285	+	172542	2	#N/A		2	2		GFPT1_Intron13_1	GFPT1	189	22
													ATIC_Intron11_1	ATIC	169	15
									sum:	1509	1267		MDH2_Intron6_1	MDH2	167	131
										off-target:	242		PRDX3_Intron1_2	PRDX3	147	51
													PUS1_Intron2_2	PUS1	146	60
													DARS2_Intron4_1	DARS2	116	#N/A
													PLA2G4E_Intron9_1	PLA2G4E	64	#N/A
													EDEM2_Intron7_1	EDEM2	46	#N/A
													NAGK_Intron2_1	NAGK	36	#N/A
													CS_Intron3_1	CS	7	#N/A
													CYB5B_Intron1_1	CYB5B	1	#N/A
#subpool 2
# Program:featureCounts v2.0.1; Command:"featurecounts" "-a" "Homo_sapiens.GRCh38.90.chr.gtf" "-t" "gene" "-O" "-o" "int2.out" "int2.sam"
# some genomic regions have multiple annotations (e.g. overlapping genes); these regions are highlighted in red, and were considered "on-target" if one of the annotations is the target gene													sgRNA	Gene	subpool_2	integrationSites_readCount
Geneid	Column1	Chr	Start	End	Strand	Length	integrationSites_readCount	sgRNA_readCount		total_readCounts	on-target_readCounts		TAF9B_Intron1_2	TAF9B	831	#N/A
ENSG00000197558	SSPO	7	149776042	149833979	+	57938	100	#N/A		100			PKD1_Intron42_1	PKD1	559	#N/A
ENSG00000011376	LARS2	3	45388506	45549421	+	160916	93	306		93	93		ATAD3A_Intron4_1	ATAD3A	465	68
ENSG00000138018	SELENOI	2	26308547	26395891	+	87345	75	218		75	75		ADH1C_Intron5_1	ADH1C	449	#N/A
ENSG00000197785	ATAD3A	1	1512151	1534687	+	22537	68	465		68	68		KMT2B_Intron11_1	KMT2B	424	#N/A
ENSG00000167325	RRM1	11	4094707	4138876	+	44170	58	184		58	58		NAT10_Intron5_1	NAT10	387	8
ENSG00000158290	CUL4B	X	120524609	120575794	-	51186	55	323		55	55		ENDOG_Intron1_1	ENDOG	348	#N/A
ENSG00000084774	CAD	2	27217390	27243943	+	26554	53	323		53	53		CAD_Intron25_1	CAD	323	53
ENSG00000163875	MEAF6	1	37492575	37514774	-	22200	51	260		51	51		CUL4B_Intron20_1	CUL4B	323	55
ENSG00000100504	PYGL	14	50857891	50944736	-	86846	45	186		45	45		LARS2_Intron8_1	LARS2	306	93
ENSG00000092964	DPYSL2	8	26514022	26658178	+	144157	42	135		42	42		MEAF6_Intron3_2	MEAF6	260	51
ENSG00000284512	AC092718.8	16	81022316	81096284	-	73969	30	#N/A					PARK7_Intron3_2	PARK7	225	#N/A
ENSG00000260643	AC092718.3	16	81053587	81096296	-	42710	30	#N/A					SELENOI_Intron2_1	SELENOI	218	75
ENSG00000140905	GCSH	16	81081938	81096425	-	14488	30	73		30	30		ANGPTL4_Intron1_1	ANGPTL4	217	#N/A
ENSG00000141698	NT5C3B	17	41825181	41836263	-	11083	29	147		29	29		FASN_Intron22_1	FASN	188	11
ENSG00000100442	FKBP3	14	45115600	45135319	-	19720	25	179		25	25		PYGL_Intron4_1	PYGL	186	45
ENSG00000124486	USP9X	X	41085635	41236579	+	150945	11	121		11	11		RRM1_Intron17_1	RRM1	184	58
ENSG00000169710	FASN	17	82078333	82098332	-	20000	11	#N/A		11	11		FKBP3_Intron2_1	FKBP3	179	25
ENSG00000133313	CNDP2	18	74495816	74523454	+	27639	10	57		10	10		PSAT1_Intron1_2	PSAT1	166	#N/A
ENSG00000156467	UQCRB	8	96225920	96235634	-	9715	9	70		9	9		NT5C3B_Intron2_1	NT5C3B	147	29
ENSG00000135372	NAT10	11	34105602	34147670	+	42069	8	89		8	8		DPYSL2_Intron7_1	DPYSL2	135	42
ENSG00000230876	LINC00486	2	32825443	32926693	+	101251	7	#N/A		7			KMT5A_Intron2_1	KMT5A	124	#N/A
ENSG00000138413	IDH1	2	208236227	208266074	-	29848	6	59		6	6		USP9X_Intron42_1	USP9X	121	11
ENSG00000107164	FUBP3	9	130578965	130638352	+	59388	4	88		4	4		DIRC2_Intron5_1	DIRC2	110	#N/A
ENSG00000073578	SDHA	5	218241	256700	+	38460	3	3		3	3		ITPA_Intron1_2	ITPA	102	3
ENSG00000125877	ITPA	20	3208868	3223870	+	15003	3	102		3	3		NAT10_Intron26_1	NAT10	89	8
ENSG00000067704	IARS2	1	220094102	220148041	+	53940	2	29		2	2		FUBP3_Intron9_1	FUBP3	88	4
ENSG00000198056	PRIM1	12	56731596	56752373	-	20778	2	49		2	2		USP9X_Intron31_1	USP9X	86	11
ENSG00000078674	PCM1	8	17922840	18029944	+	107105	1	#N/A		1			EPHX2_Intron6_1	EPHX2	83	#N/A
ENSG00000171862	PTEN	10	87863113	87971930	+	108818	1	#N/A		1			ALDH18A1_Intron3_1	ALDH18A1	73	#N/A
ENSG00000052749	RRP12	10	97356358	97426076	-	69719	1	#N/A		1			GCSH_Intron2_3	GCSH	73	30
ENSG00000127452	FBXL12	19	9810267	9827816	-	17550	1	#N/A		1			DPYSL2_Intron1_1	DPYSL2	71	42
ENSG00000266913	LINC01841	19	14305458	14370196	-	64739	1	#N/A					UQCRB_Intron3_3	UQCRB	70	9
ENSG00000267147	LINC01842	19	14333743	14343916	+	10174	1	#N/A		1			IDH1_Intron4_2	IDH1	59	6
ENSG00000196705	ZNF431	19	21142024	21196053	+	54030	1	#N/A		1			CNDP2_Intron5_1	CNDP2	57	10
ENSG00000231236	AP001605.1	21	27358885	27448579	-	89695	1	#N/A		1			PRIM1_Intron8_1	PRIM1	49	2
									sum:	807	693		PPA2_Intron3_1	PPA2	40	#N/A
										off-target:	114		IARS2_Intron21_1	IARS2	29	2
													HADH_Intron2_1	HADH	11	#N/A
													SDHA_Intron9_1	SDHA	3	3
													ASXL1_Intron1_1	ASXL1	2	#N/A
													QARS_Intron18_1	QARS	1	#N/A
#subpool 3
# Program:featureCounts v2.0.1; Command:"featurecounts" "-a" "Homo_sapiens.GRCh38.90.chr.gtf" "-t" "gene" "-O" "-o" "int3.out" "int3.sam"
# some genomic regions have multiple annotations (e.g. overlapping genes); these regions are highlighted in red, and were considered "on-target" if one of the annotations is the target gene														sgRNA	Gene	subpool_3	integrationSites_readCount
Geneid	Column1	Chr	Start	End	Strand	Length	integrationSites_readCount	sgRNA_readCount		total_readCounts	on-target_readCounts			ATAD3A_Intron4_1	ATAD3A	531	68
ENSG00000084774	CAD	2	27217390	27243943	+	26554	333	319		333	333			IDH3B_Intron2_1	IDH3B	330	247
ENSG00000167900	TK1	17	78174075	78187233	-	13159	316	299		316	316			CAD_Intron25_1	CAD	319	53
ENSG00000197785	ATAD3A	1	1512151	1534687	+	22537	285	531		285	285			POMGNT1_Intron20_1	POMGNT1	318	#N/A
ENSG00000101365	IDH3B	20	2658395	2664219	-	5825	247	330		247	247			QARS_Intron9_1	QARS	315	143
ENSG00000173660	UQCRH	1	46303631	46316776	+	13146	246	145		246	246			TK1_Intron1_1	TK1	299	316
ENSG00000113407	TARS	5	33440696	33469539	+	28844	233	271		233	233			DBI_Intron2_2	DBI	287	227
ENSG00000197894	ADH5	4	99070978	99088801	-	17824	229	173		229	229			TARS_Intron1_1	TARS	271	233
ENSG00000155368	DBI	2	119366921	119372560	+	5640	227	287		227	227			NAGS_Intron3_2	NAGS	249	#N/A
ENSG00000124486	USP9X	X	41085635	41236579	+	150945	202	216		202	202			OXCT1_Intron15_1	OXCT1	232	179
ENSG00000140632	GLYR1	16	4803203	4847342	-	44140	199	222		199	199			GLYR1_Intron10_1	GLYR1	222	101
ENSG00000083720	OXCT1	5	41730065	41870519	-	140455	179	232		179	179			PGAM1_Intron2_3	PGAM1	217	176
ENSG00000171314	PGAM1	10	97426160	97433441	+	7282	176	217		176	176			USP9X_Intron9_1	USP9X	216	11
ENSG00000102081	FMR1	X	147911951	147951125	+	39175	166	192		166	166			CYP26C1_Intron5_1	CYP26C1	216	#N/A
ENSG00000162813	BPNT1	1	220057482	220090462	-	32981	163	194		163	163			GOT2_Intron3_1	GOT2	205	#N/A
ENSG00000172053	QARS	3	49095932	49105135	-	9204	143	315		143	143			RTN4IP1_Intron3_1	RTN4IP1	197	#N/A
ENSG00000127884	ECHS1	10	133362480	133373689	-	11210	141	175		141	141			BPNT1_Intron7_1	BPNT1	194	163
ENSG00000138413	IDH1	2	208236227	208266074	-	29848	100	166		100	100			FMR1_Intron11_1	FMR1	192	166
ENSG00000168291	PDHB	3	58427630	58433857	-	6228	96	185		96	96			BSCL2_Intron5_1	BSCL2	189	#N/A
ENSG00000145934	TENM2	5	167284799	168264157	+	979359	85	#N/A		85				PDHB_Intron1_1	PDHB	185	96
ENSG00000166123	GPT2	16	46884378	46931297	+	46920	66	132		66	66			NT5C3A_Intron1_1	NT5C3A	179	#N/A
ENSG00000072786	STK10	5	172042073	172188386	-	146314	48	#N/A		48				ECHS1_Intron7_2	ECHS1	175	201
ENSG00000011376	LARS2	3	45388506	45549421	+	160916	39	66		39	39			ADH5_Intron5_1	ADH5	173	229
ENSG00000167693	NXN	17	799313	979770	-	180458	37	43		37	37			EP300_Intron30_1	EP300	170	#N/A
ENSG00000067704	IARS2	1	220094102	220148041	+	53940	36	54		36	36			IDH1_Intron4_2	IDH1	166	6
ENSG00000164105	SAP30	4	173369969	173377532	+	7564	34	11		34	34			UQCRH_Intron1_2	UQCRH	145	246
ENSG00000100056	ESS2	22	19130279	19144684	-	14406	32	#N/A		32				TYMS_Intron4_1	TYMS	140	#N/A
ENSG00000133706	LARS	5	146113038	146182660	-	69623	29	71		29	29			CYP26B1_Intron5_1	CYP26B1	132	#N/A
ENSG00000091039	OSBPL8	12	76351797	76559809	-	208013	23	19		23	23			GPT2_Intron2_1	GPT2	132	66
ENSG00000164904	ALDH7A1	5	126531200	126595418	-	64219	16	42		16	16			PRDX3_Intron6_2	PRDX3	131	51
ENSG00000230876	LINC00486	2	32825443	32926693	+	101251	12	#N/A		12				QARS_Intron18_1	QARS	128	143
ENSG00000254756	AP001107.6	11	66334494	66339875	+	5382	10	#N/A						SART3_Intron1_1	SART3	110	#N/A
ENSG00000174744	BRMS1	11	66337333	66345125	-	7793	10	8		10	10			ST3GAL2_Intron2_2	ST3GAL2	100	#N/A
ENSG00000197746	PSAP	10	71816298	71851375	-	35078	8	#N/A		8				PUS7_Intron4_2	PUS7	99	#N/A
ENSG00000138796	HADH	4	107989714	108035175	+	45462	6	16		6	6			TXNDC11_Intron2_1	TXNDC11	95	#N/A
ENSG00000239264	TXNDC5	6	7881517	7910814	-	29298	4	3						USP22_Intron1_1	USP22	81	2
ENSG00000259040	BLOC1S5-TXNDC5	6	7881522	8064364	-	182843	4	#N/A		4	4			LARS_Intron12_1	LARS	71	29
ENSG00000204568	MRPS18B	6	30617709	30626395	+	8687	2	#N/A		2				LARS2_Intron4_1	LARS2	66	93
ENSG00000124422	USP22	17	20999593	21043760	-	44168	2	81		2	2			HDAC7_Intron9_1	HDAC7	60	#N/A
ENSG00000253901	AC103409.1	8	91542924	91907619	-	364696	1	#N/A		1				DPYSL2_Intron7_1	DPYSL2	56	42
ENSG00000256150	AC092471.2	12	2695765	2812902	-	117138	1	#N/A						IARS2_Intron1_1	IARS2	54	2
ENSG00000004478	FKBP4	12	2794953	2805423	+	10471	1	6		1	1			MIER1_Intron10_1	MIER1	52	#N/A
														NXN_Intron3_1	NXN	43	37
									sum:	4172	3984			ALDH7A1_Intron1_1	ALDH7A1	42	16
										off target:	188			OXA1L_Intron1_1	OXA1L	42	#N/A
														OSBPL8_Intron6_1	OSBPL8	19	23
														HADH_Intron2_1	HADH	16	6
														SAP30_Intron1_1	SAP30	11	34
														BRMS1_Intron8_1	BRMS1	8	10
														MTR_Intron7_1	MTR	7	#N/A
														INSIG2_Intron5_2	INSIG2	7	#N/A
														FKBP4_Intron1_1	FKBP4	6	1
														TXNDC5_Intron5_1	TXNDC5	3	4

## Sheet: Supplementary Table S5
# Supplemental Table S5: Lists and sequences of donor plasmids, primers, oligos and antibodies
GFP donor plasmid
entire plasmid sequence	gagatcgagtgccgcatcacCGGCTATTGGTCTTACTGACATCCACTTTGCCTTTCTCTCCACAGggtggcggtggctcgggcggtggtgggtccggtggcggcggatctggcggtggtggatccgtgagcaagggcgaggagctgttcaccggggtggtgcccatcctggtcgagctggacggcgacgtaaacggccacaagttcagcgtgtccggcgagggcgagggcgatgccacctacggcaagctgaccctgaagttcatctgcaccaccggcaagctgcccgtgccctggcccaccctcgtgaccaccctgacctacggcgtgcagtgcttcagccgctaccccgaccacatgaagcagcacgacttcttcaagtccgccatgcccgaaggct…
generic sgRNA targeting site	gagatcgagtgccgcatcac
PAM	CGG
splice acceptor	CTATTGGTCTTACTGACATCCACTTTGCCTTTCTCTCCACAG
(GGGGS)x4 linker	ggtggcggtggctcgggcggtggtgggtccggtggcggcggatctggcggtggtggatcc
EGFP	gtgagcaagggcgaggagctgttcaccggggtggtgcccatcctggtcgagctggacggcgacgtaaacggccacaagttcagcgtgtccggcgagggcgagggcgatgccacctacggcaagctgaccctgaagttcatctgcaccaccggcaagctgcccgtgccctggcccaccctcgtgaccaccctgacctacggcgtgcagtgcttcagccgctaccccgaccacatgaagcagcacgacttcttcaagtccgccatgcccgaaggctacgtccaggagcgcaccatcttcttcaaggacgacggcaactacaagacccgcgccgaggtgaagttcgagggcgacaccctggtgaaccgcatcgagctgaagggcatcgacttcaaggaggac…
(GGGGS)x4 linker	ggcggcggtggatccggtggcggcggatctggcggtggaggttcgggtggcggtgggtcgggcaag
splice donor	GTAAGTATCAATTAGAAGACGAATTC
PAM	CCG
generic sgRNA targeting site	gtgatgcggcactcgatctc
plasmid backbone (pUC 19)	GAATTCttacagacaagctgtgaccgtctccgggagctgcatgtgtcagaggttttcaccgtcatcaccgaaacgcgcgagacgaaagggcctcgtgatacgcctatttttataggttaatgtcatgataataatggtttcttagacgtcaggtggcacttttcggggaaatgtgcgcggaacccctatttgtttatttttctaaatacattcaaatatgtatccgctcatgagacaataaccctgataaatgcttcaataatattgaaaaaggaagagtatgagtattcaacatttccgtgtcgcccttattcccttttttgcggcattttgccttcctgtttttgctcacccagaaacgctggtgaaagtaaaagatgctgaagatcagttgggtgc…
NGS Sequencing
CROP-seq sgRNA amplicon fwd	ATCTTGTGGAAAGGACGAAACACC
CROP-seq sgRNA amplicon rev	tgtctcaagatctagttacgcca
in situ sequencing
RT primer oRT_CROPseq	G+AC+TA+GC+CT+TA+TT+TTAACTTGCTAT
padlock probe oPD_CROPseq	/5Phos/gttttagagctagaaatagcaagCTCCTGTTCGACACCTACCCACCTCATCCCACTCTTCAaaaggacgaaacaccg
sequencing primer oSBS_CROPseq	CACCTCATCCCACTCTTCAaaaggacgaaacaccg
integration site analysis
modified adapter	[Phos]GATCGGAAGAGCCCTACTTACACGTTCCGTCUACACTCTTTCCCTACACGACGCTCTTCCGATC*T
nested first and second PCR adapter fwd	ACACTCTTTCCCTACACGACGCTCTTCCG
nested first PCR GFP rev	tcgccgtccagctcgaccaggat
nested second PCR GFP rev	GACTGGAGTTCAGACGTGTGCTCTTCCGATCTccaccccggtgaacagctcctcg
multiplexed amplicon sequencing barcodes
FWD1_1	GAGAAATCTTGTGGAAAGGACGAAACAC
FWD1_2	CAAGAATCTTGTGGAAAGGACGAAACAC
FWD1_3	GAACAATCTTGTGGAAAGGACGAAACAC
FWD1_4	CCATAATCTTGTGGAAAGGACGAAACAC
FWD1_5	GTTAGATCTTGTGGAAAGGACGAAACAC
FWD1_6	ACTCGATCTTGTGGAAAGGACGAAACAC
FWD1_7	TGTTGATCTTGTGGAAAGGACGAAACAC
FWD1_8	AGGTCATCTTGTGGAAAGGACGAAACAC
FWD1_9	AGGAAATCTTGTGGAAAGGACGAAACAC
FWD1_10	ACAGAATCTTGTGGAAAGGACGAAACAC
FWD1_11	AGACAATCTTGTGGAAAGGACGAAACAC
FWD1_12	TGGTAATCTTGTGGAAAGGACGAAACAC
FWD2_1	CTAGGATCTTGTGGAAAGGACGAAACAC
FWD2_2	CGATGATCTTGTGGAAAGGACGAAACAC
FWD2_3	TTCGCATCTTGTGGAAAGGACGAAACAC
FWD2_4	GGTTCATCTTGTGGAAAGGACGAAACAC
FWD2_5	CCGAAATCTTGTGGAAAGGACGAAACAC
FWD2_6	TCGGAATCTTGTGGAAAGGACGAAACAC
FWD2_7	AAGCAATCTTGTGGAAAGGACGAAACAC
FWD2_8	TCCTAATCTTGTGGAAAGGACGAAACAC
FWD2_9	AATGGATCTTGTGGAAAGGACGAAACAC
FWD2_10	GCATGATCTTGTGGAAAGGACGAAACAC
FWD2_11	TATGCATCTTGTGGAAAGGACGAAACAC
FWD2_12	CCTGTATCTTGTGGAAAGGACGAAACAC
FWD3_1	GTGGAATCTTGTGGAAAGGACGAAACAC
FWD3_2	CTGCAATCTTGTGGAAAGGACGAAACAC
FWD3_3	ACCAAATCTTGTGGAAAGGACGAAACAC
FWD3_4	TGCGAATCTTGTGGAAAGGACGAAACAC
FWD3_5	TGTCAATCTTGTGGAAAGGACGAAACAC
FWD3_6	TAGAGATCTTGTGGAAAGGACGAAACAC
FWD3_7	TACCGATCTTGTGGAAAGGACGAAACAC
FWD3_8	TTGTGATCTTGTGGAAAGGACGAAACAC
FWD3_9	ACACCATCTTGTGGAAAGGACGAAACAC
FWD3_10	ACCTTATCTTGTGGAAAGGACGAAACAC
FWD3_11	CTCTAATCTTGTGGAAAGGACGAAACAC
FWD3_12	TCACGATCTTGTGGAAAGGACGAAACAC
REV1_A	GGCAATGTCTCAAGATCTAGTTACGCCA
REV1_B	AACGATGTCTCAAGATCTAGTTACGCCA
REV1_C	GTCCATGTCTCAAGATCTAGTTACGCCA
REV1_D	TGAAGTGTCTCAAGATCTAGTTACGCCA
REV1_E	GTACGTGTCTCAAGATCTAGTTACGCCA
REV1_F	ACGTGTGTCTCAAGATCTAGTTACGCCA
REV1_G	CAACCTGTCTCAAGATCTAGTTACGCCA
REV1_H	CACTTTGTCTCAAGATCTAGTTACGCCA
REV2_A	CGTAATGTCTCAAGATCTAGTTACGCCA
REV2_B	GGTGATGTCTCAAGATCTAGTTACGCCA
REV2_C	CCTCATGTCTCAAGATCTAGTTACGCCA
REV2_D	ATGAGTGTCTCAAGATCTAGTTACGCCA
REV2_E	ATCCGTGTCTCAAGATCTAGTTACGCCA
REV2_F	GACTGTGTCTCAAGATCTAGTTACGCCA
REV2_G	TCTCCTGTCTCAAGATCTAGTTACGCCA
REV2_H	GCTAATGTCTCAAGATCTAGTTACGCCA
REV3_A	CTTGATGTCTCAAGATCTAGTTACGCCA
REV3_B	GGATATGTCTCAAGATCTAGTTACGCCA
REV3_C	AGTAGTGTCTCAAGATCTAGTTACGCCA
REV3_D	GATCGTGTCTCAAGATCTAGTTACGCCA
REV3_E	AGCTGTGTCTCAAGATCTAGTTACGCCA
REV3_F	CTTCCTGTCTCAAGATCTAGTTACGCCA
REV3_G	ATTGCTGTCTCAAGATCTAGTTACGCCA
REV3_H	GTGCTTGTCTCAAGATCTAGTTACGCCA
oligos for cloning of individual intron-targeting sgRNAs
BRD4_Intron6_1 FWD	CACCGACAGCGTGCCTCCAACACAG
BRD4_Intron6_1 REV	AAACCTGTGTTGGAGGCACGCTGTC
MEAF6_Intron1_1 FWD	CACCGGCTAGTCCGTGATCTTTGCG
MEAF6_Intron1_1 REV	AAACCGCAAAGATCACGGACTAGCC
FUBP3_Intron7_1 FWD	CACCGAGTGGCGGACCAAAACTGGG
FUBP3_Intron7_1 REV	AAACCCCAGTTTTGGTCCGCCACTC
AKAP8_Intron5_1 FWD	CACCGGTTGTAGGATCAGACAACAC
AKAP8_Intron5_1 REV	AAACGTGTTGTCTGATCCTACAACC
SFPQ_Intron1_1 FWD	CACCGAGCGCAGGCGCAGATCGTGT
SFPQ_Intron1_1 REV	AAACACACGATCTGCGCCTGCGCTC
ACLY_Intron16_1 FWD	CACCGGGATGGTGACAAGACTCGGA
ACLY_Intron16_1 REV	AAACTCCGAGTCTTGTCACCATCCC
ACLY_Intron22_1 FWD	CACCGAAAAGGGGGGACGAGATACG
ACLY_Intron22_1 REV	AAACCGTATCTCGTCCCCCCTTTTC
RPA2_Intron3_1 FWD	CACCGGTCCCTGCCATCAAGCAGGG
RPA2_Intron3_1 REV	AAACCCCTGCTTGATGGCAGGGACC
UNG_Intron1_1 FWD	CACCGTTTGCCGCGAAAAGACCACG
UNG_Intron1_1 REV	AAACCGTGGTCTTTTCGCGGCAAAC
PCR analysis of clonal cell lines
primers to amplify the 5' junction
BRD4_Intron6_1_fwd	AAAAGCAAGACAAGCCCTCTGG
MEAF6_Intron1_1_fwd	AGAGGGCGCTAGGAAGGG
FUBP3_Intron7_1_fwd	gcagttgcgagtaaaggattgtgg
AKAP8_Intron5_1_fwd	aaacgtgtggccttttgttcctg
SFPQ_Intron1_1_fwd	GTATCCTGTCCCTGGGACTGG
ACLY_Intron16_1_fwd	GTTTGCTGGCCCTGGTTTAGAG
ACLY_Intron22_1_fwd	cagcttcggctcggcatc
RPA2_Intron3_1_fwd	GATAattcattcagcagttattgttggagtacc
GFP_rev	accccggtgaacagct
primers to amplify the 3' junction
BRD4_Intron6_1_rev	AGGGACACAGCACTGTTCCC
MEAF6_Intron1_1_rev	CCCAAACACATCACAACCCTGTC
FUBP3_Intron7_1_rev	TGATTCCAGTCCCTGGAGCATC
AKAP8_Intron5_1_rev	ATCTGGTCCGAAGCGGTCA
SFPQ_Intron1_1_rev	TCGAGAATAGACACACTTCCCCAAAGAG
ACLY_Intron16_1_rev	GTATTTCGGAAGCCCTGCTACAGT
ACLY_Intron22_1_rev	agaatcgcttgaatctgggaggag
RPA2_Intron3_1_rev	tgcagagacagatgtctgaaaggg
GFP_fwd	actctcggcatggacga
Antibodies:
Protein:	Vendor, product number:	Dilution in WB:	Dilution in IF:
AKAP8	Atlas Antibodies, HPA004776	1:2000	1:300
BRD4	Abcam, ab128874	1:1000	1:200
FUBP3	Abcam, ab181122	1:2000	1:100
GAPDH	CST, 5174	1:1000
MEAF6	Origene, TA333700	1:1000	1:500
SFPQ	Atlas Antibodies, HPA047513	1:1000	1:100
Tubulin	Abcam, ab7291	1:5000
Peroxidase AffiniPure Donkey Anti-Mouse IgG	Jackson ImmunoResearch, 715-035-151	1:5000
Peroxidase AffiniPure Donkey Anti-Rabbit IgG	Jackson ImmunoResearch, 711-035-152	1:5000
Donkey anti-Rabbit IgG (H+L) Highly Cross-Adsorbed Secondary Antibody, Alexa Fluor 546	Invitrogen, A10040		1:1000
