# Supplementary figures and images for: Pooled protein tagging, cellular imaging, and in situ sequencing for monitoring drug action in real time
Source: PubMed Central journal article supplement — Genome Res. 2020 Dec;30(12):1846–55. doi: 10.1101/gr.261503.120 (PMC7706735; doi:10.1101/gr.261503.120), 2020-12

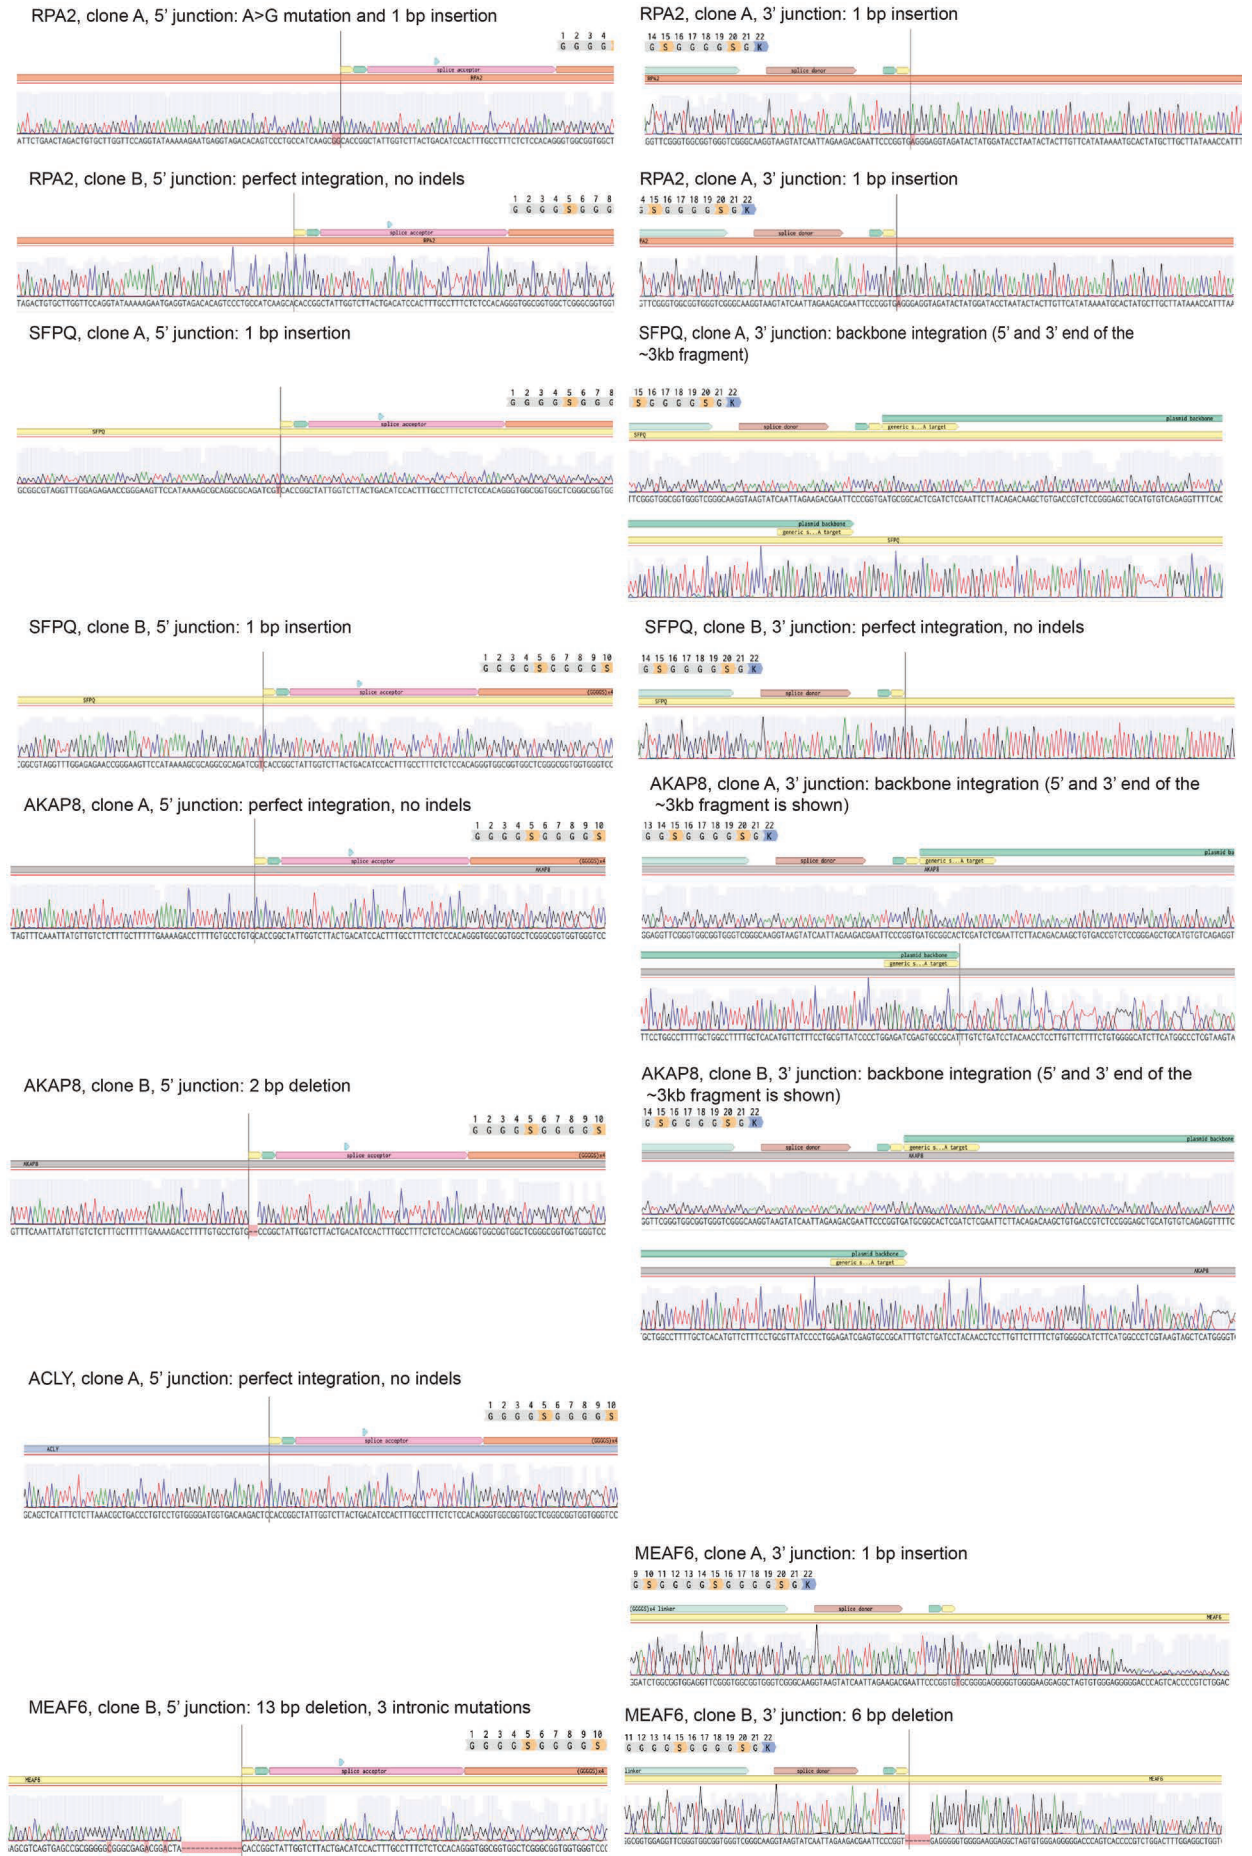

**Supplemental Figure S4. Sanger sequencing of amplicons shown in Supplemental Figure S3.**

Supplement: supp_gr.261503.120_Supplemental_Fig_S4.pdf [file supp_gr.261503.120_Supplemental_Fig_S4.pdf]
